# Supplementary material for: Network-based drug repurposing for novel coronavirus 2019-nCoV/SARS-CoV-2
Source: Springer Nature journal article supplement (doi:10.1038/s41421-020-0153-3), 2020-03-16
Supplement: MOESM1 [file 41421_2020_153_MOESM1_ESM.pdf]

## Supplementary Information

### Network-based Drug Repurposing for Novel Coronavirus 2019-nCoV

Yadi Zhou<sup>1,#</sup>, Yuan Hou<sup>1,#</sup>, Jiayu Shen<sup>1</sup>, Yin Huang<sup>1</sup>, William Martin<sup>1</sup>, Feixiong Cheng<sup>1-3,\*</sup>

<sup>1</sup>Genomic Medicine Institute, Lerner Research Institute, Cleveland Clinic, Cleveland, OH 44195, USA

<sup>2</sup>Department of Molecular Medicine, Cleveland Clinic Lerner College of Medicine, Case Western Reserve University, Cleveland, OH 44195, USA

<sup>3</sup>Case Comprehensive Cancer Center, Case Western Reserve University School of Medicine, Cleveland, OH 44106, USA

#Equal contribution

\*Correspondence to:

Feixiong Cheng, PhD

Lerner Research Institute

Cleveland Clinic

Tel: +1-216-444-7654; Fax: +1-216-636-0009

Email: [chengf@ccf.org](mailto:chengf@ccf.org)

**Supplementary Table S1. Genome information of 15 coronaviruses used for phylogenetic analyses.**

**Supplementary Table S2. Protein sequence identities across 5 protein regions in 15 coronaviruses.**

**Supplementary Table S3. HCoV-associated host proteins with references.**

**Supplementary Table S4. Repurposable drugs predicted by network-based approaches.**

**Supplementary Table S5. Network proximity results for 2,938 drugs against pan-human coronavirus (CoV) and individual CoVs.**

**Supplementary Table S6. Network-predicted drug combinations for all the drug pairs from the top 16 high-confidence repurposable drugs.**

**Supplementary Table S1. Genome information of 15 coronaviruses used for phylogenetic analyses.**

| <b>GenBank ID</b> | <b>Coronavirus</b>     | <b>Identity %</b> | <b>Host</b> | <b>Location discovered</b> |
|-------------------|------------------------|-------------------|-------------|----------------------------|
| MN908947          | 2019-nCoV[Wuhan-Hu-1]  | 100               | Human       | China                      |
| MN938384          | 2019-nCoV[HKU-SZ-002a] | 99.99             | Human       | China                      |
| MN975262          | 2019-nCoV[HKU-SZ-005b] | 99.98             | Human       | China                      |
| AY390556          | SARS-CoV[GZ02]         | 79.7              | Human       | China                      |
| AY485277          | SARS-CoV[Sino1-11]     | 79.7              | Human       | China                      |
| AY508724          | SARS-CoV[NS-1]         | 79.69             | Human       | China                      |
| AY278489          | SARS-CoV[GD01]         | 79.65             | Human       | China                      |
| KT006149          | MERS-CoV[ChinaGD01]    | 54.1              | Human       | China                      |
| KM027262          | MERS-CoV[2014KSA_683]  | 54.02             | Human       | Kingdom of Saudi Arabia    |
| DQ415904          | HCoV-HKU1              | 52.41             | Human       | China                      |
| KJ958219          | HCoV-OC43              | 51.08             | Human       | China                      |
| AC_000192         | MHV                    | 50.23             | Mouse       | USA                        |
| MG772808          | HCoV-NL63              | 49.43             | Human       | South Korea                |
| KY421672          | IBV                    | 48.38             | Avian       | China                      |
| MN306046          | HCoV-229E              | 48.09             | Human       | USA                        |

**Supplementary Table S2. Protein sequence identities across 5 protein regions in 15 coronaviruses.**

| Coronavirus            | GenBank ID  | Identity % | Protein          |
|------------------------|-------------|------------|------------------|
| 2019-nCoV[Wuhan-Hu-1]  | QHD43415.1  | 100        | ORF1ab           |
| 2019-nCoV[HKU-SZ-002a] | QHN73794.1  | 100        | ORF1ab           |
| 2019-nCoV[HKU-SZ-005b] | QHN73809.1  | 99.99      | ORF1ab           |
| SARS-CoV[GZ02]         | AAS00002.1  | 86.51      | ORF1ab           |
| SARS-CoV[Sino1-11]     | AAR23243.1  | 86.44      | ORF1ab           |
| SARS-CoV[GD01]         | AAP51225.1  | 86.35      | ORF1ab           |
| SARS-CoV[NS-1]         | AAR91584.1  | 86.35      | ORF1ab           |
| MERS-CoV[ChinaGD01]    | AKJ80135.2  | 48         | ORF1ab           |
| MERS-CoV[2014KSA_683]  | AIL23987.1  | 47.97      | ORF1ab           |
| HCoV-OC43              | AIX09804.1  | 44.93      | ORF1ab           |
| HCoV-HKU1              | ABD75567.1  | 44.69      | ORF1ab           |
| MHV                    | YP_209229.2 | 44.64      | ORF1ab           |
| HCoV-NL63              | AVA26872.1  | 40.05      | ORF1ab           |
| HCoV-229E              | QEG03783.1  | 39.95      | ORF1ab           |
| IBV                    | ATJ01091.1  | 27.86      | ORF1ab           |
| 2019-nCoV[Wuhan-Hu-1]  | QHD43416.1  | 100        | Spike            |
| 2019-nCoV[HKU-SZ-005b] | QHN73810.1  | 100        | Spike            |
| 2019-nCoV[HKU-SZ-002a] | QHN73795.1  | 100        | Spike            |
| SARS-CoV[GZ02]         | AAS00003.1  | 77.62      | Spike            |
| SARS-CoV[GD01]         | AAP51227.1  | 77.54      | Spike            |
| SARS-CoV[Sino1-11]     | AAR23250.1  | 77.46      | Spike            |
| SARS-CoV[NS-1]         | AAR91586.1  | 77.38      | Spike            |
| MHV                    | YP_209233.1 | 32.12      | Spike            |
| MERS-CoV[ChinaGD01]    | AKJ80137.2  | 31.93      | Spike            |
| MERS-CoV[2014KSA_683]  | AID55073.1  | 31.93      | Spike            |
| HCoV-OC43              | AIX09807.1  | 30.84      | Spike            |
| HCoV-HKU1              | ABD75561.1  | 30.17      | Spike            |
| HCoV-229E              | QEG03785.1  | 27.37      | Spike            |
| IBV                    | ATJ01093.1  | 27.14      | Spike            |
| HCoV-NL63              | AVA26873.1  | 26.89      | Spike            |
| 2019-nCoV[Wuhan-Hu-1]  | QHD43418.1  | 100        | Envelope protein |
| 2019-nCoV[HKU-SZ-002a] | QHN73797.1  | 100        | Envelope protein |
| 2019-nCoV[HKU-SZ-005b] | QHN73812.1  | 100        | Envelope protein |
| SARS-CoV[NS-1]         | AAR91589.1  | 96         | Envelope protein |
| SARS-CoV[GZ02]         | AAS00006.1  | 96         | Envelope protein |
| SARS-CoV[GD01]         | AAP51230.1  | 94.67      | Envelope protein |
| SARS-CoV[Sino1-11]     | AAR23247.1  | 94.59      | Envelope protein |
| MERS-CoV[2014KSA_683]  | AIL23994.1  | 36         | Envelope protein |
| MERS-CoV[ChinaGD01]    | AKJ80142.1  | 36         | Envelope protein |
| HCoV-HKU1              | ABD75563.1  | 29.33      | Envelope protein |
| HCoV-229E              | QEG03787.1  | 27.14      | Envelope protein |
| MHV                    | YP_209236.1 | 21.33      | Envelope protein |
| IBV                    | ATJ01096.1  | 20.27      | Envelope protein |
| HCoV-OC43              | AIX09809.1  | 18.67      | Envelope protein |
| HCoV-NL63              | AVA26875.1  | 17.14      | Envelope protein |
| 2019-nCoV[Wuhan-Hu-1]  | QHD43419.1  | 100        | Membrane         |
| 2019-nCoV[HKU-SZ-002a] | QHN73798.1  | 100        | Membrane         |
| 2019-nCoV[HKU-SZ-005b] | QHN73813.1  | 100        | Membrane         |
| SARS-CoV[GD01]         | AAP51231.1  | 89.59      | Membrane         |
| SARS-CoV[GZ02]         | AAS00007.1  | 89.59      | Membrane         |
| SARS-CoV[NS-1]         | AAR91590.1  | 89.59      | Membrane         |

|                        |             |       |              |
|------------------------|-------------|-------|--------------|
| SARS-CoV[Sino1-11]     | AAR23248.1  | 89.14 | Membrane     |
| MERS-CoV[2014KSA_683]  | AIL23995.1  | 39.27 | Membrane     |
| MERS-CoV[ChinaGD01]    | AKJ80143.1  | 39.27 | Membrane     |
| HCoV-OC43              | AIX09810.1  | 38.29 | Membrane     |
| MHV                    | YP_209237.1 | 37.1  | Membrane     |
| HCoV-HKU1              | ABD75564.1  | 35.29 | Membrane     |
| IBV                    | ATJ01097.1  | 30.56 | Membrane     |
| HCoV-229E              | QEG03788.1  | 28.77 | Membrane     |
| HCoV-NL63              | AVA26876.1  | 27.73 | Membrane     |
| 2019-nCoV[Wuhan-Hu-1]  | QHD43423.2  | 100   | Nucleocapsid |
| 2019-nCoV[HKU-SZ-002a] | QHN73802.1  | 100   | Nucleocapsid |
| 2019-nCoV[HKU-SZ-005b] | QHN73817.1  | 100   | Nucleocapsid |
| SARS-CoV[GD01]         | AAP51234.1  | 89.74 | Nucleocapsid |
| SARS-CoV[GZ02]         | AAS00011.1  | 89.74 | Nucleocapsid |
| SARS-CoV[Sino1-11]     | AAR23249.1  | 89.74 | Nucleocapsid |
| SARS-CoV[NS-1]         | AAR91593.1  | 89.74 | Nucleocapsid |
| MERS-CoV[2014KSA_683]  | AIL23996.1  | 48.85 | Nucleocapsid |
| MERS-CoV[ChinaGD01]    | AKJ80144.1  | 48.85 | Nucleocapsid |
| MHV                    | YP_209238.1 | 35.31 | Nucleocapsid |
| HCoV-HKU1              | ABD75565.1  | 35.22 | Nucleocapsid |
| HCoV-OC43              | AIX09811.1  | 34.79 | Nucleocapsid |
| IBV                    | ATJ01100.1  | 29.46 | Nucleocapsid |
| HCoV-NL63              | AVA26877.1  | 28.03 | Nucleocapsid |
| HCoV-229E              | QEG03789.1  | 27.35 | Nucleocapsid |

**Supplementary Table S3. HCoV-associated host proteins with references.**

| <b>Coronavirus</b> | <b>Host Protein</b> | <b>Host Gene ID</b> | <b>PubMed ID</b> |
|--------------------|---------------------|---------------------|------------------|
| IBV                | NONO                | 4841                | 23637410         |
| IBV                | GSK3A               | 2931                | 23637410         |
| IBV                | GSK3B               | 2932                | 23637410         |
| IBV                | PABPC1              | 26986               | 23637410         |
| IBV                | PABPC4              | 8761                | 23637410         |
| IBV                | HNRNPA1             | 3178                | 23637410         |
| IBV                | HNRNPA2B1           | 3181                | 23637410         |
| IBV                | NPM1                | 4869                | 23637410         |
| IBV                | G3BP1               | 10146               | 23637410         |
| IBV                | G3BP2               | 9908                | 23637410         |
| IBV                | RPL19               | 6143                | 23637410         |
| IBV                | PARP1               | 142                 | 23637410         |
| IBV                | NCL                 | 4691                | 23637410         |
| IBV                | DDX1                | 1653                | 23637410         |
| SARS               | RYBP                | 23429               | 22046132         |
| SARS               | PPIA                | 5478                | 22046132         |
| SARS               | NOMO3               | 408050              | 22046132         |
| SARS               | FKBP1A              | 2280                | 22046132         |
| SARS               | PPIG                | 9360                | 22046132         |
| SARS               | MARK3               | 4140                | 22046132         |
| SARS               | PPIH                | 10465               | 22046132         |
| SARS               | RCAN3               | 11123               | 22046132         |
| SARS               | HGS                 | 9146                | 22046132         |
| SARS               | BAG6                | 7917                | 22046132         |
| SARS               | DDAH2               | 23564               | 22046132         |
| SARS               | CAMLG               | 819                 | 22046132         |
| SARS               | CHMP2B              | 25978               | 22046132         |
| SARS               | SNAP47              | 116841              | 22046132         |
| SARS               | MKRN2               | 23609               | 22046132         |
| SARS               | TPSAB1              | 7177                | 22046132         |
| SARS               | SERPING1            | 710                 | 22046132         |
| SARS               | MKRN3               | 7681                | 22046132         |
| SARS               | PSMA2               | 5683                | 22046132         |
| SARS               | ABHD17A             | 81926               | 22046132         |
| SARS               | PFDN5               | 5204                | 22046132         |
| SARS               | MIF4GD              | 57409               | 22046132         |
| SARS               | NDUFA10             | 4705                | 22046132         |
| SARS               | VKORC1              | 79001               | 22046132         |
| SARS               | LAS1L               | 81887               | 22046132         |
| SARS               | H2AFY2              | 55506               | 22046132         |
| SARS               | RPS20               | 6224                | 22046132         |
| SARS               | CHEK2               | 11200               | 22046132         |
| SARS               | TERF1               | 7013                | 22046132         |
| SARS               | DCTN2               | 10540               | 22046132         |
| SARS               | DDX5                | 1655                | 22046132         |
| SARS               | C11orf74            | 119710              | 22046132         |
| SARS               | EIF3F               | 8665                | 22046132         |
| SARS               | EEF1A1              | 1915                | 22046132         |
| SARS               | CAV1                | 857                 | 22046132         |
| SARS               | IKBKB               | 3551                | 22046132         |
| SARS               | UBE2I               | 7329                | 22046132         |
| SARS               | SGTA                | 6449                | 22046132         |
| SARS               | ATP6V1G1            | 9550                | 22046132         |

|           |           |        |          |
|-----------|-----------|--------|----------|
| SARS      | BTF3      | 689    | 22046132 |
| SARS      | ATF5      | 22809  | 22046132 |
| SARS      | ND4L      | 4539   | 22046132 |
| SARS      | COX2      | 4513   | 22046132 |
| SARS      | HNRNPA1   | 3178   | 22046132 |
| SARS      | ACE2      | 59272  | 22046132 |
| SARS      | CLEC4G    | 339390 | 22046132 |
| SARS      | CD209     | 30835  | 22046132 |
| SARS      | CLEC4M    | 10332  | 22046132 |
| SARS      | IRF3      | 3661   | 22046132 |
| SARS      | KPNA2     | 3838   | 22046132 |
| SARS      | SFTPD     | 6441   | 22046132 |
| SARS      | PPIA      | 5478   | 22046132 |
| SARS      | BCL2L1    | 598    | 22046132 |
| SARS      | BCL2L2    | 599    | 22046132 |
| SARS      | MCL1      | 4170   | 22046132 |
| SARS      | BCL2A1    | 597    | 22046132 |
| SARS      | BCL2      | 596    | 22046132 |
| MERS      | SKP2      | 6502   | 31852899 |
| MERS      | KPNA4     | 3840   | 29370303 |
| MERS      | PRKRA     | 8575   | 24522921 |
| MERS      | CD9       | 928    | 28759649 |
| MERS      | TMPRSS2   | 7113   | 28759649 |
| SARS      | IKBKB     | 3551   | 17705188 |
| HCoV-229E | ANPEP     | 290    | 28643204 |
| HCoV-NL63 | ACE2      | 59272  | 28643204 |
| IBV       | ZCRB1     | 85437  | 28643204 |
| MERS      | DPP4      | 1803   | 28643204 |
| MHV       | HNRNPA1   | 3178   | 28643204 |
| MHV       | SYNCRIP   | 10492  | 28643204 |
| MHV       | PTBP1     | 5725   | 28643204 |
| MHV       | CEACAM1   | 634    | 28643204 |
| SARS      | ZCRB1     | 85437  | 28643204 |
| SARS      | ACE2      | 59272  | 28643204 |
| IBV       | ANXA2     | 302    | 28643204 |
| MHV       | HNRNPA2B1 | 3181   | 28643204 |
| MHV       | HNRNPA3   | 220988 | 28643204 |
| MHV       | ACO2      | 50     | 28643204 |
| MHV       | DNAJB1    | 3337   | 28643204 |
| MHV       | HSPD1     | 3329   | 28643204 |
| MHV       | HSPA9     | 3313   | 28643204 |
| MHV       | COPB2     | 9276   | 30632963 |
| MHV       | RPL13A    | 23521  | 30632963 |
| MHV       | EIF3E     | 3646   | 30632963 |
| MHV       | EIF3I     | 8668   | 30632963 |
| MHV       | NMT1      | 4836   | 30632963 |
| MHV       | CHMP4B    | 128866 | 30632963 |
| MHV       | EIF3F     | 8665   | 30632963 |
| MHV       | GBF1      | 8729   | 30632963 |
| MHV       | RRM2      | 6241   | 30632963 |
| MHV       | KIF11     | 3832   | 30632963 |
| MHV       | PSMD1     | 5707   | 30632963 |
| MHV       | SRP54     | 6729   | 30632963 |
| MHV       | NUDCD1    | 84955  | 30632963 |
| MHV       | NACA      | 4666   | 30632963 |
| MHV       | SNX9      | 51429  | 30632963 |

---

|           |         |       |                |
|-----------|---------|-------|----------------|
| MHV       | BTF3    | 689   | 30632963       |
| MHV       | SCFD1   | 23256 | 30632963       |
| MHV       | PSMC2   | 5701  | 30632963       |
| MHV       | TFEB    | 7942  | 30632963       |
| MHV       | TWF2    | 11344 | 30632963       |
| MHV       | YKT6    | 10652 | 30632963       |
| MHV       | KPNB1   | 3837  | 30632963       |
| MHV       | STX5    | 6811  | 30632963       |
| MHV       | STAT5A  | 6776  | 30632963       |
| MHV       | RSL24D1 | 51187 | 30632963       |
| MHV       | ACBD5   | 91452 | 30632963       |
| SARS      | PHB     | 5245  | STRING Viruses |
| SARS      | JUN     | 3725  | STRING Viruses |
| SARS      | STAT3   | 6774  | STRING Viruses |
| SARS      | PPP1CA  | 5499  | STRING Viruses |
| SARS      | SPECC1  | 92521 | STRING Viruses |
| SARS      | FGL2    | 10875 | STRING Viruses |
| SARS      | XPO1    | 7514  | STRING Viruses |
| HCoV-229E | TGFB1   | 7040  | STRING Viruses |
| HCoV-229E | FGL2    | 10875 | STRING Viruses |
| MHV       | SMAD3   | 4088  | STRING Viruses |

---

**Supplementary Table S4. Repurposable drugs predicted by network-based approaches.**

| DB ID   | Name                                                                                           | Z-score | P-value | GSEA score | Literature evidence                    |
|---------|------------------------------------------------------------------------------------------------|---------|---------|------------|----------------------------------------|
| DB01029 | Irbesartan                                                                                     | -5.98   | 0.001   | NA         | 25929767, 26086883, 24717262           |
| DB02152 | K-252a                                                                                         | -4.22   | 0.006   | NA         |                                        |
| DB08813 | Nadroparin                                                                                     | -3.46   | 0.005   | NA         |                                        |
| DB00890 | Dienestrol                                                                                     | -3.30   | 0.003   | 0          |                                        |
| DB00539 | Toremifene                                                                                     | -3.23   | 0.011   | NA         | 27362232, 29566060, 24841273, 24841269 |
| DB03963 | S-(Dimethylarsenic)Cysteine                                                                    | -3.00   | 0       | NA         |                                        |
| DB08005 | 4-[[5-chloro-4-(1H-indol-3-yl)pyrimidin-2-yl]amino]-N-ethylpiperidine-1-carboxamide            | -2.81   | 0.013   | NA         |                                        |
| DB04930 | Permethrin                                                                                     | -2.67   | 0.011   | NA         |                                        |
| DB01357 | Mestranol                                                                                      | -2.64   | 0.01    | 2          |                                        |
| DB01744 | Camphor                                                                                        | -2.64   | 0.007   | NA         | 27823881,30165308                      |
| DB00286 | Conjugated estrogens                                                                           | -2.60   | 0.007   | NA         |                                        |
| DB02187 | Equilin                                                                                        | -2.52   | 0.012   | 3          | 27169275                               |
| DB00563 | Methotrexate                                                                                   | -2.46   | 0.012   | 2          |                                        |
| DB00544 | Fluorouracil                                                                                   | -2.44   | 0.009   | NA         |                                        |
| DB07931 | Hexestrol                                                                                      | -2.44   | 0.008   | 0          | 27169275                               |
| DB00244 | Mesalazine                                                                                     | -2.44   | 0.005   | 3          | 25914477                               |
| DB01033 | Mercaptopurine                                                                                 | -2.44   | 0.02    | 1          | 18313035, 19374142, 25542975           |
| DB00715 | Paroxetine                                                                                     | -2.42   | 0.014   | 2          | 29272110                               |
| DB00852 | Pseudoephedrine                                                                                | -2.42   | 0.014   | NA         |                                        |
| DB01769 | 3-sulfino-L-alanine                                                                            | -2.41   | 0.015   | NA         |                                        |
| DB00614 | Furazolidone                                                                                   | -2.39   | 0.01    | 2          |                                        |
| DB04824 | Phenolphthalein                                                                                | -2.38   | 0.013   | NA         |                                        |
| DB00877 | Sirinolimus                                                                                    | -2.35   | 0.006   | 3          | 23135723, 26276683, 29143192, 24105455 |
| DB00570 | Vinblastine                                                                                    | -2.28   | 0.014   | 2          |                                        |
| DB00812 | Phenylbutazone                                                                                 | -2.25   | 0.02    | NA         |                                        |
| DB04575 | Quinestrol                                                                                     | -2.23   | 0.015   | NA         |                                        |
| DB04938 | Ospemifene                                                                                     | -2.23   | 0.015   | NA         |                                        |
| DB09092 | Xanthinol                                                                                      | -2.23   | 0.015   | NA         |                                        |
| DB09317 | Synthetic Conjugated Estrogens, A                                                              | -2.23   | 0.015   | NA         |                                        |
| DB09318 | Synthetic Conjugated Estrogens, B                                                              | -2.23   | 0.015   | NA         |                                        |
| DB01183 | Naloxone                                                                                       | -2.22   | 0.021   | 1          |                                        |
| DB00242 | Cladribine                                                                                     | -2.21   | 0.02    | NA         |                                        |
| DB02615 | Compound 19                                                                                    | -2.20   | 0.016   | NA         |                                        |
| DB01275 | Hydralazine                                                                                    | -2.20   | 0.013   | 0          |                                        |
| DB08231 | Myristic acid                                                                                  | -2.19   | 0.018   | NA         |                                        |
| DB00170 | Menadione                                                                                      | -2.17   | 0.012   | 1          |                                        |
| DB01248 | Docetaxel                                                                                      | -2.17   | 0.014   | NA         |                                        |
| DB05465 | Tandutinib                                                                                     | -2.11   | 0.02    | NA         |                                        |
| DB08896 | Regorafenib                                                                                    | -2.06   | 0.017   | NA         |                                        |
| DB08888 | Ocriplasmin                                                                                    | -2.04   | 0.032   | NA         |                                        |
| DB00361 | Vinorelbine                                                                                    | -2.03   | 0.02    | NA         |                                        |
| DB07502 | 4-bromo-6-(6-hydroxy-1,2-benzisoxazol-3-yl)benzene-1,3-diol                                    | -2.02   | 0.019   | NA         |                                        |
| DB06871 | 17-METHYL-17-ALPHA-DIHYDROEQUILENIN                                                            | -2.02   | 0.021   | NA         |                                        |
| DB06898 | 4-(2-amino-1-methyl-1H-imidazo[4,5-b]pyridin-6-yl)phenol                                       | -2.02   | 0.021   | NA         |                                        |
| DB07086 | 4-[(1S,2S,5S)-5-(HYDROXYMETHYL)-8-METHYL-3-OXABICYCLO[3.3.1]NON-7-EN-2-YL]PHENOL               | -2.02   | 0.021   | NA         |                                        |
| DB07087 | 4-[(1S,2S,5S,9R)-5-(HYDROXYMETHYL)-8,9-DIMETHYL-3-OXABICYCLO[3.3.1]NON-7-EN-2-YL]PHENOL        | -2.02   | 0.021   | NA         |                                        |
| DB07195 | 4-[(1S,2S,5S)-5-(HYDROXYMETHYL)-6,8,9-TRIMETHYL-3-OXABICYCLO[3.3.1]NON-7-EN-2-YL]PHENOL        | -2.02   | 0.021   | NA         |                                        |
| DB07678 | (9ALPHA,13BETA,17BETA)-2-[(1Z)-BUT-1-EN-1-YL]ESTRA-1,3,5(10)-TRIENE-3,17-DIOL                  | -2.02   | 0.021   | NA         |                                        |
| DB07707 | (9BETA,11ALPHA,13ALPHA,14BETA,17ALPHA)-11-(METHOXYMETHYL)ESTRA-1(10),2,4-TRIENE-3,17-DIOL      | -2.02   | 0.021   | NA         |                                        |
| DB07708 | 3-CHLORO-2-(4-HYDROXYPHENYL)-2H-INDAZOL-5-OL                                                   | -2.02   | 0.021   | NA         |                                        |
| DB07712 | 3-ETHYL-2-(4-HYDROXYPHENYL)-2H-INDAZOL-5-OL                                                    | -2.02   | 0.021   | NA         |                                        |
| DB07932 | dimethyl (1R,4S)-5,6-bis(4-hydroxyphenyl)-7-oxabicyclo[2.2.1]hepta-2,5-diene-2,3-dicarboxylate | -2.02   | 0.021   | NA         |                                        |
| DB08048 | 4-(6-HYDROXY-1H-INDAZOL-3-YL)BENZENE-1,3-DIOL                                                  | -2.02   | 0.021   | NA         |                                        |



|         |                                                                                                               |       |       |    |                              |
|---------|---------------------------------------------------------------------------------------------------------------|-------|-------|----|------------------------------|
| DB08320 | DIETHYL (1R,2S,3R,4S)-5,6-BIS(4-HYDROXYPHENYL)-7-OXABICYCLO[2.2.1]HEPT-5-ENE-2,3-DICARBOXYLATE                | -2.02 | 0.021 | NA |                              |
| DB08398 | 2-Amino-1-methyl-6-phenylimidazo(4,5-b)pyridine                                                               | -2.02 | 0.021 | NA |                              |
| DB08595 | 4-[(1S,2R,5S)-4,4,8-TRIMETHYL-3-OXABICYCLO[3.3.1]NON-7-EN-2-YL]PHENOL                                         | -2.02 | 0.021 | NA |                              |
| DB03909 | Adenosine-5'-[Beta, Gamma-Methylene]Triphosphate                                                              | -1.98 | 0.016 | NA |                              |
| DB04967 | Lucanthone                                                                                                    | -1.97 | 0.019 | NA |                              |
| DB01136 | Carvedilol                                                                                                    | -1.94 | 0.023 | NA | 12535832                     |
| DB02513 | Thymol                                                                                                        | -1.93 | 0.001 | NA | 28886313                     |
| DB01394 | Colchicine                                                                                                    | -1.92 | 0.027 | 0  | 28795759                     |
| DB00431 | Lindane                                                                                                       | -1.92 | 0.018 | NA |                              |
| DB00098 | Antithymocyte immunoglobulin (rabbit)                                                                         | -1.91 | 0.016 | NA |                              |
| DB00321 | Amitriptyline                                                                                                 | -1.89 | 0.03  | 2  |                              |
| DB00668 | Epinephrine                                                                                                   | -1.88 | 0.031 | NA |                              |
| DB00970 | Dactinomycin                                                                                                  | -1.88 | 0.027 | NA | 1335030                      |
| DB07886 | Hydrocortisone                                                                                                | -1.88 | 0.013 | NA | 16891588                     |
| DB00294 | Etonogestrel                                                                                                  | -1.82 | 0.023 | NA |                              |
| DB00304 | Desogestrel                                                                                                   | -1.82 | 0.023 | NA |                              |
| DB02538 | N-[4-(2-Methylimidazo[1,2-a]Pyridin-3-Yl)-2-Pyrimidinyl]Acetamide                                             | -1.77 | 0.027 | NA |                              |
| DB04006 | [2-Amino-6-(2,6-Difluoro-Benzoyl)-Imidazo[1,2-a]Pyridin-3-Yl]-Phenyl-Methanone                                | -1.77 | 0.027 | NA |                              |
| DB04518 | 3-[4-(2,4-Dimethyl-Thiazol-5-Yl)-Pyrimidin-2-Ylamino]-Phenol                                                  | -1.77 | 0.027 | NA |                              |
| DB07790 | N-(2-METHOXYETHYL)-4-((4-[2-METHYL-1-(1-METHYLETHYL)-1H-IMIDAZOL-5-YL]PYRIMIDIN-2-YL)AMINO)BENZENESULFONAMIDE | -1.77 | 0.027 | NA |                              |
| DB08285 | (2R)-2-[[4-(benzylamino)-8-(1-methylethyl)pyrazolo[1,5-a][1,3,5]triazin-2-yl]amino]butan-1-ol                 | -1.77 | 0.027 | NA |                              |
| DB00714 | Apomorphine                                                                                                   | -1.74 | 0.033 | 3  |                              |
| DB01420 | Testosterone propionate                                                                                       | -1.74 | 0.027 | NA |                              |
| DB01065 | Melatonin                                                                                                     | -1.72 | 0.029 | 2  | 25262626, 20070490           |
| DB06710 | Methyltestosterone                                                                                            | -1.71 | 0.024 | NA |                              |
| DB00108 | Natalizumab                                                                                                   | -1.69 | 0.034 | NA |                              |
| DB00947 | Fulvestrant                                                                                                   | -1.67 | 0.031 | 3  |                              |
| DB08900 | Teduglutide                                                                                                   | -1.66 | 0.004 | NA |                              |
| DB00338 | Omeprazole                                                                                                    | -1.65 | 0.031 | 0  |                              |
| DB00367 | Levonorgestrel                                                                                                | -1.64 | 0.025 | 2  |                              |
| DB06287 | Temsirolimus                                                                                                  | -1.62 | 0.043 | NA |                              |
| DB01103 | Quinacrine                                                                                                    | -1.62 | 0.044 | 1  | 23301007, 31307979, 27890675 |
| DB06782 | Dimercaprol                                                                                                   | -1.60 | 0.041 | NA |                              |
| DB00624 | Testosterone                                                                                                  | -1.60 | 0.035 | 0  | 29557189, 30522976           |
| DB06822 | Tinzaparin                                                                                                    | -1.60 | 0.043 | NA |                              |
| DB00700 | Eplerenone                                                                                                    | -1.59 | 0.028 | NA | 19213804                     |
| DB00162 | Vitamin A                                                                                                     | -1.58 | 0.045 | NA | 8379807, 7751694             |
| DB09148 | Florbetaben (18F)                                                                                             | -1.58 | 0.034 | NA |                              |
| DB09149 | Florbetapir (18F)                                                                                             | -1.58 | 0.034 | NA |                              |
| DB09151 | Flutemetamol (18F)                                                                                            | -1.58 | 0.034 | NA |                              |
| DB02091 | 4-(2,4-Dimethyl-Thiazol-5-Yl)-Pyrimidin-2-Ylamine                                                             | -1.57 | 0.044 | NA |                              |
| DB02915 | 4-(2,4-Dimethyl-1,3-thiazol-5-yl)-N-[4-(trifluoromethyl)phenyl]-2-pyrimidinamine                              | -1.57 | 0.044 | NA |                              |
| DB06844 | 4-[(7-OXO-7H-THIAZOLO[5,4-E]INDOL-8-YLMETHYL)-AMINO]-N-PYRIDIN-2-YL-BENZENESULFONAMIDE                        | -1.57 | 0.044 | NA |                              |
| DB06948 | 2-ANILINO-6-CYCLOHEXYLMETHOXYPURINE                                                                           | -1.57 | 0.044 | NA |                              |
| DB07137 | (2S)-N-[(3Z)-5-CYCLOPROPYL-3H-PYRAZOL-3-YLIDENE]-2-[4-(2-OXOIMIDAZOLIDIN-1-YL)PHENYL]PROPANAMIDE              | -1.57 | 0.044 | NA |                              |
| DB07203 | 6-CYCLOHEXYLMETHOXY-2-(3'-CHLOROANILINO)PURINE                                                                | -1.57 | 0.044 | NA |                              |
| DB07539 | 4-{5-[(Z)-(2-IMINO-4-OXO-1,3-THIAZOLIDIN-5-YLIDENE)METHYL]FURAN-2-YL}BENZOIC ACID                             | -1.57 | 0.044 | NA |                              |
| DB07852 | 1-(3,5-DICHLOROPHENYL)-5-METHYL-1H-1,2,4-TRIAZOLE-3-CARBOXYLIC ACID                                           | -1.57 | 0.044 | NA |                              |
| DB08178 | 4-(4-methoxy-1H-pyrrolo[2,3-b]pyridin-3-yl)pyrimidin-2-amine                                                  | -1.57 | 0.044 | NA |                              |
| DB08182 | 4-(4-propoxy-1H-pyrrolo[2,3-b]pyridin-3-yl)pyrimidin-2-amine                                                  | -1.57 | 0.044 | NA |                              |

|         |                                                                                                                                |       |       |    |                                                  |
|---------|--------------------------------------------------------------------------------------------------------------------------------|-------|-------|----|--------------------------------------------------|
| DB08218 | HYDROXY(OXO)(3-(((2Z)-4-[3-(1H-1,2,4-TRIAZOL-1-YLMETHYL)PHENYL]PYRIMIDIN-2(5H)-YLIDENE]AMINO)PHENYL)AMMONIUM                   | -1.57 | 0.044 | NA |                                                  |
| DB08219 | 4-METHYL-5-((2E)-2-[(4-MORPHOLIN-4-YLPHENYL)IMINO]-2,5-DIHYDROPYRIMIDIN-4-YL)-1,3-THIAZOL-2-AMINE                              | -1.57 | 0.044 | NA |                                                  |
| DB08233 | 6-CYCLOHEXYLMETHYLOXY-2-(4'-HYDROXYANILINO)PURINE                                                                              | -1.57 | 0.044 | NA |                                                  |
| DB08241 | 4-(6-CYCLOHEXYLMETHOXY-9H-PURIN-2-YLAMINO)--BENZAMIDE                                                                          | -1.57 | 0.044 | NA |                                                  |
| DB08248 | 3-(6-CYCLOHEXYLMETHOXY-9H-PURIN-2-YLAMINO)-BENZENESULFONAMIDE                                                                  | -1.57 | 0.044 | NA |                                                  |
| DB08527 | 1-[4-(AMINOSULFONYL)PHENYL]-1,6-DIHYDROPYRAZOLO[3,4-E]INDAZOLE-3-CARBOXAMIDE                                                   | -1.57 | 0.044 | NA |                                                  |
| DB01370 | Aluminium                                                                                                                      | -1.57 | 0.042 | NA |                                                  |
| DB02197 | 4-[(4-Imidazo[1,2-a]Pyridin-3-Ylpyrimidin-2-Yl)Amino]Benzenesulfonamide                                                        | -1.56 | 0.042 | NA |                                                  |
| DB00269 | Chlorotrianisene                                                                                                               | -1.55 | 0.047 | NA |                                                  |
| DB01878 | Benzophenone                                                                                                                   | -1.55 | 0.047 | NA |                                                  |
| DB04020 | 4-(2-[[4-[[3-(4-Chlorophenyl)Propyl]Sulfanyl]-6-(1-Piperazinyl)-1,3,5-Triazin-2-Yl]Amino]Ethyl)Phenol                          | -1.55 | 0.047 | NA |                                                  |
| DB05414 | Pipendoxifene                                                                                                                  | -1.55 | 0.047 | NA |                                                  |
| DB06401 | Bazedoxifene                                                                                                                   | -1.55 | 0.047 | NA |                                                  |
| DB06937 | 4-(6-HYDROXY-BENZO[D]ISOXAZOL-3-YL)BENZENE-1,3-DIOL                                                                            | -1.55 | 0.047 | NA |                                                  |
| DB07036 | (3aS,4R,9bR)-2,2-difluoro-4-(4-hydroxyphenyl)-6-(methoxymethyl)-1,2,3,3a,4,9b-hexahydrocyclopenta[c]chromen-8-ol               | -1.55 | 0.047 | NA |                                                  |
| DB07567 | (2R,3R,4S)-3-(4-HYDROXYPHENYL)-4-METHYL-2-[4-(2-PYRROLIDIN-1-YLETHOXY)PHENYL]CHROMAN-6-OL                                      | -1.55 | 0.047 | NA |                                                  |
| DB07638 | (3AS,4R,9BR)-2,2-DIFLUORO-4-(4-HYDROXYPHENYL)-1,2,3,3A,4,9B-HEXAHDROCYCLOPENTA[C]CHROMEN-8-OL                                  | -1.55 | 0.047 | NA |                                                  |
| DB07757 | (9aS)-4-bromo-9a-butyl-7-hydroxy-1,2,9,9a-tetrahydro-3H-fluoren-3-one                                                          | -1.55 | 0.047 | NA |                                                  |
| DB07933 | Erteberel                                                                                                                      | -1.55 | 0.047 | NA |                                                  |
| DB07991 | N-[(1R)-3-(4-HYDROXYPHENYL)-1-METHYLPROPYL]-2-(2-PHENYL-1H-INDOL-3-YL)ACETAMIDE                                                | -1.55 | 0.047 | NA |                                                  |
| DB08020 | (3AS,4R,9BR)-4-(4-HYDROXYPHENYL)-6-(METHOXYMETHYL)-1,2,3,3A,4,9B-HEXAHDROCYCLOPENTA[C]CHROMEN-8-OL                             | -1.55 | 0.047 | NA |                                                  |
| DB08737 | (3AS,4R,9BR)-4-(4-HYDROXYPHENYL)-1,2,3,3A,4,9B-HEXAHDROCYCLOPENTA[C]CHROMEN-9-OL                                               | -1.55 | 0.047 | NA |                                                  |
| DB09535 | Octocrylene                                                                                                                    | -1.55 | 0.047 | NA |                                                  |
| DB07715 | Emodin                                                                                                                         | -1.54 | 0.035 | NA | 21050882, 16940925, 21356245, 16730806, 24071990 |
| DB00851 | Dacarbazine                                                                                                                    | -1.53 | 0.036 | 0  |                                                  |
| DB06412 | Oxymetholone                                                                                                                   | -1.53 | 0.041 | NA | 12815555                                         |
| DB00396 | Progesterone                                                                                                                   | -1.53 | 0.034 | 1  |                                                  |
| DB07471 | 5-[5,6-BIS(METHYLOXY)-1H-BENZIMIDAZOL-1-YL]-3-[[1-(2-CHLOROPHENYL)ETHYL]OXY]-2-THIOPHENECARBOXAMIDE                            | -1.52 | 0.036 | NA |                                                  |
| DB02901 | Stanolone                                                                                                                      | -1.52 | 0.043 | NA |                                                  |
| DB03801 | Lysine Nz-Carboxylic Acid                                                                                                      | -1.51 | 0.04  | NA |                                                  |
| DB08683 | REL-(9R,12S)-9,10,11,12-TETRAHYDRO-9,12-EPOXY-1H-DIINDOLO[1,2,3-FG:3',2',1'-KL]PYRROLO[3,4-I][1,6]BENZODIAZOCINE-1,3(2H)-DIONE | -1.51 | 0.045 | NA |                                                  |
| DB09257 | Gimeracil                                                                                                                      | -1.50 | 0.009 | NA |                                                  |

Supplementary Table S5. Network proximity results for 2,938 drugs against pan-human coronavirus (CoV) and individual CoVs.

| DrugBank ID | Name                                                                                | Z-score |        |        |        |        | P value |       |       |       |       |
|-------------|-------------------------------------------------------------------------------------|---------|--------|--------|--------|--------|---------|-------|-------|-------|-------|
|             |                                                                                     | Pan     | SARS   | MERS   | IBV    | MHV    | Pan     | SARS  | MERS  | IBV   | MHV   |
| DB01029     | Irbesartan                                                                          | -5.984  | -3.788 | -1.329 | -4.894 | -4.102 | 0.001   | 0.003 | 0.041 | 0.001 | 0.007 |
| DB02152     | K-252a                                                                              | -4.223  | -2.34  | -0.55  | -3.611 | -5.469 | 0.006   | 0.017 | 0.141 | 0.003 | 0.003 |
| DB08813     | Nadroparin                                                                          | -3.462  | -2.652 | -1.585 | -2.633 | -2.976 | 0.005   | 0.005 | 0.041 | 0.007 | 0.006 |
| DB00890     | Dienestrol                                                                          | -3.298  | -1.215 | -2.438 | -3.191 | -3.256 | 0.003   | 0.06  | 0.011 | 0.002 | 0.005 |
| DB00539     | Toremifene                                                                          | -3.226  | -2.137 | 0.018  | -2.164 | -3.939 | 0.011   | 0.014 | 0.396 | 0.018 | 0.012 |
| DB03963     | S-(Dimethylarsenic)Cysteine                                                         | -3.001  | -1.553 | 0.034  | 0.227  | -3.258 | 0       | 0.056 | 0.148 | 0.415 | 0.001 |
| DB08005     | 4-[[5-chloro-4-(1H-indol-3-yl)pyrimidin-2-yl]amino]-N-ethylpiperidine-1-carboxamide | -2.812  | -1.428 | -1.025 | -3.059 | -3.381 | 0.013   | 0.042 | 0.092 | 0.002 | 0.008 |
| DB04930     | Permethrin                                                                          | -2.671  | -1.119 | -1.013 | -3.732 | -2.511 | 0.011   | 0.085 | 0.074 | 0.004 | 0.012 |
| DB01357     | Mestranol                                                                           | -2.644  | -1.314 | -0.651 | -4.268 | -2.845 | 0.01    | 0.071 | 0.196 | 0.003 | 0.005 |
| DB01744     | Camphor                                                                             | -2.636  | -1.67  | -1.099 | -5.031 | -2.888 | 0.007   | 0.04  | 0.093 | 0.002 | 0.008 |
| DB00286     | Conjugated estrogens                                                                | -2.604  | -1.64  | 0.302  | -4.199 | -2.702 | 0.007   | 0.045 | 0.345 | 0.003 | 0.01  |
| DB02187     | Equilin                                                                             | -2.524  | -2.076 | -0.533 | -4.281 | -3.653 | 0.012   | 0.028 | 0.22  | 0.001 | 0.003 |
| DB00563     | Methotrexate                                                                        | -2.457  | -1.743 | -2.286 | -1.716 | -1.329 | 0.012   | 0.035 | 0.007 | 0.043 | 0.076 |
| DB00544     | Fluorouracil                                                                        | -2.443  | -1.598 | -2.495 | -3.177 | -2.001 | 0.009   | 0.049 | 0.007 | 0.006 | 0.028 |
| DB07931     | Hexestrol                                                                           | -2.443  | -1.291 | -0.333 | -4.18  | -3.1   | 0.008   | 0.067 | 0.288 | 0.002 | 0.006 |
| DB00244     | Mesalazine                                                                          | -2.438  | -2.496 | -0.603 | -0.009 | -1.066 | 0.005   | 0.003 | 0.163 | 0.443 | 0.106 |
| DB01033     | Mercaptopurine                                                                      | -2.437  | -0.753 | -2.796 | -2.549 | -0.47  | 0.02    | 0.164 | 0.001 | 0.012 | 0.248 |
| DB00715     | Paroxetine                                                                          | -2.419  | -1.315 | -1.106 | -1.052 | -1.328 | 0.014   | 0.065 | 0.084 | 0.111 | 0.069 |
| DB00852     | Pseudoephedrine                                                                     | -2.415  | -1.827 | -0.563 | -1.05  | -1.159 | 0.014   | 0.033 | 0.234 | 0.109 | 0.101 |
| DB01769     | 3-sulfinol-L-alanine                                                                | -2.41   | -1.399 | -0.142 | -2.765 | -1.798 | 0.015   | 0.05  | 0.359 | 0.003 | 0.027 |
| DB00614     | Furazolidone                                                                        | -2.389  | -1.677 | -2.532 | -3.48  | -2.115 | 0.01    | 0.029 | 0.008 | 0.011 | 0.015 |
| DB04824     | Phenolphthalein                                                                     | -2.375  | -1.552 | -0.094 | -3.13  | -3.168 | 0.013   | 0.05  | 0.314 | 0.006 | 0.003 |
| DB00877     | Sirolimus                                                                           | -2.354  | -0.9   | 1.807  | -1.041 | -2.253 | 0.006   | 0.158 | 0.959 | 0.105 | 0.015 |
| DB00570     | Vinblastine                                                                         | -2.281  | -1.63  | -0.296 | -2.935 | -1.595 | 0.014   | 0.032 | 0.297 | 0.004 | 0.04  |
| DB00812     | Phenylbutazone                                                                      | -2.25   | -0.596 | 2.416  | -3.053 | -2.945 | 0.02    | 0.174 | 0.99  | 0.004 | 0.005 |
| DB04575     | Quinestrol                                                                          | -2.226  | -1.519 | -0.325 | -4.306 | -2.603 | 0.015   | 0.04  | 0.297 | 0.01  | 0.007 |
| DB04938     | Ospemifene                                                                          | -2.226  | -1.519 | -0.325 | -4.306 | -2.603 | 0.015   | 0.04  | 0.297 | 0.01  | 0.007 |
| DB09092     | Xanthinol                                                                           | -2.226  | -1.519 | -0.325 | -4.306 | -2.603 | 0.015   | 0.04  | 0.297 | 0.01  | 0.007 |
| DB09317     | Synthetic Conjugated Estrogens, A                                                   | -2.226  | -1.519 | -0.325 | -4.306 | -2.603 | 0.015   | 0.04  | 0.297 | 0.01  | 0.007 |
| DB09318     | Synthetic Conjugated Estrogens, B                                                   | -2.226  | -1.519 | -0.325 | -4.306 | -2.603 | 0.015   | 0.04  | 0.297 | 0.01  | 0.007 |
| DB01183     | Naloxone                                                                            | -2.22   | -0.624 | -0.057 | -3.147 | -2.11  | 0.021   | 0.203 | 0.354 | 0.004 | 0.011 |
| DB00242     | Cladribine                                                                          | -2.214  | -0.471 | -2.311 | -2.873 | -1.398 | 0.02    | 0.237 | 0.015 | 0.005 | 0.064 |
| DB02615     | Compound 19                                                                         | -2.204  | -1.202 | -0.866 | -4.336 | -2.812 | 0.016   | 0.071 | 0.101 | 0     | 0.005 |
| DB01275     | Hydralazine                                                                         | -2.203  | -1.334 | -1.919 | -1.127 | -0.4   | 0.013   | 0.071 | 0.021 | 0.094 | 0.264 |
| DB08231     | Myristic acid                                                                       | -2.19   | -2.145 | 1.411  | 0.502  | -2.117 | 0.018   | 0.019 | 0.883 | 0.653 | 0.028 |
| DB00170     | Menadione                                                                           | -2.174  | -0.526 | -1.844 | -0.459 | -0.62  | 0.012   | 0.222 | 0.025 | 0.239 | 0.197 |
| DB01248     | Docetaxel                                                                           | -2.17   | -1.66  | 0.027  | 0.13   | -2.159 | 0.014   | 0.02  | 0.389 | 0.482 | 0.014 |
| DB05465     | Tandutinib                                                                          | -2.11   | -0.494 | -0.661 | -1.587 | -2.228 | 0.02    | 0.231 | 0.214 | 0.041 | 0.015 |
| DB08896     | Regorafenib                                                                         | -2.059  | -0.73  | 0.47   | -0.396 | -3.275 | 0.017   | 0.154 | 0.582 | 0.297 | 0.008 |
| DB08888     | Ocriplasmin                                                                         | -2.038  | -0.885 | 0.652  | -2.752 | -2.986 | 0.032   | 0.12  | 0.43  | 0.008 | 0.005 |
| DB00361     | Vinorelbine                                                                         | -2.028  | -0.664 | -1.699 | -1.879 | -1.45  | 0.02    | 0.132 | 0.031 | 0.025 | 0.052 |
| DB07502     | 4-bromo-6-(6-hydroxy-1,2-benzisoxazol-3-yl)benzene-1,3-diol                         | -2.02   | -1.373 | -0.983 | -3.697 | -1.956 | 0.019   | 0.054 | 0.117 | 0.003 | 0.017 |
| DB06871     | 17-METHYL-17-ALPHA-DIHYDROEQUILENIN                                                 | -2.016  | -1.281 | -0.171 | -4.07  | -2.662 | 0.021   | 0.057 | 0.345 | 0     | 0.008 |
| DB06898     | 4-(2-amino-1-methyl-1H-imidazo[4,5-b]pyridin-6-yl)phenol                            | -2.016  | -1.281 | -0.171 | -4.07  | -2.662 | 0.021   | 0.057 | 0.345 | 0     | 0.008 |

|         |                                                                                                |        |        |        |        |        |       |       |       |       |       |
|---------|------------------------------------------------------------------------------------------------|--------|--------|--------|--------|--------|-------|-------|-------|-------|-------|
| DB07086 | 4-[(1S,2S,5S)-5-(HYDROXYMETHYL)-8-METHYL-3-OXABICYCLO[3.3.1]NON-7-EN-2-YL]PHENOL               | -2.016 | -1.281 | -0.171 | -4.07  | -2.662 | 0.021 | 0.057 | 0.345 | 0     | 0.008 |
| DB07087 | 4-[(1S,2S,5S,9R)-5-(HYDROXYMETHYL)-8,9-DIMETHYL-3-OXABICYCLO[3.3.1]NON-7-EN-2-YL]PHENOL        | -2.016 | -1.281 | -0.171 | -4.07  | -2.662 | 0.021 | 0.057 | 0.345 | 0     | 0.008 |
| DB07195 | 4-[(1S,2S,5S)-5-(HYDROXYMETHYL)-6,8,9-TRIMETHYL-3-OXABICYCLO[3.3.1]NON-7-EN-2-YL]PHENOL        | -2.016 | -1.281 | -0.171 | -4.07  | -2.662 | 0.021 | 0.057 | 0.345 | 0     | 0.008 |
| DB07678 | (9ALPHA,13BETA,17BETA)-2-[(1Z)-BUT-1-EN-1-YL]ESTRA-1,3,5(10)-TRIENE-3,17-DIOL                  | -2.016 | -1.281 | -0.171 | -4.07  | -2.662 | 0.021 | 0.057 | 0.345 | 0     | 0.008 |
| DB07707 | (9BETA,11ALPHA,13ALPHA,14BETA,17ALPHA)-11-(METHOXYMETHYL)ESTRA-1(10),2,4-TRIENE-3,17-DIOL      | -2.016 | -1.281 | -0.171 | -4.07  | -2.662 | 0.021 | 0.057 | 0.345 | 0     | 0.008 |
| DB07708 | 3-CHLORO-2-(4-HYDROXYPHENYL)-2H-INDAZOL-5-OL                                                   | -2.016 | -1.281 | -0.171 | -4.07  | -2.662 | 0.021 | 0.057 | 0.345 | 0     | 0.008 |
| DB07712 | 3-ETHYL-2-(4-HYDROXYPHENYL)-2H-INDAZOL-5-OL                                                    | -2.016 | -1.281 | -0.171 | -4.07  | -2.662 | 0.021 | 0.057 | 0.345 | 0     | 0.008 |
| DB07932 | dimethyl (1R,4S)-5,6-bis(4-hydroxyphenyl)-7-oxabicyclo[2.2.1]hepta-2,5-diene-2,3-dicarboxylate | -2.016 | -1.281 | -0.171 | -4.07  | -2.662 | 0.021 | 0.057 | 0.345 | 0     | 0.008 |
| DB08048 | 4-(6-HYDROXY-1H-INDAZOL-3-YL)BENZENE-1,3-DIOL                                                  | -2.016 | -1.281 | -0.171 | -4.07  | -2.662 | 0.021 | 0.057 | 0.345 | 0     | 0.008 |
| DB08320 | DIETHYL (1R,2S,3R,4S)-5,6-BIS(4-HYDROXYPHENYL)-7-OXABICYCLO[2.2.1]HEPT-5-ENE-2,3-DICARBOXYLATE | -2.016 | -1.281 | -0.171 | -4.07  | -2.662 | 0.021 | 0.057 | 0.345 | 0     | 0.008 |
| DB08398 | 2-Amino-1-methyl-6-phenylimidazo(4,5-b)pyridine                                                | -2.016 | -1.281 | -0.171 | -4.07  | -2.662 | 0.021 | 0.057 | 0.345 | 0     | 0.008 |
| DB08595 | 4-[(1S,2R,5S)-4,4,8-TRIMETHYL-3-OXABICYCLO[3.3.1]NON-7-EN-2-YL]PHENOL                          | -2.016 | -1.281 | -0.171 | -4.07  | -2.662 | 0.021 | 0.057 | 0.345 | 0     | 0.008 |
| DB03909 | Adenosine-5'-[Beta, Gamma-Methylene]Triphosphate                                               | -1.977 | -1.998 | -0.681 | 0.984  | -1.045 | 0.016 | 0.013 | 0.104 | 0.706 | 0.092 |
| DB04967 | Lucanthone                                                                                     | -1.967 | -0.462 | 1.272  | -3.566 | -1.348 | 0.019 | 0.26  | 0.882 | 0     | 0.063 |
| DB01136 | Carvedilol                                                                                     | -1.944 | -1.16  | 0.338  | -0.943 | -1.153 | 0.023 | 0.097 | 0.548 | 0.109 | 0.074 |
| DB02513 | Thymol                                                                                         | -1.926 | -1.821 | -1.283 | -1.915 | -1.948 | 0.001 | 0.011 | 0.128 | 0.003 | 0.001 |
| DB01394 | Colchicine                                                                                     | -1.919 | -1.583 | -1.525 | -2.157 | -1.53  | 0.027 | 0.034 | 0.043 | 0.016 | 0.05  |
| DB00431 | Lindane                                                                                        | -1.917 | -1.553 | -0.284 | -3.128 | -2.083 | 0.018 | 0.056 | 0.27  | 0.002 | 0.017 |
| DB00098 | Antithymocyte immunoglobulin (rabbit)                                                          | -1.911 | 1.204  | -3.221 | -2.34  | -1.439 | 0.016 | 0.851 | 0.002 | 0.012 | 0.053 |
| DB00321 | Amitriptyline                                                                                  | -1.89  | -0.179 | 1.483  | 1.131  | -2.334 | 0.03  | 0.336 | 0.918 | 0.87  | 0.022 |
| DB00668 | Epinephrine                                                                                    | -1.88  | -1.024 | -0.093 | -0.995 | -1.616 | 0.031 | 0.142 | 0.529 | 0.132 | 0.055 |
| DB00970 | Dactinomycin                                                                                   | -1.879 | -1.529 | 0.651  | -2.826 | -0.699 | 0.027 | 0.035 | 0.444 | 0.003 | 0.155 |
| DB07886 | Hydrocortisone                                                                                 | -1.876 | -1.789 | 0.208  | -0.722 | -2.04  | 0.013 | 0.01  | 0.189 | 0.165 | 0.01  |
| DB00294 | Etonogestrel                                                                                   | -1.821 | -0.87  | -0.77  | -3.368 | -2.358 | 0.023 | 0.129 | 0.167 | 0.004 | 0.013 |
| DB00304 | Desogestrel                                                                                    | -1.821 | -0.87  | -0.77  | -3.368 | -2.358 | 0.023 | 0.129 | 0.167 | 0.004 | 0.013 |
| DB02538 | N-[4-(2-Methylimidazo[1,2-a]Pyridin-3-Yl)-2-Pyrimidinyl]Acetamide                              | -1.769 | -1.216 | 0.024  | -2.264 | -2.202 | 0.027 | 0.057 | 0.427 | 0.011 | 0.016 |
| DB04006 | [2-Amino-6-(2,6-Difluoro-Benzoyl)-Imidazo[1,2-a]Pyridin-3-Yl]-Phenyl-Methanone                 | -1.769 | -1.216 | 0.024  | -2.264 | -2.202 | 0.027 | 0.057 | 0.427 | 0.011 | 0.016 |
| DB04518 | 3-[4-(2,4-Dimethyl-Thiazol-5-Yl)-Pyrimidin-2-Ylamino]-Phenol                                   | -1.769 | -1.216 | 0.024  | -2.264 | -2.202 | 0.027 | 0.057 | 0.427 | 0.011 | 0.016 |

|         |                                                                                                               |        |        |        |        |        |       |       |       |       |       |
|---------|---------------------------------------------------------------------------------------------------------------|--------|--------|--------|--------|--------|-------|-------|-------|-------|-------|
| DB07790 | N-(2-METHOXYETHYL)-4-({4-[2-METHYL-1-(1-METHYLETHYL)-1H-IMIDAZOL-5-YL]PYRIMIDIN-2-YL}AMINO)BENZENESULFONAMIDE | -1.769 | -1.216 | 0.024  | -2.264 | -2.202 | 0.027 | 0.057 | 0.427 | 0.011 | 0.016 |
| DB08285 | (2R)-2-{{4-(benzylamino)-8-(1-methylethyl)pyrazolo[1,5-a][1,3,5]triazin-2-yl}amino)butan-1-ol                 | -1.766 | -0.75  | -1.268 | -2.488 | -1.104 | 0.027 | 0.159 | 0.061 | 0.006 | 0.085 |
| DB00714 | Apomorphine                                                                                                   | -1.737 | -1.352 | 0.559  | 0.35   | -0.632 | 0.033 | 0.065 | 0.647 | 0.59  | 0.202 |
| DB01420 | Testosterone propionate                                                                                       | -1.736 | -0.619 | -0.939 | -3.533 | -1.653 | 0.027 | 0.178 | 0.123 | 0.004 | 0.035 |
| DB01065 | Melatonin                                                                                                     | -1.72  | -1.423 | -0.002 | -1.182 | -1.422 | 0.029 | 0.056 | 0.4   | 0.103 | 0.058 |
| DB06710 | Methyltestosterone                                                                                            | -1.706 | -0.877 | -1.222 | -3.214 | -1.943 | 0.024 | 0.119 | 0.07  | 0.002 | 0.02  |
| DB00108 | Natalizumab                                                                                                   | -1.692 | -0.45  | 0.736  | -3.471 | -1.654 | 0.034 | 0.216 | 0.653 | 0     | 0.044 |
| DB00947 | Fulvestrant                                                                                                   | -1.671 | -0.497 | -0.991 | -2.337 | -2.578 | 0.031 | 0.22  | 0.105 | 0.01  | 0.009 |
| DB08900 | Teduglutide                                                                                                   | -1.656 | -1.58  | -1.436 | -1.742 | -1.847 | 0.004 | 0.044 | 0.085 | 0.007 | 0.002 |
| DB00338 | Omeprazole                                                                                                    | -1.652 | -0.599 | 1.045  | -0.394 | -0.525 | 0.031 | 0.23  | 0.767 | 0.279 | 0.26  |
| DB00367 | Levonorgestrel                                                                                                | -1.635 | -0.486 | -1.269 | -3.168 | -1.901 | 0.025 | 0.191 | 0.068 | 0.003 | 0.021 |
| DB06287 | Temsirolimus                                                                                                  | -1.623 | -0.383 | 0.159  | -0.806 | -1.277 | 0.043 | 0.314 | 0.202 | 0.156 | 0.069 |
| DB01103 | Quinacrine                                                                                                    | -1.62  | -0.526 | -0.089 | -0.723 | -0.726 | 0.044 | 0.241 | 0.378 | 0.173 | 0.188 |
| DB06782 | Dimercaprol                                                                                                   | -1.603 | -0.976 | -1.473 | -0.787 | -1.403 | 0.041 | 0.09  | 0.056 | 0.161 | 0.035 |
| DB00624 | Testosterone                                                                                                  | -1.602 | -0.875 | -1.498 | -2.498 | -1.825 | 0.035 | 0.128 | 0.043 | 0.01  | 0.031 |
| DB06822 | Tinzaparin                                                                                                    | -1.602 | 0.092  | -1.135 | -3.614 | -2.424 | 0.043 | 0.449 | 0.058 | 0.004 | 0.011 |
| DB00700 | Eplerenone                                                                                                    | -1.588 | -1.176 | 0.063  | -0.933 | -1.76  | 0.028 | 0.08  | 0.179 | 0.118 | 0.015 |
| DB01427 | Amrinone                                                                                                      | -1.583 | -1.261 | -1.288 | -0.075 | -0.859 | 0.05  | 0.095 | 0.073 | 0.444 | 0.162 |
| DB00162 | Vitamin A                                                                                                     | -1.58  | -0.65  | -0.384 | -1.741 | -1.297 | 0.045 | 0.163 | 0.27  | 0.033 | 0.072 |
| DB09148 | Florbetaben (18F)                                                                                             | -1.578 | -1.519 | -0.325 | -1.828 | -1.872 | 0.034 | 0.04  | 0.297 | 0.024 | 0.02  |
| DB09149 | Florbetapir (18F)                                                                                             | -1.578 | -1.519 | -0.325 | -1.828 | -1.872 | 0.034 | 0.04  | 0.297 | 0.024 | 0.02  |
| DB09151 | Flutemetamol (18F)                                                                                            | -1.578 | -1.519 | -0.325 | -1.828 | -1.872 | 0.034 | 0.04  | 0.297 | 0.024 | 0.02  |
| DB02091 | 4-(2,4-Dimethyl-Thiazol-5-Yl)-Pyrimidin-2-Ylamine                                                             | -1.57  | -0.882 | -1.694 | -2.361 | -2.01  | 0.044 | 0.119 | 0.028 | 0.009 | 0.02  |
| DB02915 | 4-(2,4-Dimethyl-1,3-thiazol-5-yl)-N-[4-(trifluoromethyl)phenyl]-2-pyrimidinamine                              | -1.57  | -0.882 | -1.694 | -2.361 | -2.01  | 0.044 | 0.119 | 0.028 | 0.009 | 0.02  |
| DB06844 | 4-[(7-OXO-7H-THIAZOLO[5,4-E]INDOL-8-YLMETHYL)-AMINO]-N-PYRIDIN-2-YL-BENZENESULFONAMIDE                        | -1.57  | -0.882 | -1.694 | -2.361 | -2.01  | 0.044 | 0.119 | 0.028 | 0.009 | 0.02  |
| DB06948 | 2-ANILINO-6-CYCLOHEXYLMETHOXPURINE                                                                            | -1.57  | -0.882 | -1.694 | -2.361 | -2.01  | 0.044 | 0.119 | 0.028 | 0.009 | 0.02  |
| DB07137 | (2S)-N-[(3Z)-5-CYCLOPROPYL-3H-PYRAZOL-3-YLIDENE]-2-[4-(2-OXOIMIDAZOLIDIN-1-YL)PHENYL]PROPANAMIDE              | -1.57  | -0.882 | -1.694 | -2.361 | -2.01  | 0.044 | 0.119 | 0.028 | 0.009 | 0.02  |
| DB07203 | 6-CYCLOHEXYLMETHOXY-2-(3'-CHLOROANILINO) PURINE                                                               | -1.57  | -0.882 | -1.694 | -2.361 | -2.01  | 0.044 | 0.119 | 0.028 | 0.009 | 0.02  |
| DB07539 | 4-{5-[(Z)-(2-IMINO-4-OXO-1,3-THIAZOLIDIN-5-YLIDENE)METHYL]FURAN-2-YL}BENZOIC ACID                             | -1.57  | -0.882 | -1.694 | -2.361 | -2.01  | 0.044 | 0.119 | 0.028 | 0.009 | 0.02  |
| DB07852 | 1-(3,5-DICHLOROPHENYL)-5-METHYL-1H-1,2,4-TRIAZOLE-3-CARBOXYLIC ACID                                           | -1.57  | -0.882 | -1.694 | -2.361 | -2.01  | 0.044 | 0.119 | 0.028 | 0.009 | 0.02  |
| DB08178 | 4-(4-methoxy-1H-pyrrolo[2,3-b]pyridin-3-yl)pyrimidin-2-amine                                                  | -1.57  | -0.882 | -1.694 | -2.361 | -2.01  | 0.044 | 0.119 | 0.028 | 0.009 | 0.02  |
| DB08182 | 4-(4-propoxy-1H-pyrrolo[2,3-b]pyridin-3-yl)pyrimidin-2-amine                                                  | -1.57  | -0.882 | -1.694 | -2.361 | -2.01  | 0.044 | 0.119 | 0.028 | 0.009 | 0.02  |

|         |                                                                                                                  |        |        |        |        |        |       |       |       |       |       |
|---------|------------------------------------------------------------------------------------------------------------------|--------|--------|--------|--------|--------|-------|-------|-------|-------|-------|
| DB08218 | HYDROXY(OXO)(3-{{(2Z)-4-[3-(1H-1,2,4-TRIAZOL-1-YLMETHYL)PHENYL]PYRIMIDIN-2(5H)-YLIDENE}AMINO}PHENYL)AMMONIUM     | -1.57  | -0.882 | -1.694 | -2.361 | -2.01  | 0.044 | 0.119 | 0.028 | 0.009 | 0.02  |
| DB08219 | 4-METHYL-5-{{(2E)-2-[(4-MORPHOLIN-4-YLPHENYL)IMINO]-2,5-DIHYDROPYRIMIDIN-4-YL}-1,3-THIAZOL-2-AMINE               | -1.57  | -0.882 | -1.694 | -2.361 | -2.01  | 0.044 | 0.119 | 0.028 | 0.009 | 0.02  |
| DB08233 | 6-CYCLOHEXYLMETHYLOXY-2-(4'-HYDROXYANILINO)PURINE                                                                | -1.57  | -0.882 | -1.694 | -2.361 | -2.01  | 0.044 | 0.119 | 0.028 | 0.009 | 0.02  |
| DB08241 | 4-(6-CYCLOHEXYLMETHOXY-9H-PURIN-2-YLAMINO)--BENZAMIDE                                                            | -1.57  | -0.882 | -1.694 | -2.361 | -2.01  | 0.044 | 0.119 | 0.028 | 0.009 | 0.02  |
| DB08248 | 3-(6-CYCLOHEXYLMETHOXY-9H-PURIN-2-YLAMINO)-BENZENESULFONAMIDE                                                    | -1.57  | -0.882 | -1.694 | -2.361 | -2.01  | 0.044 | 0.119 | 0.028 | 0.009 | 0.02  |
| DB08527 | 1-[4-(AMINOSULFONYL)PHENYL]-1,6-DIHYDROPYRAZOLO[3,4-E]INDAZOLE-3-CARBOXAMIDE                                     | -1.57  | -0.882 | -1.694 | -2.361 | -2.01  | 0.044 | 0.119 | 0.028 | 0.009 | 0.02  |
| DB01370 | Aluminium                                                                                                        | -1.565 | -1.071 | 0.319  | -0.894 | -1.555 | 0.042 | 0.077 | 0.401 | 0.133 | 0.047 |
| DB02197 | 4-[(4-Imidazo[1,2-a]Pyridin-3-Ylpyrimidin-2-Yl)Amino]Benzenesulfonamide                                          | -1.56  | -1.094 | -0.171 | -2.348 | -2.061 | 0.042 | 0.083 | 0.345 | 0.01  | 0.017 |
| DB00269 | Chlorotrianisene                                                                                                 | -1.553 | -0.532 | -0.983 | -2.922 | -2.234 | 0.047 | 0.184 | 0.117 | 0.01  | 0.012 |
| DB01878 | Benzophenone                                                                                                     | -1.553 | -0.532 | -0.983 | -2.922 | -2.234 | 0.047 | 0.184 | 0.117 | 0.01  | 0.012 |
| DB04020 | 4-(2-[[4-{{[3-(4-Chlorophenyl)Propyl]Sulfanyl}-6-(1-Piperazinyl)-1,3,5-Triazin-2-Yl]Amino}Ethyl]Phenol           | -1.553 | -0.532 | -0.983 | -2.922 | -2.234 | 0.047 | 0.184 | 0.117 | 0.01  | 0.012 |
| DB05414 | Pipendoxifene                                                                                                    | -1.553 | -0.532 | -0.983 | -2.922 | -2.234 | 0.047 | 0.184 | 0.117 | 0.01  | 0.012 |
| DB06401 | Bazedoxifene                                                                                                     | -1.553 | -0.532 | -0.983 | -2.922 | -2.234 | 0.047 | 0.184 | 0.117 | 0.01  | 0.012 |
| DB06937 | 4-(6-HYDROXY-BENZO[D]ISOXAZOL-3-YL)BENZENE-1,3-DIOL                                                              | -1.553 | -0.532 | -0.983 | -2.922 | -2.234 | 0.047 | 0.184 | 0.117 | 0.01  | 0.012 |
| DB07036 | (3aS,4R,9bR)-2,2-difluoro-4-(4-hydroxyphenyl)-6-(methoxymethyl)-1,2,3,3a,4,9b-hexahydrocyclopenta[c]chromen-8-ol | -1.553 | -0.532 | -0.983 | -2.922 | -2.234 | 0.047 | 0.184 | 0.117 | 0.01  | 0.012 |
| DB07567 | (2R,3R,4S)-3-(4-HYDROXYPHENYL)-4-METHYL-2-[4-(2-PYRROLIDIN-1-YLETHOXY)PHENYL]CHROMAN-6-OL                        | -1.553 | -0.532 | -0.983 | -2.922 | -2.234 | 0.047 | 0.184 | 0.117 | 0.01  | 0.012 |
| DB07638 | (3AS,4R,9BR)-2,2-DIFLUORO-4-(4-HYDROXYPHENYL)-1,2,3,3A,4,9B-HEXAHYDROCYCLOPENTA[C]CHROMEN-8-OL                   | -1.553 | -0.532 | -0.983 | -2.922 | -2.234 | 0.047 | 0.184 | 0.117 | 0.01  | 0.012 |
| DB07757 | (9aS)-4-bromo-9a-butyl-7-hydroxy-1,2,9,9a-tetrahydro-3H-fluoren-3-one                                            | -1.553 | -0.532 | -0.983 | -2.922 | -2.234 | 0.047 | 0.184 | 0.117 | 0.01  | 0.012 |
| DB07933 | Erteberel                                                                                                        | -1.553 | -0.532 | -0.983 | -2.922 | -2.234 | 0.047 | 0.184 | 0.117 | 0.01  | 0.012 |
| DB07991 | N-[(1R)-3-(4-HYDROXYPHENYL)-1-METHYLPROPYL]-2-(2-PHENYL-1H-INDOL-3-YL)ACETAMIDE                                  | -1.553 | -0.532 | -0.983 | -2.922 | -2.234 | 0.047 | 0.184 | 0.117 | 0.01  | 0.012 |
| DB08020 | (3AS,4R,9BR)-4-(4-HYDROXYPHENYL)-6-(METHOXYMETHYL)-1,2,3,3A,4,9B-HEXAHYDROCYCLOPENTA[C]CHROMEN-8-OL              | -1.553 | -0.532 | -0.983 | -2.922 | -2.234 | 0.047 | 0.184 | 0.117 | 0.01  | 0.012 |

|         |                                                                                                                                |        |        |        |        |        |       |       |       |       |       |
|---------|--------------------------------------------------------------------------------------------------------------------------------|--------|--------|--------|--------|--------|-------|-------|-------|-------|-------|
| DB08737 | (3AS,4R,9BR)-4-(4-HYDROXYPHENYL)-1,2,3,3A,4,9B-HEXAHYDROCYCLOPENTA[C]CHROMEN-9-OL                                              | -1.553 | -0.532 | -0.983 | -2.922 | -2.234 | 0.047 | 0.184 | 0.117 | 0.01  | 0.012 |
| DB09535 | Octocrylene                                                                                                                    | -1.553 | -0.532 | -0.983 | -2.922 | -2.234 | 0.047 | 0.184 | 0.117 | 0.01  | 0.012 |
| DB07715 | Emodin                                                                                                                         | -1.537 | -0.291 | -1.986 | -2.183 | -1.745 | 0.035 | 0.268 | 0.023 | 0.016 | 0.029 |
| DB00851 | Dacarbazine                                                                                                                    | -1.53  | -0.798 | -0.147 | -1.119 | -0.408 | 0.036 | 0.171 | 0.125 | 0.08  | 0.259 |
| DB06412 | Oxymetholone                                                                                                                   | -1.526 | -0.069 | -2.646 | -3.399 | -1.196 | 0.041 | 0.354 | 0.006 | 0.007 | 0.059 |
| DB00396 | Progesterone                                                                                                                   | -1.525 | -0.896 | 0.441  | -1.028 | -1.524 | 0.034 | 0.113 | 0.57  | 0.117 | 0.051 |
| DB07471 | 5-[5,6-BIS(METHYLOXY)-1H-BENZIMIDAZOL-1-YL]-3-[[1-(2-CHLOROPHENYL)ETHYL]OXY]-2-THIOPHENECARBOXAMIDE                            | -1.521 | -1.423 | -0.867 | -1.573 | -0.51  | 0.036 | 0.04  | 0.143 | 0.04  | 0.202 |
| DB02901 | Stanolone                                                                                                                      | -1.516 | -0.434 | -1.395 | -2.901 | -1.55  | 0.043 | 0.226 | 0.06  | 0.006 | 0.037 |
| DB03801 | Lysine Nz-Carboxylic Acid                                                                                                      | -1.509 | -0.669 | -0.304 | -2.857 | -2.39  | 0.04  | 0.163 | 0.307 | 0.005 | 0.013 |
| DB00808 | Indapamide                                                                                                                     | -1.506 | -0.681 | 1.124  | -0.658 | -1.131 | 0.055 | 0.199 | 0.808 | 0.174 | 0.104 |
| DB08683 | REL-(9R,12S)-9,10,11,12-TETRAHYDRO-9,12-EPOXY-1H-DIINDOLO[1,2,3-FG:3',2',1'-KL]PYRROLO[3,4-I][1,6]BENZODIAZOCINE-1,3(2H)-DIONE | -1.506 | -0.836 | 0.291  | -2.352 | -2.036 | 0.045 | 0.137 | 0.548 | 0.011 | 0.019 |
| DB09257 | Gimeracil                                                                                                                      | -1.501 | -1.369 | -1.157 | -1.418 | -1.685 | 0.009 | 0.106 | 0.102 | 0.016 | 0.002 |
| DB01169 | Arsenic trioxide                                                                                                               | -1.492 | -1.212 | -1.406 | -2.131 | -0.943 | 0.04  | 0.056 | 0.062 | 0.005 | 0.123 |
| DB02709 | Resveratrol                                                                                                                    | -1.492 | -0.995 | -0.037 | -2.178 | -1.589 | 0.034 | 0.089 | 0.403 | 0.022 | 0.043 |
| DB04224 | Oleic Acid                                                                                                                     | -1.488 | -0.897 | 1.589  | -1.503 | 0.01   | 0.06  | 0.158 | 0.921 | 0.053 | 0.44  |
| DB04407 | 4-[4-(4-Methyl-2-Methylamino-Thiazol-5-Yl)-Pyrimidin-2-Ylamino]-Phenol                                                         | -1.477 | -1.896 | -0.052 | -1.452 | -0.773 | 0.034 | 0.021 | 0.295 | 0.046 | 0.113 |
| DB04574 | Estrone sulfate                                                                                                                | -1.475 | -0.52  | -1.047 | -3.255 | -1.762 | 0.037 | 0.212 | 0.103 | 0.005 | 0.025 |
| DB00746 | Deferoxamine                                                                                                                   | -1.473 | -0.946 | -1.87  | -1.388 | -1.618 | 0.046 | 0.102 | 0.032 | 0.077 | 0.032 |
| DB07485 | 4,4'-cyclohexane-1,1-diylidiphenol                                                                                             | -1.473 | -0.604 | -0.889 | -2.619 | -2.056 | 0.041 | 0.169 | 0.137 | 0.011 | 0.014 |
| DB00337 | Pimecrolimus                                                                                                                   | -1.463 | -0.7   | 0.274  | -0.032 | -0.948 | 0.058 | 0.202 | 0.394 | 0.383 | 0.125 |
| DB00389 | Carbimazole                                                                                                                    | -1.459 | -1.276 | -0.671 | -1.335 | -1.546 | 0.016 | 0.13  | 0.291 | 0.064 | 0.004 |
| DB00984 | Nandrolone phenpropionate                                                                                                      | -1.459 | -0.364 | -0.983 | -3.697 | -1.956 | 0.052 | 0.247 | 0.117 | 0.003 | 0.017 |
| DB07558 | acetylleucyl-leucyl-norleucinal                                                                                                | -1.458 | -1.002 | 0.083  | -0.314 | -0.492 | 0.04  | 0.122 | 0.136 | 0.305 | 0.236 |
| DB02235 | L-methionine (R)-S-oxide                                                                                                       | -1.456 | -1.37  | -0.226 | -1.557 | -1.57  | 0.049 | 0.076 | 0.329 | 0.045 | 0.03  |
| DB06714 | Propylhexedrine                                                                                                                | -1.449 | -1.369 | -0.778 | -1.418 | -1.607 | 0.03  | 0.106 | 0.258 | 0.016 | 0.007 |
| DB00288 | Amcinonide                                                                                                                     | -1.448 | -1.056 | 0.262  | -0.899 | -1.733 | 0.046 | 0.12  | 0.21  | 0.112 | 0.016 |
| DB00850 | Perphenazine                                                                                                                   | -1.44  | -1.082 | 1.125  | 0.002  | -1.069 | 0.044 | 0.081 | 0.821 | 0.426 | 0.093 |
| DB01380 | Cortisone acetate                                                                                                              | -1.439 | -1.328 | 0.863  | -0.258 | -1.885 | 0.062 | 0.066 | 0.689 | 0.312 | 0.023 |
| DB07460 | 2-((5-CHLORO-2-[(2-METHOXY-4-MORPHOLIN-4-YLPHENYL)AMINO]PYRIMIDIN-4-YL)AMINO)-N-METHYLBENZAMIDE                                | -1.435 | -0.768 | 0.338  | -0.519 | -0.724 | 0.058 | 0.166 | 0.236 | 0.226 | 0.173 |
| DB00305 | Mitomycin                                                                                                                      | -1.434 | -1.416 | -0.78  | -1.445 | -1.62  | 0.013 | 0.054 | 0.264 | 0.014 | 0.008 |
| DB04205 | Thymidine-3',5'-Diphosphate                                                                                                    | -1.432 | -0.085 | -0.167 | -3.193 | -1.503 | 0.031 | 0.431 | 0.103 | 0     | 0.036 |
| DB06202 | Lasofloxifene                                                                                                                  | -1.426 | -0.618 | -0.575 | -2.584 | -1.784 | 0.044 | 0.214 | 0.178 | 0.01  | 0.023 |
| DB00061 | Pegademase                                                                                                                     | -1.416 | -1.519 | 0.411  | -1.828 | -1.385 | 0.049 | 0.04  | 0.328 | 0.024 | 0.043 |
| DB00717 | Norethisterone                                                                                                                 | -1.416 | -0.477 | -1.034 | -2.881 | -1.945 | 0.048 | 0.204 | 0.102 | 0.004 | 0.023 |
| DB09495 | Avobenzone                                                                                                                     | -1.41  | -1.37  | -0.78  | -1.445 | -1.62  | 0.02  | 0.093 | 0.264 | 0.014 | 0.008 |
| DB00864 | Tacrolimus                                                                                                                     | -1.408 | -2.018 | -0.16  | 1.039  | 1.25   | 0.062 | 0.016 | 0.291 | 0.806 | 0.875 |
| DB00945 | Acetylsalicylic acid                                                                                                           | -1.406 | -0.708 | -0.885 | -1.646 | -0.966 | 0.044 | 0.155 | 0.147 | 0.04  | 0.119 |
| DB06718 | Stanozolol                                                                                                                     | -1.405 | -0.039 | -0.352 | -3.335 | -1.782 | 0.049 | 0.384 | 0.253 | 0.006 | 0.022 |
| DB01366 | Procaterol                                                                                                                     | -1.4   | -0.56  | -1.099 | 0.295  | -1.629 | 0.058 | 0.235 | 0.06  | 0.531 | 0.027 |
| DB03428 | SU9516                                                                                                                         | -1.395 | -0.717 | -1.114 | -1.636 | -1.091 | 0.049 | 0.16  | 0.088 | 0.029 | 0.069 |
| DB08355 | 1-methyl-8-(phenylamino)-4,5-dihydro-1H-pyrazolo[4,3-h]quinazoline-3-carboxylic acid                                           | -1.393 | -0.913 | -0.356 | -1.511 | -0.67  | 0.051 | 0.111 | 0.262 | 0.04  | 0.154 |

|         |                                                                                                                                                                         |        |        |        |        |        |       |       |       |       |       |
|---------|-------------------------------------------------------------------------------------------------------------------------------------------------------------------------|--------|--------|--------|--------|--------|-------|-------|-------|-------|-------|
| DB01915 | S-Hydroxycysteine                                                                                                                                                       | -1.383 | -2.236 | 2.471  | -0.81  | -0.189 | 0.064 | 0.011 | 0.981 | 0.152 | 0.351 |
| DB01259 | Lapatinib                                                                                                                                                               | -1.373 | -0.84  | 0.036  | -0.863 | -1.264 | 0.041 | 0.139 | 0.428 | 0.147 | 0.077 |
| DB00005 | Etanercept                                                                                                                                                              | -1.36  | -1.561 | -0.398 | -0.053 | 0.023  | 0.072 | 0.052 | 0.2   | 0.391 | 0.423 |
| DB11581 | Venetoclax                                                                                                                                                              | -1.358 | -1.097 | 0.165  | -1.14  | 0.186  | 0.055 | 0.104 | 0.183 | 0.076 | 0.479 |
| DB00522 | Bentiromide                                                                                                                                                             | -1.348 | -1.132 | -0.951 | -1.204 | -1.543 | 0.007 | 0.122 | 0.146 | 0.026 | 0.002 |
| DB00535 | Cefdinir                                                                                                                                                                | -1.348 | -0.534 | 1.894  | -3.152 | -2.296 | 0.052 | 0.191 | 0.978 | 0.006 | 0.014 |
| DB08361 | 2-(((1R,2S)-2-aminocyclohexyl)amino)-4-<br>[(3-methylphenyl)amino]pyrimidine-5-<br>carboxamide                                                                          | -1.347 | -1.831 | -1.031 | 0.115  | 0.043  | 0.064 | 0.023 | 0.073 | 0.455 | 0.452 |
| DB09063 | Ceritinib                                                                                                                                                               | -1.343 | -0.842 | 0.663  | 0.55   | -1.646 | 0.05  | 0.129 | 0.679 | 0.662 | 0.052 |
| DB04794 | Bifonazole                                                                                                                                                              | -1.33  | -0.367 | -0.944 | -2.62  | -1.23  | 0.061 | 0.263 | 0.092 | 0.005 | 0.053 |
| DB07592 | (2R)-3-Methyl-1-phenyl-2-butanyl [(2S)-1-<br>oxo-2-hexanyl]carbamate                                                                                                    | -1.329 | -0.131 | 0.515  | -2.435 | -0.617 | 0.051 | 0.382 | 0.549 | 0.009 | 0.192 |
| DB07164 | N-cyclopropyl-4-pyrazolo[1,5-b]pyridazin-<br>3-ylpyrimidin-2-amine                                                                                                      | -1.327 | -0.909 | -0.542 | -1.132 | -1.057 | 0.052 | 0.106 | 0.222 | 0.085 | 0.067 |
| DB00002 | Cetuximab                                                                                                                                                               | -1.326 | -1.038 | 0.504  | -0.39  | -1.032 | 0.06  | 0.104 | 0.552 | 0.259 | 0.097 |
| DB01493 | Ethylestrenol                                                                                                                                                           | -1.324 | 0.092  | -0.974 | -3.229 | -1.598 | 0.062 | 0.464 | 0.108 | 0.004 | 0.039 |
| DB01406 | Danazol                                                                                                                                                                 | -1.322 | -0.362 | 0.779  | -0.966 | -1.629 | 0.064 | 0.275 | 0.726 | 0.128 | 0.038 |
| DB09042 | Tedizolid phosphate                                                                                                                                                     | -1.321 | -1.132 | -0.563 | -1.204 | -1.543 | 0.013 | 0.122 | 0.335 | 0.026 | 0.002 |
| DB09244 | Pirlindole                                                                                                                                                              | -1.321 | -1.132 | -0.563 | -1.204 | -1.543 | 0.013 | 0.122 | 0.335 | 0.026 | 0.002 |
| DB00957 | Norgestimate                                                                                                                                                            | -1.319 | -0.461 | -0.79  | -3.706 | -1.503 | 0.054 | 0.243 | 0.158 | 0.004 | 0.036 |
| DB01431 | Allylestrenol                                                                                                                                                           | -1.319 | -0.461 | -0.79  | -3.706 | -1.503 | 0.054 | 0.243 | 0.158 | 0.004 | 0.036 |
| DB11064 | Homosalate                                                                                                                                                              | -1.319 | -0.461 | -0.79  | -3.706 | -1.503 | 0.054 | 0.243 | 0.158 | 0.004 | 0.036 |
| DB03796 | Palmitic Acid                                                                                                                                                           | -1.313 | -0.691 | 0.613  | 1.082  | -1.553 | 0.083 | 0.198 | 0.604 | 0.781 | 0.051 |
| DB00749 | Etodolac                                                                                                                                                                | -1.3   | -0.474 | 1.566  | -2.424 | -0.604 | 0.06  | 0.248 | 0.905 | 0.005 | 0.186 |
| DB00472 | Fluoxetine                                                                                                                                                              | -1.297 | -0.208 | -1.008 | -0.07  | -0.98  | 0.06  | 0.337 | 0.119 | 0.399 | 0.119 |
| DB09070 | Tibolone                                                                                                                                                                | -1.29  | -0.238 | -0.047 | -2.777 | -1.654 | 0.049 | 0.291 | 0.377 | 0.007 | 0.036 |
| DB09033 | Vedolizumab                                                                                                                                                             | -1.28  | -0.198 | 1.184  | -3.826 | -2.612 | 0.056 | 0.33  | 0.849 | 0     | 0.009 |
| DB01718 | Cetrimonium                                                                                                                                                             | -1.278 | -0.651 | -1.312 | -2.493 | -0.975 | 0.054 | 0.165 | 0.075 | 0.008 | 0.111 |
| DB00348 | Nitisinone                                                                                                                                                              | -1.276 | -1.232 | -0.664 | -1.415 | -1.525 | 0.037 | 0.132 | 0.284 | 0.011 | 0.008 |
| DB00719 | Azatadine                                                                                                                                                               | -1.276 | -1.232 | -0.664 | -1.415 | -1.525 | 0.037 | 0.132 | 0.284 | 0.011 | 0.008 |
| DB00748 | Carbinoxamine                                                                                                                                                           | -1.276 | -1.232 | -0.664 | -1.415 | -1.525 | 0.037 | 0.132 | 0.284 | 0.011 | 0.008 |
| DB00792 | Tripelennamine                                                                                                                                                          | -1.276 | -1.232 | -0.664 | -1.415 | -1.525 | 0.037 | 0.132 | 0.284 | 0.011 | 0.008 |
| DB00902 | Methdilazine                                                                                                                                                            | -1.276 | -1.232 | -0.664 | -1.415 | -1.525 | 0.037 | 0.132 | 0.284 | 0.011 | 0.008 |
| DB01084 | Emedastine                                                                                                                                                              | -1.276 | -1.232 | -0.664 | -1.415 | -1.525 | 0.037 | 0.132 | 0.284 | 0.011 | 0.008 |
| DB01237 | Bromodiphenhydramine                                                                                                                                                    | -1.276 | -1.232 | -0.664 | -1.415 | -1.525 | 0.037 | 0.132 | 0.284 | 0.011 | 0.008 |
| DB01615 | Aceprometazine                                                                                                                                                          | -1.276 | -1.232 | -0.664 | -1.415 | -1.525 | 0.037 | 0.132 | 0.284 | 0.011 | 0.008 |
| DB01619 | Phenindamine                                                                                                                                                            | -1.276 | -1.232 | -0.664 | -1.415 | -1.525 | 0.037 | 0.132 | 0.284 | 0.011 | 0.008 |
| DB04837 | Clofedanol                                                                                                                                                              | -1.276 | -1.232 | -0.664 | -1.415 | -1.525 | 0.037 | 0.132 | 0.284 | 0.011 | 0.008 |
| DB04890 | Bepotastine                                                                                                                                                             | -1.276 | -1.232 | -0.664 | -1.415 | -1.525 | 0.037 | 0.132 | 0.284 | 0.011 | 0.008 |
| DB06282 | Levocetirizine                                                                                                                                                          | -1.276 | -1.232 | -0.664 | -1.415 | -1.525 | 0.037 | 0.132 | 0.284 | 0.011 | 0.008 |
| DB06766 | Alcaftadine                                                                                                                                                             | -1.276 | -1.232 | -0.664 | -1.415 | -1.525 | 0.037 | 0.132 | 0.284 | 0.011 | 0.008 |
| DB08802 | Isothipendyl                                                                                                                                                            | -1.276 | -1.232 | -0.664 | -1.415 | -1.525 | 0.037 | 0.132 | 0.284 | 0.011 | 0.008 |
| DB09555 | Dexchlorpheniramine maleate                                                                                                                                             | -1.276 | -1.232 | -0.664 | -1.415 | -1.525 | 0.037 | 0.132 | 0.284 | 0.011 | 0.008 |
| DB11591 | Bilastine                                                                                                                                                               | -1.276 | -1.232 | -0.664 | -1.415 | -1.525 | 0.037 | 0.132 | 0.284 | 0.011 | 0.008 |
| DB06888 | (13R,15S)-13-METHYL-16-OXA-<br>8,9,12,22,24-<br>PENTAAZAHEXACYCLO[15.6.2.16,9.1,12,1<br>5.0,2,7.0,21,25]HEPTACOSA-<br>1(24),2,4,6,17(25),18,20-HEPTAENE-23,26-<br>DIONE | -1.272 | -0.869 | 0.265  | -1.759 | -1.678 | 0.066 | 0.111 | 0.525 | 0.028 | 0.029 |
| DB07540 | 4-{5-[(1Z)-1-(2-IMINO-4-OXO-1,3-<br>THIAZOLIDIN-5-YLIDENE)ETHYL]-2-<br>FURYL}BENZENESULFONAMIDE                                                                         | -1.272 | -0.869 | 0.265  | -1.759 | -1.678 | 0.066 | 0.111 | 0.525 | 0.028 | 0.029 |
| DB07686 | 4-[[5-<br>(CYCLOHEXYLAMINO)[1,2,4]TRIAZOLO[1,<br>5-A]PYRIMIDIN-7-<br>YL]AMINO}BENZENESULFONAMIDE                                                                        | -1.272 | -0.869 | 0.265  | -1.759 | -1.678 | 0.066 | 0.111 | 0.525 | 0.028 | 0.029 |



|         |                                                                                               |        |        |        |        |        |       |       |       |       |       |
|---------|-----------------------------------------------------------------------------------------------|--------|--------|--------|--------|--------|-------|-------|-------|-------|-------|
| DB07687 | 4-((5-[(4-AMINOCYCLOHEXYL)AMINO][1,2,4]TRIAZOLO[1,5-A]PYRIMIDIN-7-YL)AMINO)BENZENESULFONAMIDE | -1.272 | -0.869 | 0.265  | -1.759 | -1.678 | 0.066 | 0.111 | 0.525 | 0.028 | 0.029 |
| DB08814 | Triflusal                                                                                     | -1.272 | 0.105  | -0.422 | -2.993 | -1.717 | 0.088 | 0.461 | 0.251 | 0.004 | 0.037 |
| DB11611 | Lifitegrast                                                                                   | -1.263 | 0.437  | -0.267 | -3.013 | -3.21  | 0.019 | 0.695 | 0.106 | 0.003 | 0     |
| DB00811 | Ribavirin                                                                                     | -1.255 | -0.445 | -2.591 | -1.752 | 0.142  | 0.091 | 0.271 | 0.009 | 0.028 | 0.465 |
| DB00823 | Ethinodiol diacetate                                                                          | -1.25  | -0.32  | -0.962 | -3.76  | -1.648 | 0.054 | 0.274 | 0.125 | 0.005 | 0.026 |
| DB04552 | Niflumic acid                                                                                 | -1.25  | -2.073 | 1.824  | -0.304 | 0.411  | 0.085 | 0.01  | 0.932 | 0.28  | 0.565 |
| DB00727 | Nitroglycerin                                                                                 | -1.243 | -1.061 | -0.95  | -1.25  | -1.453 | 0.035 | 0.196 | 0.165 | 0.024 | 0.009 |
| DB00883 | Isosorbide dinitrate                                                                          | -1.243 | -1.061 | -0.95  | -1.25  | -1.453 | 0.035 | 0.196 | 0.165 | 0.024 | 0.009 |
| DB01612 | Amyl Nitrite                                                                                  | -1.243 | -1.061 | -0.95  | -1.25  | -1.453 | 0.035 | 0.196 | 0.165 | 0.024 | 0.009 |
| DB08047 | 4-[1-allyl-7-(trifluoromethyl)-1H-indazol-3-yl]benzene-1,3-diol                               | -1.243 | -0.414 | -0.734 | -2.543 | -1.491 | 0.054 | 0.257 | 0.178 | 0.008 | 0.037 |
| DB08773 | RALOXIFENE CORE                                                                               | -1.243 | -0.414 | -0.734 | -2.543 | -1.491 | 0.054 | 0.257 | 0.178 | 0.008 | 0.037 |
| DB00051 | Adalimumab                                                                                    | -1.242 | -1.692 | -1.262 | -0.515 | 0.73   | 0.078 | 0.039 | 0.073 | 0.236 | 0.694 |
| DB00603 | Medroxyprogesterone acetate                                                                   | -1.24  | -0.682 | -1.301 | -2.944 | -1.839 | 0.058 | 0.173 | 0.063 | 0.005 | 0.022 |
| DB09213 | Dexibuprofen                                                                                  | -1.237 | -0.601 | 1.408  | 0.242  | -1.462 | 0.089 | 0.223 | 0.885 | 0.521 | 0.041 |
| DB04491 | Diisopropylphosphono Group                                                                    | -1.233 | -1.211 | 0.199  | -1.211 | -0.778 | 0.014 | 0.045 | 0.469 | 0.053 | 0.122 |
| DB01219 | Dantrolene                                                                                    | -1.231 | -0.839 | 1.384  | -0.787 | -1.538 | 0.027 | 0.121 | 0.852 | 0.15  | 0.023 |
| DB06832 | 2-(3-FLUORO-4-HYDROXYPHENYL)-7-VINYL-1,3-BENZOXAZOL-5-OL                                      | -1.231 | -0.377 | -0.758 | -2.547 | -1.719 | 0.055 | 0.271 | 0.169 | 0.008 | 0.021 |
| DB06875 | 3-(3-FLUORO-4-HYDROXYPHENYL)-7-HYDROXY-1-NAPHTHONITRILE                                       | -1.231 | -0.377 | -0.758 | -2.547 | -1.719 | 0.055 | 0.271 | 0.169 | 0.008 | 0.021 |
| DB06927 | [5-HYDROXY-2-(4-HYDROXYPHENYL)-1-BENZOFURAN-7-YL]ACETONITRILE                                 | -1.231 | -0.377 | -0.758 | -2.547 | -1.719 | 0.055 | 0.271 | 0.169 | 0.008 | 0.021 |
| DB07009 | 2-(5-HYDROXY-NAPHTHALEN-1-YL)-1,3-BENZOOXAZOL-6-OL                                            | -1.231 | -0.377 | -0.758 | -2.547 | -1.719 | 0.055 | 0.271 | 0.169 | 0.008 | 0.021 |
| DB07119 | 1-CHLORO-6-(4-HYDROXYPHENYL)-2-NAPHTHOL                                                       | -1.231 | -0.377 | -0.758 | -2.547 | -1.719 | 0.055 | 0.271 | 0.169 | 0.008 | 0.021 |
| DB07150 | 4-(4-HYDROXYPHENYL)-1-NAPHTHALDEHYDE OXIME                                                    | -1.231 | -0.377 | -0.758 | -2.547 | -1.719 | 0.055 | 0.271 | 0.169 | 0.008 | 0.021 |
| DB07198 | 5-HYDROXY-2-(4-HYDROXYPHENYL)-1-BENZOFURAN-7-CARBONITRILE                                     | -1.231 | -0.377 | -0.758 | -2.547 | -1.719 | 0.055 | 0.271 | 0.169 | 0.008 | 0.021 |
| DB07230 | 3-BROMO-6-HYDROXY-2-(4-HYDROXYPHENYL)-1H-INDEN-1-ONE                                          | -1.231 | -0.377 | -0.758 | -2.547 | -1.719 | 0.055 | 0.271 | 0.169 | 0.008 | 0.021 |
| DB07236 | 3-(6-HYDROXY-NAPHTHALEN-2-YL)-BENZO[D]ISOOXAZOL-6-OL                                          | -1.231 | -0.377 | -0.758 | -2.547 | -1.719 | 0.055 | 0.271 | 0.169 | 0.008 | 0.021 |
| DB07268 | 2-((2-[(3-HYDROXYPHENYL)AMINO]PYRIMIDIN-4-YL)AMINO)BENZAMIDE                                  | -1.224 | -1.134 | 0.186  | -1.731 | -0.145 | 0.064 | 0.053 | 0.407 | 0.022 | 0.34  |
| DB09462 | Glycerin                                                                                      | -1.215 | -1.947 | 0.505  | 1.01   | -0.242 | 0.092 | 0.019 | 0.558 | 0.801 | 0.338 |
| DB04815 | Clioquinol                                                                                    | -1.212 | -0.87  | -0.546 | -0.975 | 0.071  | 0.06  | 0.11  | 0.232 | 0.129 | 0.429 |
| DB06713 | Norelgestromin                                                                                | -1.206 | -0.212 | -0.663 | -3.215 | -1.414 | 0.057 | 0.303 | 0.191 | 0.005 | 0.043 |
| DB02216 | S-Methylcysteine                                                                              | -1.205 | -0.628 | -0.335 | -2.971 | -2.169 | 0.02  | 0.183 | 0.077 | 0.002 | 0.001 |
| DB00588 | Fluticasone propionate                                                                        | -1.204 | -0.494 | 0.291  | -1.953 | -1.276 | 0.091 | 0.251 | 0.229 | 0.021 | 0.068 |
| DB04817 | Metamizole                                                                                    | -1.199 | -1.184 | -0.279 | -1.563 | -1.26  | 0.006 | 0.034 | 0.437 | 0.002 | 0.007 |
| DB01051 | Novobiocin                                                                                    | -1.194 | -1.132 | -0.592 | -1.273 | -1.427 | 0.061 | 0.174 | 0.321 | 0.021 | 0.009 |
| DB01241 | Gemfibrozil                                                                                   | -1.192 | -1.005 | 1.304  | 0.987  | -0.948 | 0.091 | 0.124 | 0.834 | 0.659 | 0.133 |
| DB01196 | Estramustine                                                                                  | -1.191 | -0.223 | -1.459 | -2.36  | -1.669 | 0.056 | 0.31  | 0.046 | 0.011 | 0.033 |
| DB00584 | Enalapril                                                                                     | -1.185 | -0.743 | 0.414  | -1.197 | -1.289 | 0.015 | 0.141 | 0.546 | 0.058 | 0.021 |
| DB08951 | Indoprofen                                                                                    | -1.184 | -0.328 | -0.76  | -1.656 | -0.738 | 0.066 | 0.258 | 0.157 | 0.032 | 0.149 |
| DB01178 | Chlormezanone                                                                                 | -1.182 | -1.159 | -0.371 | -1.119 | -1.272 | 0.007 | 0.033 | 0.395 | 0.023 | 0.017 |
| DB01185 | Fluoxymesterone                                                                               | -1.182 | -0.283 | -1.433 | -3.22  | -1.653 | 0.052 | 0.271 | 0.048 | 0.004 | 0.031 |
| DB06905 | (2S,3S,4E,6E,8S,9S)-3-amino-9-methoxy-2,6,8-trimethyl-10-phenyldeca-4,6-dienoic acid          | -1.182 | -0.244 | 0.641  | -0.965 | -1.895 | 0.091 | 0.352 | 0.389 | 0.109 | 0.016 |
| DB01269 | Panitumumab                                                                                   | -1.173 | -0.884 | 0.411  | -0.176 | -1.872 | 0.071 | 0.121 | 0.328 | 0.292 | 0.02  |
| DB09559 | Necitumumab                                                                                   | -1.173 | -0.884 | 0.411  | -0.176 | -1.872 | 0.071 | 0.121 | 0.328 | 0.292 | 0.02  |

|         |                                                                                                                   |        |        |        |        |        |       |       |       |       |       |
|---------|-------------------------------------------------------------------------------------------------------------------|--------|--------|--------|--------|--------|-------|-------|-------|-------|-------|
| DB00784 | Mefenamic acid                                                                                                    | -1.17  | -0.967 | 1.886  | -1.088 | -1.851 | 0.1   | 0.137 | 0.948 | 0.098 | 0.033 |
| DB01133 | Tiludronic acid                                                                                                   | -1.163 | -0.436 | -1.671 | 0.571  | -1.213 | 0.104 | 0.282 | 0.018 | 0.572 | 0.073 |
| DB01041 | Thalidomide                                                                                                       | -1.159 | -0.642 | -1.498 | -1.801 | -1.414 | 0.068 | 0.19  | 0.048 | 0.027 | 0.057 |
| DB03721 | N-acetyl-alpha-neuraminic acid                                                                                    | -1.156 | -0.882 | 1.963  | -1.61  | 0.174  | 0.101 | 0.142 | 0.952 | 0.039 | 0.471 |
| DB07533 | 4-{5-[(Z)-(2-IMINO-4-OXO-1,3-THIAZOLIDIN-5-YLIDENE)METHYL]-2-FURYL}-N-METHYLBENZENESULFONAMIDE                    | -1.145 | -0.956 | -0.758 | -1.396 | -1.012 | 0.063 | 0.123 | 0.169 | 0.055 | 0.08  |
| DB07534 | 4-{5-[(Z)-(2-IMINO-4-OXO-1,3-THIAZOLIDIN-5-YLIDENE)METHYL]FURAN-2-YL}BENZENESULFONAMIDE                           | -1.145 | -0.956 | -0.758 | -1.396 | -1.012 | 0.063 | 0.123 | 0.169 | 0.055 | 0.08  |
| DB07538 | 4-{5-[(Z)-(2-IMINO-4-OXO-1,3-THIAZOLIDIN-5-YLIDENE)METHYL]FURAN-2-YL}-2-(TRIFLUOROMETHYL)BENZENESULFONAMIDE       | -1.145 | -0.956 | -0.758 | -1.396 | -1.012 | 0.063 | 0.123 | 0.169 | 0.055 | 0.08  |
| DB01296 | Glucosamine                                                                                                       | -1.142 | -0.36  | -1.711 | -1.56  | -0.177 | 0.109 | 0.307 | 0.022 | 0.029 | 0.346 |
| DB03467 | Naringenin                                                                                                        | -1.127 | -1.096 | -0.171 | -0.375 | -1.174 | 0.093 | 0.105 | 0.246 | 0.206 | 0.083 |
| DB00492 | Fosinopril                                                                                                        | -1.126 | -1.054 | -0.371 | -1.119 | -1.272 | 0.031 | 0.099 | 0.395 | 0.023 | 0.017 |
| DB00519 | Trandolapril                                                                                                      | -1.126 | -1.054 | -0.371 | -1.119 | -1.272 | 0.031 | 0.099 | 0.395 | 0.023 | 0.017 |
| DB00542 | Benazepril                                                                                                        | -1.126 | -1.054 | -0.371 | -1.119 | -1.272 | 0.031 | 0.099 | 0.395 | 0.023 | 0.017 |
| DB01340 | Cilazapril                                                                                                        | -1.126 | -1.054 | -0.371 | -1.119 | -1.272 | 0.031 | 0.099 | 0.395 | 0.023 | 0.017 |
| DB01348 | Spirapril                                                                                                         | -1.126 | -1.054 | -0.371 | -1.119 | -1.272 | 0.031 | 0.099 | 0.395 | 0.023 | 0.017 |
| DB08836 | Temocapril                                                                                                        | -1.126 | -1.054 | -0.371 | -1.119 | -1.272 | 0.031 | 0.099 | 0.395 | 0.023 | 0.017 |
| DB13166 | Zofenopril                                                                                                        | -1.126 | -1.054 | -0.371 | -1.119 | -1.272 | 0.031 | 0.099 | 0.395 | 0.023 | 0.017 |
| DB08217 | S-[(1-Hydroxy-2,2,5,5-tetramethyl-2,5-dihydro-1H-pyrrol-3-yl)methyl]methanesulfonothioate                         | -1.117 | -1.125 | 1.416  | -1.392 | -2.069 | 0.001 | 0.009 | 0.886 | 0.024 | 0     |
| DB03297 | Benzylsulfonic Acid                                                                                               | -1.097 | -0.988 | 0.286  | -1.357 | -0.961 | 0.006 | 0.034 | 0.591 | 0.019 | 0.032 |
| DB04186 | N'-(Pyrrolidino[2,1-B]Isoindolin-4-On-8-Yl)-N-(Pyridin-2-Yl)Urea                                                  | -1.097 | -0.588 | -0.299 | -1.371 | -1.122 | 0.091 | 0.203 | 0.294 | 0.05  | 0.076 |
| DB00221 | Isoetarine                                                                                                        | -1.094 | -0.4   | -1.145 | 0.357  | -1.436 | 0.114 | 0.288 | 0.054 | 0.565 | 0.049 |
| DB07347 | 4-(2-Aminoethyl)Benzenesulfonyl Fluoride                                                                          | -1.091 | -0.161 | 0.249  | -1.628 | -1.899 | 0.091 | 0.395 | 0.219 | 0.031 | 0.017 |
| DB01257 | Eculizumab                                                                                                        | -1.085 | -0.942 | -0.34  | -1.057 | -1.212 | 0.072 | 0.186 | 0.414 | 0.037 | 0.019 |
| DB01649 | 7-methyl-GpppA                                                                                                    | -1.085 | -0.793 | 1.554  | -1.209 | -2.281 | 0.021 | 0.135 | 0.891 | 0.078 | 0     |
| DB01960 | 7n-Methyl-8-Hydroguanosine-5'-Diphosphate                                                                         | -1.085 | -0.793 | 1.554  | -1.209 | -2.281 | 0.021 | 0.135 | 0.891 | 0.078 | 0     |
| DB04573 | Estriol                                                                                                           | -1.084 | -0.123 | -1.837 | -2.194 | -1.39  | 0.069 | 0.353 | 0.028 | 0.014 | 0.048 |
| DB00052 | Somatotropin                                                                                                      | -1.083 | -0.823 | -0.604 | 0.077  | -1.481 | 0.009 | 0.089 | 0.052 | 0.314 | 0.005 |
| DB00169 | Cholecalciferol                                                                                                   | -1.083 | -0.535 | 1.234  | 0.229  | -1.371 | 0.098 | 0.249 | 0.817 | 0.509 | 0.045 |
| DB00839 | Tolazamide                                                                                                        | -1.08  | -0.894 | -0.258 | -0.968 | -1.313 | 0.049 | 0.225 | 0.437 | 0.036 | 0.001 |
| DB04845 | Ixabepilone                                                                                                       | -1.079 | -0.707 | -0.875 | -0.998 | -2.288 | 0.042 | 0.174 | 0.157 | 0.085 | 0.001 |
| DB00236 | Pipobroman                                                                                                        | -1.078 | -1.038 | -0.377 | -1.137 | -1.372 | 0.033 | 0.159 | 0.412 | 0.026 | 0.002 |
| DB00414 | Acetohexamide                                                                                                     | -1.078 | -1.038 | -0.377 | -1.137 | -1.372 | 0.033 | 0.159 | 0.412 | 0.026 | 0.002 |
| DB00916 | Metronidazole                                                                                                     | -1.078 | -1.038 | -0.377 | -1.137 | -1.372 | 0.033 | 0.159 | 0.412 | 0.026 | 0.002 |
| DB09330 | Osimertinib                                                                                                       | -1.074 | -0.653 | 0.652  | 0.424  | -2.129 | 0.093 | 0.177 | 0.432 | 0.579 | 0.015 |
| DB08441 | 6-BROMO-13-THIA-2,4,8,12,19-PENTAAZATRICYCLO[12.3.1.1~3,7~]NONADECANE-1(18),3(19),4,6,14,16-HEXAENE 13,13-DIOXIDE | -1.072 | -0.729 | -0.786 | -1.894 | -1.094 | 0.068 | 0.187 | 0.159 | 0.019 | 0.069 |
| DB01306 | Insulin Aspart                                                                                                    | -1.065 | -1.195 | 0.296  | 0.283  | -1.315 | 0.004 | 0.009 | 0.542 | 0.514 | 0     |
| DB01307 | Insulin Detemir                                                                                                   | -1.065 | -1.195 | 0.296  | 0.283  | -1.315 | 0.004 | 0.009 | 0.542 | 0.514 | 0     |
| DB01309 | Insulin Glulisine                                                                                                 | -1.065 | -1.195 | 0.296  | 0.283  | -1.315 | 0.004 | 0.009 | 0.542 | 0.514 | 0     |
| DB09564 | Insulin Degludec                                                                                                  | -1.065 | -1.195 | 0.296  | 0.283  | -1.315 | 0.004 | 0.009 | 0.542 | 0.514 | 0     |
| DB03271 |                                                                                                                   | -1.063 | -0.042 | 0.971  | -0.921 | -2.84  | 0.087 | 0.476 | 0.745 | 0.114 | 0     |
| DB00655 | Estrone                                                                                                           | -1.059 | -0.108 | -1.217 | -1.916 | -1.896 | 0.068 | 0.368 | 0.086 | 0.017 | 0.018 |
| DB04652 | Corticosterone                                                                                                    | -1.058 | -0.93  | 0.757  | 1.573  | -2.521 | 0.12  | 0.145 | 0.656 | 0.916 | 0.003 |

|         |                                                                                                                                          |        |        |        |        |        |       |       |       |       |       |
|---------|------------------------------------------------------------------------------------------------------------------------------------------|--------|--------|--------|--------|--------|-------|-------|-------|-------|-------|
| DB06698 | Betahistine                                                                                                                              | -1.058 | -0.97  | -0.645 | -1.176 | -1.26  | 0.077 | 0.193 | 0.263 | 0.021 | 0.007 |
| DB04751 | Purvalanol A                                                                                                                             | -1.057 | -0.376 | 0.089  | -0.789 | -1.343 | 0.074 | 0.244 | 0.453 | 0.154 | 0.058 |
| DB00240 | Alclometasone                                                                                                                            | -1.056 | -0.844 | -0.111 | -1.159 | -1.169 | 0.049 | 0.099 | 0.142 | 0.066 | 0.035 |
| DB00592 | Piperazine                                                                                                                               | -1.056 | -0.887 | -0.34  | -1.057 | -1.212 | 0.097 | 0.256 | 0.414 | 0.037 | 0.019 |
| DB00596 | Ulobetasol                                                                                                                               | -1.056 | -0.844 | -0.111 | -1.159 | -1.169 | 0.049 | 0.099 | 0.142 | 0.066 | 0.035 |
| DB00663 | Flumetasone                                                                                                                              | -1.056 | -0.844 | -0.111 | -1.159 | -1.169 | 0.049 | 0.099 | 0.142 | 0.066 | 0.035 |
| DB00769 | Hydrocortamate                                                                                                                           | -1.056 | -0.844 | -0.111 | -1.159 | -1.169 | 0.049 | 0.099 | 0.142 | 0.066 | 0.035 |
| DB00838 | Clocortolone                                                                                                                             | -1.056 | -0.844 | -0.111 | -1.159 | -1.169 | 0.049 | 0.099 | 0.142 | 0.066 | 0.035 |
| DB00873 | Loteprednol                                                                                                                              | -1.056 | -0.844 | -0.111 | -1.159 | -1.169 | 0.049 | 0.099 | 0.142 | 0.066 | 0.035 |
| DB01263 | Posaconazole                                                                                                                             | -1.056 | -0.887 | -0.34  | -1.057 | -1.212 | 0.097 | 0.256 | 0.414 | 0.037 | 0.019 |
| DB01384 | Paramethasone                                                                                                                            | -1.056 | -0.844 | -0.111 | -1.159 | -1.169 | 0.049 | 0.099 | 0.142 | 0.066 | 0.035 |
| DB06781 | Difluprednate                                                                                                                            | -1.056 | -0.844 | -0.111 | -1.159 | -1.169 | 0.049 | 0.099 | 0.142 | 0.066 | 0.035 |
| DB08906 | Fluticasone furoate                                                                                                                      | -1.056 | -0.844 | -0.111 | -1.159 | -1.169 | 0.049 | 0.099 | 0.142 | 0.066 | 0.035 |
| DB13158 | Clobetasone                                                                                                                              | -1.056 | -0.844 | -0.111 | -1.159 | -1.169 | 0.049 | 0.099 | 0.142 | 0.066 | 0.035 |
| DB01593 | Zinc                                                                                                                                     | -1.055 | -1.733 | -0.009 | -0.036 | -0.107 | 0.126 | 0.057 | 0.45  | 0.384 | 0.38  |
| DB01277 | Mecasermin                                                                                                                               | -1.054 | -0.366 | 0.246  | 1.488  | -1.955 | 0.115 | 0.303 | 0.206 | 0.838 | 0.009 |
| DB07336 | 4-[3-(1H-BENZIMIDAZOL-2-YL)-1H-INDAZOL-6-YL]-2-METHOXYPHENOL                                                                             | -1.044 | -0.266 | -0.052 | -2.309 | -1.074 | 0.094 | 0.29  | 0.287 | 0.01  | 0.086 |
| DB03365 | 4-[3-Hydroxyanilino]-6,7-Dimethoxyquinazoline                                                                                            | -1.038 | -0.293 | -0.282 | -2.025 | -0.605 | 0.096 | 0.274 | 0.221 | 0.018 | 0.16  |
| DB00552 | Pentostatin                                                                                                                              | -1.035 | -0.896 | -1.547 | -1.422 | -1.324 | 0.019 | 0.118 | 0.002 | 0.001 | 0.005 |
| DB01805 | Monoisopropylphosphorylserine                                                                                                            | -1.03  | -1.258 | 0.761  | -1.233 | -0.636 | 0.015 | 0.018 | 0.735 | 0.044 | 0.151 |
| DB06237 | Avanafil                                                                                                                                 | -1.03  | -0.916 | -0.279 | -0.983 | -1.174 | 0.102 | 0.256 | 0.437 | 0.112 | 0.029 |
| DB00571 | Propranolol                                                                                                                              | -1.02  | -1.415 | -1.095 | 1.158  | -0.063 | 0.137 | 0.07  | 0.087 | 0.846 | 0.395 |
| DB06317 | Elotuzumab                                                                                                                               | -1.018 | -0.833 | -0.258 | -0.968 | -1.219 | 0.093 | 0.277 | 0.437 | 0.036 | 0.003 |
| DB00648 | Mitotane                                                                                                                                 | -1.014 | 0.399  | 0.222  | -2.313 | -1.219 | 0.099 | 0.6   | 0.476 | 0.016 | 0.077 |
| DB07664 | 5-AMINO-3-[[4-(AMINOSULFONYL)PHENYL]AMINO]-N-(2,6-DIFLUOROPHENYL)-1H-1,2,4-TRIAZOLE-1-CARBOTHIOAMIDE                                     | -1.012 | -0.556 | -1.04  | -1.67  | -0.8   | 0.076 | 0.2   | 0.113 | 0.038 | 0.149 |
| DB09031 | Miltefosine                                                                                                                              | -1.003 | -1.836 | -1.025 | -1.235 | -0.354 | 0.077 | 0.023 | 0.075 | 0.079 | 0.247 |
| DB07431 | (3R)-3-(aminomethyl)-9-methoxy-1,2,3,4-tetrahydro-5H-[1]benzothieno[3,2-e][1,4]diazepin-5-one                                            | -1     | -0.538 | -0.819 | -1.982 | -1.145 | 0.079 | 0.232 | 0.153 | 0.017 | 0.063 |
| DB06689 | Ethanolamine oleate                                                                                                                      | -0.998 | -0.634 | 2.244  | 0.359  | -0.724 | 0.135 | 0.223 | 0.985 | 0.554 | 0.195 |
| DB08348 | N-2~,N-2~-DIMETHYL-N~1~-(6-OXO-5,6-DIHYDROPHENANTHRIDIN-2-YL)GLYCINAMIDE                                                                 | -0.995 | -0.043 | -1.727 | -2.458 | 0.028  | 0.137 | 0.431 | 0.032 | 0.006 | 0.444 |
| DB03490 | 3-Pyridin-4-Yl-2,4-Dihydro-Indeno[1,2-C.]Pyrazole                                                                                        | -0.991 | -0.196 | -0.983 | -1.759 | -1.678 | 0.098 | 0.315 | 0.117 | 0.028 | 0.029 |
| DB04288 | 2-[Trans-(4-Aminocyclohexyl)Amino]-6-(Benzyl-Amino)-9-Cyclopentylpurine                                                                  | -0.991 | -0.196 | -0.983 | -1.759 | -1.678 | 0.098 | 0.315 | 0.117 | 0.028 | 0.029 |
| DB07024 | 2-(3,4-DIHYDROXYPHENYL)-8-(1,1-DIOXIDOISOTHIAZOLIDIN-2-YL)-3-HYDROXY-6-METHYL-4H-CHROMEN-4-ONE                                           | -0.991 | -0.196 | -0.983 | -1.759 | -1.678 | 0.098 | 0.315 | 0.117 | 0.028 | 0.029 |
| DB07936 | N-(4-[[[(3S)-3-(dimethylamino)pyrrolidin-1-yl]carbonyl]phenyl]-5-fluoro-4-[2-methyl-1-(1-methylethyl)-1H-imidazol-5-yl]pyrimidin-2-amine | -0.991 | -0.196 | -0.983 | -1.759 | -1.678 | 0.098 | 0.315 | 0.117 | 0.028 | 0.029 |
| DB08122 | N-METHYL-4-[[[(2-OXO-1,2-DIHYDRO-3H-INDOL-3-YLIDENE)METHYL]AMINO]BENZENESULFONAMIDE                                                      | -0.991 | -0.196 | -0.983 | -1.759 | -1.678 | 0.098 | 0.315 | 0.117 | 0.028 | 0.029 |

|         |                                                                                                               |        |        |        |        |        |       |       |       |       |       |
|---------|---------------------------------------------------------------------------------------------------------------|--------|--------|--------|--------|--------|-------|-------|-------|-------|-------|
| DB08123 | N-METHYL-{4-[2-(7-OXO-6,7-DIHYDRO-8H-[1,3]THIAZOLO[5,4-E]INDOL-8-YLIDENE)HYDRAZINO]PHENYL}METHANE SULFONAMIDE | -0.991 | -0.196 | -0.983 | -1.759 | -1.678 | 0.098 | 0.315 | 0.117 | 0.028 | 0.029 |
| DB08124 | 3-[[2,2-DIOXIDO-1,3-DIHYDRO-2-BENZOTHIEN-5-YL)AMINO]METHYLENE]-5-(1,3-OXAZOL-5-YL)-1,3-DIHYDRO-2H-INDOL-2-ONE | -0.991 | -0.196 | -0.983 | -1.759 | -1.678 | 0.098 | 0.315 | 0.117 | 0.028 | 0.029 |
| DB08125 | 4-[[2-OXO-1,2-DIHYDRO-3H-INDOL-3-YLIDENE)METHYL]AMINO]-N-(1,3-THIAZOL-2-YL)BENZENESULFONAMIDE                 | -0.991 | -0.196 | -0.983 | -1.759 | -1.678 | 0.098 | 0.315 | 0.117 | 0.028 | 0.029 |
| DB08126 | 3-[[4-([AMINO(IMINO)METHYL]AMINOSULFONYL)ANILINO]METHYLENE]-2-OXO-2,3-DIHYDRO-1H-INDOLE                       | -0.991 | -0.196 | -0.983 | -1.759 | -1.678 | 0.098 | 0.315 | 0.117 | 0.028 | 0.029 |
| DB08138 | {[(2,6-difluorophenyl)carbonyl]amino}-N-(4-fluorophenyl)-1H-pyrazole-3-carboxamide                            | -0.991 | -0.196 | -0.983 | -1.759 | -1.678 | 0.098 | 0.315 | 0.117 | 0.028 | 0.029 |
| DB08141 | 4-[[2,6-difluorophenyl)carbonyl]amino}-N-[(3S)-piperidin-3-yl]-1H-pyrazole-3-carboxamide                      | -0.991 | -0.196 | -0.983 | -1.759 | -1.678 | 0.098 | 0.315 | 0.117 | 0.028 | 0.029 |
| DB00974 | Edetic Acid                                                                                                   | -0.988 | -0.852 | -0.238 | -0.955 | -1.287 | 0.041 | 0.206 | 0.461 | 0.043 | 0.002 |
| DB01411 | Pranlukast                                                                                                    | -0.988 | 0.122  | -1.488 | -0.76  | -1.098 | 0.106 | 0.456 | 0.057 | 0.174 | 0.065 |
| DB09039 | Eliglustat                                                                                                    | -0.988 | -0.852 | -0.238 | -0.955 | -1.287 | 0.041 | 0.206 | 0.461 | 0.043 | 0.002 |
| DB00634 | Sulfacetamide                                                                                                 | -0.984 | -0.875 | -0.029 | -0.841 | -1.253 | 0.009 | 0.08  | 0.527 | 0.05  | 0     |
| DB01131 | Proguanil                                                                                                     | -0.984 | -0.875 | -0.029 | -0.841 | -1.253 | 0.009 | 0.08  | 0.527 | 0.05  | 0     |
| DB02015 | Dihydrofolic Acid                                                                                             | -0.984 | -0.875 | -0.029 | -0.841 | -1.253 | 0.009 | 0.08  | 0.527 | 0.05  | 0     |
| DB08741 | 5-[[2,2-cyclopropyl-7,8-dimethoxy-2H-chromen-5-yl]methyl]pyrimidine-2,4-diamine                               | -0.984 | -0.875 | -0.029 | -0.841 | -1.253 | 0.009 | 0.08  | 0.527 | 0.05  | 0     |
| DB08878 | Aminopterin                                                                                                   | -0.984 | -0.875 | -0.029 | -0.841 | -1.253 | 0.009 | 0.08  | 0.527 | 0.05  | 0     |
| DB09086 | Eugenol                                                                                                       | -0.978 | 0.143  | -1.436 | -3.016 | -1.174 | 0.107 | 0.479 | 0.051 | 0.009 | 0.077 |
| DB01686 | N,N-dimethylarginine                                                                                          | -0.977 | 0.324  | 1.041  | -0.519 | -3.333 | 0.119 | 0.559 | 0.74  | 0.219 | 0     |
| DB02207 | 7-Nitroindazole                                                                                               | -0.977 | 0.324  | 1.041  | -0.519 | -3.333 | 0.119 | 0.559 | 0.74  | 0.219 | 0     |
| DB02234 | S-Ethylisothiouraea                                                                                           | -0.977 | 0.324  | 1.041  | -0.519 | -3.333 | 0.119 | 0.559 | 0.74  | 0.219 | 0     |
| DB03100 | 6-Nitroindazole                                                                                               | -0.977 | 0.324  | 1.041  | -0.519 | -3.333 | 0.119 | 0.559 | 0.74  | 0.219 | 0     |
| DB04534 | 5-Nitroindazole                                                                                               | -0.977 | 0.324  | 1.041  | -0.519 | -3.333 | 0.119 | 0.559 | 0.74  | 0.219 | 0     |
| DB07001 | (3S,5E)-3-propyl-3,4-dihydrothieno[2,3-f][1,4]oxazepin-5(2H)-imine                                            | -0.977 | 0.324  | 1.041  | -0.519 | -3.333 | 0.119 | 0.559 | 0.74  | 0.219 | 0     |
| DB07388 | ETHYL 4-[(4-METHYLPYRIDIN-2-YL)AMINO]PIPERIDINE-1-CARBOXYLATE                                                 | -0.977 | 0.324  | 1.041  | -0.519 | -3.333 | 0.119 | 0.559 | 0.74  | 0.219 | 0     |
| DB00764 | Mometasone                                                                                                    | -0.972 | -0.568 | 0.198  | -1.743 | -1.117 | 0.111 | 0.243 | 0.198 | 0.028 | 0.083 |
| DB02930 | Adenosine 5'-[??-thio]triphosphate                                                                            | -0.968 | -0.863 | 0.157  | 0.074  | -1.384 | 0.01  | 0.074 | 0.478 | 0.333 | 0.006 |
| DB00046 | Insulin Lispro                                                                                                | -0.966 | -0.97  | 1.04   | 1.231  | -1.049 | 0.099 | 0.124 | 0.774 | 0.753 | 0.093 |
| DB00047 | Insulin glargine                                                                                              | -0.966 | -0.97  | 1.04   | 1.231  | -1.049 | 0.099 | 0.124 | 0.774 | 0.753 | 0.093 |
| DB00867 | Ritodrine                                                                                                     | -0.966 | -0.355 | -2.146 | 0.061  | -1.657 | 0.137 | 0.311 | 0.009 | 0.421 | 0.02  |
| DB03382 | S-oxy-L-cysteine                                                                                              | -0.959 | -1.07  | -0.477 | 1.496  | -0.002 | 0.141 | 0.107 | 0.108 | 0.93  | 0.41  |
| DB01125 | Anisindione                                                                                                   | -0.958 | -0.852 | -0.238 | -0.955 | -1.198 | 0.058 | 0.206 | 0.461 | 0.043 | 0.013 |
| DB02366 | CRA_10762                                                                                                     | -0.958 | -0.607 | 0.429  | -0.9   | -1.271 | 0.036 | 0.201 | 0.554 | 0.093 | 0.025 |
| DB09269 | Phenylacetic acid                                                                                             | -0.95  | -0.823 | -0.084 | -0.818 | -1.18  | 0.031 | 0.148 | 0.509 | 0.069 | 0.002 |
| DB05482 | 7-ethyl-10-hydroxycamptothecin                                                                                | -0.947 | -0.094 | 0.321  | -3.462 | -1.539 | 0.046 | 0.478 | 0.521 | 0     | 0.007 |

|         |                                                                                            |        |        |        |        |        |       |       |       |       |       |
|---------|--------------------------------------------------------------------------------------------|--------|--------|--------|--------|--------|-------|-------|-------|-------|-------|
| DB06884 | 4-HYDROXY-N'-(4-ISOPROPYLBENZYL)BENZOHYDRAZIDE                                             | -0.947 | -0.686 | 0.756  | 0.697  | -1.69  | 0.073 | 0.168 | 0.635 | 0.548 | 0.011 |
| DB01331 | Cefoxitin                                                                                  | -0.946 | -0.912 | -0.735 | -1     | -1.139 | 0.064 | 0.215 | 0.202 | 0.041 | 0.028 |
| DB00827 | Cinoxacin                                                                                  | -0.943 | -0.791 | -0.071 | -1.329 | -1.193 | 0.037 | 0.209 | 0.494 | 0.002 | 0.005 |
| DB07177 | (5E,13E)-11-HYDROXY-9,15-DIOXOPROSTA-5,13-DIEN-1-OIC ACID                                  | -0.943 | -0.779 | -0.313 | -0.918 | -1.198 | 0.048 | 0.235 | 0.404 | 0.042 | 0.005 |
| DB09343 | Tipiracil                                                                                  | -0.943 | -0.791 | -0.071 | -0.865 | -1.193 | 0.037 | 0.209 | 0.494 | 0.045 | 0.005 |
| DB05804 | Prasterone sulfate                                                                         | -0.941 | -0.78  | -0.645 | -0.968 | -1.14  | 0.072 | 0.254 | 0.224 | 0.036 | 0.036 |
| DB04185 | Norvaline                                                                                  | -0.939 | -0.795 | -0.321 | -0.9   | -1.123 | 0.061 | 0.207 | 0.378 | 0.055 | 0.014 |
| DB05676 | Apremilast                                                                                 | -0.937 | -0.959 | -2.067 | -0.395 | -0.269 | 0.142 | 0.13  | 0.013 | 0.245 | 0.31  |
| DB01428 | Oxybenzone                                                                                 | -0.935 | 0.18   | -1.425 | -2.7   | -1.152 | 0.093 | 0.499 | 0.063 | 0.009 | 0.066 |
| DB01524 | Androstenediol                                                                             | -0.935 | -0.084 | -1.541 | -2.265 | -1.602 | 0.077 | 0.333 | 0.045 | 0.018 | 0.033 |
| DB07402 | Azapropazone                                                                               | -0.935 | -0.856 | 0.198  | -1.383 | -1.087 | 0.031 | 0.125 | 0.62  | 0.001 | 0.012 |
| DB01058 | Praziquantel                                                                               | -0.934 | -0.858 | -0.169 | -0.928 | -1.168 | 0.036 | 0.15  | 0.487 | 0.034 | 0.009 |
| DB02703 | Fusidic acid                                                                               | -0.934 | -0.858 | -0.169 | -0.928 | -1.168 | 0.036 | 0.15  | 0.487 | 0.034 | 0.009 |
| DB02950 | Hymenialdisine                                                                             | -0.934 | -0.492 | -0.62  | -1.841 | -1.015 | 0.087 | 0.243 | 0.212 | 0.019 | 0.08  |
| DB07220 | N-[5-(1,1-DIOXIDOISOTHIAZOLIDIN-2-YL)-1H-INDAZOL-3-YL]-2-(4-PIPERIDIN-1-YLPHENYL)ACETAMIDE | -0.934 | -0.492 | -0.62  | -1.452 | -1.256 | 0.087 | 0.243 | 0.212 | 0.046 | 0.051 |
| DB08880 | Teriflunomide                                                                              | -0.934 | -0.858 | -0.611 | -0.928 | -1.075 | 0.036 | 0.15  | 0.241 | 0.034 | 0.022 |
| DB08299 | 4-[8-(3-nitrophenyl)-1,7-naphthyridin-6-yl]benzoic acid                                    | -0.926 | -0.54  | 1.064  | -1.096 | -0.758 | 0.076 | 0.218 | 0.784 | 0.07  | 0.124 |
| DB00923 | Ceforanide                                                                                 | -0.925 | -0.737 | -0.778 | -0.943 | -1.07  | 0.113 | 0.317 | 0.321 | 0.044 | 0.05  |
| DB00291 | Chlorambucil                                                                               | -0.922 | 0.091  | -1.057 | -2.067 | -1.657 | 0.099 | 0.444 | 0.083 | 0.015 | 0.038 |
| DB00351 | Megestrol acetate                                                                          | -0.919 | -0.33  | 1.022  | -1.357 | -1.217 | 0.151 | 0.316 | 0.76  | 0.056 | 0.08  |
| DB00216 | Eletriptan                                                                                 | -0.917 | -1.136 | 1.017  | 1.165  | -0.123 | 0.123 | 0.088 | 0.767 | 0.832 | 0.366 |
| DB01759 | Kojic acid                                                                                 | -0.917 | -0.824 | -0.469 | -1.03  | -1.149 | 0.11  | 0.266 | 0.323 | 0.028 | 0.015 |
| DB00601 | Linezolid                                                                                  | -0.916 | -0.738 | -0.309 | -0.894 | -1.217 | 0.043 | 0.264 | 0.396 | 0.038 | 0.003 |
| DB01247 | Isocarboxazid                                                                              | -0.916 | -0.738 | -0.309 | -0.894 | -1.217 | 0.043 | 0.264 | 0.396 | 0.038 | 0.003 |
| DB01626 | Pargyline                                                                                  | -0.916 | -0.738 | -0.309 | -0.894 | -1.217 | 0.043 | 0.264 | 0.396 | 0.038 | 0.003 |
| DB02095 | Isatin                                                                                     | -0.916 | -0.738 | -0.309 | -0.894 | -1.217 | 0.043 | 0.264 | 0.396 | 0.038 | 0.003 |
| DB02211 | N-Methyl-N-Propargyl-1(R)-Aminoindan                                                       | -0.916 | -0.738 | -0.309 | -0.894 | -1.217 | 0.043 | 0.264 | 0.396 | 0.038 | 0.003 |
| DB04307 | 5-Hydroxy-N-Propargyl-1(R)-Aminoindan                                                      | -0.916 | -0.738 | -0.309 | -0.894 | -1.217 | 0.043 | 0.264 | 0.396 | 0.038 | 0.003 |
| DB04818 | Iproniazid                                                                                 | -0.916 | -0.738 | -0.309 | -0.894 | -1.217 | 0.043 | 0.264 | 0.396 | 0.038 | 0.003 |
| DB09245 | Toloxatone                                                                                 | -0.916 | -0.738 | -0.309 | -0.894 | -1.217 | 0.043 | 0.264 | 0.396 | 0.038 | 0.003 |
| DB09248 | Mebanazine                                                                                 | -0.916 | -0.738 | -0.309 | -0.894 | -1.217 | 0.043 | 0.264 | 0.396 | 0.038 | 0.003 |
| DB09250 | Pheniprazine                                                                               | -0.916 | -0.738 | -0.309 | -0.894 | -1.217 | 0.043 | 0.264 | 0.396 | 0.038 | 0.003 |
| DB08819 | Tafluprost                                                                                 | -0.915 | -0.856 | -0.307 | -1     | -1.227 | 0.096 | 0.278 | 0.427 | 0.041 | 0.013 |
| DB00428 | Streptozocin                                                                               | -0.914 | -0.795 | 0.583  | -1.198 | -0.879 | 0.011 | 0.068 | 0.688 | 0.023 | 0.044 |
| DB01407 | Clenbuterol                                                                                | -0.914 | -0.567 | -3.435 | -0.126 | -1.497 | 0.154 | 0.239 | 0     | 0.37  | 0.046 |
| DB06243 | Eflornithine                                                                               | -0.911 | -0.728 | -0.071 | -0.865 | -1.193 | 0.064 | 0.286 | 0.494 | 0.045 | 0.005 |
| DB00444 | Teniposide                                                                                 | -0.909 | -0.337 | -0.771 | -1.197 | -0.267 | 0.151 | 0.311 | 0.101 | 0.081 | 0.328 |
| DB01012 | Cinacalcet                                                                                 | -0.906 | -0.767 | -0.022 | -0.778 | -1.176 | 0.088 | 0.271 | 0.549 | 0.164 | 0.008 |
| DB09074 | Olaparib                                                                                   | -0.906 | -0.379 | -1.351 | -2.414 | 1.703  | 0.151 | 0.298 | 0.037 | 0.003 | 0.934 |
| DB04474 | 1-Anilino-8-Naphthalene Sulfonate                                                          | -0.905 | -1.277 | 1.627  | 0.69   | -0.203 | 0.106 | 0.052 | 0.889 | 0.515 | 0.344 |
| DB01795 | Phenyl Boronic Acid                                                                        | -0.904 | -0.153 | 1.696  | -2.019 | -1.377 | 0.093 | 0.378 | 0.916 | 0.027 | 0.038 |
| DB01324 | Polythiazide                                                                               | -0.903 | -0.743 | -0.169 | -0.928 | -1.262 | 0.054 | 0.302 | 0.487 | 0.034 | 0.003 |
| DB09345 | Pramocaine                                                                                 | -0.903 | -0.8   | -0.169 | -0.928 | -1.168 | 0.054 | 0.23  | 0.487 | 0.034 | 0.009 |
| DB07506 | L-BENZYL SUCCINIC ACID                                                                     | -0.902 | -0.741 | -0.416 | -0.592 | -1.158 | 0.012 | 0.151 | 0.298 | 0.187 | 0.002 |
| DB01157 | Trimetrexate                                                                               | -0.901 | -0.609 | 1.383  | 0.422  | -0.906 | 0.154 | 0.213 | 0.861 | 0.524 | 0.146 |
| DB04555 | Cytidine-5'-Diphosphate                                                                    | -0.9   | -0.632 | -2.752 | -0.364 | -0.633 | 0.011 | 0.146 | 0     | 0.186 | 0.157 |
| DB00263 | Sulfisoxazole                                                                              | -0.898 | -0.855 | -0.049 | -0.814 | -1.115 | 0.046 | 0.159 | 0.497 | 0.068 | 0.011 |
| DB01230 | Pemoline                                                                                   | -0.898 | -0.796 | -0.238 | -0.955 | -1.11  | 0.119 | 0.275 | 0.461 | 0.043 | 0.029 |
| DB01463 | Fencamfamin                                                                                | -0.898 | -0.796 | -0.238 | -0.955 | -1.11  | 0.119 | 0.275 | 0.461 | 0.043 | 0.029 |
| DB06147 | Sulfathiazole                                                                              | -0.898 | -0.855 | -0.049 | -0.814 | -1.115 | 0.046 | 0.159 | 0.497 | 0.068 | 0.011 |

|         |                                                                                                                        |        |        |        |        |        |       |       |       |       |       |
|---------|------------------------------------------------------------------------------------------------------------------------|--------|--------|--------|--------|--------|-------|-------|-------|-------|-------|
| DB00082 | Pegvisomant                                                                                                            | -0.895 | -0.845 | -0.275 | -0.54  | -1.158 | 0.009 | 0.053 | 0.356 | 0.162 | 0.005 |
| DB09098 | Somatrem                                                                                                               | -0.895 | -0.845 | -0.275 | -0.54  | -1.158 | 0.009 | 0.053 | 0.356 | 0.162 | 0.005 |
| DB00730 | Thiabendazole                                                                                                          | -0.893 | -0.268 | 1.715  | -1.175 | -0.888 | 0.164 | 0.331 | 0.945 | 0.087 | 0.134 |
| DB03380 | L-tyrosinamide                                                                                                         | -0.893 | -0.709 | -1.469 | -0.643 | -1.171 | 0.005 | 0.158 | 0.002 | 0.116 | 0     |
| DB01367 | Rasagiline                                                                                                             | -0.89  | -0.621 | -0.645 | -0.507 | -0.976 | 0.064 | 0.194 | 0.086 | 0.199 | 0.083 |
| DB03397 | Uridine-Diphosphate-N-Acetylglucosamine                                                                                | -0.884 | -0.822 | -0.038 | -0.733 | -0.955 | 0.031 | 0.091 | 0.49  | 0.076 | 0.025 |
| DB02827 | 7-(1,1-Dioxo-1h-Benzo[D]Isothiazol-3-Yloxymethyl)-2-(Oxalyl-Amino)-4,7-Dihydro-5h-Thieno[2,3-C]Pyran-3-Carboxylic Acid | -0.882 | -0.28  | -0.085 | -0.103 | -1.649 | 0.071 | 0.346 | 0.131 | 0.307 | 0.007 |
| DB03670 | 2-(Oxalyl-Amino)-4,5,6,7-Tetrahydro-Thieno[2,3-C]Pyridine-3-Carboxylic Acid                                            | -0.882 | -0.28  | -0.085 | -0.103 | -1.649 | 0.071 | 0.346 | 0.131 | 0.307 | 0.007 |
| DB04204 | [(4-{4-[4-(Difluoro-Phosphono-Methyl)-Phenyl]-Butyl}-Phenyl)-Difluoro-Methyl]-Phosphonic Acid                          | -0.882 | -0.28  | -0.085 | -0.103 | -1.649 | 0.071 | 0.346 | 0.131 | 0.307 | 0.007 |
| DB07130 | 4-BROMO-3-(CARBOXYMETHOXY)-5-PHENYLTHIOPHENE-2-CARBOXYLIC ACID                                                         | -0.882 | -0.28  | -0.085 | -0.103 | -1.649 | 0.071 | 0.346 | 0.131 | 0.307 | 0.007 |
| DB08003 | ISOTHIAZOLIDINONE ANALOG                                                                                               | -0.882 | -0.28  | -0.085 | -0.103 | -1.649 | 0.071 | 0.346 | 0.131 | 0.307 | 0.007 |
| DB13144 | Lenograstim                                                                                                            | -0.877 | -0.818 | 0.074  | -1.308 | -0.988 | 0.039 | 0.125 | 0.565 | 0.006 | 0.025 |
| DB01281 | Abatacept                                                                                                              | -0.876 | -0.61  | -0.595 | -1.317 | -1.053 | 0.052 | 0.369 | 0.189 | 0     | 0.016 |
| DB06681 | Belatacept                                                                                                             | -0.876 | -0.61  | -0.595 | -1.317 | -1.053 | 0.052 | 0.369 | 0.189 | 0     | 0.016 |
| DB09046 | Metreleptin                                                                                                            | -0.871 | -0.815 | -0.388 | -0.655 | -0.932 | 0.026 | 0.106 | 0.29  | 0.119 | 0.036 |
| DB01752 | S-adenosyl-L-homocysteine                                                                                              | -0.868 | -1.551 | 0.796  | 1.116  | 0      | 0.15  | 0.044 | 0.677 | 0.75  | 0.402 |
| DB01168 | Procarbazine                                                                                                           | -0.866 | -0.644 | 0.02   | -0.616 | -1.194 | 0.034 | 0.232 | 0.53  | 0.204 | 0.007 |
| DB05630 | Sodium stibogluconate                                                                                                  | -0.866 | -0.275 | 0.425  | -3.18  | -1.415 | 0.019 | 0.401 | 0.585 | 0     | 0.002 |
| DB04447 | 1,4-Dithiothreitol                                                                                                     | -0.864 | -1.678 | -0.048 | 0.709  | 0.596  | 0.157 | 0.032 | 0.264 | 0.71  | 0.648 |
| DB09075 | Edoxaban                                                                                                               | -0.863 | -0.79  | -0.049 | -0.814 | -1.115 | 0.081 | 0.229 | 0.497 | 0.068 | 0.011 |
| DB00354 | Buclizine                                                                                                              | -0.862 | -0.795 | -0.398 | -0.967 | -1.06  | 0.139 | 0.281 | 0.373 | 0.04  | 0.02  |
| DB00443 | Betamethasone                                                                                                          | -0.861 | -0.16  | -1.11  | -1.437 | -0.765 | 0.134 | 0.336 | 0.091 | 0.061 | 0.149 |
| DB01392 | Yohimbine                                                                                                              | -0.859 | -0.923 | 2.846  | 0.124  | -0.873 | 0.176 | 0.149 | 0.998 | 0.465 | 0.155 |
| DB06729 | Sulfaphenazole                                                                                                         | -0.857 | 0.196  | -0.307 | -1.458 | -1.156 | 0.123 | 0.515 | 0.307 | 0.047 | 0.069 |
| DB01954 | Rolipram                                                                                                               | -0.849 | -0.708 | 1.008  | -1.205 | -0.818 | 0.024 | 0.13  | 0.8   | 0.04  | 0.089 |
| DB01959 | 3,5-Dimethyl-1-(3-Nitrophenyl)-1h-Pyrazole-4-Carboxylic Acid Ethyl Ester                                               | -0.849 | -0.708 | 1.008  | -1.205 | -0.818 | 0.024 | 0.13  | 0.8   | 0.04  | 0.089 |
| DB03849 | Cilomilast                                                                                                             | -0.849 | -0.708 | 1.008  | -1.205 | -0.818 | 0.024 | 0.13  | 0.8   | 0.04  | 0.089 |
| DB02644 | N-Omega-Propyl-L-Arginine                                                                                              | -0.848 | 0.312  | 0.916  | -0.717 | -2.622 | 0.15  | 0.584 | 0.693 | 0.152 | 0.001 |
| DB03449 | N-(4-(2-((3-Chlorophenylmethyl)Amino)Ethyl)Phenyl)-2-Thiophecarboxamidine                                              | -0.848 | 0.312  | 0.916  | -0.717 | -2.622 | 0.15  | 0.584 | 0.693 | 0.152 | 0.001 |
| DB07002 | 4-((4-[(4-methoxypyridin-2-yl)amino]piperidin-1-yl)carbonyl)benzoxonitrile                                             | -0.848 | 0.312  | 0.916  | -0.717 | -2.622 | 0.15  | 0.584 | 0.693 | 0.152 | 0.001 |
| DB08750 | 1-[4-(AMINOMETHYL)BENZOYL]-5'-FLUORO-1'H-SPIRO[PIPERIDINE-4,2'-QUINAZOLIN]-4'-AMINE                                    | -0.848 | 0.312  | 0.916  | -0.717 | -2.622 | 0.15  | 0.584 | 0.693 | 0.152 | 0.001 |
| DB01164 | Calcium Chloride                                                                                                       | -0.847 | -0.623 | -0.464 | -0.762 | -1.024 | 0.068 | 0.314 | 0.269 | 0.071 | 0.014 |
| DB00019 | Pegfilgrastim                                                                                                          | -0.843 | -0.778 | 0.176  | -1.312 | -0.669 | 0.035 | 0.106 | 0.484 | 0.031 | 0.146 |
| DB00072 | Trastuzumab                                                                                                            | -0.843 | -0.575 | 0.706  | -0.455 | -0.566 | 0.098 | 0.195 | 0.654 | 0.254 | 0.21  |
| DB00099 | Filgrastim                                                                                                             | -0.843 | -0.778 | 0.176  | -1.312 | -0.669 | 0.035 | 0.106 | 0.484 | 0.031 | 0.146 |
| DB00626 | Bacitracin                                                                                                             | -0.843 | -0.109 | 0.847  | 0.396  | -1.757 | 0.122 | 0.352 | 0.519 | 0.577 | 0.019 |
| DB09030 | Vorapaxar                                                                                                              | -0.843 | -0.863 | 0.079  | -0.677 | -0.821 | 0.064 | 0.095 | 0.554 | 0.106 | 0.081 |
| DB04105 | N-Heptylformamide                                                                                                      | -0.842 | -0.658 | 0.048  | -0.824 | -1.148 | 0.054 | 0.241 | 0.541 | 0.053 | 0.005 |
| DB00500 | Tolmetin                                                                                                               | -0.84  | -0.281 | 1.076  | -0.696 | -1.195 | 0.159 | 0.324 | 0.763 | 0.131 | 0.082 |
| DB09477 | Enalaprilat                                                                                                            | -0.839 | -0.767 | 0.106  | -0.647 | -0.866 | 0.105 | 0.252 | 0.592 | 0.237 | 0.1   |
| DB09105 | Asfotase alfa                                                                                                          | -0.838 | -0.711 | 0.041  | -0.7   | -1.032 | 0.053 | 0.18  | 0.569 | 0.098 | 0.012 |

|         |                                                                                                       |        |        |        |        |        |       |       |       |       |       |
|---------|-------------------------------------------------------------------------------------------------------|--------|--------|--------|--------|--------|-------|-------|-------|-------|-------|
| DB00962 | Zaleplon                                                                                              | -0.834 | -0.862 | 0.455  | -0.695 | -0.851 | 0.047 | 0.064 | 0.705 | 0.088 | 0.066 |
| DB02383 | Tolrestat                                                                                             | -0.833 | -0.889 | 0.934  | -1.268 | -1.326 | 0.038 | 0.06  | 0.816 | 0.028 | 0.004 |
| DB02712 | Sorbinil                                                                                              | -0.833 | -0.889 | 0.934  | -1.268 | -1.326 | 0.038 | 0.06  | 0.816 | 0.028 | 0.004 |
| DB04126 | N-[1-Hydroxycarboxyethyl-Carbonyl]Leucylamino-2-Methyl-Butane                                         | -0.833 | -0.112 | 0.3    | -2.863 | -1.022 | 0.064 | 0.476 | 0.513 | 0     | 0.047 |
| DB07450 | (R)-minalrestat                                                                                       | -0.833 | -0.889 | 0.934  | -1.268 | -1.326 | 0.038 | 0.06  | 0.816 | 0.028 | 0.004 |
| DB08772 | 3,4-DIHYDRO-4-OXO-3-((5-TRIFLUOROMETHYL-2-BENZOTHIAZOLYL)METHYL)-1-PHTHALAZINE ACETIC ACID            | -0.833 | -0.889 | 0.934  | -1.268 | -1.326 | 0.038 | 0.06  | 0.816 | 0.028 | 0.004 |
| DB02132 | Zenarestat                                                                                            | -0.832 | -0.771 | 0.074  | -0.662 | -1.099 | 0.029 | 0.095 | 0.545 | 0.099 | 0.017 |
| DB06837 | (2R)-N-4--hydroxy-2-(3-hydroxybenzyl)-N-1--[(1S,2R)-2-hydroxy-2,3-dihydro-1H-inden-1-yl]butanediamide | -0.832 | -0.712 | -0.269 | -0.872 | -1.058 | 0.098 | 0.274 | 0.421 | 0.043 | 0.019 |
| DB00783 | Estradiol                                                                                             | -0.829 | -0.549 | -0.531 | -0.01  | -0.929 | 0.095 | 0.202 | 0.236 | 0.454 | 0.119 |
| DB00928 | Azacitidine                                                                                           | -0.828 | 0.173  | -2.263 | -2.229 | 0.043  | 0.113 | 0.521 | 0.013 | 0.015 | 0.463 |
| DB01284 | Tetracosactide                                                                                        | -0.827 | -0.57  | -0.604 | -1.342 | -0.946 | 0.116 | 0.389 | 0.203 | 0.001 | 0.052 |
| DB02458 | S-(2,4-dinitrophenyl)glutathione                                                                      | -0.827 | -0.783 | -0.307 | -0.895 | -1.002 | 0.139 | 0.235 | 0.403 | 0.046 | 0.04  |
| DB02643 | N-Dodecyl-N,N-Dimethyl-3-Ammonio-1-Propanesulfonate                                                   | -0.826 | -0.657 | -0.493 | -0.629 | -1.09  | 0.034 | 0.193 | 0.24  | 0.103 | 0.01  |
| DB02196 | Uridine-Diphosphate-N-Acetylgalactosamine                                                             | -0.824 | -0.744 | -0.673 | -0.714 | -0.912 | 0.035 | 0.115 | 0.137 | 0.072 | 0.03  |
| DB04630 | Aldosterone                                                                                           | -0.823 | -0.641 | 0.351  | 0.41   | -1.801 | 0.11  | 0.186 | 0.501 | 0.424 | 0.009 |
| DB04480 | 3-(4-Fluorophenyl)-2-(6-Methylpyridin-2-Yl)-5,6-Dihydro-4h-Pyrrolo[1,2-B]Pyrazole                     | -0.82  | -0.262 | 0.168  | 0.402  | -1.114 | 0.149 | 0.342 | 0.194 | 0.523 | 0.087 |
| DB00987 | Cytarabine                                                                                            | -0.818 | 0.575  | -0.659 | -1.866 | -0.932 | 0.169 | 0.772 | 0.104 | 0.028 | 0.132 |
| DB01440 | gamma-Hydroxybutyric acid                                                                             | -0.818 | -0.661 | -0.212 | -0.854 | -1.017 | 0.107 | 0.306 | 0.435 | 0.052 | 0.025 |
| DB01861 | Uridine diphosphate glucose                                                                           | -0.818 | -0.661 | -0.212 | -0.854 | -1.017 | 0.107 | 0.306 | 0.435 | 0.052 | 0.025 |
| DB03056 | 4-Piperidino-Piperidine                                                                               | -0.818 | -0.677 | 0.116  | -0.894 | -1.017 | 0.145 | 0.338 | 0.575 | 0.038 | 0.03  |
| DB02056 | Prostaglandin D2                                                                                      | -0.815 | -0.691 | -0.338 | -0.817 | -1.029 | 0.04  | 0.166 | 0.32  | 0.051 | 0.01  |
| DB00691 | Moexipril                                                                                             | -0.813 | -0.779 | 0.325  | -0.52  | -0.92  | 0.107 | 0.203 | 0.653 | 0.274 | 0.052 |
| DB00977 | Ethinylestradiol                                                                                      | -0.813 | 0.085  | -1.188 | -1.464 | -1.232 | 0.128 | 0.447 | 0.084 | 0.057 | 0.061 |
| DB01382 | Glymidine                                                                                             | -0.812 | -0.663 | 0.21   | -0.618 | -0.956 | 0.092 | 0.301 | 0.623 | 0.225 | 0.044 |
| DB01643 | Thymidine monophosphate                                                                               | -0.811 | 0.342  | 0.968  | -3.166 | -1.405 | 0.133 | 0.62  | 0.733 | 0     | 0.044 |
| DB07711 | (2S,3R)-3-(6-amino-9H-purin-9-yl)nonan-2-ol                                                           | -0.809 | -0.65  | -1.525 | -1.343 | -1.112 | 0.064 | 0.217 | 0.001 | 0.002 | 0.005 |
| DB03059 | Acetoacetyl-CoA                                                                                       | -0.808 | -0.53  | 0.074  | -0.662 | -1.211 | 0.06  | 0.328 | 0.556 | 0.088 | 0.003 |
| DB03680 | Tartronate                                                                                            | -0.805 | -0.707 | -0.318 | -0.87  | -0.964 | 0.152 | 0.316 | 0.395 | 0.059 | 0.043 |
| DB04454 | Alpha-Aminobutyric Acid                                                                               | -0.805 | -0.754 | -0.043 | -0.679 | -0.989 | 0.063 | 0.122 | 0.478 | 0.095 | 0.025 |
| DB00086 | Streptokinase                                                                                         | -0.804 | -0.314 | 0.586  | -0.859 | -1.161 | 0.083 | 0.335 | 0.598 | 0.086 | 0.051 |
| DB02984 | 4-[3-Methylsulfanylanilino]-6,7-Dimethoxyquinazoline                                                  | -0.804 | -0.701 | 0.89   | -0.208 | -1.678 | 0.134 | 0.145 | 0.542 | 0.311 | 0.029 |
| DB02580 | Pentaglyme                                                                                            | -0.803 | -1.186 | 1.894  | -0.245 | 0.111  | 0.167 | 0.088 | 0.935 | 0.246 | 0.44  |
| DB06688 | Sipuleucel-T                                                                                          | -0.802 | -0.746 | -0.433 | -0.725 | -0.875 | 0.084 | 0.187 | 0.313 | 0.089 | 0.061 |
| DB00042 | Botulinum Toxin Type B                                                                                | -0.799 | -0.194 | 0.34   | 0.619  | -1.98  | 0.12  | 0.397 | 0.488 | 0.514 | 0.005 |
| DB02407 | 6-O-Cyclohexylmethyl Guanine                                                                          | -0.798 | -0.184 | -1.349 | -1.396 | -1.012 | 0.106 | 0.343 | 0.059 | 0.055 | 0.08  |
| DB06944 | N-(3-cyclopropyl-1H-pyrazol-5-yl)-2-(2-naphthyl)acetamide                                             | -0.798 | -0.184 | -1.349 | -1.396 | -1.012 | 0.106 | 0.343 | 0.059 | 0.055 | 0.08  |
| DB08572 | 4-[[4-AMINO-6-(CYCLOHEXYLMETHOXY)-5-NITROSOPYRIMIDIN-2-YL]AMINO]BENZAMIDE                             | -0.798 | -0.184 | -1.349 | -1.396 | -1.012 | 0.106 | 0.343 | 0.059 | 0.055 | 0.08  |
| DB03209 | Oteracil                                                                                              | -0.796 | -0.672 | 0.148  | -0.655 | -1.05  | 0.082 | 0.227 | 0.596 | 0.119 | 0.018 |
| DB05258 | Interferon alfa                                                                                       | -0.796 | -0.706 | -0.17  | -0.455 | -0.943 | 0.025 | 0.128 | 0.384 | 0.167 | 0.02  |
| DB04377 | Meglutol                                                                                              | -0.795 | -0.74  | 0.16   | -0.622 | -0.885 | 0.052 | 0.11  | 0.609 | 0.122 | 0.033 |
| DB06706 | Isometheptene                                                                                         | -0.794 | -0.721 | 0.112  | -0.895 | -1.002 | 0.18  | 0.307 | 0.58  | 0.046 | 0.04  |

|         |                                                                                                    |        |        |        |        |        |       |       |       |       |       |
|---------|----------------------------------------------------------------------------------------------------|--------|--------|--------|--------|--------|-------|-------|-------|-------|-------|
| DB00837 | Progabide                                                                                          | -0.792 | -0.774 | 0.686  | -0.624 | -0.932 | 0.044 | 0.09  | 0.751 | 0.108 | 0.03  |
| DB00998 | Frovatriptan                                                                                       | -0.792 | -0.709 | 0.272  | -0.443 | -0.849 | 0.061 | 0.145 | 0.618 | 0.265 | 0.071 |
| DB01586 | Ursodeoxycholic acid                                                                               | -0.792 | -0.465 | -0.742 | -0.468 | -1.309 | 0.066 | 0.268 | 0.098 | 0.164 | 0.013 |
| DB01080 | Vigabatrin                                                                                         | -0.791 | -0.781 | 0.702  | -0.647 | -0.939 | 0.033 | 0.085 | 0.749 | 0.093 | 0.034 |
| DB01590 | Everolimus                                                                                         | -0.791 | -0.334 | 0.076  | 0.381  | -0.44  | 0.175 | 0.315 | 0.175 | 0.505 | 0.253 |
| DB02062 | N-[3-[(1-Aminoethyl)(Hydroxy)Phosphoryl]-2-(1,1'-Biphenyl-4-Ylmethyl)Propanoyl]Alanine             | -0.791 | -0.585 | -2.304 | 0.737  | -0.225 | 0.089 | 0.205 | 0.002 | 0.579 | 0.356 |
| DB02210 | Hexane-1,6-Diol                                                                                    | -0.791 | -0.921 | 0.076  | -0.713 | -0.231 | 0.178 | 0.135 | 0.255 | 0.164 | 0.327 |
| DB00787 | Acyclovir                                                                                          | -0.79  | -0.589 | -0.859 | -0.505 | -1.231 | 0.027 | 0.208 | 0.017 | 0.157 | 0     |
| DB00841 | Dobutamine                                                                                         | -0.789 | -0.134 | 0.94   | -0.852 | -1.223 | 0.134 | 0.362 | 0.768 | 0.127 | 0.083 |
| DB03385 | 4-Methylimidazole                                                                                  | -0.789 | -0.629 | -0.108 | -1.265 | -1.113 | 0.082 | 0.266 | 0.464 | 0.007 | 0.009 |
| DB03837 | Morpholine-4-Carboxylic Acid (1-(3-Benzenesulfonyl-1-Phenethylallylcarbonyl)-3-Methylbutyl)-Amide  | -0.789 | -0.324 | 1.235  | -1.287 | 0.012  | 0.144 | 0.326 | 0.799 | 0.087 | 0.411 |
| DB00796 | Candesartan cilexetil                                                                              | -0.788 | -0.031 | 0.245  | -0.077 | -1.092 | 0.162 | 0.396 | 0.455 | 0.386 | 0.08  |
| DB03247 | Flavin mononucleotide                                                                              | -0.787 | -0.609 | -0.924 | -0.119 | -0.571 | 0.196 | 0.22  | 0.096 | 0.335 | 0.22  |
| DB08870 | Brentuximab vedotin                                                                                | -0.787 | -0.551 | -0.039 | -0.745 | -1.066 | 0.175 | 0.421 | 0.523 | 0.085 | 0.023 |
| DB09324 | Sulbactam                                                                                          | -0.787 | -0.621 | -0.039 | -0.745 | -0.959 | 0.175 | 0.345 | 0.523 | 0.085 | 0.064 |
| DB00178 | Ramipril                                                                                           | -0.786 | -0.704 | 0.404  | -0.339 | -0.815 | 0.108 | 0.227 | 0.681 | 0.425 | 0.078 |
| DB00211 | Midodrine                                                                                          | -0.786 | -1.218 | -0.593 | -0.86  | -0.629 | 0.118 | 0.091 | 0.221 | 0.128 | 0.146 |
| DB06757 | Manganese                                                                                          | -0.784 | -0.214 | 0.007  | -0.53  | -2.159 | 0.191 | 0.351 | 0.152 | 0.2   | 0.008 |
| DB06756 | Glycine betaine                                                                                    | -0.783 | -0.732 | -0.446 | -0.598 | -0.685 | 0.037 | 0.185 | 0.068 | 0.164 | 0.132 |
| DB00074 | Basiliximab                                                                                        | -0.782 | -1.07  | 0.011  | -0.003 | 0.379  | 0.184 | 0.115 | 0.341 | 0.413 | 0.53  |
| DB00551 | Acetohydroxamic acid                                                                               | -0.782 | -0.625 | 0.024  | -1.307 | -1.058 | 0.06  | 0.242 | 0.529 | 0.005 | 0.016 |
| DB03643 | CRA_1144                                                                                           | -0.782 | -0.705 | -0.337 | -0.548 | -0.912 | 0.039 | 0.124 | 0.285 | 0.12  | 0.05  |
| DB00008 | Peginterferon alfa-2a                                                                              | -0.78  | -0.476 | -0.638 | 0.05   | -0.819 | 0.064 | 0.242 | 0.037 | 0.3   | 0.096 |
| DB00011 | Interferon alfa-n1                                                                                 | -0.78  | -0.476 | -0.638 | 0.05   | -0.819 | 0.064 | 0.242 | 0.037 | 0.3   | 0.096 |
| DB00018 | Interferon alfa-n3                                                                                 | -0.78  | -0.476 | -0.638 | 0.05   | -0.819 | 0.064 | 0.242 | 0.037 | 0.3   | 0.096 |
| DB00022 | Peginterferon alfa-2b                                                                              | -0.78  | -0.476 | -0.638 | 0.05   | -0.819 | 0.064 | 0.242 | 0.037 | 0.3   | 0.096 |
| DB00034 | Interferon Alfa-2a, Recombinant                                                                    | -0.78  | -0.476 | -0.638 | 0.05   | -0.819 | 0.064 | 0.242 | 0.037 | 0.3   | 0.096 |
| DB00060 | Interferon beta-1a                                                                                 | -0.78  | -0.476 | -0.638 | 0.05   | -0.819 | 0.064 | 0.242 | 0.037 | 0.3   | 0.096 |
| DB00068 | Interferon beta-1b                                                                                 | -0.78  | -0.476 | -0.638 | 0.05   | -0.819 | 0.064 | 0.242 | 0.037 | 0.3   | 0.096 |
| DB00069 | Interferon alfacon-1                                                                               | -0.78  | -0.476 | -0.638 | 0.05   | -0.819 | 0.064 | 0.242 | 0.037 | 0.3   | 0.096 |
| DB00105 | Interferon alfa-2b                                                                                 | -0.78  | -0.476 | -0.638 | 0.05   | -0.819 | 0.064 | 0.242 | 0.037 | 0.3   | 0.096 |
| DB02139 | (2e)-N-Allyl-4-[[3-(4-Bromophenyl)-5-Fluoro-1-Methyl-1h-Indazol-6-Yl]Oxy]-N-Methyl-2-Buten-1-Amine | -0.78  | 0.006  | -0.886 | -0.891 | -1.379 | 0.163 | 0.48  | 0.152 | 0.119 | 0.035 |
| DB02339 | Allyl-(6-[3-(4-Bromo-Phenyl)-Benzofuran-6-Yloxy]-Hexyl)-Methyl-Amin                                | -0.78  | 0.006  | -0.886 | -0.891 | -1.379 | 0.163 | 0.48  | 0.152 | 0.119 | 0.035 |
| DB02544 | N-(6-[[3-(4-Bromophenyl)-1,2-Benzisothiazol-6-Yl]Oxy]Hexyl)-N-Methylprop-2-En-1-Amine              | -0.78  | 0.006  | -0.886 | -0.891 | -1.379 | 0.163 | 0.48  | 0.152 | 0.119 | 0.035 |
| DB03234 | (4'-[[Allyl(Methyl)Amino]Methyl]-1,1'-Biphenyl-4-Yl)(4-Bromophenyl)Methanone                       | -0.78  | 0.006  | -0.886 | -0.891 | -1.379 | 0.163 | 0.48  | 0.152 | 0.119 | 0.035 |
| DB03748 | Methyl-[4-(4-Piperidine-1-Ylmethyl-Phenyl)-Cyclohexyl]-Carbaminic Acid-(4-Chlorophenyl)-Ester      | -0.78  | 0.006  | -0.886 | -0.891 | -1.379 | 0.163 | 0.48  | 0.152 | 0.119 | 0.035 |
| DB03771 | Allyl-[4-[3-(4-Bromo-Phenyl)-Benzofuran-6-Yloxy]-but-2-Enyl]-Methyl-Amine                          | -0.78  | 0.006  | -0.886 | -0.891 | -1.379 | 0.163 | 0.48  | 0.152 | 0.119 | 0.035 |
| DB03888 | N-Allyl-6-[[3-(4-bromophenyl)-1-methyl-1H-indazol-6-yl]oxy]-N-methyl-1-hexanamine                  | -0.78  | 0.006  | -0.886 | -0.891 | -1.379 | 0.163 | 0.48  | 0.152 | 0.119 | 0.035 |



|         |                                                                                                                               |        |        |        |        |        |       |       |       |       |       |
|---------|-------------------------------------------------------------------------------------------------------------------------------|--------|--------|--------|--------|--------|-------|-------|-------|-------|-------|
| DB08458 | (4-BROMOPHENYL)[4-((2E)-4-[CYCLOPROPYL(METHYL)AMINO]BUT-2-ENYL)OXY)PHENYL]METHANONE                                           | -0.78  | 0.006  | -0.886 | -0.891 | -1.379 | 0.163 | 0.48  | 0.152 | 0.119 | 0.035 |
| DB04400 | L-erythro-7,8-dihydrobiopterin                                                                                                | -0.779 | 0.353  | 1.332  | -0.734 | -2.771 | 0.152 | 0.627 | 0.837 | 0.157 | 0.001 |
| DB02315 | Cyclic GMP                                                                                                                    | -0.775 | -0.114 | 0.271  | -1.789 | -1.28  | 0.071 | 0.459 | 0.482 | 0.009 | 0.027 |
| DB00489 | Sotalol                                                                                                                       | -0.774 | -0.061 | -1.829 | 0.343  | -1.451 | 0.181 | 0.441 | 0.02  | 0.53  | 0.044 |
| DB06043 | Olaratumab                                                                                                                    | -0.771 | -0.632 | 0.466  | -0.303 | -1.295 | 0.042 | 0.182 | 0.701 | 0.239 | 0     |
| DB00672 | Chlorpropamide                                                                                                                | -0.768 | 0.067  | -1.06  | -1.828 | -1.141 | 0.129 | 0.506 | 0.075 | 0.024 | 0.064 |
| DB04493 | Fructose-6-Phosphate                                                                                                          | -0.767 | -0.644 | 0.544  | -0.424 | -0.434 | 0.196 | 0.216 | 0.555 | 0.197 | 0.252 |
| DB06650 | Ofatumumab                                                                                                                    | -0.767 | -0.694 | -0.113 | -0.871 | -0.993 | 0.213 | 0.335 | 0.492 | 0.051 | 0.043 |
| DB08935 | Obinutuzumab                                                                                                                  | -0.767 | -0.694 | -0.113 | -0.871 | -0.993 | 0.213 | 0.335 | 0.492 | 0.051 | 0.043 |
| DB02910 | Octanoyl-Coenzyme A                                                                                                           | -0.766 | -0.73  | 0.179  | -0.596 | -0.886 | 0.056 | 0.112 | 0.586 | 0.106 | 0.039 |
| DB12332 | Rucaparib                                                                                                                     | -0.766 | -0.292 | -1.67  | -1.673 | 1.229  | 0.187 | 0.345 | 0.032 | 0.041 | 0.86  |
| DB08009 | 5-[(E)-(5-CHLORO-2-OXO-1,2-DIHYDRO-3H-INDOL-3-YLIDENE)METHYL]-N-[2-(DIETHYLAMINO)ETHYL]-2,4-DIMETHYL-1H-PYRROLE-3-CARBOXAMIDE | -0.765 | -0.309 | -0.68  | 0.522  | -1.633 | 0.146 | 0.298 | 0.135 | 0.64  | 0.034 |
| DB08605 | 6-METHYL-2-(PROPANE-1-SULFONYL)-2H-THIENO[3,2-D][1,2,3]DIAZABORININ-1-OL                                                      | -0.764 | -0.598 | 0.934  | -1.309 | -1.159 | 0.059 | 0.201 | 0.814 | 0.016 | 0.003 |
| DB01436 | Alfacalcidol                                                                                                                  | -0.763 | 0.164  | 0.8    | -0.742 | -0.473 | 0.185 | 0.537 | 0.656 | 0.158 | 0.251 |
| DB02363 | 2'-Monophosphoadenosine-5'-Diphosphate                                                                                        | -0.762 | -0.64  | 0.649  | -0.606 | -1.215 | 0.048 | 0.174 | 0.746 | 0.113 | 0.004 |
| DB02854 | Aetiocholanolone                                                                                                              | -0.76  | -1.051 | 0.22   | 0.762  | -0.925 | 0.19  | 0.108 | 0.427 | 0.549 | 0.122 |
| DB00179 | Masoprocol                                                                                                                    | -0.758 | -0.395 | -2.312 | -0.686 | 0.057  | 0.121 | 0.243 | 0.011 | 0.184 | 0.454 |
| DB02613 | Decylamine-N,N-Dimethyl-N-Oxide                                                                                               | -0.758 | -0.689 | -0.157 | -0.52  | -0.806 | 0.083 | 0.2   | 0.44  | 0.261 | 0.091 |
| DB08936 | Chlorcyclizine                                                                                                                | -0.758 | -0.698 | -0.54  | -0.552 | -0.631 | 0.076 | 0.138 | 0.078 | 0.19  | 0.184 |
| DB00871 | Terbutaline                                                                                                                   | -0.757 | 0.842  | -1.747 | -0.92  | -1.883 | 0.185 | 0.762 | 0.025 | 0.108 | 0.017 |
| DB00350 | Minoxidil                                                                                                                     | -0.756 | -0.626 | 1.147  | -1.324 | -0.865 | 0.057 | 0.177 | 0.868 | 0.008 | 0.039 |
| DB00487 | Pefloxacin                                                                                                                    | -0.755 | -0.469 | 0.407  | -1.08  | -0.308 | 0.147 | 0.26  | 0.504 | 0.091 | 0.333 |
| DB04325 | Phenethylamine                                                                                                                | -0.755 | -0.758 | 0.111  | -0.612 | -0.94  | 0.057 | 0.094 | 0.563 | 0.118 | 0.044 |
| DB04360 | Benzo[B]Thiophene-2-Boronic Acid                                                                                              | -0.755 | -0.548 | 0.341  | -1.334 | -0.889 | 0.047 | 0.243 | 0.633 | 0.021 | 0.049 |
| DB02010 | Staurosporine                                                                                                                 | -0.747 | -0.83  | 0.025  | -1.146 | -0.168 | 0.11  | 0.131 | 0.428 | 0.094 | 0.375 |
| DB02767 | 3-Hydroxy-Myristic Acid                                                                                                       | -0.747 | -0.552 | 0.586  | 0.307  | -1.196 | 0.083 | 0.224 | 0.688 | 0.593 | 0.024 |
| DB04654 | 4-PIPERIDIN-4-YLBUTANAL                                                                                                       | -0.745 | -0.87  | 0.428  | -0.4   | -0.659 | 0.068 | 0.031 | 0.688 | 0.184 | 0.141 |
| DB08995 | Diosmin                                                                                                                       | -0.744 | -0.792 | -0.83  | -0.143 | -0.694 | 0.178 | 0.156 | 0.168 | 0.347 | 0.171 |
| DB00357 | Aminoglutethimide                                                                                                             | -0.743 | -0.495 | 0.35   | -0.705 | -1.238 | 0.065 | 0.348 | 0.642 | 0.067 | 0.002 |
| DB00855 | Aminolevulinic acid                                                                                                           | -0.74  | -0.555 | 0.034  | -0.762 | -0.924 | 0.201 | 0.405 | 0.551 | 0.071 | 0.048 |
| DB02115 | Daidzin                                                                                                                       | -0.74  | -0.392 | 0.183  | 0.014  | -1.359 | 0.086 | 0.309 | 0.464 | 0.27  | 0.009 |
| DB03904 | Urea                                                                                                                          | -0.738 | -0.83  | 0.4    | -2.535 | -1.16  | 0.143 | 0.123 | 0.365 | 0.007 | 0.069 |
| DB00146 | Calcifediol                                                                                                                   | -0.737 | -0.265 | 0.478  | 0.345  | -1.314 | 0.079 | 0.371 | 0.593 | 0.465 | 0.005 |
| DB00910 | Paricalcitol                                                                                                                  | -0.737 | -0.265 | 0.478  | 0.345  | -1.314 | 0.079 | 0.371 | 0.593 | 0.465 | 0.005 |
| DB01070 | Dihydratachysterol                                                                                                            | -0.737 | -0.265 | 0.478  | 0.345  | -1.314 | 0.079 | 0.371 | 0.593 | 0.465 | 0.005 |
| DB04014 | Alsterpauone                                                                                                                  | -0.737 | -0.321 | -0.167 | -0.996 | -1.064 | 0.121 | 0.265 | 0.353 | 0.103 | 0.091 |
| DB05295 | Eldecacitol                                                                                                                   | -0.737 | -0.265 | 0.478  | 0.345  | -1.314 | 0.079 | 0.371 | 0.593 | 0.465 | 0.005 |
| DB06410 | Doxercalciferol                                                                                                               | -0.737 | -0.265 | 0.478  | 0.345  | -1.314 | 0.079 | 0.371 | 0.593 | 0.465 | 0.005 |
| DB00315 | Zolmitriptan                                                                                                                  | -0.736 | -0.73  | 1.233  | 0.195  | -0.552 | 0.071 | 0.108 | 0.851 | 0.557 | 0.188 |
| DB00952 | Naratriptan                                                                                                                   | -0.736 | -0.73  | 1.233  | 0.195  | -0.552 | 0.071 | 0.108 | 0.851 | 0.557 | 0.188 |
| DB07637 | Dibromotyrosine                                                                                                               | -0.736 | -0.588 | 0.156  | -0.702 | -1.07  | 0.079 | 0.283 | 0.598 | 0.08  | 0.007 |
| DB01031 | Ethinamate                                                                                                                    | -0.734 | -0.542 | 0.42   | -1.315 | -1.059 | 0.096 | 0.332 | 0.684 | 0.006 | 0.009 |
| DB01650 | trans-2-hydroxycinnamic acid                                                                                                  | -0.734 | -0.542 | 0.42   | -1.315 | -1.059 | 0.096 | 0.332 | 0.684 | 0.006 | 0.009 |
| DB02362 | Aminobenzoic acid                                                                                                             | -0.734 | -0.542 | 0.42   | -1.315 | -1.059 | 0.096 | 0.332 | 0.684 | 0.006 | 0.009 |
| DB03728 | p-Chlorobenzoic acid                                                                                                          | -0.734 | -0.542 | 0.42   | -1.315 | -1.059 | 0.096 | 0.332 | 0.684 | 0.006 | 0.009 |
| DB04500 | Acedoben                                                                                                                      | -0.734 | -0.542 | 0.42   | -1.315 | -1.059 | 0.096 | 0.332 | 0.684 | 0.006 | 0.009 |
| DB06263 | Amrubicin                                                                                                                     | -0.734 | -0.671 | 0.246  | -1.332 | -0.39  | 0.068 | 0.156 | 0.529 | 0.02  | 0.321 |

|         |                                                                                    |        |        |        |        |        |       |       |       |       |       |
|---------|------------------------------------------------------------------------------------|--------|--------|--------|--------|--------|-------|-------|-------|-------|-------|
| DB08155 | N-{2-[4-(AMINOSULFONYL)PHENYL]ETHYL}ACETAMIDE                                      | -0.734 | -0.542 | 0.42   | -1.315 | -1.059 | 0.096 | 0.332 | 0.684 | 0.006 | 0.009 |
| DB08156 | 3-[4-(AMINOSULFONYL)PHENYL]PROPANOIC ACID                                          | -0.734 | -0.542 | 0.42   | -1.315 | -1.059 | 0.096 | 0.332 | 0.684 | 0.006 | 0.009 |
| DB08157 | ETHYL 3-[4-(AMINOSULFONYL)PHENYL]PROPANOATE                                        | -0.734 | -0.542 | 0.42   | -1.315 | -1.059 | 0.096 | 0.332 | 0.684 | 0.006 | 0.009 |
| DB08748 | 4-(DIMETHYLAMINO)BENZOIC ACID                                                      | -0.734 | -0.542 | 0.42   | -1.315 | -1.059 | 0.096 | 0.332 | 0.684 | 0.006 | 0.009 |
| DB09047 | Finaxofloxacin                                                                     | -0.734 | -0.671 | 0.246  | -1.332 | -0.39  | 0.068 | 0.156 | 0.529 | 0.02  | 0.321 |
| DB09353 | Octasulfur                                                                         | -0.734 | -0.542 | 0.42   | -1.315 | -1.059 | 0.096 | 0.332 | 0.684 | 0.006 | 0.009 |
| DB09472 | Sodium sulfate                                                                     | -0.734 | -0.542 | 0.42   | -1.315 | -1.059 | 0.096 | 0.332 | 0.684 | 0.006 | 0.009 |
| DB00147 | Pyridoxal                                                                          | -0.732 | -0.57  | 0.396  | -0.489 | -1.044 | 0.157 | 0.347 | 0.672 | 0.301 | 0.019 |
| DB01020 | Isosorbide Mononitrate                                                             | -0.732 | -0.597 | -0.624 | -0.793 | -0.917 | 0.176 | 0.395 | 0.195 | 0.064 | 0.05  |
| DB07688 | 4-[[5-(CYCLOHEXYLOXY)[1,2,4]TRIAZOLO[1,5-A]PYRIMIDIN-7-YL]AMINO}BENZENESULFONAMIDE | -0.731 | -0.244 | -0.872 | -0.787 | -0.67  | 0.144 | 0.303 | 0.128 | 0.148 | 0.154 |
| DB06751 | Drotaverine                                                                        | -0.73  | -0.689 | 0.722  | -0.151 | -1.017 | 0.078 | 0.143 | 0.709 | 0.22  | 0.054 |
| DB00365 | Grepafoxacin                                                                       | -0.729 | -0.576 | 0.041  | -0.7   | -0.929 | 0.156 | 0.345 | 0.569 | 0.098 | 0.028 |
| DB00976 | Telithromycin                                                                      | -0.729 | -0.576 | 0.041  | -0.7   | -0.929 | 0.156 | 0.345 | 0.569 | 0.098 | 0.028 |
| DB06708 | Lumefantrine                                                                       | -0.729 | -0.576 | 0.041  | -0.7   | -0.929 | 0.156 | 0.345 | 0.569 | 0.098 | 0.028 |
| DB08903 | Bedaquiline                                                                        | -0.729 | -0.576 | 0.041  | -0.7   | -0.929 | 0.156 | 0.345 | 0.569 | 0.098 | 0.028 |
| DB09102 | Daclatasvir                                                                        | -0.729 | -0.576 | 0.041  | -0.7   | -0.929 | 0.156 | 0.345 | 0.569 | 0.098 | 0.028 |
| DB09352 | Hydroxyamphetamine                                                                 | -0.729 | -0.576 | 0.041  | -0.7   | -0.929 | 0.156 | 0.345 | 0.569 | 0.098 | 0.028 |
| DB11614 | Rupatadine                                                                         | -0.729 | -0.588 | -0.075 | -0.755 | -0.913 | 0.188 | 0.339 | 0.495 | 0.073 | 0.05  |
| DB00548 | Azelaic acid                                                                       | -0.728 | -0.642 | -0.114 | -0.687 | -0.975 | 0.189 | 0.327 | 0.482 | 0.157 | 0.035 |
| DB01046 | Lubiprostone                                                                       | -0.727 | -0.669 | 0.138  | -0.672 | -0.94  | 0.089 | 0.19  | 0.606 | 0.093 | 0.022 |
| DB00181 | Baclofen                                                                           | -0.725 | -0.173 | -0.484 | -1.796 | -0.663 | 0.12  | 0.312 | 0.227 | 0.026 | 0.149 |
| DB00192 | Indecainide                                                                        | -0.724 | -0.656 | 0.108  | -0.672 | -1.02  | 0.146 | 0.266 | 0.569 | 0.103 | 0.03  |
| DB00218 | Moxifloxacin                                                                       | -0.724 | -0.429 | 0.417  | -1.434 | -0.415 | 0.136 | 0.273 | 0.567 | 0.036 | 0.264 |
| DB00680 | Moricizine                                                                         | -0.724 | -0.656 | 0.108  | -0.672 | -1.02  | 0.146 | 0.266 | 0.569 | 0.103 | 0.03  |
| DB00776 | Oxcarbazepine                                                                      | -0.724 | -0.656 | 0.108  | -0.672 | -1.02  | 0.146 | 0.266 | 0.569 | 0.103 | 0.03  |
| DB00868 | Benzonate                                                                          | -0.724 | -0.656 | 0.108  | -0.672 | -1.02  | 0.146 | 0.266 | 0.569 | 0.103 | 0.03  |
| DB00978 | Lomefloxacin                                                                       | -0.724 | -0.429 | 0.417  | -1.434 | -0.415 | 0.136 | 0.273 | 0.567 | 0.036 | 0.264 |
| DB01056 | Tocainide                                                                          | -0.724 | -0.656 | 0.108  | -0.672 | -1.02  | 0.146 | 0.266 | 0.569 | 0.103 | 0.03  |
| DB01320 | Fosphenytoin                                                                       | -0.724 | -0.656 | 0.108  | -0.672 | -1.02  | 0.146 | 0.266 | 0.569 | 0.103 | 0.03  |
| DB03808 | Hexamidine                                                                         | -0.724 | -0.888 | 0.389  | 0.299  | 0.069  | 0.134 | 0.104 | 0.523 | 0.364 | 0.473 |
| DB04576 | Fleroxacin                                                                         | -0.724 | -0.429 | 0.417  | -1.434 | -0.415 | 0.136 | 0.273 | 0.567 | 0.036 | 0.264 |
| DB08168 | 7-AMINO-4-METHYL-CHROMEN-2-ONE                                                     | -0.724 | -0.995 | 0.537  | -1.062 | -0.03  | 0.197 | 0.135 | 0.52  | 0.109 | 0.409 |
| DB00816 | Orciprenaline                                                                      | -0.723 | -0.334 | -1.814 | 0.143  | -1.32  | 0.16  | 0.365 | 0.006 | 0.459 | 0.03  |
| DB00901 | Bitolterol                                                                         | -0.723 | -0.334 | -1.814 | 0.143  | -1.32  | 0.16  | 0.365 | 0.006 | 0.459 | 0.03  |
| DB08066 | N-[3-(1H-BENZIMIDAZOL-2-YL)-1H-PYRAZOL-4-YL]BENZAMIDE                              | -0.723 | 0.168  | -0.757 | -1.733 | -0.946 | 0.147 | 0.489 | 0.155 | 0.025 | 0.096 |
| DB13139 | Levosalbutamol                                                                     | -0.723 | -0.334 | -1.814 | 0.143  | -1.32  | 0.16  | 0.365 | 0.006 | 0.459 | 0.03  |
| DB02742 | Kifunensine                                                                        | -0.722 | -0.55  | -0.479 | -0.68  | -0.855 | 0.128 | 0.306 | 0.238 | 0.079 | 0.054 |
| DB01005 | Hydroxyurea                                                                        | -0.719 | -0.621 | 0.562  | -0.35  | -1.171 | 0.039 | 0.149 | 0.722 | 0.227 | 0.001 |
| DB02110 | Protoporphyrin IX Containing Co                                                    | -0.718 | -0.787 | 1.378  | -0.998 | -0.563 | 0.048 | 0.075 | 0.883 | 0.042 | 0.161 |
| DB03413 | Deoxyuridine-5'-Diphosphate                                                        | -0.718 | -0.636 | 0.118  | -0.687 | -0.842 | 0.189 | 0.292 | 0.573 | 0.099 | 0.067 |
| DB01656 | Roflumilast                                                                        | -0.717 | -0.318 | 1.025  | -0.866 | -0.624 | 0.167 | 0.311 | 0.753 | 0.105 | 0.187 |
| DB03606 | (S)-Rolipram                                                                       | -0.717 | -0.318 | 1.025  | -0.866 | -0.624 | 0.167 | 0.311 | 0.753 | 0.105 | 0.187 |
| DB04149 | (R)-Rolipram                                                                       | -0.717 | -0.318 | 1.025  | -0.866 | -0.624 | 0.167 | 0.311 | 0.753 | 0.105 | 0.187 |
| DB01011 | Metyrapone                                                                         | -0.715 | -0.378 | 0.695  | -0.154 | -0.879 | 0.238 | 0.57  | 0.738 | 0.549 | 0.08  |
| DB05314 |                                                                                    | -0.715 | -0.048 | 1.766  | 0.714  | -1.456 | 0.155 | 0.443 | 0.917 | 0.568 | 0.025 |

|         |                                                                                                            |        |        |        |        |        |       |       |       |       |       |
|---------|------------------------------------------------------------------------------------------------------------|--------|--------|--------|--------|--------|-------|-------|-------|-------|-------|
| DB08094 | (4-AMINO-2-[[1-(METHYLSULFONYL)PIPERIDIN-4-YL]AMINO]PYRIMIDIN-5-YL)(2,3-DIFLUORO-6-METHOXYPHENYL)METHANONE | -0.715 | -0.832 | 0.161  | 0.135  | -0.791 | 0.183 | 0.154 | 0.514 | 0.492 | 0.158 |
| DB03559 | Cyclohexylformamide                                                                                        | -0.714 | -0.489 | 0.485  | -0.45  | -1     | 0.106 | 0.337 | 0.675 | 0.253 | 0.024 |
| DB00615 | Rifabutin                                                                                                  | -0.713 | -1.202 | -0.866 | -0.488 | -0.124 | 0.126 | 0.071 | 0.101 | 0.218 | 0.332 |
| DB09120 | Zucapsaicin                                                                                                | -0.712 | -0.582 | 0.055  | -0.65  | -0.97  | 0.123 | 0.291 | 0.561 | 0.082 | 0.029 |
| DB00335 | Atenolol                                                                                                   | -0.711 | 0.188  | -1.823 | 0.324  | -1.74  | 0.187 | 0.537 | 0.014 | 0.509 | 0.021 |
| DB02764 |                                                                                                            | -0.711 | -0.758 | 0.111  | -0.612 | -0.801 | 0.096 | 0.094 | 0.563 | 0.118 | 0.085 |
| DB03976 | Phosphorylisopropane                                                                                       | -0.711 | -0.758 | 0.635  | -0.275 | -0.801 | 0.096 | 0.094 | 0.74  | 0.363 | 0.085 |
| DB00872 | Conivaptan                                                                                                 | -0.71  | -0.591 | -0.489 | -0.692 | -0.825 | 0.097 | 0.239 | 0.233 | 0.075 | 0.069 |
| DB06212 | Tolvaptan                                                                                                  | -0.71  | -0.591 | -0.489 | -0.692 | -0.825 | 0.097 | 0.239 | 0.233 | 0.075 | 0.069 |
| DB07584 | N-[2-(5-methyl-4H-1,2,4-triazol-3-yl)phenyl]-7H-pyrrolo[2,3-d]pyrimidin-4-amine                            | -0.71  | -1.373 | -0.359 | -0.596 | 0.267  | 0.155 | 0.054 | 0.215 | 0.196 | 0.51  |
| DB07585 | 5-(5-chloro-7H-pyrrolo[2,3-d]pyrimidin-4-yl)-4,5,6,7-tetrahydro-1H-imidazo[4,5-c]pyridine                  | -0.71  | -1.373 | -0.359 | -0.596 | 0.267  | 0.155 | 0.054 | 0.215 | 0.196 | 0.51  |
| DB07162 | 4-(3-amino-1H-indazol-5-yl)-N-tert-butylbenzenesulfonamide                                                 | -0.709 | 0.029  | -0.995 | 0.238  | -1.4   | 0.191 | 0.452 | 0.129 | 0.447 | 0.044 |
| DB00558 | Zanamivir                                                                                                  | -0.707 | -0.681 | 0.086  | -0.633 | -0.777 | 0.119 | 0.162 | 0.56  | 0.101 | 0.104 |
| DB03262 | AI-6619, [2h-Thieno[3,2-E]-1,2-Thiazine-6-Sulfonamide,2-(3-Hydroxyphenyl)-3-(4-Morpholinyl)-, 1,1-Dioxide] | -0.707 | -0.512 | 0.604  | -0.965 | -1.053 | 0.119 | 0.333 | 0.732 | 0.064 | 0.011 |
| DB03598 | AI-6629, [2h-Thieno[3,2-E]-1,2-Thiazine-6-Sulfonamide,2-(3-Methoxyphenyl)-3-(4-Morpholinyl)-, 1,1-Dioxide] | -0.707 | -0.512 | 0.604  | -0.965 | -1.053 | 0.119 | 0.333 | 0.732 | 0.064 | 0.011 |
| DB08694 | 9-amino-5-(2-aminopyrimidin-4-yl)pyrido[3',2':4,5]pyrrolo[1,2-c]pyrimidin-4-ol                             | -0.706 | 0.436  | -2.13  | 0.162  | -1.166 | 0.196 | 0.631 | 0.008 | 0.416 | 0.072 |
| DB02648 | (3-Carboxy-2-(R)-Hydroxy-Propyl)-Trimethyl-Ammonium                                                        | -0.704 | -0.495 | 0.075  | -0.65  | -1.074 | 0.149 | 0.391 | 0.552 | 0.084 | 0.008 |
| DB09130 | Copper                                                                                                     | -0.703 | -1.542 | 0.025  | -0.122 | -0.425 | 0.177 | 0.067 | 0.473 | 0.334 | 0.23  |
| DB06809 | Plerixafor                                                                                                 | -0.7   | -0.017 | -2.535 | -0.624 | -0.363 | 0.15  | 0.443 | 0.002 | 0.151 | 0.266 |
| DB00825 | Levomenthol                                                                                                | -0.697 | -0.442 | -0.346 | -0.718 | -1.144 | 0.078 | 0.285 | 0.257 | 0.1   | 0.011 |
| DB00140 | Riboflavin                                                                                                 | -0.696 | -0.694 | -0.381 | -0.474 | -0.325 | 0.151 | 0.156 | 0.261 | 0.236 | 0.271 |
| DB02054 | Gabaculine                                                                                                 | -0.691 | -0.328 | 1.465  | -1.308 | -1.588 | 0.11  | 0.336 | 0.887 | 0.043 | 0.01  |
| DB06914 | 1-((2-[2-(4-CHLOROPHENYL)ETHYL]-1,3-DIOXOLAN-2-YL)METHYL)-1H-IMIDAZOLE                                     | -0.691 | -0.477 | 0.909  | -0.123 | -1.212 | 0.107 | 0.251 | 0.781 | 0.244 | 0.035 |
| DB00533 | Rofecoxib                                                                                                  | -0.69  | -0.623 | 1.474  | -0.975 | -1.112 | 0.189 | 0.221 | 0.864 | 0.083 | 0.079 |
| DB04092 | Apstatin                                                                                                   | -0.689 | -0.708 | 1.362  | 0.191  | -0.876 | 0.144 | 0.152 | 0.849 | 0.331 | 0.105 |
| DB09302 | Alirocumab                                                                                                 | -0.688 | -0.456 | 0.138  | -1.265 | -0.94  | 0.138 | 0.463 | 0.606 | 0.006 | 0.022 |
| DB09303 | Evolocumab                                                                                                 | -0.688 | -0.456 | 0.138  | -1.265 | -0.94  | 0.138 | 0.463 | 0.606 | 0.006 | 0.022 |
| DB00639 | Butoconazole                                                                                               | -0.687 | -0.726 | -1.06  | -1.002 | -0.41  | 0.152 | 0.154 | 0.075 | 0.077 | 0.224 |
| DB04545 | Afegostat                                                                                                  | -0.687 | 0.345  | 0.492  | 0.338  | -2.463 | 0.153 | 0.701 | 0.583 | 0.372 | 0     |
| DB00281 | Lidocaine                                                                                                  | -0.686 | -0.13  | 1.587  | 1.187  | -1.308 | 0.178 | 0.366 | 0.912 | 0.856 | 0.061 |
| DB00320 | Dihydroergotamine                                                                                          | -0.686 | -0.65  | 2.645  | 0.652  | -0.113 | 0.213 | 0.206 | 0.994 | 0.699 | 0.39  |
| DB00012 | Darbepoetin alfa                                                                                           | -0.684 | -0.398 | -0.082 | -0.373 | -1.092 | 0.105 | 0.415 | 0.383 | 0.192 | 0.011 |
| DB00016 | Erythropoietin                                                                                             | -0.684 | -0.398 | -0.082 | -0.373 | -1.092 | 0.105 | 0.415 | 0.383 | 0.192 | 0.011 |
| DB00301 | Flucloxacillin                                                                                             | -0.684 | -0.47  | -0.841 | -0.54  | -0.904 | 0.152 | 0.427 | 0.018 | 0.162 | 0.052 |
| DB00560 | Tigecycline                                                                                                | -0.684 | -0.47  | -0.841 | -0.54  | -0.904 | 0.152 | 0.427 | 0.018 | 0.162 | 0.052 |
| DB04933 | Eritoran                                                                                                   | -0.684 | -0.499 | -0.082 | -0.373 | -1.092 | 0.105 | 0.319 | 0.383 | 0.192 | 0.011 |
| DB08740 | CYCLOHEXYLMETHYL-2,3-DIHYDROXY-5-METHYL-HEXYLAMIDE                                                         | -0.684 | -0.701 | -0.082 | -1.191 | -0.935 | 0.105 | 0.146 | 0.383 | 0.025 | 0.03  |
| DB08894 | Peginesatide                                                                                               | -0.684 | -0.398 | -0.082 | -0.373 | -1.092 | 0.105 | 0.415 | 0.383 | 0.192 | 0.011 |

|         |                                                                                                            |        |        |        |        |        |       |       |       |       |       |
|---------|------------------------------------------------------------------------------------------------------------|--------|--------|--------|--------|--------|-------|-------|-------|-------|-------|
| DB08923 |                                                                                                            | -0.684 | -0.398 | -0.082 | -0.373 | -1.092 | 0.105 | 0.415 | 0.383 | 0.192 | 0.011 |
| DB09107 | Methoxy polyethylene glycol-epoetin beta                                                                   | -0.684 | -0.398 | -0.082 | -0.373 | -1.092 | 0.105 | 0.415 | 0.383 | 0.192 | 0.011 |
| DB00282 | Pamidronic acid                                                                                            | -0.682 | -0.521 | 0.16   | -0.622 | -0.885 | 0.167 | 0.366 | 0.609 | 0.122 | 0.033 |
| DB00710 | Ibandronate                                                                                                | -0.682 | -0.521 | 0.16   | -0.622 | -0.885 | 0.167 | 0.366 | 0.609 | 0.122 | 0.033 |
| DB00861 | Diflunisal                                                                                                 | -0.682 | -1.375 | 2.21   | -1.274 | -0.156 | 0.203 | 0.06  | 0.979 | 0.074 | 0.347 |
| DB00884 | Risedronic acid                                                                                            | -0.682 | -0.521 | 0.16   | -0.622 | -0.885 | 0.167 | 0.366 | 0.609 | 0.122 | 0.033 |
| DB06255 | Incadronic acid                                                                                            | -0.682 | -0.521 | 0.16   | -0.622 | -0.885 | 0.167 | 0.366 | 0.609 | 0.122 | 0.033 |
| DB11620 | Neridronic Acid                                                                                            | -0.682 | -0.521 | 0.16   | -0.622 | -0.885 | 0.167 | 0.366 | 0.609 | 0.122 | 0.033 |
| DB00196 | Fluconazole                                                                                                | -0.681 | -0.259 | -0.093 | -0.515 | -0.789 | 0.176 | 0.259 | 0.298 | 0.205 | 0.129 |
| DB03403 | Cytidine-5'-Monophosphate                                                                                  | -0.681 | 0.178  | -3.088 | -0.134 | -0.932 | 0.103 | 0.674 | 0     | 0.231 | 0.065 |
| DB08910 | Pomalidomide                                                                                               | -0.681 | -0.752 | -2.159 | -0.002 | -0.769 | 0.198 | 0.182 | 0.009 | 0.349 | 0.155 |
| DB00026 | Anakinra                                                                                                   | -0.68  | -0.562 | 0.118  | -0.687 | -0.842 | 0.251 | 0.368 | 0.573 | 0.099 | 0.067 |
| DB00705 | Delavirdine                                                                                                | -0.68  | -0.572 | 1.131  | 0.055  | -0.794 | 0.069 | 0.186 | 0.836 | 0.488 | 0.065 |
| DB03316 | 1,4-Diethylene Dioxide                                                                                     | -0.68  | -0.673 | 1.205  | -1.125 | -0.555 | 0.124 | 0.156 | 0.833 | 0.055 | 0.19  |
| DB03861 | (2r,3r,4s,5r)-2-Acetamido-3,4-Dihydroxy-5-Hydroxymethyl-Piperidinium                                       | -0.68  | -0.49  | -0.596 | -0.771 | -0.905 | 0.18  | 0.394 | 0.165 | 0.068 | 0.068 |
| DB01022 | Phylloquinone                                                                                              | -0.679 | -0.632 | 0.118  | -0.643 | -0.922 | 0.113 | 0.232 | 0.567 | 0.116 | 0.032 |
| DB05266 | Ibudilast                                                                                                  | -0.679 | 0.147  | 1.181  | -0.679 | -1.102 | 0.197 | 0.509 | 0.807 | 0.136 | 0.09  |
| DB07771 | [(3,7,11-TRIMETHYL-DODECA-2,6,10-TRIENYLOXYCARBAMOYL)-METHYL]-PHOSPHONIC ACID                              | -0.677 | 0.246  | 1.035  | 1.126  | -1.273 | 0.205 | 0.532 | 0.744 | 0.709 | 0.061 |
| DB08371 | PARA-(BENZOYL)-PHENYLALANINE                                                                               | -0.676 | -0.352 | -0.145 | -0.149 | -0.628 | 0.172 | 0.311 | 0.12  | 0.31  | 0.18  |
| DB00667 |                                                                                                            | -0.675 | -0.473 | 0.12   | -0.368 | -0.82  | 0.212 | 0.469 | 0.573 | 0.394 | 0.086 |
| DB00927 | Famotidine                                                                                                 | -0.675 | -0.612 | 0.396  | -0.606 | -0.218 | 0.17  | 0.193 | 0.473 | 0.182 | 0.283 |
| DB05318 |                                                                                                            | -0.675 | -0.516 | 0.618  | -1.35  | -0.862 | 0.09  | 0.252 | 0.75  | 0.01  | 0.045 |
| DB05891 |                                                                                                            | -0.675 | -0.473 | 0.12   | -0.368 | -0.82  | 0.212 | 0.469 | 0.573 | 0.394 | 0.086 |
| DB11320 |                                                                                                            | -0.675 | -0.473 | 0.12   | -0.368 | -0.82  | 0.212 | 0.469 | 0.573 | 0.394 | 0.086 |
| DB03978 | Tyrosinal                                                                                                  | -0.668 | -0.431 | 0.17   | -0.054 | -0.902 | 0.108 | 0.268 | 0.465 | 0.285 | 0.086 |
| DB07562 | N-[4-(2,4-DIMETHYL-THIAZOL-5-YL)-PYRIMIDIN-2-YL]-N',N'-DIMETHYL-BENZENE-1,4-DIAMINE                        | -0.668 | 0.237  | -1.207 | -1.478 | -0.476 | 0.157 | 0.531 | 0.087 | 0.045 | 0.204 |
| DB07644 | 5-[(1S)-1-(3-chlorophenyl)ethoxy]quinazoline-2,4-diamine                                                   | -0.668 | -0.689 | 1.036  | 0.045  | -1.11  | 0.098 | 0.134 | 0.805 | 0.281 | 0.028 |
| DB01528 | 4-Methyl-2,5-dimethoxyamphetamine                                                                          | -0.667 | -0.61  | 0.087  | -0.667 | -1.093 | 0.17  | 0.243 | 0.567 | 0.099 | 0.016 |
| DB02059 | Adenosine-5-Diphosphoribose                                                                                | -0.667 | -0.633 | 0.495  | -0.352 | -1.156 | 0.201 | 0.217 | 0.359 | 0.296 | 0.089 |
| DB06210 | Eltrombopag                                                                                                | -0.667 | -0.392 | 0.005  | -0.536 | -1.349 | 0.102 | 0.34  | 0.437 | 0.144 | 0     |
| DB11294 | Coccidioides immitis spherule                                                                              | -0.666 | -0.553 | -1.398 | -0.014 | -0.573 | 0.138 | 0.27  | 0.024 | 0.368 | 0.221 |
| DB00024 | Thyrotropin alfa                                                                                           | -0.665 | -0.622 | 0.276  | -0.46  | -0.859 | 0.135 | 0.26  | 0.62  | 0.184 | 0.071 |
| DB00557 | Hydroxyzine                                                                                                | -0.665 | -0.528 | -0.305 | -0.765 | -0.994 | 0.175 | 0.371 | 0.36  | 0.063 | 0.021 |
| DB02726 | 2-Phosphoglycolic Acid                                                                                     | -0.664 | -0.812 | 0.093  | -0.2   | -0.551 | 0.227 | 0.176 | 0.233 | 0.327 | 0.224 |
| DB04957 | Azimilide                                                                                                  | -0.663 | -0.676 | 0.646  | -0.278 | -0.763 | 0.113 | 0.133 | 0.726 | 0.205 | 0.088 |
| DB04200 | Matairesinol                                                                                               | -0.661 | -0.562 | -0.15  | -0.14  | -1.086 | 0.072 | 0.198 | 0.334 | 0.287 | 0.009 |
| DB01108 | Trilostane                                                                                                 | -0.66  | 0.523  | -0.281 | -2.264 | -0.982 | 0.159 | 0.677 | 0.287 | 0.012 | 0.096 |
| DB06774 | Capsaicin                                                                                                  | -0.66  | -1.071 | 0.22   | -0.906 | -0.177 | 0.219 | 0.108 | 0.411 | 0.126 | 0.338 |
| DB07677 | 2-methyl-3,5,7,8-tetrahydro-4H-thiopyrano[4,3-d]pyrimidin-4-one                                            | -0.66  | 0.221  | -1.931 | -2.051 | 0.566  | 0.185 | 0.604 | 0.01  | 0.011 | 0.698 |
| DB08058 | 4-[3-(1,4-diazepan-1-ylcarbonyl)-4-fluorobenzyl]phthalazin-1(2H)-one                                       | -0.66  | 0.221  | -1.931 | -2.051 | 0.566  | 0.185 | 0.604 | 0.01  | 0.011 | 0.698 |
| DB03731 | S-2-(Boronoethyl)-L-Cysteine                                                                               | -0.659 | -0.574 | 0.254  | -1.333 | -1.218 | 0.145 | 0.229 | 0.59  | 0.007 | 0.007 |
| DB03758 | Radicicol                                                                                                  | -0.659 | -0.875 | -0.783 | 0.247  | -1.017 | 0.157 | 0.108 | 0.112 | 0.525 | 0.116 |
| DB08752 | N-[(1S)-2-[(4-cyano-1-methylpiperidin-4-yl)amino]-1-(cyclohexylmethyl)-2-oxoethyl]morpholine-4-carboxamide | -0.659 | -0.662 | 0.584  | -0.342 | -0.629 | 0.108 | 0.144 | 0.697 | 0.191 | 0.175 |

|         |                                                                                   |        |        |        |        |        |       |       |       |       |       |
|---------|-----------------------------------------------------------------------------------|--------|--------|--------|--------|--------|-------|-------|-------|-------|-------|
| DB00807 | Proparacaine                                                                      | -0.657 | -0.382 | 0.424  | -0.662 | -1.084 | 0.106 | 0.376 | 0.674 | 0.09  | 0.005 |
| DB09292 | Sacubitril                                                                        | -0.657 | -0.691 | -2.082 | 0.283  | -0.324 | 0.096 | 0.12  | 0.003 | 0.514 | 0.364 |
| DB06439 | Tyloxapol                                                                         | -0.656 | -0.588 | 0.156  | -0.702 | -0.829 | 0.155 | 0.283 | 0.598 | 0.08  | 0.064 |
| DB07691 | 2-([3-(3,4-dihydroisoquinolin-2(1H)-ylsulfonyl)phenyl]carbonyl)amino)benzoic acid | -0.656 | -0.104 | 1.059  | 1.146  | -2.158 | 0.212 | 0.423 | 0.768 | 0.708 | 0.004 |
| DB00741 | Hydrocortisone                                                                    | -0.652 | -0.086 | -0.812 | -1.34  | -1.101 | 0.14  | 0.367 | 0.158 | 0.06  | 0.077 |
| DB00625 | Efavirenz                                                                         | -0.65  | -0.511 | 0.398  | -0.428 | -1.087 | 0.122 | 0.29  | 0.669 | 0.185 | 0.002 |
| DB01181 | Ifosfamide                                                                        | -0.65  | -0.511 | 0.398  | -0.428 | -1.087 | 0.122 | 0.29  | 0.669 | 0.185 | 0.002 |
| DB01220 | Rifaximin                                                                         | -0.65  | -0.511 | 0.398  | -0.428 | -1.087 | 0.122 | 0.29  | 0.669 | 0.185 | 0.002 |
| DB01272 | Alglucosidase alfa                                                                | -0.65  | -0.527 | 0.138  | -0.672 | -0.94  | 0.187 | 0.376 | 0.606 | 0.093 | 0.022 |
| DB08807 | Bopindolol                                                                        | -0.65  | -0.31  | -2.416 | 0.305  | -1.731 | 0.216 | 0.328 | 0     | 0.507 | 0.026 |
| DB08864 | Rilpivirine                                                                       | -0.65  | -0.511 | 0.398  | -0.428 | -1.087 | 0.122 | 0.29  | 0.669 | 0.185 | 0.002 |
| DB00473 | Hexylcaine                                                                        | -0.649 | -0.51  | 0.496  | -0.69  | -0.984 | 0.185 | 0.346 | 0.695 | 0.121 | 0.034 |
| DB08871 | Eribulin                                                                          | -0.649 | -0.151 | 0.02   | -0.94  | -0.29  | 0.199 | 0.4   | 0.155 | 0.133 | 0.316 |
| DB06725 | Lornoxicam                                                                        | -0.648 | -0.367 | 1.524  | -1.327 | -1.263 | 0.109 | 0.31  | 0.883 | 0.035 | 0.029 |
| DB01929 | 5-Chloryl-2,4,6-Quinazolinetriamine                                               | -0.647 | -0.409 | -0.062 | 0.098  | -1.18  | 0.103 | 0.316 | 0.4   | 0.53  | 0.019 |
| DB01958 | 5-[4-Tert-Butylphenylsulfanyl]-2,4-Quinazolinodiamine                             | -0.647 | -0.409 | -0.062 | 0.098  | -1.18  | 0.103 | 0.316 | 0.4   | 0.53  | 0.019 |
| DB02001 | 5-(4-Morpholin-4-Yl-Phenylsulfanyl)-2,4-Quinazolinodiamine                        | -0.647 | -0.409 | -0.062 | 0.098  | -1.18  | 0.103 | 0.316 | 0.4   | 0.53  | 0.019 |
| DB02402 | 5-(4-Methoxyphenoxy)-2,4-Quinazolinodiamine                                       | -0.647 | -0.409 | -0.062 | 0.098  | -1.18  | 0.103 | 0.316 | 0.4   | 0.53  | 0.019 |
| DB04163 | 5-Phenylsulfanyl-2,4-Quinazolinodiamine                                           | -0.647 | -0.409 | -0.062 | 0.098  | -1.18  | 0.103 | 0.316 | 0.4   | 0.53  | 0.019 |
| DB07862 | 7-(1-ETHYL-PROPYL)-7H-PYRROLO-[3,2-F]QUINAZOLINE-1,3-DIAMINE                      | -0.647 | -0.409 | -0.062 | 0.098  | -1.18  | 0.103 | 0.316 | 0.4   | 0.53  | 0.019 |
| DB06726 | Bufuralol                                                                         | -0.646 | -0.13  | -1.896 | 0.362  | -1.174 | 0.223 | 0.396 | 0.015 | 0.516 | 0.076 |
| DB00004 | Denileukin diftitox                                                               | -0.643 | -0.26  | 0.405  | 0.442  | -1.838 | 0.207 | 0.339 | 0.54  | 0.397 | 0.01  |
| DB00041 | Aldesleukin                                                                       | -0.643 | -0.26  | 0.405  | 0.442  | -1.838 | 0.207 | 0.339 | 0.54  | 0.397 | 0.01  |
| DB00537 | Ciprofloxacin                                                                     | -0.643 | -0.452 | 0.67   | -0.957 | 0.042  | 0.19  | 0.279 | 0.621 | 0.11  | 0.446 |
| DB01208 | Sparfloxacin                                                                      | -0.643 | -0.452 | 0.67   | -0.957 | 0.042  | 0.19  | 0.279 | 0.621 | 0.11  | 0.446 |
| DB04608 | 9-HYDROXY-4-PHENYL-6H-PYRROLO[3,4-C]CARBAZOLE-1,3-DIONE                           | -0.643 | -0.659 | 0.392  | -0.352 | -0.782 | 0.215 | 0.193 | 0.278 | 0.282 | 0.16  |
| DB08569 | 3-PYRIDIN-4-YL-2,4-DIHYDRO-INDENO[1,2-C.]PYRAZOLE                                 | -0.642 | -1.198 | -0.386 | -0.156 | -0.362 | 0.149 | 0.075 | 0.189 | 0.326 | 0.22  |
| DB02597 | [2(R,S)-2-Sulfanylheptanoyl]-Phe-Ala                                              | -0.639 | -0.589 | -2.259 | 1.044  | 0.045  | 0.122 | 0.188 | 0.003 | 0.827 | 0.573 |
| DB03401 | 1D-myo-inositol 1,4,5-trisphosphate                                               | -0.638 | -0.493 | 0.397  | -0.459 | -0.942 | 0.13  | 0.298 | 0.653 | 0.163 | 0.035 |
| DB03227 | Nicotinamide Mononucleotide                                                       | -0.637 | -0.598 | 0.855  | -1.248 | -0.716 | 0.097 | 0.176 | 0.752 | 0.03  | 0.104 |
| DB07795 | Fisetin                                                                           | -0.637 | -0.264 | -0.377 | -0.755 | -0.009 | 0.156 | 0.295 | 0.257 | 0.165 | 0.406 |
| DB08883 | Perampanel                                                                        | -0.637 | -0.506 | 0.079  | -0.677 | -0.821 | 0.29  | 0.463 | 0.554 | 0.106 | 0.081 |
| DB00866 | Alprenolol                                                                        | -0.635 | 0.237  | -2.127 | -1.217 | -1.667 | 0.144 | 0.532 | 0.011 | 0.077 | 0.033 |
| DB05219 | Crisaborole                                                                       | -0.635 | -0.328 | 1.348  | -0.862 | -0.411 | 0.225 | 0.316 | 0.847 | 0.095 | 0.261 |
| DB09227 | Barnidipine                                                                       | -0.634 | -0.441 | 0.017  | -0.302 | -0.805 | 0.123 | 0.275 | 0.412 | 0.196 | 0.093 |
| DB01442 | MMDA                                                                              | -0.633 | -0.415 | 0.074  | -0.544 | -1.41  | 0.151 | 0.329 | 0.505 | 0.12  | 0     |
| DB08040 | N-[(2R)-2-benzyl-4-(hydroxyamino)-4-oxobutanoyl]-L-alanine                        | -0.633 | -0.1   | -2.203 | -0.061 | 0.517  | 0.217 | 0.412 | 0.004 | 0.31  | 0.62  |
| DB06228 | Rivaroxaban                                                                       | -0.63  | -0.463 | 0.743  | -0.331 | -0.774 | 0.109 | 0.254 | 0.768 | 0.177 | 0.107 |
| DB03349 | 8-Bromo-Adenosine-5'-Monophosphate                                                | -0.628 | -0.615 | 0.736  | -0.296 | -0.781 | 0.106 | 0.162 | 0.725 | 0.193 | 0.09  |
| DB03975 | Mercuribenzoic Acid                                                               | -0.628 | -0.284 | 0.829  | -1.276 | -1.367 | 0.128 | 0.403 | 0.766 | 0.024 | 0.01  |
| DB03314 | 5-fluorotryptophan                                                                | -0.626 | -0.457 | -0.011 | -0.062 | -0.841 | 0.12  | 0.254 | 0.404 | 0.286 | 0.058 |
| DB03886 | Biopterin                                                                         | -0.626 | -0.442 | 0.455  | -0.445 | -1.191 | 0.136 | 0.317 | 0.697 | 0.157 | 0.011 |

|         |                                                                                                                                                         |        |        |        |        |        |       |       |       |       |       |
|---------|---------------------------------------------------------------------------------------------------------------------------------------------------------|--------|--------|--------|--------|--------|-------|-------|-------|-------|-------|
| DB08810 | Cinitapride                                                                                                                                             | -0.626 | -0.552 | -0.169 | -0.662 | -1.203 | 0.164 | 0.275 | 0.394 | 0.098 | 0.003 |
| DB00175 | Pravastatin                                                                                                                                             | -0.625 | -0.579 | 0.421  | -0.368 | -0.784 | 0.15  | 0.196 | 0.667 | 0.179 | 0.071 |
| DB03785 | (3r,5r)-7-((1r,2r,6s,8r,8as)-2,6-Dimethyl-8-<br>{[(2r)-2-Methylbutanoyl]Oxy}-1,2,6,7,8,8a-<br>Hexahydronaphthalen-1-Yl)-3,5-<br>Dihydroxyheptanoic Acid | -0.625 | -0.579 | 0.421  | -0.368 | -0.784 | 0.15  | 0.196 | 0.667 | 0.179 | 0.071 |
| DB01106 | Levocabastine                                                                                                                                           | -0.624 | -0.526 | -0.168 | -0.292 | -0.623 | 0.17  | 0.279 | 0.387 | 0.316 | 0.18  |
| DB05381 | Histamine                                                                                                                                               | -0.623 | 0.364  | 1.075  | -0.388 | -0.641 | 0.222 | 0.599 | 0.781 | 0.274 | 0.203 |
| DB07283 | 9-benzyl-2,3,4,9-tetrahydro-1H-carbazole-<br>8-carboxylic acid                                                                                          | -0.623 | -0.542 | 0.912  | -0.564 | -0.909 | 0.178 | 0.282 | 0.82  | 0.125 | 0.048 |
| DB01412 | Theobromine                                                                                                                                             | -0.622 | -0.46  | -0.208 | -0.281 | -0.817 | 0.134 | 0.258 | 0.317 | 0.189 | 0.092 |
| DB02109 | Hadacidin                                                                                                                                               | -0.622 | -0.461 | 0.424  | -0.414 | -0.972 | 0.113 | 0.283 | 0.608 | 0.169 | 0.019 |
| DB03510 | 6-O-Phosphoryl Inosine Monophosphate                                                                                                                    | -0.622 | -0.461 | 0.424  | -0.414 | -0.972 | 0.113 | 0.283 | 0.608 | 0.169 | 0.019 |
| DB07247 | [2'-HYDROXY-3'-(1H-PYRROLO[3,2-<br>C]PYRIDIN-2-YL)-BIPHENYL-3-YLMETHYL]-<br>UREA                                                                        | -0.622 | -0.502 | 0.403  | -0.433 | -1.01  | 0.103 | 0.277 | 0.658 | 0.152 | 0.027 |
| DB00937 | Diethylpropion                                                                                                                                          | -0.621 | -0.411 | 0.015  | -0.687 | -0.849 | 0.28  | 0.467 | 0.508 | 0.085 | 0.058 |
| DB05578 | Ramucirumab                                                                                                                                             | -0.621 | -0.502 | 0.711  | -1     | -0.76  | 0.116 | 0.275 | 0.75  | 0.042 | 0.085 |
| DB00616 | Candoxatril                                                                                                                                             | -0.618 | -0.483 | -2.221 | 0.664  | 0.004  | 0.173 | 0.255 | 0.004 | 0.558 | 0.498 |
| DB00886 | Omapatrilat                                                                                                                                             | -0.618 | -0.483 | -2.221 | 0.664  | 0.004  | 0.173 | 0.255 | 0.004 | 0.558 | 0.498 |
| DB03633 | Lpc-Ether                                                                                                                                               | -0.618 | -0.537 | 0.205  | -1.278 | -1.173 | 0.16  | 0.292 | 0.576 | 0.009 | 0.003 |
| DB08626 | Thiorphan                                                                                                                                               | -0.618 | -0.483 | -2.221 | 0.664  | 0.004  | 0.173 | 0.255 | 0.004 | 0.558 | 0.498 |
| DB00262 | Carmustine                                                                                                                                              | -0.617 | -0.479 | 0.511  | -0.43  | -1.223 | 0.144 | 0.296 | 0.688 | 0.157 | 0.006 |
| DB02267 | Argininosuccinate                                                                                                                                       | -0.617 | -0.389 | 0.205  | 0.048  | -1.136 | 0.154 | 0.314 | 0.454 | 0.306 | 0.031 |
| DB04880 | Enoximone                                                                                                                                               | -0.617 | -0.088 | -0.239 | -0.451 | -1.323 | 0.16  | 0.661 | 0.334 | 0.159 | 0.002 |
| DB07405 | 1-(6-CYANO-3-PYRIDYLCARBONYL)-5',8'-<br>DIFLUOROSPIRO[PIPERIDINE-4,2'(1'H)-<br>QUINAZOLINE]-4'-AMINE                                                    | -0.617 | 0.43   | 0.911  | -0.411 | -2.435 | 0.231 | 0.622 | 0.718 | 0.252 | 0.002 |
| DB09090 | Pinaverium                                                                                                                                              | -0.617 | -0.408 | 1.002  | -0.451 | -0.999 | 0.16  | 0.363 | 0.82  | 0.159 | 0.03  |
| DB00065 | Infliximab                                                                                                                                              | -0.616 | -0.581 | -2.189 | -0.598 | -0.685 | 0.109 | 0.185 | 0.004 | 0.164 | 0.132 |
| DB06674 | Golimumab                                                                                                                                               | -0.616 | -0.581 | -2.189 | -0.598 | -0.685 | 0.109 | 0.185 | 0.004 | 0.164 | 0.132 |
| DB08904 | Certolizumab pegol                                                                                                                                      | -0.616 | -0.581 | -2.189 | -0.598 | -0.685 | 0.109 | 0.185 | 0.004 | 0.164 | 0.132 |
| DB02918 | Zardaverine                                                                                                                                             | -0.614 | 0.064  | 1.171  | -1.113 | -1.382 | 0.123 | 0.578 | 0.821 | 0.063 | 0.016 |
| DB00521 | Carteolol                                                                                                                                               | -0.613 | 0.02   | -1.826 | 0.286  | -1.348 | 0.231 | 0.477 | 0.012 | 0.498 | 0.038 |
| DB00789 | Gadopentetic acid                                                                                                                                       | -0.613 | -0.568 | 0.112  | -0.577 | -0.843 | 0.226 | 0.342 | 0.689 | 0.145 | 0.122 |
| DB01193 | Acebutolol                                                                                                                                              | -0.613 | 0.02   | -1.826 | 0.286  | -1.348 | 0.231 | 0.477 | 0.012 | 0.498 | 0.038 |
| DB01214 | Metipranolol                                                                                                                                            | -0.613 | 0.02   | -1.826 | 0.286  | -1.348 | 0.231 | 0.477 | 0.012 | 0.498 | 0.038 |
| DB01291 | Pirbuterol                                                                                                                                              | -0.613 | 0.02   | -1.826 | 0.286  | -1.348 | 0.231 | 0.477 | 0.012 | 0.498 | 0.038 |
| DB01297 | Practolol                                                                                                                                               | -0.613 | 0.02   | -1.826 | 0.286  | -1.348 | 0.231 | 0.477 | 0.012 | 0.498 | 0.038 |
| DB02640 | Fumagillin                                                                                                                                              | -0.613 | -0.525 | 0.562  | -0.35  | -0.869 | 0.108 | 0.232 | 0.722 | 0.227 | 0.034 |
| DB04846 | Celiprolol                                                                                                                                              | -0.613 | 0.02   | -1.826 | 0.286  | -1.348 | 0.231 | 0.477 | 0.012 | 0.498 | 0.038 |
| DB08952 | Indenolol                                                                                                                                               | -0.613 | 0.02   | -1.826 | 0.286  | -1.348 | 0.231 | 0.477 | 0.012 | 0.498 | 0.038 |
| DB09351 | Levobetaxolol                                                                                                                                           | -0.613 | 0.02   | -1.826 | 0.286  | -1.348 | 0.231 | 0.477 | 0.012 | 0.498 | 0.038 |
| DB00020 | Sargramostim                                                                                                                                            | -0.611 | -0.058 | -0.202 | 1.229  | -1.722 | 0.235 | 0.416 | 0.135 | 0.755 | 0.029 |
| DB01234 | Dexamethasone                                                                                                                                           | -0.608 | 0.021  | -0.857 | -0.612 | -2.046 | 0.162 | 0.456 | 0.122 | 0.215 | 0.019 |
| DB03310 | Glutathione disulfide                                                                                                                                   | -0.607 | -0.473 | 0.254  | -0.538 | -1.059 | 0.202 | 0.319 | 0.59  | 0.14  | 0.02  |
| DB04395 | Phosphoaminophosphonic Acid-<br>Adenylate Ester                                                                                                         | -0.606 | -0.797 | -1.073 | 0.381  | -0.558 | 0.146 | 0.151 | 0.109 | 0.584 | 0.226 |
| DB04674 | 2-HYDROXY-3,5-DIODOBENZOIC ACID                                                                                                                         | -0.606 | -0.479 | 0.306  | -0.524 | -0.895 | 0.161 | 0.316 | 0.628 | 0.131 | 0.046 |
| DB01836 | [4-(6-Chloro-Naphthalene-2-Sulfonyl)-<br>Piperazin-1-Yl]-(3,4,5,6-Tetrahydro-2h-<br>[1,4']Bipyridinyl-4-Yl)-Methanone                                   | -0.601 | -0.605 | 0.749  | -0.295 | -0.772 | 0.121 | 0.173 | 0.742 | 0.198 | 0.105 |
| DB02068 | Delta-Amino Valeric Acid                                                                                                                                | -0.601 | -0.509 | -0.033 | -0.67  | -0.85  | 0.262 | 0.383 | 0.492 | 0.096 | 0.054 |

|         |                                                                                                              |        |        |        |        |        |       |       |       |       |       |
|---------|--------------------------------------------------------------------------------------------------------------|--------|--------|--------|--------|--------|-------|-------|-------|-------|-------|
| DB02269 | [4-({[5-Benzyloxy-1-(3-Carbamimidoyl-Benzyl)-1h-Indole-2-Carbonyl]-Amino)-Methyl]-Phenyl]-Trimethyl-Ammonium | -0.601 | -0.605 | 0.749  | -0.295 | -0.772 | 0.121 | 0.173 | 0.742 | 0.198 | 0.105 |
| DB02483 | Etheno-Nad                                                                                                   | -0.601 | -0.573 | 0.883  | -0.821 | -1.342 | 0.156 | 0.206 | 0.749 | 0.112 | 0.01  |
| DB08228 | 5,8-dimethoxy-1,4-dimethylquinolin-2(1H)-one                                                                 | -0.599 | -0.452 | 0.216  | -0.602 | -0.891 | 0.174 | 0.381 | 0.632 | 0.085 | 0.043 |
| DB08744 | 6-methoxy-9-methyl[1,3]dioxolo[4,5-h]quinolin-8(9H)-one                                                      | -0.599 | -0.452 | 0.216  | -0.602 | -0.891 | 0.174 | 0.381 | 0.632 | 0.085 | 0.043 |
| DB00671 | Cefixime                                                                                                     | -0.598 | 0.143  | 2.04   | -1.902 | -1.17  | 0.145 | 0.479 | 0.994 | 0.024 | 0.072 |
| DB00882 | Clomifene                                                                                                    | -0.598 | 0.239  | 0.378  | -0.387 | -1.083 | 0.167 | 0.534 | 0.571 | 0.283 | 0.095 |
| DB07302 | (9S,10E,12Z)-9-hydroxyoctadeca-10,12-dienoic acid                                                            | -0.598 | -0.053 | 0.216  | 0.672  | -1.596 | 0.219 | 0.469 | 0.414 | 0.587 | 0.007 |
| DB08931 | Riociguat                                                                                                    | -0.598 | -0.425 | -0.057 | -0.62  | -0.921 | 0.198 | 0.381 | 0.43  | 0.107 | 0.027 |
| DB01270 | Ranibizumab                                                                                                  | -0.597 | -0.523 | -0.113 | -0.433 | -0.631 | 0.204 | 0.314 | 0.399 | 0.2   | 0.165 |
| DB09083 | Ivabradine                                                                                                   | -0.596 | -0.371 | 0.053  | -0.691 | -0.941 | 0.209 | 0.462 | 0.54  | 0.095 | 0.031 |
| DB00435 | Nitric Oxide                                                                                                 | -0.595 | -0.498 | -0.208 | -0.73  | -0.833 | 0.254 | 0.385 | 0.394 | 0.076 | 0.061 |
| DB06987 | (R)-Atenolol                                                                                                 | -0.595 | -0.407 | 0.667  | -0.915 | -0.555 | 0.147 | 0.368 | 0.725 | 0.073 | 0.228 |
| DB07642 | 5-([1-(2-fluorobenzyl)piperidin-4-yl]methoxy)quinazoline-2,4-diamine                                         | -0.595 | -0.487 | 0.351  | -0.37  | -0.923 | 0.134 | 0.266 | 0.627 | 0.178 | 0.024 |
| DB09158 | Trypan blue free acid                                                                                        | -0.595 | -0.353 | -0.439 | -0.516 | -0.839 | 0.137 | 0.385 | 0.08  | 0.195 | 0.064 |
| DB01143 | Amifostine                                                                                                   | -0.593 | -0.404 | 0.942  | -0.259 | -0.766 | 0.156 | 0.296 | 0.793 | 0.2   | 0.102 |
| DB02052 | Indirubin-3'-Monoxime                                                                                        | -0.593 | -0.168 | -0.235 | -1.141 | -0.588 | 0.164 | 0.316 | 0.32  | 0.078 | 0.173 |
| DB04444 | Tetrafluoroaluminate Ion                                                                                     | -0.593 | -0.477 | 0.086  | 0.496  | -0.421 | 0.25  | 0.262 | 0.374 | 0.43  | 0.258 |
| DB00452 | Framycetin                                                                                                   | -0.592 | -0.412 | -1.351 | -0.918 | 0.07   | 0.203 | 0.289 | 0.058 | 0.13  | 0.453 |
| DB02638 | Terlipressin                                                                                                 | -0.592 | -0.483 | -0.664 | -0.639 | -0.766 | 0.159 | 0.29  | 0.132 | 0.108 | 0.081 |
| DB02018 | Amido Phenyl Pyruvic Acid                                                                                    | -0.59  | -0.9   | 0.214  | 0.294  | 0.024  | 0.174 | 0.093 | 0.483 | 0.377 | 0.451 |
| DB00195 | Betaxolol                                                                                                    | -0.588 | 0.081  | -1.915 | 0.226  | -1.366 | 0.233 | 0.516 | 0.012 | 0.47  | 0.05  |
| DB00612 | Bisoprolol                                                                                                   | -0.588 | 0.081  | -1.915 | 0.226  | -1.366 | 0.233 | 0.516 | 0.012 | 0.47  | 0.05  |
| DB01102 | Arbutamine                                                                                                   | -0.588 | 0.081  | -1.915 | 0.226  | -1.366 | 0.233 | 0.516 | 0.012 | 0.47  | 0.05  |
| DB01203 | Nadolol                                                                                                      | -0.588 | 0.081  | -1.915 | 0.226  | -1.366 | 0.233 | 0.516 | 0.012 | 0.47  | 0.05  |
| DB01218 | Halofantrine                                                                                                 | -0.588 | -0.734 | -1.121 | -0.926 | -0.246 | 0.162 | 0.164 | 0.065 | 0.11  | 0.271 |
| DB01274 | Arformoterol                                                                                                 | -0.588 | 0.081  | -1.915 | 0.226  | -1.366 | 0.233 | 0.516 | 0.012 | 0.47  | 0.05  |
| DB01955 | 1,4-Butanediol                                                                                               | -0.588 | -0.608 | 1.162  | -0.133 | -0.565 | 0.14  | 0.168 | 0.849 | 0.358 | 0.201 |
| DB08808 | Bupranolol                                                                                                   | -0.588 | 0.081  | -1.915 | 0.226  | -1.366 | 0.233 | 0.516 | 0.012 | 0.47  | 0.05  |
| DB08893 | Mirabegron                                                                                                   | -0.588 | 0.081  | -1.915 | 0.226  | -1.366 | 0.233 | 0.516 | 0.012 | 0.47  | 0.05  |
| DB09080 | Olodaterol                                                                                                   | -0.588 | 0.081  | -1.915 | 0.226  | -1.366 | 0.233 | 0.516 | 0.012 | 0.47  | 0.05  |
| DB09082 | Vilanterol                                                                                                   | -0.588 | 0.081  | -1.915 | 0.226  | -1.366 | 0.233 | 0.516 | 0.012 | 0.47  | 0.05  |
| DB00070 | Hyaluronidase (ovine)                                                                                        | -0.587 | -0.314 | 0.296  | 0.283  | -1.315 | 0.201 | 0.427 | 0.542 | 0.514 | 0     |
| DB02333 | Deoxyuridine-5'-Triphosphate                                                                                 | -0.587 | -0.36  | 0.344  | -1.537 | -1.284 | 0.155 | 0.311 | 0.52  | 0.042 | 0.027 |
| DB06205 | Vorhyaluronidase alfa                                                                                        | -0.587 | -0.314 | 0.296  | 0.283  | -1.315 | 0.201 | 0.427 | 0.542 | 0.514 | 0     |
| DB04566 | Inosinic Acid                                                                                                | -0.583 | -0.476 | -1.395 | -0.157 | 0.348  | 0.236 | 0.242 | 0.059 | 0.283 | 0.531 |
| DB00138 | Cystine                                                                                                      | -0.582 | -0.32  | 0.26   | -0.405 | -0.869 | 0.236 | 0.491 | 0.613 | 0.266 | 0.057 |
| DB00207 | Azithromycin                                                                                                 | -0.582 | -0.223 | 1.112  | 0.009  | 0.246  | 0.251 | 0.341 | 0.768 | 0.399 | 0.5   |
| DB02795 | P-Anisic Acid                                                                                                | -0.582 | -0.367 | 0.769  | -1.036 | -0.942 | 0.196 | 0.412 | 0.759 | 0.065 | 0.04  |
| DB03661 | Cysteinesulfonic Acid                                                                                        | -0.582 | -0.806 | -0.134 | -0.199 | 0.608  | 0.238 | 0.162 | 0.173 | 0.31  | 0.645 |
| DB07248 | 7-PYRIDIN-2-YL-N-(3,4,5-TRIMETHOXYPHENYL)-7H-PYRROLO[2,3-D]PYRIMIDIN-2-AMINE                                 | -0.582 | 0.418  | -1.654 | -0.822 | -0.362 | 0.231 | 0.612 | 0.026 | 0.143 | 0.29  |
| DB01246 | Alimemazine                                                                                                  | -0.581 | -0.416 | 0.355  | -0.396 | -0.826 | 0.217 | 0.349 | 0.644 | 0.187 | 0.07  |
| DB04456 | Arsenous acid                                                                                                | -0.581 | -0.515 | 1.948  | 0.63   | -1.131 | 0.155 | 0.218 | 0.936 | 0.691 | 0.036 |
| DB00135 | Tyrosine                                                                                                     | -0.58  | -0.421 | 0.269  | -0.572 | -1.545 | 0.251 | 0.289 | 0.432 | 0.156 | 0.036 |
| DB06267 | Udenafil                                                                                                     | -0.579 | -0.467 | -0.363 | -0.626 | -0.76  | 0.212 | 0.384 | 0.268 | 0.104 | 0.112 |
| DB09488 | Acrivastine                                                                                                  | -0.579 | -0.467 | -0.363 | -0.626 | -0.76  | 0.212 | 0.384 | 0.268 | 0.104 | 0.112 |
| DB01791 | Piclamilast                                                                                                  | -0.578 | -0.313 | 0.479  | -0.956 | -0.684 | 0.217 | 0.318 | 0.553 | 0.093 | 0.162 |
| DB00274 | Cefmetazole                                                                                                  | -0.577 | -0.47  | 0.276  | -0.46  | -0.859 | 0.261 | 0.421 | 0.62  | 0.184 | 0.071 |
| DB00436 | Bendroflumethiazide                                                                                          | -0.576 | 0.105  | 1.813  | -0.672 | -1.692 | 0.24  | 0.51  | 0.934 | 0.18  | 0.02  |
| DB03884 | Phenylpyruvic acid                                                                                           | -0.575 | -0.414 | 0.098  | -0.647 | -0.959 | 0.231 | 0.422 | 0.545 | 0.106 | 0.038 |

|         |                                                                                                                     |        |        |        |        |        |       |       |       |       |       |
|---------|---------------------------------------------------------------------------------------------------------------------|--------|--------|--------|--------|--------|-------|-------|-------|-------|-------|
| DB07352 | Apigenin                                                                                                            | -0.575 | -0.911 | -2.495 | -1.556 | 0.638  | 0.154 | 0.111 | 0.002 | 0.043 | 0.716 |
| DB04310 | 2-[(Formyl-Hydroxy-Amino)-Methyl]-Heptanoic Acid [1-(2-Hydroxymethyl-Pyrrolidine-1-Carbonyl)-2-Methyl-Propyl]-Amide | -0.574 | -0.356 | -1.55  | 0.167  | 1.702  | 0.242 | 0.315 | 0.025 | 0.467 | 0.935 |
| DB02375 | Myricetin                                                                                                           | -0.573 | -0.947 | -1.01  | -0.188 | 0.091  | 0.227 | 0.114 | 0.118 | 0.407 | 0.493 |
| DB09231 | Benidipine                                                                                                          | -0.57  | -0.39  | 0.836  | -0.014 | -0.646 | 0.189 | 0.291 | 0.749 | 0.255 | 0.167 |
| DB08221 | N-{4-METHYL-3-[(3-PYRIMIDIN-4-YLPYRIDIN-2-YL)AMINO]PHENYL}-3-(TRIFLUOROMETHYL)BENZAMIDE                             | -0.569 | 0.043  | 0.459  | -0.798 | -1.136 | 0.175 | 0.537 | 0.576 | 0.102 | 0.054 |
| DB00439 | Cerivastatin                                                                                                        | -0.568 | -0.357 | 1.11   | 0.119  | -1.104 | 0.161 | 0.323 | 0.818 | 0.302 | 0.042 |
| DB02142 | Pyridoxamine-5'-Phosphate                                                                                           | -0.568 | -0.282 | 0.65   | -0.127 | -1.211 | 0.177 | 0.382 | 0.692 | 0.239 | 0.029 |
| DB03660 | 4-Iodo-L-phenylalanine                                                                                              | -0.568 | -0.246 | 0.066  | -0.161 | -0.981 | 0.171 | 0.422 | 0.43  | 0.239 | 0.049 |
| DB07276 | 5-CYANO-N-(2,5-DIMETHOXYBENZYL)-6-ETHOXYPYRIDINE-2-CARBOXAMIDE                                                      | -0.568 | -0.818 | 1.203  | -0.16  | 0.105  | 0.234 | 0.139 | 0.83  | 0.323 | 0.442 |
| DB02459 | 4-Guanidinobenzoic Acid                                                                                             | -0.567 | 0.046  | 1.598  | -2.26  | -1.455 | 0.251 | 0.474 | 0.883 | 0.014 | 0.046 |
| DB13159 |                                                                                                                     | -0.566 | -0.427 | 0.713  | -1.042 | -0.98  | 0.229 | 0.359 | 0.748 | 0.042 | 0.036 |
| DB00946 | Phenprocoumon                                                                                                       | -0.565 | -0.022 | -2.148 | 0.013  | -0.692 | 0.309 | 0.727 | 0     | 0.369 | 0.139 |
| DB01153 | Sertaconazole                                                                                                       | -0.565 | -0.527 | -1.263 | -0.949 | -0.25  | 0.187 | 0.202 | 0.046 | 0.099 | 0.254 |
| DB01418 | Acenocoumarol                                                                                                       | -0.565 | -0.022 | -2.148 | 0.013  | -0.692 | 0.309 | 0.727 | 0     | 0.369 | 0.139 |
| DB04881 | Elacridar                                                                                                           | -0.564 | -0.421 | -0.329 | -0.559 | -0.714 | 0.245 | 0.41  | 0.287 | 0.124 | 0.125 |
| DB03083 | IC261                                                                                                               | -0.563 | 0.449  | 0.484  | -2.29  | -1.345 | 0.155 | 0.664 | 0.339 | 0.012 | 0.052 |
| DB08180 | 2-[METHYL-(5-GERANYL-4-METHYL-PENT-3-ENYL)-AMINO]-ETHYL-DIPHOSPHATE                                                 | -0.563 | -0.076 | 0.908  | -0.164 | -1.116 | 0.183 | 0.546 | 0.755 | 0.24  | 0.021 |
| DB01207 | Ridogrel                                                                                                            | -0.562 | -0.455 | 0.243  | -0.509 | -0.891 | 0.189 | 0.345 | 0.577 | 0.145 | 0.049 |
| DB00562 | Benzthiazide                                                                                                        | -0.561 | 0.185  | 1.95   | -1.227 | -1.598 | 0.255 | 0.516 | 0.936 | 0.085 | 0.039 |
| DB01282 | Carbetocin                                                                                                          | -0.561 | -0.41  | -0.541 | -0.522 | -0.699 | 0.206 | 0.333 | 0.177 | 0.125 | 0.109 |
| DB04387 | 1-Hydroxy-2-Amino-3-Cyclohexylpropane                                                                               | -0.56  | -0.449 | 0.868  | -0.526 | -0.704 | 0.213 | 0.317 | 0.815 | 0.125 | 0.104 |
| DB03052 | Dazoxiben                                                                                                           | -0.558 | -0.432 | -0.033 | -0.67  | -0.85  | 0.316 | 0.475 | 0.492 | 0.096 | 0.054 |
| DB08604 | Triclosan                                                                                                           | -0.558 | -0.45  | -0.9   | -0.187 | -0.622 | 0.187 | 0.233 | 0.132 | 0.333 | 0.192 |
| DB02515 | 3-Phosphoglycerol                                                                                                   | -0.556 | -0.357 | 0.128  | -0.021 | -0.782 | 0.151 | 0.319 | 0.454 | 0.285 | 0.1   |
| DB00620 | Triamcinolone                                                                                                       | -0.555 | 0.043  | -1.599 | -2.001 | -0.414 | 0.191 | 0.425 | 0.041 | 0.017 | 0.237 |
| DB00938 | Salmeterol                                                                                                          | -0.555 | 0.021  | -0.764 | 0.867  | -1.301 | 0.249 | 0.457 | 0.125 | 0.767 | 0.056 |
| DB04878 | Voglibose                                                                                                           | -0.555 | -0.295 | 0.218  | -0.664 | -1.029 | 0.247 | 0.516 | 0.578 | 0.111 | 0.021 |
| DB07853 | [4-({4-[(5-CYCLOPROPYL-1H-PYRAZOL-3-YL)AMINO]QUINAZOLIN-2-YL}IMINO)CYCLOHEXA-2,5-DIEN-1-YL)ACETONITRILE             | -0.555 | -0.345 | 1.388  | -1.228 | -0.766 | 0.189 | 0.374 | 0.879 | 0.038 | 0.088 |
| DB08278 | 1-(2-CYCLOPROPYLETHYL)-3-(1,1-DIOXIDO-2H-1,2,4-BENZOTHIADIAZIN-3-YL)-6-FLUORO-4-HYDROXYQUINOLIN-2(1H)-ONE           | -0.555 | -0.204 | 1.647  | -0.101 | -1.549 | 0.159 | 0.467 | 0.908 | 0.249 | 0.003 |
| DB03981 | 1,4-Dideoxy-5-Dehydro-O2-Sulfo-Glucuronic Acid                                                                      | -0.554 | -0.467 | 0.652  | -0.236 | -0.722 | 0.202 | 0.338 | 0.735 | 0.359 | 0.114 |
| DB04564 | Gluconolactone                                                                                                      | -0.553 | -0.164 | 0.461  | -0.455 | -1.214 | 0.216 | 0.636 | 0.682 | 0.167 | 0.001 |
| DB06720 | Velaglucerase alfa                                                                                                  | -0.553 | -0.164 | 0.461  | -0.455 | -1.214 | 0.216 | 0.636 | 0.682 | 0.167 | 0.001 |
| DB03602 | S-Benzyl-Glutathione                                                                                                | -0.538 | -0.352 | 0.338  | -0.465 | -0.871 | 0.206 | 0.408 | 0.639 | 0.148 | 0.042 |
| DB01812 | Adenosine-3'-5'-Diphosphate                                                                                         | -0.534 | 0.098  | 1.631  | -1.432 | -0.539 | 0.264 | 0.472 | 0.912 | 0.049 | 0.212 |
| DB00290 | Bleomycin                                                                                                           | -0.533 | -0.17  | 0.463  | -0.865 | -0.572 | 0.198 | 0.413 | 0.567 | 0.091 | 0.212 |
| DB04707 | Hydroxyfasudil                                                                                                      | -0.533 | -0.693 | 0.49   | -0.954 | -0.556 | 0.178 | 0.156 | 0.414 | 0.119 | 0.181 |
| DB00820 | Tadalafil                                                                                                           | -0.532 | -0.332 | -0.04  | -0.476 | -0.998 | 0.22  | 0.423 | 0.429 | 0.17  | 0.024 |
| DB02388 | Cyclohexyl-4-[5-(3,4-Dichlorophenyl)-2-Piperidin-4-Yl-3-Propyl-3h-Imidazol-4-Yl]-Pyrimidin-2-Yl)Amine               | -0.532 | -0.829 | 1.294  | -0.017 | 0.311  | 0.266 | 0.149 | 0.865 | 0.399 | 0.548 |



|         |                                                                                                |        |        |        |        |        |       |       |       |       |       |
|---------|------------------------------------------------------------------------------------------------|--------|--------|--------|--------|--------|-------|-------|-------|-------|-------|
| DB08021 | 5-bromo-N-(3-chloro-2-(4-(prop-2-ynyl)piperazin-1-yl)phenyl)furan-2-carboxamide                | -0.532 | -0.829 | 1.294  | -0.017 | 0.311  | 0.266 | 0.149 | 0.865 | 0.399 | 0.548 |
| DB08025 | N-{2'-[(4-FLUOROPHENYL)AMINO]-4,4'-BIPYRIDIN-2-YL}-4-METHOXYCYCLOHEXANECARBOXAMIDE             | -0.532 | -0.829 | 1.294  | -0.017 | 0.311  | 0.266 | 0.149 | 0.865 | 0.399 | 0.548 |
| DB00075 | Muromonab                                                                                      | -0.531 | 0.084  | 0.016  | -1.285 | 0.339  | 0.263 | 0.46  | 0.364 | 0.078 | 0.548 |
| DB00111 | Daclizumab                                                                                     | -0.531 | -0.742 | 0.062  | -0.066 | 0.298  | 0.258 | 0.185 | 0.349 | 0.389 | 0.511 |
| DB00469 | Tenoxicam                                                                                      | -0.531 | -0.259 | 1.311  | -1.303 | -0.972 | 0.202 | 0.442 | 0.885 | 0.011 | 0.031 |
| DB00814 | Meloxicam                                                                                      | -0.531 | -0.259 | 1.311  | -1.303 | -0.972 | 0.202 | 0.442 | 0.885 | 0.011 | 0.031 |
| DB00821 | Carprofen                                                                                      | -0.531 | -0.259 | 1.311  | -1.303 | -0.972 | 0.202 | 0.442 | 0.885 | 0.011 | 0.031 |
| DB00963 | Bromfenac                                                                                      | -0.531 | -0.259 | 1.311  | -1.303 | -0.972 | 0.202 | 0.442 | 0.885 | 0.011 | 0.031 |
| DB01283 | Lumiracoxib                                                                                    | -0.531 | -0.259 | 1.311  | -1.303 | -0.972 | 0.202 | 0.442 | 0.885 | 0.011 | 0.031 |
| DB01294 | Bismuth subsalicylate                                                                          | -0.531 | -0.259 | 1.311  | -1.303 | -0.972 | 0.202 | 0.442 | 0.885 | 0.011 | 0.031 |
| DB01399 | Salsalate                                                                                      | -0.531 | -0.259 | 1.311  | -1.303 | -0.972 | 0.202 | 0.442 | 0.885 | 0.011 | 0.031 |
| DB01401 | Choline magnesium trisalicylate                                                                | -0.531 | -0.259 | 1.311  | -1.303 | -0.972 | 0.202 | 0.442 | 0.885 | 0.011 | 0.031 |
| DB01419 | Antrafenine                                                                                    | -0.531 | -0.259 | 1.311  | -1.303 | -0.972 | 0.202 | 0.442 | 0.885 | 0.011 | 0.031 |
| DB01424 | Aminophenazone                                                                                 | -0.531 | -0.259 | 1.311  | -1.303 | -0.972 | 0.202 | 0.442 | 0.885 | 0.011 | 0.031 |
| DB01435 | Antipyrine                                                                                     | -0.531 | -0.259 | 1.311  | -1.303 | -0.972 | 0.202 | 0.442 | 0.885 | 0.011 | 0.031 |
| DB01600 | Tiaprofenic acid                                                                               | -0.531 | -0.259 | 1.311  | -1.303 | -0.972 | 0.202 | 0.442 | 0.885 | 0.011 | 0.031 |
| DB04920 | Clevidipine                                                                                    | -0.531 | -0.256 | 2.223  | -0.426 | -1.15  | 0.207 | 0.392 | 0.955 | 0.182 | 0.029 |
| DB05095 | Cimicoxib                                                                                      | -0.531 | -0.259 | 1.311  | -1.303 | -0.972 | 0.202 | 0.442 | 0.885 | 0.011 | 0.031 |
| DB06802 | Nepafenac                                                                                      | -0.531 | -0.259 | 1.311  | -1.303 | -0.972 | 0.202 | 0.442 | 0.885 | 0.011 | 0.031 |
| DB08942 | Isoxicam                                                                                       | -0.531 | -0.259 | 1.311  | -1.303 | -0.972 | 0.202 | 0.442 | 0.885 | 0.011 | 0.031 |
| DB08976 | Floctafenine                                                                                   | -0.531 | -0.259 | 1.311  | -1.303 | -0.972 | 0.202 | 0.442 | 0.885 | 0.011 | 0.031 |
| DB08981 | Fenbufen                                                                                       | -0.531 | -0.259 | 1.311  | -1.303 | -0.972 | 0.202 | 0.442 | 0.885 | 0.011 | 0.031 |
| DB09212 | Loxoprofen                                                                                     | -0.531 | -0.259 | 1.311  | -1.303 | -0.972 | 0.202 | 0.442 | 0.885 | 0.011 | 0.031 |
| DB09214 | Dexketoprofen                                                                                  | -0.531 | -0.259 | 1.311  | -1.303 | -0.972 | 0.202 | 0.442 | 0.885 | 0.011 | 0.031 |
| DB00731 | Nateglinide                                                                                    | -0.528 | 0.004  | 1.278  | 1.433  | -1.351 | 0.256 | 0.509 | 0.833 | 0.88  | 0.031 |
| DB01252 | Mitiglinide                                                                                    | -0.528 | 0.004  | 1.278  | 1.433  | -1.351 | 0.256 | 0.509 | 0.833 | 0.88  | 0.031 |
| DB00066 | Follitropin                                                                                    | -0.524 | -0.262 | -0.266 | -0.505 | -0.842 | 0.288 | 0.596 | 0.339 | 0.157 | 0.049 |
| DB00094 | Urofollitropin                                                                                 | -0.524 | -0.262 | -0.266 | -0.505 | -0.842 | 0.288 | 0.596 | 0.339 | 0.157 | 0.049 |
| DB09460 | Sodium carbonate                                                                               | -0.523 | 0.103  | 2.025  | -1.823 | -1.274 | 0.21  | 0.523 | 0.943 | 0.025 | 0.041 |
| DB01616 | Alverine                                                                                       | -0.521 | -0.385 | 0.686  | -0.462 | -0.824 | 0.331 | 0.508 | 0.814 | 0.458 | 0.13  |
| DB03501 | Galactose-uridine-5'-diphosphate                                                               | -0.521 | -0.341 | -0.612 | -0.635 | -0.699 | 0.262 | 0.415 | 0.155 | 0.108 | 0.106 |
| DB00437 | Allopurinol                                                                                    | -0.52  | -0.511 | 0.732  | -0.169 | -0.677 | 0.203 | 0.234 | 0.756 | 0.253 | 0.132 |
| DB00613 | Amodiaquine                                                                                    | -0.519 | -0.538 | 1.358  | 0.202  | -0.632 | 0.273 | 0.246 | 0.841 | 0.448 | 0.192 |
| DB02180 | Myristoyl-Coa                                                                                  | -0.518 | -0.306 | 1.449  | -1.289 | -0.741 | 0.182 | 0.334 | 0.885 | 0.06  | 0.112 |
| DB01580 | Oxprenolol                                                                                     | -0.515 | 0.092  | -1.41  | 0.64   | -1.426 | 0.282 | 0.521 | 0.06  | 0.686 | 0.048 |
| DB03674 |                                                                                                | -0.515 | -0.112 | 0.3    | -1.063 | -1.022 | 0.198 | 0.476 | 0.513 | 0.066 | 0.047 |
| DB08464 | METHYL 3-CHLORO-2-{3-[(2,5-DIHYDROXY-4-METHOXYPHENYL)AMINO]-3-OXOPROPYL}-4,6-DIHYDROXYBENZOATE | -0.514 | -1.009 | -0.866 | -0.061 | -0.124 | 0.174 | 0.098 | 0.101 | 0.359 | 0.332 |
| DB08465 | 2-(3-AMINO-2,5,6-TRIMETHOXYPHENYL)ETHYL 5-CHLORO-2,4-DIHYDROXYBENZOATE                         | -0.514 | -1.009 | -0.866 | -0.061 | -0.124 | 0.174 | 0.098 | 0.101 | 0.359 | 0.332 |
| DB00083 | Botulinum toxin type A                                                                         | -0.513 | -0.339 | 1.324  | 0.229  | -1.32  | 0.218 | 0.302 | 0.859 | 0.366 | 0.025 |
| DB01785 | Dimethylallyl Diphosphate                                                                      | -0.513 | -0.302 | 0.2    | -0.428 | -0.789 | 0.288 | 0.491 | 0.615 | 0.179 | 0.075 |
| DB03317 | Heme C                                                                                         | -0.513 | -0.567 | 1.053  | 0.17   | -0.458 | 0.17  | 0.183 | 0.837 | 0.577 | 0.266 |
| DB02123 | Glycochenodeoxycholic Acid                                                                     | -0.511 | -0.028 | 0      | -0.185 | -1.153 | 0.221 | 0.586 | 0.415 | 0.231 | 0.013 |
| DB00410 | Mupirocin                                                                                      | -0.51  | -0.042 | 0.246  | -0.823 | -1.525 | 0.229 | 0.635 | 0.529 | 0.108 | 0.001 |
| DB00488 | Altretamine                                                                                    | -0.51  | -0.321 | 0.188  | -1.088 | -0.787 | 0.428 | 0.409 | 0.492 | 0.123 | 0.381 |
| DB08827 | Lomitapide                                                                                     | -0.51  | -0.27  | -0.202 | -0.904 | -0.947 | 0.428 | 0.412 | 0.416 | 0.247 | 0.311 |
| DB00405 | Dexbrompheniramine                                                                             | -0.509 | -0.361 | 0.277  | -0.464 | -0.834 | 0.29  | 0.461 | 0.625 | 0.164 | 0.052 |
| DB09081 | Idebenone                                                                                      | -0.509 | 0      | 0.903  | -0.13  | -1.22  | 0.261 | 0.672 | 0.793 | 0.362 | 0.006 |
| DB00341 | Cetirizine                                                                                     | -0.508 | 0.144  | 0.035  | 0.072  | -1.493 | 0.237 | 0.611 | 0.369 | 0.298 | 0.013 |

|         |                                                                                              |        |        |        |        |        |       |       |       |       |       |
|---------|----------------------------------------------------------------------------------------------|--------|--------|--------|--------|--------|-------|-------|-------|-------|-------|
| DB08601 | tributylstannanyl                                                                            | -0.508 | -0.297 | 1.09   | -0.832 | 0.724  | 0.25  | 0.344 | 0.785 | 0.14  | 0.694 |
| DB03127 | Benzamidine                                                                                  | -0.507 | -1.022 | -1.156 | -1.193 | 0.022  | 0.205 | 0.122 | 0.074 | 0.079 | 0.387 |
| DB02475 | Deoxyguanidinoproclavaminic acid                                                             | -0.506 | -0.624 | 1.632  | 0.447  | -0.603 | 0.198 | 0.196 | 0.893 | 0.43  | 0.182 |
| DB00222 | Glimepiride                                                                                  | -0.503 | -0.29  | 0.846  | -0.019 | -0.876 | 0.239 | 0.445 | 0.773 | 0.446 | 0.056 |
| DB04883 | Darusentan                                                                                   | -0.503 | -0.5   | 0.917  | -0.114 | -0.704 | 0.198 | 0.24  | 0.788 | 0.264 | 0.139 |
| DB06268 | Sitaxentan                                                                                   | -0.503 | -0.5   | 0.917  | -0.114 | -0.704 | 0.198 | 0.24  | 0.788 | 0.264 | 0.139 |
| DB06403 | Ambrisentan                                                                                  | -0.503 | -0.5   | 0.917  | -0.114 | -0.704 | 0.198 | 0.24  | 0.788 | 0.264 | 0.139 |
| DB08932 | Macitentan                                                                                   | -0.503 | -0.5   | 0.917  | -0.114 | -0.704 | 0.198 | 0.24  | 0.788 | 0.264 | 0.139 |
| DB01295 | Bevantolol                                                                                   | -0.502 | 0.135  | -0.971 | 0.302  | -1.333 | 0.247 | 0.541 | 0.127 | 0.507 | 0.047 |
| DB06855 | 6-fluoro-2-(2-hydroxy-3-isobutoxy-phenyl)-1H-benzoimidazole-5-carboxamidine                  | -0.5   | 0.412  | -0.495 | -0.828 | -1.183 | 0.214 | 0.699 | 0.054 | 0.103 | 0.049 |
| DB06775 | Carglumic acid                                                                               | -0.499 | -0.15  | 0.546  | -0.433 | -1.058 | 0.341 | 0.643 | 0.706 | 0.2   | 0.007 |
| DB08298 |                                                                                              | -0.499 | 0.006  | 0.916  | -1.094 | -1.184 | 0.25  | 0.485 | 0.733 | 0.068 | 0.071 |
| DB08794 | Ethyl biscoumacetate                                                                         | -0.499 | 0.724  | -2.449 | -0.731 | -1.165 | 0.227 | 0.852 | 0.002 | 0.133 | 0.055 |
| DB01280 | Nelarabine                                                                                   | -0.498 | -0.237 | -0.091 | -1.081 | -0.559 | 0.25  | 0.562 | 0.42  | 0.024 | 0.203 |
| DB01858 | [1-(4-Fluorobenzyl)Cyclobutyl]Methyl (1s)-1-[Oxo(1h-Pyrazol-5-Ylamino)Acetyl]Pentylcarbamate | -0.498 | -0.455 | 1.448  | -0.063 | -0.402 | 0.222 | 0.254 | 0.886 | 0.237 | 0.275 |
| DB07513 | 7-[(3-CHLOROBENZYL)OXY]-4-[(METHYLAMINO)METHYL]-2H-CHROMEN-2-ONE                             | -0.498 | 0.723  | 1.089  | 0.523  | -2.482 | 0.266 | 0.77  | 0.792 | 0.572 | 0.004 |
| DB07967 | 9-CYCLOPENTYL-6-[2-(3-IMIDAZOL-1-YL-PROPOXY)-PHENYLAMINO]-9H-PURINE-2-CARBONITRILE           | -0.498 | -0.455 | 1.448  | -0.063 | -0.402 | 0.222 | 0.254 | 0.886 | 0.237 | 0.275 |
| DB09052 | Blinatumomab                                                                                 | -0.497 | -0.11  | -0.718 | -0.219 | -0.695 | 0.225 | 0.506 | 0.029 | 0.217 | 0.127 |
| DB00895 | Benzylpenicilloyl Polylysine                                                                 | -0.495 | -0.382 | 0.692  | -0.642 | -0.783 | 0.355 | 0.489 | 0.766 | 0.097 | 0.082 |
| DB02897 | Acetylphosphate                                                                              | -0.495 | -0.382 | 0.137  | -0.642 | -0.783 | 0.355 | 0.489 | 0.562 | 0.097 | 0.082 |
| DB06692 | Aprotinin                                                                                    | -0.495 | -0.003 | 2.252  | 0.435  | -0.814 | 0.279 | 0.458 | 0.967 | 0.456 | 0.138 |
| DB02740 | 3-Indolebutyric Acid                                                                         | -0.494 | 0.139  | -4.197 | 0.923  | -0.582 | 0.262 | 0.509 | 0     | 0.627 | 0.182 |
| DB07713 | (1S)-1-[[[(4'-methoxy-1,1'-biphenyl-4-yl)sulfonyl]amino]-2-methylpropylphosphonic acid       | -0.493 | -0.344 | 0.1    | 0.103  | -0.509 | 0.196 | 0.363 | 0.467 | 0.359 | 0.209 |
| DB00716 | Nedocromil                                                                                   | -0.492 | -0.279 | -0.033 | 0.143  | -0.053 | 0.205 | 0.283 | 0.356 | 0.447 | 0.354 |
| DB08660 | 1,2,5,8-tetrahydroxyanthracene-9,10-dione                                                    | -0.492 | -1.12  | -1.126 | -0.908 | -0.219 | 0.197 | 0.097 | 0.069 | 0.117 | 0.275 |
| DB00461 | Nabumetone                                                                                   | -0.491 | -0.079 | 1.084  | -1.306 | -1.3   | 0.241 | 0.427 | 0.792 | 0.052 | 0.045 |
| DB04600 | 4-[(3-BROMO-4-O-SULFAMOYLBENZYL)(4-CYANOPHENYL)AMINO]-4H-[1,2,4]-TRIAZOLE                    | -0.491 | -0.276 | 1.263  | -0.835 | -0.979 | 0.221 | 0.453 | 0.874 | 0.114 | 0.047 |
| DB04601 | 4-[(4-O-SULFAMOYLBENZYL)(4-CYANOPHENYL)AMINO]-4H-[1,2,4]-TRIAZOLE                            | -0.491 | -0.276 | 1.263  | -0.835 | -0.979 | 0.221 | 0.453 | 0.874 | 0.114 | 0.047 |
| DB07596 | (17beta)-17-(cyanomethyl)-2-methoxyestra-1(10),2,4-trien-3-yl sulfamate                      | -0.491 | -0.276 | 1.263  | -0.835 | -0.979 | 0.221 | 0.453 | 0.874 | 0.114 | 0.047 |
| DB01782 | 2,6-Dihydroanthra/1,9-Cd/Pyrazol-6-One                                                       | -0.489 | -0.066 | 0.316  | 0.187  | -0.405 | 0.244 | 0.39  | 0.564 | 0.513 | 0.279 |
| DB09242 | Moxonidine                                                                                   | -0.488 | -0.186 | 1.262  | -0.091 | -0.996 | 0.222 | 0.418 | 0.847 | 0.23  | 0.07  |
| DB02112 | Zk-806450                                                                                    | -0.487 | -0.547 | 0.13   | -0.013 | -0.359 | 0.218 | 0.198 | 0.475 | 0.288 | 0.299 |
| DB04424 | RPR128515                                                                                    | -0.487 | -0.547 | 0.13   | -0.013 | -0.359 | 0.218 | 0.198 | 0.475 | 0.288 | 0.299 |
| DB06845 | (S)-N-(4-carbamimidoylbenzyl)-1-(2-(cyclopentylamino)ethanoyl)pyrrolidine-2-carboxamide      | -0.487 | -0.547 | 0.13   | -0.013 | -0.359 | 0.218 | 0.198 | 0.475 | 0.288 | 0.299 |

|         |                                                                                                                                                               |        |        |        |        |        |       |       |       |       |       |
|---------|---------------------------------------------------------------------------------------------------------------------------------------------------------------|--------|--------|--------|--------|--------|-------|-------|-------|-------|-------|
| DB06850 | (S)-N-(4-carbamimidoylbenzyl)-1-(2-(cyclohexylamino)ethanoyl)pyrrolidine-2-carboxamide                                                                        | -0.487 | -0.547 | 0.13   | -0.013 | -0.359 | 0.218 | 0.198 | 0.475 | 0.288 | 0.299 |
| DB06853 | N-cycloheptylglycyl-N-(4-carbamimidoylbenzyl)-L-prolinamide                                                                                                   | -0.487 | -0.547 | 0.13   | -0.013 | -0.359 | 0.218 | 0.198 | 0.475 | 0.288 | 0.299 |
| DB06858 | N-cyclooctylglycyl-N-(4-carbamimidoylbenzyl)-L-prolinamide                                                                                                    | -0.487 | -0.547 | 0.13   | -0.013 | -0.359 | 0.218 | 0.198 | 0.475 | 0.288 | 0.299 |
| DB07088 | (S)-N-(4-carbamimidoylbenzyl)-1-(2-(cyclopentyloxy)ethanoyl)pyrrolidine-2-carboxamide                                                                         | -0.487 | -0.547 | 0.13   | -0.013 | -0.359 | 0.218 | 0.198 | 0.475 | 0.288 | 0.299 |
| DB07091 | (S)-N-(4-carbamimidoylbenzyl)-1-(2-(cyclohexyloxy)ethanoyl)pyrrolidine-2-carboxamide                                                                          | -0.487 | -0.547 | 0.13   | -0.013 | -0.359 | 0.218 | 0.198 | 0.475 | 0.288 | 0.299 |
| DB07095 | (S)-N-(4-carbamimidoylbenzyl)-1-(3-cyclopentylpropanoyl)pyrrolidine-2-carboxamide                                                                             | -0.487 | -0.547 | 0.13   | -0.013 | -0.359 | 0.218 | 0.198 | 0.475 | 0.288 | 0.299 |
| DB07131 | (S)-N-(4-carbamimidoylbenzyl)-1-(3-cyclohexylpropanoyl)pyrrolidine-2-carboxamide                                                                              | -0.487 | -0.547 | 0.13   | -0.013 | -0.359 | 0.218 | 0.198 | 0.475 | 0.288 | 0.299 |
| DB08254 | 2-NAPHTHALENESULFONIC ACID                                                                                                                                    | -0.487 | -0.547 | 0.13   | -0.013 | -0.359 | 0.218 | 0.198 | 0.475 | 0.288 | 0.299 |
| DB06288 | Amisulpride                                                                                                                                                   | -0.485 | -1     | 2.961  | 1.323  | -0.531 | 0.282 | 0.12  | 0.995 | 0.883 | 0.221 |
| DB00582 | Voriconazole                                                                                                                                                  | -0.484 | 0.076  | 1.001  | -0.127 | -1.314 | 0.264 | 0.692 | 0.817 | 0.374 | 0.005 |
| DB02049 | 2-[4-[4-(4-Chloro-Phenoxy)-Benzenesulfonyl]-Tetrahydro-Pyran-4-Yl]-N-Hydroxy-Acetamide                                                                        | -0.484 | -0.399 | 0.274  | -0.544 | -0.724 | 0.298 | 0.421 | 0.607 | 0.128 | 0.113 |
| DB03958 | 7-methyl-guanosine-5'-triphosphate-5'-guanosine                                                                                                               | -0.484 | -0.451 | 0.872  | -0.143 | -0.649 | 0.219 | 0.266 | 0.773 | 0.233 | 0.152 |
| DB00339 | Pyrazinamide                                                                                                                                                  | -0.483 | -0.136 | 0.455  | -1.354 | -1.226 | 0.232 | 0.516 | 0.638 | 0.025 | 0.016 |
| DB01024 | Mycophenolic acid                                                                                                                                             | -0.481 | -0.395 | -1.379 | -0.531 | -0.269 | 0.219 | 0.251 | 0.053 | 0.228 | 0.304 |
| DB06842 | (4R)-4-(3-butoxy-4-methoxybenzyl)imidazolidin-2-one                                                                                                           | -0.479 | -0.141 | 0.883  | -1.214 | -0.636 | 0.25  | 0.501 | 0.782 | 0.042 | 0.157 |
| DB00750 | Prilocaine                                                                                                                                                    | -0.478 | 0.158  | -1.859 | 0.398  | -1.262 | 0.27  | 0.541 | 0.01  | 0.524 | 0.064 |
| DB00035 | Desmopressin                                                                                                                                                  | -0.477 | -0.273 | -0.705 | -0.545 | -0.674 | 0.266 | 0.409 | 0.115 | 0.14  | 0.131 |
| DB00067 | Vasopressin                                                                                                                                                   | -0.477 | -0.273 | -0.705 | -0.545 | -0.674 | 0.266 | 0.409 | 0.115 | 0.14  | 0.131 |
| DB09232 | Cilnidipine                                                                                                                                                   | -0.476 | -0.345 | 0.417  | -0.433 | -0.834 | 0.261 | 0.402 | 0.675 | 0.154 | 0.067 |
| DB00232 | Methyclothiazide                                                                                                                                              | -0.475 | -0.193 | 1.44   | -0.974 | -1.084 | 0.26  | 0.494 | 0.893 | 0.089 | 0.025 |
| DB01288 | Fenoterol                                                                                                                                                     | -0.475 | 0.103  | -2.094 | 0.185  | -1.389 | 0.277 | 0.514 | 0.007 | 0.47  | 0.05  |
| DB03693 | N-(2-Aminoethyl)-5-Chloroisoquinoline-8-Sulfonamide                                                                                                           | -0.474 | 0.015  | -0.286 | -2.023 | -1.018 | 0.203 | 0.411 | 0.215 | 0.016 | 0.075 |
| DB09019 | Bromhexine                                                                                                                                                    | -0.474 | -0.172 | 0.216  | -0.46  | -1.074 | 0.24  | 0.505 | 0.554 | 0.135 | 0.025 |
| DB07530 | (1R,3R)-5-[(2E)-3-((1S,3R)-2,2,3-trimethyl-3-[6,6,6-trifluoro-5-hydroxy-5-(trifluoromethyl)hex-3-yn-1-yl]cyclopentyl)prop-2-en-1-ylidene]cyclohexane-1,3-diol | -0.47  | 0.137  | 1.083  | 1.256  | -1.593 | 0.277 | 0.512 | 0.785 | 0.76  | 0.031 |
| DB08742 | 1,3-CYCLOHEXANEDIOL, 4-METHYLENE-5-[(2E)-[(1S,3AS,7AS)-OCTAHYDRO-1-(5-HYDROXY-5-METHYL-1,3-HEXADIYNYL)-7A-METHYL-4H-INDEN-4-YLIDENE]ETHYLIDENE]-, (1R,3S,5Z)  | -0.47  | 0.137  | 1.083  | 1.256  | -1.593 | 0.277 | 0.512 | 0.785 | 0.76  | 0.031 |
| DB00859 | Penicillamine                                                                                                                                                 | -0.469 | -0.145 | -1.117 | -0.476 | -0.786 | 0.391 | 0.679 | 0.02  | 0.175 | 0.165 |
| DB01997 | 3-Bromo-7-Nitroindazole                                                                                                                                       | -0.469 | 0.799  | 1.037  | -0.228 | -3.064 | 0.261 | 0.751 | 0.78  | 0.305 | 0.001 |
| DB02044 | N-(3-(Aminomethyl)Benzyl)Acetamidine                                                                                                                          | -0.469 | 0.799  | 1.037  | -0.228 | -3.064 | 0.261 | 0.751 | 0.78  | 0.305 | 0.001 |
| DB02335 | 2-Aminothiazoline                                                                                                                                             | -0.469 | 0.799  | 1.037  | -0.228 | -3.064 | 0.261 | 0.751 | 0.78  | 0.305 | 0.001 |

|         |                                                                                                                                |        |        |        |        |        |       |       |       |       |       |
|---------|--------------------------------------------------------------------------------------------------------------------------------|--------|--------|--------|--------|--------|-------|-------|-------|-------|-------|
| DB02539 |                                                                                                                                | -0.469 | 0.799  | 1.037  | -0.228 | -3.064 | 0.261 | 0.751 | 0.78  | 0.305 | 0.001 |
| DB02833 | [4-(2-Amino-4-Methyl-Thiazol-5-Yl)-Pyrimidin-2-Yl]-(3-Nitro-Phenyl)-Amine                                                      | -0.469 | -0.041 | -0.87  | -1.202 | -0.117 | 0.204 | 0.38  | 0.144 | 0.079 | 0.363 |
| DB03910 | S,S'-(1,3-Phenylene-Bis(1,2-Ethanediy))Bis-Isothiourea                                                                         | -0.469 | 0.799  | 1.037  | -0.228 | -3.064 | 0.261 | 0.751 | 0.78  | 0.305 | 0.001 |
| DB04223 | Nitroarginine                                                                                                                  | -0.469 | 0.799  | 1.037  | -0.228 | -3.064 | 0.261 | 0.751 | 0.78  | 0.305 | 0.001 |
| DB07003 | (2S)-2-methyl-2,3-dihydrothieno[2,3-f][1,4]oxazepin-5-amine                                                                    | -0.469 | 0.799  | 1.037  | -0.228 | -3.064 | 0.261 | 0.751 | 0.78  | 0.305 | 0.001 |
| DB07389 | N-[2-(6-AMINO-4-METHYLPYRIDIN-2-YL)ETHYL]-4-CYANOBENZAMIDE                                                                     | -0.469 | 0.799  | 1.037  | -0.228 | -3.064 | 0.261 | 0.751 | 0.78  | 0.305 | 0.001 |
| DB00693 | Fluorescein                                                                                                                    | -0.468 | 0.245  | 1.028  | -0.942 | -1.357 | 0.235 | 0.701 | 0.792 | 0.084 | 0.009 |
| DB02869 | 3-amino-5-phenylpentane                                                                                                        | -0.465 | -0.254 | 0.909  | -0.558 | -0.752 | 0.377 | 0.545 | 0.799 | 0.114 | 0.1   |
| DB06803 | Niclosamide                                                                                                                    | -0.465 | 0.167  | -0.505 | -0.595 | -0.41  | 0.209 | 0.5   | 0.259 | 0.208 | 0.287 |
| DB01359 | Penbutolol                                                                                                                     | -0.462 | 0.028  | -1.91  | 0.368  | -1.052 | 0.279 | 0.458 | 0.009 | 0.528 | 0.099 |
| DB03600 | Capric acid                                                                                                                    | -0.462 | -0.383 | 0.437  | -0.332 | -0.731 | 0.291 | 0.345 | 0.664 | 0.193 | 0.103 |
| DB01549 | Rolicyclidine                                                                                                                  | -0.459 | -0.223 | 0.982  | -0.511 | -0.877 | 0.341 | 0.563 | 0.81  | 0.138 | 0.052 |
| DB00356 | Chlorzoxazone                                                                                                                  | -0.456 | 0.548  | 0.754  | -0.134 | -2.803 | 0.287 | 0.644 | 0.615 | 0.353 | 0.002 |
| DB00983 | Formoterol                                                                                                                     | -0.456 | -0.426 | -1.344 | -0.335 | 0.021  | 0.196 | 0.242 | 0.064 | 0.289 | 0.389 |
| DB13161 | Nusinersen                                                                                                                     | -0.456 | -0.051 | 2.18   | -1.832 | -1.255 | 0.273 | 0.436 | 0.983 | 0.017 | 0.058 |
| DB00737 | Meclizine                                                                                                                      | -0.455 | 0.044  | -0.247 | -0.199 | -1.282 | 0.252 | 0.643 | 0.283 | 0.212 | 0.016 |
| DB07863 | 2-chloro-5-nitro-N-phenylbenzamide                                                                                             | -0.454 | -0.194 | 1.294  | -0.015 | 0.003  | 0.295 | 0.369 | 0.886 | 0.395 | 0.418 |
| DB08402 | 2-[(2,4-DICHLOROBENZOYL)AMINO]-5-(PYRIMIDIN-2-YLOXY)BENZOIC ACID                                                               | -0.454 | -0.194 | 1.294  | -0.015 | 0.003  | 0.295 | 0.369 | 0.886 | 0.395 | 0.418 |
| DB02839 | 2,4-Dihydroxybenzoic Acid                                                                                                      | -0.453 | -0.147 | 0.728  | -1.356 | -1.01  | 0.285 | 0.536 | 0.748 | 0.024 | 0.027 |
| DB01620 | Pheniramine                                                                                                                    | -0.452 | -0.034 | 0.828  | 0.191  | -0.999 | 0.276 | 0.6   | 0.768 | 0.518 | 0.035 |
| DB01905 | 2-(2-Hydroxy-5-Methoxy-Phenyl)-1h-Benzimidazole-5-Carboxamidine                                                                | -0.451 | -0.373 | 0.054  | -0.169 | -0.483 | 0.262 | 0.333 | 0.433 | 0.232 | 0.236 |
| DB02526 | CRA_10655                                                                                                                      | -0.451 | -0.373 | 0.054  | -0.169 | -0.483 | 0.262 | 0.333 | 0.433 | 0.232 | 0.236 |
| DB03876 | Thieno[2,3-B]Pyridine-2-Carboxamidine                                                                                          | -0.451 | -0.373 | 0.054  | -0.169 | -0.483 | 0.262 | 0.333 | 0.433 | 0.232 | 0.236 |
| DB00968 | Methyl dopa                                                                                                                    | -0.447 | 0.571  | -1.592 | -0.317 | -0.904 | 0.256 | 0.729 | 0.046 | 0.36  | 0.145 |
| DB00697 | Tizanidine                                                                                                                     | -0.445 | -0.059 | 1.696  | -0.118 | -0.966 | 0.255 | 0.497 | 0.916 | 0.227 | 0.065 |
| DB01009 | Ketoprofen                                                                                                                     | -0.445 | -0.179 | 0.659  | -0.721 | -0.342 | 0.285 | 0.366 | 0.613 | 0.116 | 0.286 |
| DB08150 | 4-(4-chlorobenzyl)-1-(7H-pyrrolo[2,3-d]pyrimidin-4-yl)piperidin-4-aminium                                                      | -0.445 | -1.064 | 0.318  | 0.036  | -0.502 | 0.205 | 0.076 | 0.527 | 0.444 | 0.196 |
| DB08756 | (R)-TRANS-4-(1-AMINOETHYL)-N-(4-PYRIDYL) CYCLOHEXANECARBOXAMIDE                                                                | -0.442 | -0.781 | 0.735  | -0.535 | -0.832 | 0.223 | 0.155 | 0.543 | 0.228 | 0.133 |
| DB11619 | Gestrinone                                                                                                                     | -0.442 | -0.542 | -1.006 | -0.432 | -0.135 | 0.211 | 0.205 | 0.08  | 0.229 | 0.312 |
| DB08782 | 4-(2-AMINOETHYL)BENZENESULFONAMIDE                                                                                             | -0.441 | -0.081 | 1.181  | -1.022 | -1.091 | 0.286 | 0.563 | 0.843 | 0.083 | 0.026 |
| DB00870 | Suprofen                                                                                                                       | -0.44  | 0.202  | 2.351  | -1.327 | -1.555 | 0.25  | 0.644 | 0.964 | 0.035 | 0.005 |
| DB07482 | (2R)-N-[(2R)-2-(DIHYDROXYBORYL)-1-L-PROLYLPYRROLIDIN-2-YL]-N-[(5R)-5-(DIHYDROXYBORYL)-1-L-PROLYLPYRROLIDIN-2-YL]-L-PROLINAMIDE | -0.438 | -0.253 | -0.158 | -0.374 | -0.621 | 0.356 | 0.497 | 0.368 | 0.183 | 0.159 |
| DB08220 | (8alpha,10alpha,13alpha,17beta)-17-[(4-hydroxyphenyl)carbonyl]androsta-3,5-diene-3-carboxylic acid                             | -0.438 | 0.393  | 0.818  | 0.846  | -2.068 | 0.279 | 0.676 | 0.674 | 0.599 | 0.003 |
| DB00264 | Metoprolol                                                                                                                     | -0.435 | 0.155  | -2.054 | 0.814  | -0.899 | 0.311 | 0.526 | 0.01  | 0.761 | 0.119 |
| DB00896 | Rimexolone                                                                                                                     | -0.434 | 0.006  | 0.558  | -0.884 | -1.282 | 0.296 | 0.448 | 0.338 | 0.137 | 0.07  |

|         |                                                                                                      |        |        |        |        |        |       |       |       |       |       |
|---------|------------------------------------------------------------------------------------------------------|--------|--------|--------|--------|--------|-------|-------|-------|-------|-------|
| DB02266 | Flufenamic Acid                                                                                      | -0.434 | -1.117 | 0.965  | -0.456 | 0.138  | 0.224 | 0.089 | 0.775 | 0.256 | 0.469 |
| DB01592 | Iron                                                                                                 | -0.433 | -0.779 | -0.803 | 0.467  | 0.548  | 0.292 | 0.18  | 0.142 | 0.602 | 0.642 |
| DB01120 | Gliclazide                                                                                           | -0.432 | -0.299 | 0.525  | 0.174  | -0.298 | 0.301 | 0.434 | 0.662 | 0.538 | 0.394 |
| DB08388 | 5-(2-ETHOXYETHYL)-5-[4-(4-FLUOROPHENOXY)PHENOXY]PYRIMIDIN E-2,4,6(1H,3H,5H)-TRIONE                   | -0.431 | -0.167 | -0.105 | -0.241 | -0.727 | 0.27  | 0.489 | 0.344 | 0.205 | 0.099 |
| DB01198 | Zopiclone                                                                                            | -0.43  | -0.528 | 1.917  | -0.466 | -0.578 | 0.262 | 0.24  | 0.946 | 0.166 | 0.167 |
| DB03352 | S-Arsonocysteine                                                                                     | -0.43  | -0.057 | 1.247  | 0.065  | -1.016 | 0.32  | 0.617 | 0.857 | 0.508 | 0.032 |
| DB00553 | Methoxsalen                                                                                          | -0.429 | -0.27  | 0.189  | -0.348 | -0.821 | 0.276 | 0.389 | 0.535 | 0.167 | 0.08  |
| DB00880 | Chlorothiazide                                                                                       | -0.429 | 0.168  | 1.586  | -0.821 | -1.586 | 0.285 | 0.667 | 0.909 | 0.13  | 0.006 |
| DB04270 | (S)-3-(4-(2-Carbazol-9-Yl-Ethoxy)-Phenyl)-2-Ethoxy-Propionic Acid                                    | -0.429 | -0.301 | 1.124  | 1.441  | -1.539 | 0.295 | 0.321 | 0.816 | 0.833 | 0.032 |
| DB05416 | Cardarine                                                                                            | -0.429 | -0.301 | 1.124  | 1.441  | -1.539 | 0.295 | 0.321 | 0.816 | 0.833 | 0.032 |
| DB07053 | 2-{5-[3-(7-PROPYL-3-TRIFLUOROMETHYLBENZO[D]ISOXAZOL-6-YLOXY)PROPOXY]INDOL-1-YL}ETHANOIC ACID         | -0.429 | -0.301 | 1.124  | 1.441  | -1.539 | 0.295 | 0.321 | 0.816 | 0.833 | 0.032 |
| DB07070 | (2S)-2-{3-[[[2-fluoro-4-(trifluoromethyl)phenyl]carbonyl]amino]methyl]-4-methoxybenzyl}butanoic acid | -0.429 | -0.301 | 1.124  | 1.441  | -1.539 | 0.295 | 0.321 | 0.816 | 0.833 | 0.032 |
| DB08078 | {4-[3-(4-acetyl-3-hydroxy-2-propylphenoxy)propoxy]phenoxy}acetic acid                                | -0.429 | -0.301 | 1.124  | 1.441  | -1.539 | 0.295 | 0.321 | 0.816 | 0.833 | 0.032 |
| DB08915 | Aleglitazar                                                                                          | -0.429 | -0.301 | 1.124  | 1.441  | -1.539 | 0.295 | 0.321 | 0.816 | 0.833 | 0.032 |
| DB09006 | Clinofibrate                                                                                         | -0.429 | -0.301 | 1.124  | 1.441  | -1.539 | 0.295 | 0.321 | 0.816 | 0.833 | 0.032 |
| DB04948 | Lofexidine                                                                                           | -0.427 | -0.353 | 1.842  | -0.387 | -0.863 | 0.277 | 0.363 | 0.936 | 0.162 | 0.07  |
| DB08588 | 2-((2-[(3R)-3-AMINOPIPERIDIN-1-YL]-4-OXOQUINAZOLIN-3(4H)-YL}METHYL)BENZONITRILE                      | -0.426 | -0.225 | -0.101 | -0.368 | -0.599 | 0.383 | 0.522 | 0.389 | 0.169 | 0.175 |
| DB00388 | Phenylephrine                                                                                        | -0.425 | 0.015  | -1.002 | 0.464  | -1.928 | 0.296 | 0.448 | 0.125 | 0.572 | 0.019 |
| DB00525 | Tolnaftate                                                                                           | -0.425 | 0.012  | 0.525  | -0.127 | -1.066 | 0.308 | 0.686 | 0.692 | 0.389 | 0.017 |
| DB08073 | (2S)-1-(1H-INDOL-3-YL)-3-[[5-(3-METHYL-1H-INDAZOL-5-YL)PYRIDIN-3-YL]OXY]PROPAN-2-AMINE               | -0.423 | -0.754 | 0.135  | -0.32  | -0.157 | 0.236 | 0.134 | 0.382 | 0.298 | 0.325 |
| DB00960 | Pindolol                                                                                             | -0.422 | -0.306 | -1.488 | 1.161  | -1.045 | 0.296 | 0.329 | 0.041 | 0.839 | 0.107 |
| DB00736 | Esomeprazole                                                                                         | -0.421 | -0.2   | 0.154  | -0.92  | -0.539 | 0.377 | 0.563 | 0.496 | 0.071 | 0.23  |
| DB01438 | Phenazopyridine                                                                                      | -0.418 | -0.033 | 0.487  | -0.175 | -1.069 | 0.286 | 0.445 | 0.528 | 0.308 | 0.064 |
| DB02836 | Guanosine 5'-Diphosphate 2':3'-Cyclic Monophosphate                                                  | -0.417 | -0.265 | 0.532  | -0.976 | 0.026  | 0.211 | 0.293 | 0.353 | 0.102 | 0.398 |
| DB04077 |                                                                                                      | -0.416 | -0.601 | 0.56   | 0.326  | -0.285 | 0.296 | 0.249 | 0.584 | 0.513 | 0.319 |
| DB07988 | 2-[3-(5-MERCAPTO-[1,3,4]THIADIAZOL-2YL)-UREIDO]-N-METHYL-3-PENTAFLUOROPHENYL-PROPIONAMIDE            | -0.416 | -0.221 | -0.341 | 0.706  | 0.192  | 0.308 | 0.365 | 0.079 | 0.525 | 0.484 |
| DB09128 | Brexipirazole                                                                                        | -0.416 | -0.924 | 1.65   | 0.944  | -1.365 | 0.305 | 0.141 | 0.904 | 0.698 | 0.063 |
| DB00701 | Amprenavir                                                                                           | -0.415 | -0.325 | -0.306 | -1.125 | -1.189 | 0.295 | 0.331 | 0.225 | 0.066 | 0.051 |
| DB01004 | Ganciclovir                                                                                          | -0.415 | -0.156 | 0.513  | -0.436 | -0.83  | 0.358 | 0.571 | 0.693 | 0.15  | 0.063 |
| DB01034 | Cerulein                                                                                             | -0.415 | 0.335  | 0.591  | -1.34  | -1.103 | 0.275 | 0.652 | 0.599 | 0.04  | 0.06  |
| DB03424 | Ubenimex                                                                                             | -0.415 | -0.094 | 0.336  | 0.611  | -0.26  | 0.316 | 0.411 | 0.472 | 0.484 | 0.331 |
| DB04228 | (2r)-Amino(3,5-Dihydroxyphenyl)Acetic Acid                                                           | -0.415 | -0.156 | 0.513  | -0.436 | -0.83  | 0.358 | 0.571 | 0.693 | 0.15  | 0.063 |
| DB00373 | Timolol                                                                                              | -0.414 | 0.263  | -1.941 | 0.253  | -1.264 | 0.297 | 0.549 | 0.01  | 0.489 | 0.058 |
| DB03144 | N-Omega-Hydroxy-L-Arginine                                                                           | -0.411 | 0.483  | 1.142  | -0.54  | -2.99  | 0.298 | 0.627 | 0.811 | 0.217 | 0.001 |
| DB00650 | Leucovorin                                                                                           | -0.409 | -0.108 | 1.09   | 0.102  | -1.291 | 0.278 | 0.467 | 0.832 | 0.326 | 0.017 |
| DB00848 | Levamisole                                                                                           | -0.409 | -0.235 | 0.452  | -0.185 | -0.514 | 0.306 | 0.408 | 0.64  | 0.228 | 0.224 |
| DB06813 | Pralatrexate                                                                                         | -0.409 | -0.108 | 1.09   | 0.102  | -1.291 | 0.278 | 0.467 | 0.832 | 0.326 | 0.017 |

|         |                                                                                                                                                          |        |        |        |        |        |       |       |       |       |       |
|---------|----------------------------------------------------------------------------------------------------------------------------------------------------------|--------|--------|--------|--------|--------|-------|-------|-------|-------|-------|
| DB08734 | 6,6-DIMETHYL-1-[3-(2,4,5-TRICHLOROPHENOXY)PROPOXY]-1,6-DIHYDRO-1,3,5-TRIAZINE-2,4-DIAMINE                                                                | -0.409 | -0.108 | 1.09   | 0.102  | -1.291 | 0.278 | 0.467 | 0.832 | 0.326 | 0.017 |
| DB07126 | O6-CYCLOHEXYLMETHOXY-2-(4'-SULPHAMOYLANILINO) PURINE                                                                                                     | -0.407 | -0.385 | -0.421 | -0.676 | -0.543 | 0.216 | 0.25  | 0.236 | 0.193 | 0.197 |
| DB03747 | 3ar,5r,6s,7r,7ar-5-Hydroxymethyl-2-Methyl-5,6,7,7a-Tetrahydro-3ah-Pyrano[3,2-D]Thiazole-6,7-Diol                                                         | -0.406 | 0.001  | 0.266  | 0.019  | -0.891 | 0.268 | 0.505 | 0.473 | 0.279 | 0.077 |
| DB00117 | Histidine                                                                                                                                                | -0.405 | 0.077  | 1.355  | -1.141 | -1.811 | 0.282 | 0.527 | 0.833 | 0.062 | 0.011 |
| DB02343 | 3,6,9,12,15-Pentaoxaheptadecane                                                                                                                          | -0.403 | -0.269 | 0.965  | -0.185 | -0.725 | 0.282 | 0.401 | 0.756 | 0.222 | 0.103 |
| DB00107 | Oxytocin                                                                                                                                                 | -0.402 | -0.07  | -0.74  | -0.241 | -0.824 | 0.303 | 0.49  | 0.124 | 0.206 | 0.125 |
| DB01863 | Inositol 1,3,4,5-Tetrakisphosphate                                                                                                                       | -0.402 | -0.605 | -0.793 | -0.454 | 0.345  | 0.231 | 0.186 | 0.127 | 0.25  | 0.578 |
| DB00322 | Floxuridine                                                                                                                                              | -0.401 | -0.238 | 0.562  | -0.35  | -0.718 | 0.384 | 0.544 | 0.722 | 0.227 | 0.093 |
| DB00432 | Trifluridine                                                                                                                                             | -0.401 | -0.238 | 0.562  | -0.35  | -0.718 | 0.384 | 0.544 | 0.722 | 0.227 | 0.093 |
| DB00448 | Lansoprazole                                                                                                                                             | -0.401 | 0.232  | 0.833  | -0.892 | 0.54   | 0.302 | 0.539 | 0.687 | 0.147 | 0.658 |
| DB01037 | Selegiline                                                                                                                                               | -0.401 | 0.014  | 1.128  | -0.501 | -1.07  | 0.344 | 0.656 | 0.854 | 0.13  | 0.025 |
| DB01101 | Capecitabine                                                                                                                                             | -0.401 | -0.238 | 0.562  | -0.35  | -0.718 | 0.384 | 0.544 | 0.722 | 0.227 | 0.093 |
| DB01276 | Exenatide                                                                                                                                                | -0.401 | -0.238 | -0.083 | -0.35  | -0.567 | 0.384 | 0.544 | 0.413 | 0.227 | 0.205 |
| DB01632 | 5-O-phosphono-alpha-D-ribofuranosyl diphosphate                                                                                                          | -0.401 | -0.478 | 1.206  | 0.138  | -0.504 | 0.278 | 0.231 | 0.83  | 0.329 | 0.205 |
| DB02824 | N-Pyridoxyl-Glycine-5-Monophosphate                                                                                                                      | -0.401 | -0.108 | 0.929  | -0.001 | -1.069 | 0.276 | 0.526 | 0.797 | 0.294 | 0.037 |
| DB03800 | Deoxyuridine monophosphate                                                                                                                               | -0.401 | -0.238 | 0.562  | -0.35  | -0.718 | 0.384 | 0.544 | 0.722 | 0.227 | 0.093 |
| DB06655 | Liraglutide                                                                                                                                              | -0.401 | -0.238 | -0.083 | -0.35  | -0.567 | 0.384 | 0.544 | 0.413 | 0.227 | 0.205 |
| DB09043 | Albiglutide                                                                                                                                              | -0.401 | -0.238 | -0.083 | -0.35  | -0.567 | 0.384 | 0.544 | 0.413 | 0.227 | 0.205 |
| DB09045 | Dulaglutide                                                                                                                                              | -0.401 | -0.238 | -0.083 | -0.35  | -0.567 | 0.384 | 0.544 | 0.413 | 0.227 | 0.205 |
| DB09265 | Lixisenatide                                                                                                                                             | -0.401 | -0.238 | -0.083 | -0.35  | -0.567 | 0.384 | 0.544 | 0.413 | 0.227 | 0.205 |
| DB11256 | Levomefolic acid                                                                                                                                         | -0.401 | -0.238 | 0.562  | -0.35  | -0.718 | 0.384 | 0.544 | 0.722 | 0.227 | 0.093 |
| DB00446 | Chloramphenicol                                                                                                                                          | -0.399 | -0.083 | 0.648  | -0.315 | -0.952 | 0.388 | 0.633 | 0.724 | 0.204 | 0.035 |
| DB07776 | Flavone                                                                                                                                                  | -0.398 | -0.584 | -1.511 | -2.205 | 1.27   | 0.207 | 0.201 | 0.054 | 0.011 | 0.93  |
| DB06953 | 2-CHLORO-5-(3-CHLORO-PHENYL)-6-[(4-CYANO-PHENYL)-(3-METHYL-3H-IMIDAZOL-4-YL)-METHOXYMETHYL]-NICOTINONITRILE                                              | -0.397 | 0.814  | 1.593  | 0.48   | -1.888 | 0.274 | 0.83  | 0.887 | 0.437 | 0.001 |
| DB07216 | (11S)-8-CHLORO-11-[1-(METHYLSULFONYL)PIPERIDIN-4-YL]-6-PIPERAZIN-1-YL-11H-BENZO[5,6]CYCLOHEPTA[1,2-B]PYRIDINE                                            | -0.397 | 0.814  | 1.593  | 0.48   | -1.888 | 0.274 | 0.83  | 0.887 | 0.437 | 0.001 |
| DB07895 | ALPHA-HYDROXYFARNESYLPHOSPHONIC ACID                                                                                                                     | -0.397 | 0.814  | 1.593  | 0.48   | -1.888 | 0.274 | 0.83  | 0.887 | 0.437 | 0.001 |
| DB08676 | (20S)-19,20,22,23-TETRAHYDRO-19-OXO-5H,21H-18,20-ETHANO-12,14-ETHENO-6,10-METHENOBENZ[D]IMIDAZO[4,3-L][1,6,9,13]OXATRIAZACYCLONAODECOSINE-9-CARBONITRILE | -0.397 | 0.814  | 1.593  | 0.48   | -1.888 | 0.274 | 0.83  | 0.887 | 0.437 | 0.001 |
| DB00694 | Daunorubicin                                                                                                                                             | -0.396 | 0.097  | -1.606 | -1.854 | -0.778 | 0.219 | 0.468 | 0.031 | 0.025 | 0.164 |
| DB01917 | Putrescine                                                                                                                                               | -0.395 | 0.318  | 0.114  | -0.039 | -1.438 | 0.294 | 0.762 | 0.465 | 0.273 | 0.009 |
| DB08301 | N-([4-(AMINOSULFONYL)PHENYL]AMINO)CARBONYL-4-METHYLBENZENESULFONAMIDE                                                                                    | -0.395 | -0.148 | 1.424  | -0.062 | -0.853 | 0.338 | 0.524 | 0.902 | 0.362 | 0.077 |
| DB00932 | Tipranavir                                                                                                                                               | -0.393 | -0.687 | 1.307  | 0.116  | -0.029 | 0.305 | 0.181 | 0.851 | 0.343 | 0.416 |
| DB08023 | N-cyclohexyl-4-imidazo[1,2-a]pyridin-3-yl-N-methylpyrimidin-2-amine                                                                                      | -0.392 | 0.086  | -0.418 | 0.474  | -0.81  | 0.282 | 0.553 | 0.068 | 0.457 | 0.125 |

|         |                                                                                                  |        |        |        |        |        |       |       |       |       |       |
|---------|--------------------------------------------------------------------------------------------------|--------|--------|--------|--------|--------|-------|-------|-------|-------|-------|
| DB08026 | 2-{4-[(4-imidazo[1,2-a]pyridin-3-ylpyrimidin-2-yl)amino]piperidin-1-yl}-N-methylacetamide        | -0.392 | 0.086  | -0.418 | 0.474  | -0.81  | 0.282 | 0.553 | 0.068 | 0.457 | 0.125 |
| DB07545 | N-{3-[(4-{[3-(TRIFLUOROMETHYL)PHENYL]AMINO}PYRIMIDIN-2-YL)AMINO]PHENYL}CYCLOPROPANECARBONOXAMIDE | -0.389 | -0.375 | 0.976  | -0.551 | -0.341 | 0.227 | 0.281 | 0.583 | 0.231 | 0.263 |
| DB05251 |                                                                                                  | -0.388 | -0.09  | -0.147 | -0.236 | -0.764 | 0.328 | 0.522 | 0.329 | 0.203 | 0.116 |
| DB06196 | Icatibant                                                                                        | -0.387 | -0.176 | 0.563  | -0.22  | -0.733 | 0.413 | 0.574 | 0.695 | 0.382 | 0.108 |
| DB08950 | Indoramin                                                                                        | -0.384 | -0.432 | 3.175  | 0.3    | -1.404 | 0.297 | 0.275 | 0.993 | 0.357 | 0.062 |
| DB04716 | 2-(1,1-DIMETHYLETHYL)9-FLUORO-3,6-DIHYDRO-7H-BENZ[H]-IMIDAZ[4,5-F]ISOQUINOLIN-7-ONE              | -0.383 | 0.37   | -1.581 | -1.698 | -0.763 | 0.258 | 0.604 | 0.044 | 0.024 | 0.161 |
| DB00830 | Phenmetrazine                                                                                    | -0.382 | -0.175 | 0.201  | -0.509 | -0.892 | 0.346 | 0.571 | 0.538 | 0.125 | 0.048 |
| DB08992 | Eperisone                                                                                        | -0.382 | -0.07  | 0.739  | -0.441 | -1.01  | 0.312 | 0.556 | 0.734 | 0.155 | 0.033 |
| DB02471 | Nojirimycine Tetrazole                                                                           | -0.38  | -0.172 | 0.977  | -0.445 | -0.837 | 0.368 | 0.564 | 0.812 | 0.166 | 0.048 |
| DB01601 | Lopinavir                                                                                        | -0.378 | -0.156 | 0.067  | -0.159 | -0.702 | 0.35  | 0.533 | 0.442 | 0.238 | 0.119 |
| DB04368 | Bb-3497                                                                                          | -0.378 | -0.494 | 0.383  | 0.272  | -0.041 | 0.314 | 0.261 | 0.499 | 0.337 | 0.444 |
| DB01556 | Chlorphentermine                                                                                 | -0.377 | -0.155 | 0.338  | -0.465 | -0.716 | 0.456 | 0.612 | 0.639 | 0.148 | 0.099 |
| DB04695 | Farnesyl thiopyrophosphate                                                                       | -0.377 | -0.172 | 0.576  | -0.184 | -0.496 | 0.347 | 0.452 | 0.653 | 0.218 | 0.221 |
| DB07817 | 1-{3-[(4-pyridin-2-yl)piperazin-1-yl)sulfonyl]phenyl}-3-(1,3-thiazol-2-yl)urea                   | -0.377 | 0.077  | -0.456 | 0.408  | -0.57  | 0.289 | 0.537 | 0.061 | 0.419 | 0.199 |
| DB07856 | 6-{4-[4-(4-CHLOROPHENYL)PIPERIDIN-4-YL]PHENYL}-9H-PURINE                                         | -0.377 | 0.045  | 1.17   | 0.263  | -0.903 | 0.248 | 0.421 | 0.831 | 0.473 | 0.108 |
| DB01015 | Sulfamethoxazole                                                                                 | -0.373 | -0.321 | 0.713  | -1.042 | -0.98  | 0.448 | 0.463 | 0.748 | 0.042 | 0.036 |
| DB04324 | Ovalicin                                                                                         | -0.373 | -0.171 | 1.042  | 0.045  | -0.832 | 0.315 | 0.456 | 0.813 | 0.336 | 0.083 |
| DB04339 | Carbocisteine                                                                                    | -0.373 | -0.321 | 0.713  | -1.042 | -0.98  | 0.448 | 0.463 | 0.748 | 0.042 | 0.036 |
| DB06203 | Alogliptin                                                                                       | -0.372 | 0.544  | 0.695  | 0.571  | -1.322 | 0.29  | 0.711 | 0.671 | 0.583 | 0.057 |
| DB08987 | Etidocaine                                                                                       | -0.372 | -0.135 | 1.146  | 0.761  | -0.761 | 0.354 | 0.516 | 0.825 | 0.805 | 0.099 |
| DB02287 | 2-(2-Hydroxy-Phenyl)-3h-Benzoimidazole-5-Carboxamide                                             | -0.371 | -0.32  | 0.406  | 0.404  | -0.231 | 0.311 | 0.318 | 0.54  | 0.389 | 0.33  |
| DB02463 | 2-(2-Hydroxy-Phenyl)-1h-Indole-5-Carboxamide                                                     | -0.371 | -0.32  | 0.406  | 0.404  | -0.231 | 0.311 | 0.318 | 0.54  | 0.389 | 0.33  |
| DB03173 | CRA_10433                                                                                        | -0.371 | -0.32  | 0.406  | 0.404  | -0.231 | 0.311 | 0.318 | 0.54  | 0.389 | 0.33  |
| DB04215 | CRA_9076                                                                                         | -0.371 | -0.32  | 0.406  | 0.404  | -0.231 | 0.311 | 0.318 | 0.54  | 0.389 | 0.33  |
| DB04299 | Maleic Acid                                                                                      | -0.371 | 0.444  | 0.792  | -1.441 | -0.785 | 0.318 | 0.697 | 0.708 | 0.049 | 0.13  |
| DB04563 | CRA_9678                                                                                         | -0.371 | -0.32  | 0.406  | 0.404  | -0.231 | 0.311 | 0.318 | 0.54  | 0.389 | 0.33  |
| DB07229 | 3-{5-[AMINO(IMINIO)METHYL]-1H-INDOL-2-YL}-5-METHOXY-1,1'-BIPHENYL-2-OLATE                        | -0.371 | -0.32  | 0.406  | 0.404  | -0.231 | 0.311 | 0.318 | 0.54  | 0.389 | 0.33  |
| DB04932 | Defibrotide                                                                                      | -0.369 | -0.068 | -0.33  | -0.426 | -0.659 | 0.385 | 0.621 | 0.275 | 0.147 | 0.149 |
| DB04954 | Tecadenoson                                                                                      | -0.369 | -0.068 | -0.33  | -0.426 | -0.659 | 0.385 | 0.621 | 0.275 | 0.147 | 0.149 |
| DB05511 | Piclidenoson                                                                                     | -0.369 | -0.068 | -0.33  | -0.426 | -0.659 | 0.385 | 0.621 | 0.275 | 0.147 | 0.149 |
| DB00204 | Dofetilide                                                                                       | -0.368 | -0.133 | 1.172  | 0.377  | -0.886 | 0.404 | 0.562 | 0.9   | 0.792 | 0.076 |
| DB05239 | Cobimetinib                                                                                      | -0.366 | -0.364 | 0.92   | -0.226 | 0.17   | 0.309 | 0.318 | 0.705 | 0.276 | 0.498 |
| DB06777 | Chenodeoxycholic acid                                                                            | -0.366 | 0.372  | -0.242 | 0.224  | -1.795 | 0.31  | 0.667 | 0.236 | 0.378 | 0.013 |
| DB08911 | Trametinib                                                                                       | -0.366 | -0.364 | 0.92   | -0.226 | 0.17   | 0.309 | 0.318 | 0.705 | 0.276 | 0.498 |
| DB02994 | Cacodylic acid                                                                                   | -0.364 | -0.132 | 1.166  | 0.417  | -1.266 | 0.304 | 0.438 | 0.795 | 0.431 | 0.038 |
| DB04715 | IMIDAZOPYRIDAZIN 1                                                                               | -0.364 | 0.65   | -2.307 | -0.673 | -0.469 | 0.326 | 0.804 | 0.002 | 0.142 | 0.247 |
| DB01613 | Erythrityl tetranitrate                                                                          | -0.363 | -0.052 | -0.19  | -0.336 | -0.787 | 0.435 | 0.678 | 0.346 | 0.209 | 0.084 |
| DB01819 | Phosphoenolpyruvate                                                                              | -0.362 | -0.162 | 1.79   | 0.616  | -1.382 | 0.32  | 0.429 | 0.909 | 0.51  | 0.03  |
| DB06744 | ginkgolide-B                                                                                     | -0.362 | -0.169 | 0.025  | 0.208  | -0.547 | 0.34  | 0.448 | 0.406 | 0.499 | 0.186 |
| DB08232 | [5-(5-Amino-1H-pyrrolo[3,2-b]pyridin-2-yl)-6-hydroxy-3'-nitro-3-biphenyl]acetic acid             | -0.362 | -0.131 | 0.96   | 0.068  | -0.944 | 0.31  | 0.445 | 0.773 | 0.279 | 0.09  |
| DB01210 | Levobunolol                                                                                      | -0.361 | 0.41   | -1.908 | 0.357  | -1.453 | 0.323 | 0.6   | 0.01  | 0.524 | 0.05  |

|         |                                                                                                |        |        |        |        |        |       |       |       |       |       |
|---------|------------------------------------------------------------------------------------------------|--------|--------|--------|--------|--------|-------|-------|-------|-------|-------|
| DB01271 | Idursulfase                                                                                    | -0.361 | -0.104 | 0.653  | -0.241 | -0.742 | 0.463 | 0.667 | 0.764 | 0.287 | 0.07  |
| DB01279 | Galsulfase                                                                                     | -0.361 | -0.104 | 0.653  | -0.241 | -0.742 | 0.463 | 0.667 | 0.764 | 0.287 | 0.07  |
| DB08705 | 6-(5-BROMO-2-HYDROXYPHENYL)-2-OXO-4-PHENYL-1,2-DIHYDROPYRIDINE-3-CARBONITRILE                  | -0.361 | 0.008  | -2.405 | 0.824  | -0.112 | 0.305 | 0.485 | 0.001 | 0.576 | 0.403 |
| DB11362 | Selexipag                                                                                      | -0.361 | -0.198 | -0.024 | -0.241 | -0.436 | 0.463 | 0.561 | 0.428 | 0.287 | 0.289 |
| DB02848 | {4-[3-(6,7-Diethoxy-Quinazolin-4-Ylamino)-Phenyl]-Thiazol-2-Yl}-Methanol                       | -0.36  | -0.116 | 0.074  | -0.107 | -0.614 | 0.356 | 0.525 | 0.459 | 0.257 | 0.156 |
| DB08820 | Ivacaftor                                                                                      | -0.36  | 0.248  | 0.809  | 1.101  | -1.821 | 0.317 | 0.691 | 0.713 | 0.728 | 0.001 |
| DB09280 | Lumacaftor                                                                                     | -0.36  | 0.248  | 0.809  | 1.101  | -1.821 | 0.317 | 0.691 | 0.713 | 0.728 | 0.001 |
| DB02320 | 1-N-Acetyl-Beta-D-Glucosamine                                                                  | -0.359 | 0.001  | 0.411  | 0.228  | -1.101 | 0.306 | 0.509 | 0.559 | 0.348 | 0.042 |
| DB03067 | 4-{2,4-Bis[(3-Nitrobenzoyl)Amino]Phenoxy}Phthalic Acid                                         | -0.359 | 0.001  | 0.411  | 0.228  | -1.101 | 0.306 | 0.509 | 0.559 | 0.348 | 0.042 |
| DB04044 | 4-{2-[(3-Nitrobenzoyl)Amino]Phenoxy}Phthalic Acid                                              | -0.359 | 0.001  | 0.411  | 0.228  | -1.101 | 0.306 | 0.509 | 0.559 | 0.348 | 0.042 |
| DB06986 | 2-CHLORO-N-[(1R,2R)-1-HYDROXY-2,3-DIHYDRO-1H-INDEN-2-YL]-6H-THIENO[2,3-B]PYRROLE-5-CARBOXAMIDE | -0.359 | 0.001  | 0.411  | 0.228  | -1.101 | 0.306 | 0.509 | 0.559 | 0.348 | 0.042 |
| DB07807 | (3R,4R,5R)-5-(HYDROXYMETHYL)-1-(3-PHENYLPROPYL)PIPERIDINE-3,4-DIOL                             | -0.359 | 0.001  | 0.411  | 0.228  | -1.101 | 0.306 | 0.509 | 0.559 | 0.348 | 0.042 |
| DB08322 | 2-DEOXY-3,4-BIS-O-[3-(4-HYDROXYPHENYL)PROPANOYL]-L-THREO-PENTARIC ACID                         | -0.359 | 0.001  | 0.411  | 0.228  | -1.101 | 0.306 | 0.509 | 0.559 | 0.348 | 0.042 |
| DB00323 | Tolcapone                                                                                      | -0.356 | 0.297  | 0.74   | 0.041  | -0.64  | 0.297 | 0.695 | 0.701 | 0.291 | 0.151 |
| DB03026 | Phosphoglycolohydroxamic Acid                                                                  | -0.356 | -0.065 | 0.212  | 0.281  | -0.743 | 0.298 | 0.449 | 0.46  | 0.371 | 0.128 |
| DB08872 | Gabapentin enacarbil                                                                           | -0.356 | -0.006 | -0.094 | -0.291 | -0.737 | 0.4   | 0.656 | 0.399 | 0.202 | 0.112 |
| DB00511 | Acetyldigitoxin                                                                                | -0.354 | -0.2   | 0.925  | 0.036  | -0.721 | 0.459 | 0.563 | 0.792 | 0.374 | 0.09  |
| DB01078 | Deslanoside                                                                                    | -0.354 | -0.2   | 0.925  | 0.036  | -0.721 | 0.459 | 0.563 | 0.792 | 0.374 | 0.09  |
| DB01345 | Potassium cation                                                                               | -0.354 | -0.2   | 0.925  | 0.036  | -0.721 | 0.459 | 0.563 | 0.792 | 0.374 | 0.09  |
| DB01430 | Almitrine                                                                                      | -0.354 | -0.2   | 0.925  | 0.036  | -0.721 | 0.459 | 0.563 | 0.792 | 0.374 | 0.09  |
| DB02338 | Nadph Dihydro-Nicotinamide-Adenine-Dinucleotidephosphate                                       | -0.354 | 0.036  | -0.257 | -0.149 | -0.885 | 0.34  | 0.621 | 0.273 | 0.251 | 0.074 |
| DB07476 | N-[4-(AMINOSULFONYL)PHENYL]-2-MERCAPTOBENZAMIDE                                                | -0.353 | -0.043 | 0.044  | -1.337 | -1.068 | 0.347 | 0.549 | 0.444 | 0.027 | 0.039 |
| DB04451 | 4-Methylpiperazin-1-Yl Carbonyl Group                                                          | -0.352 | -0.176 | 0.557  | -0.403 | -0.652 | 0.421 | 0.516 | 0.708 | 0.156 | 0.132 |
| DB07675 | (2S)-2-ETHOXY-3-(4-[2-(10H-PHENOXAZIN-10-YL)ETHOXY]PHENYL)PROPANOIC ACID                       | -0.352 | 0.006  | 1.08   | 1.178  | -1.223 | 0.331 | 0.458 | 0.772 | 0.728 | 0.063 |
| DB07842 | (2S)-2-(4-ethylphenoxy)-3-phenylpropanoic acid                                                 | -0.352 | 0.006  | 1.08   | 1.178  | -1.223 | 0.331 | 0.458 | 0.772 | 0.728 | 0.063 |
| DB08121 | (2S)-2-(biphenyl-4-yloxy)-3-phenylpropanoic acid                                               | -0.352 | 0.006  | 1.08   | 1.178  | -1.223 | 0.331 | 0.458 | 0.772 | 0.728 | 0.063 |
| DB08760 | (2S)-2-(4-chlorophenoxy)-3-phenylpropanoic acid                                                | -0.352 | 0.006  | 1.08   | 1.178  | -1.223 | 0.331 | 0.458 | 0.772 | 0.728 | 0.063 |
| DB09198 | Lobeglitazone                                                                                  | -0.352 | 0.006  | 1.08   | 1.178  | -1.223 | 0.331 | 0.458 | 0.772 | 0.728 | 0.063 |
| DB00847 | Cysteamine                                                                                     | -0.351 | 1.251  | 1.463  | 0.014  | -1.647 | 0.303 | 0.883 | 0.882 | 0.362 | 0.026 |
| DB02073 | Biliverdine IX Alpha                                                                           | -0.351 | -0.282 | 0.795  | -0.19  | -0.469 | 0.396 | 0.436 | 0.758 | 0.214 | 0.24  |
| DB07420 | (1R)-4-(3-phenoxyphenyl)-1-phosphonobutane-1-sulfonic acid                                     | -0.351 | 0.025  | 1.207  | -0.34  | -0.963 | 0.395 | 0.671 | 0.863 | 0.166 | 0.039 |
| DB08358 | 2-(2-QUINOLIN-3-YLPYRIDIN-4-YL)-1,5,6,7-TETRAHYDRO-4H-PYRROLO[3,2-C]PYRIDIN-4-ONE              | -0.351 | -1.101 | 1.418  | -1.244 | 0.089  | 0.219 | 0.086 | 0.952 | 0.075 | 0.431 |
| DB00152 | Thiamine                                                                                       | -0.348 | -0.483 | -0.661 | -0.532 | 0.478  | 0.224 | 0.203 | 0.18  | 0.225 | 0.637 |



|         |                                                                                |        |        |        |        |        |       |       |       |       |       |
|---------|--------------------------------------------------------------------------------|--------|--------|--------|--------|--------|-------|-------|-------|-------|-------|
| DB03374 | 3,5-Diiodotyrosine                                                             | -0.347 | -0.34  | 1.355  | -0.124 | -0.685 | 0.224 | 0.266 | 0.892 | 0.334 | 0.134 |
| DB09026 | Aliskiren                                                                      | -0.347 | -0.153 | 0.679  | -0.221 | -0.48  | 0.354 | 0.463 | 0.709 | 0.192 | 0.233 |
| DB01536 | Androstenedione                                                                | -0.344 | -0.195 | 0.822  | 1.063  | -1.354 | 0.332 | 0.36  | 0.713 | 0.788 | 0.069 |
| DB04960 | Tipifarnib                                                                     | -0.344 | 0.13   | 0.971  | 0.109  | -1.118 | 0.362 | 0.683 | 0.802 | 0.36  | 0.014 |
| DB05829 | Parathyroid hormone                                                            | -0.343 | -0.256 | 0.712  | -0.059 | -0.609 | 0.372 | 0.42  | 0.74  | 0.315 | 0.164 |
| DB06285 | Teriparatide                                                                   | -0.343 | -0.256 | 0.712  | -0.059 | -0.609 | 0.372 | 0.42  | 0.74  | 0.315 | 0.164 |
| DB00217 | Bethanidine                                                                    | -0.342 | 0.425  | -0.081 | 0.401  | -1.494 | 0.338 | 0.611 | 0.313 | 0.544 | 0.041 |
| DB09552 | Thonzonium                                                                     | -0.342 | -0.237 | 0.556  | -0.363 | -0.559 | 0.488 | 0.562 | 0.73  | 0.211 | 0.203 |
| DB00888 | Mechlorethamine                                                                | -0.341 | -0.122 | 0.073  | -1.002 | -0.406 | 0.395 | 0.571 | 0.486 | 0.041 | 0.281 |
| DB00951 | Isoniazid                                                                      | -0.341 | 0.051  | 1.084  | -0.005 | -0.89  | 0.415 | 0.686 | 0.836 | 0.407 | 0.06  |
| DB07244 | 5-{4-[(3,5-DIFLUOROBENZYL)AMINO]PHENYL}-6-ETHYLPYRIMIDINE-2,4-DIAMINE          | -0.34  | -0.322 | 1.751  | 0.089  | -0.755 | 0.332 | 0.33  | 0.922 | 0.35  | 0.101 |
| DB07632 | 5-(2-chlorophenyl)-1,3,4-thiadiazole-2-sulfonamide                             | -0.34  | 0.379  | 0.39   | -2.38  | -1.25  | 0.322 | 0.62  | 0.534 | 0.007 | 0.057 |
| DB08439 | Parecoxib                                                                      | -0.34  | 0.022  | 2.15   | -1.716 | -0.722 | 0.331 | 0.487 | 0.947 | 0.039 | 0.156 |
| DB01030 | Topotecan                                                                      | -0.335 | -0.919 | 0.215  | -1.196 | 0.676  | 0.254 | 0.098 | 0.482 | 0.078 | 0.716 |
| DB02126 | 4-Carboxycinnamic Acid                                                         | -0.334 | 0.75   | 0.646  | -0.633 | -1.199 | 0.317 | 0.818 | 0.607 | 0.147 | 0.059 |
| DB07427 | 2-[(2-methoxy-5-methylphenoxy)methyl]pyridine                                  | -0.334 | 0.75   | 0.646  | -0.633 | -1.199 | 0.317 | 0.818 | 0.607 | 0.147 | 0.059 |
| DB07428 | 4-[(5-methoxy-2-methylphenoxy)methyl]pyridine                                  | -0.334 | 0.75   | 0.646  | -0.633 | -1.199 | 0.317 | 0.818 | 0.607 | 0.147 | 0.059 |
| DB07645 | SEBACIC ACID                                                                   | -0.334 | 0.75   | 0.646  | -0.633 | -1.199 | 0.317 | 0.818 | 0.607 | 0.147 | 0.059 |
| DB08077 | 2-[4-[(3,5-DICHLOROPHENYL)AMINO]CARBONYL]AMINO)PHENOXY]-2-METHYLPROPANOIC ACID | -0.334 | 0.75   | 0.646  | -0.633 | -1.199 | 0.317 | 0.818 | 0.607 | 0.147 | 0.059 |
| DB08262 | 2,6-dicarboxynaphthalene                                                       | -0.334 | 0.75   | 0.646  | -0.633 | -1.199 | 0.317 | 0.818 | 0.607 | 0.147 | 0.059 |
| DB08486 | Efaproxiral                                                                    | -0.334 | 0.75   | 0.646  | -0.633 | -1.199 | 0.317 | 0.818 | 0.607 | 0.147 | 0.059 |
| DB08632 | 1,3,5-BENZENETRICARBOXYLIC ACID                                                | -0.334 | 0.75   | 0.646  | -0.633 | -1.199 | 0.317 | 0.818 | 0.607 | 0.147 | 0.059 |
| DB00569 | Fondaparinux                                                                   | -0.333 | -0.097 | 0.777  | -0.322 | -0.747 | 0.402 | 0.582 | 0.762 | 0.166 | 0.107 |
| DB01225 | Enoxaparin                                                                     | -0.333 | -0.097 | 0.777  | -0.322 | -0.747 | 0.402 | 0.582 | 0.762 | 0.166 | 0.107 |
| DB01460 | Diethyltryptamine                                                              | -0.333 | -0.144 | 0.448  | -0.426 | -0.651 | 0.459 | 0.581 | 0.671 | 0.168 | 0.135 |
| DB02692 |                                                                                | -0.333 | 0.768  | 1.551  | -0.263 | -2.981 | 0.326 | 0.73  | 0.908 | 0.315 | 0     |
| DB04941 | Crofelemer                                                                     | -0.331 | 0.442  | 0.414  | 1.006  | -1.914 | 0.337 | 0.717 | 0.481 | 0.729 | 0.005 |
| DB01146 | Diphenylpyraline                                                               | -0.33  | -0.089 | -0.044 | -0.505 | -0.853 | 0.401 | 0.599 | 0.424 | 0.147 | 0.058 |
| DB03948 | 6-Chloropurine Riboside, 5'-Monophosphate                                      | -0.329 | 0.105  | -2.365 | -0.438 | 0.248  | 0.348 | 0.545 | 0.004 | 0.207 | 0.526 |
| DB07608 | N-(5-[(2S)-4-amino-2-(3-chlorophenyl)butanoyl]amino)-1H-indazol-3-yl)benzamide | -0.328 | 0.004  | 0.581  | 0.064  | -0.951 | 0.441 | 0.656 | 0.661 | 0.366 | 0.042 |
| DB00495 | Zidovudine                                                                     | -0.327 | -0.86  | -1.217 | -0.998 | 1.03   | 0.323 | 0.145 | 0.053 | 0.131 | 0.799 |
| DB01213 | Fomepizole                                                                     | -0.327 | 0.014  | 1.052  | 0.06   | -0.795 | 0.378 | 0.614 | 0.827 | 0.445 | 0.092 |
| DB04828 | Zomepirac                                                                      | -0.327 | 0.056  | 1.84   | -0.868 | -0.812 | 0.359 | 0.604 | 0.934 | 0.116 | 0.085 |
| DB02300 | Calcipotriol                                                                   | -0.326 | 0.572  | 1.037  | -0.198 | -1.084 | 0.328 | 0.697 | 0.753 | 0.288 | 0.095 |
| DB02639 | 4-methylumbelliferyl ??-D-glucoside                                            | -0.326 | 0.01   | 1.267  | -1.34  | -0.734 | 0.341 | 0.571 | 0.85  | 0.04  | 0.105 |
| DB03046 | 7-Methoxy-8-[1-(Methylsulfonyl)-1h-Pyrazol-4-Yl]Naphthalene-2-Carboximidamide  | -0.326 | 0.189  | -0.281 | -0.178 | -0.628 | 0.336 | 0.527 | 0.093 | 0.248 | 0.185 |
| DB06816 | Pyrvinium                                                                      | -0.326 | -0.24  | -1.393 | -1.371 | 0.402  | 0.243 | 0.297 | 0.054 | 0.059 | 0.589 |
| DB05389 | Tetrachlorodecaoxide                                                           | -0.321 | -0.138 | 0.494  | -0.286 | -0.725 | 0.446 | 0.597 | 0.684 | 0.216 | 0.089 |
| DB02633 | Cibacron Blue                                                                  | -0.32  | 0.546  | 0.602  | -2.045 | -1.775 | 0.338 | 0.776 | 0.594 | 0.009 | 0.009 |
| DB00687 | Fludrocortisone                                                                | -0.319 | 0.034  | -1.333 | -0.912 | -0.314 | 0.24  | 0.419 | 0.066 | 0.115 | 0.25  |
| DB01365 | Mephentermine                                                                  | -0.319 | 0.186  | 0.465  | 0.458  | -1.964 | 0.337 | 0.52  | 0.56  | 0.575 | 0.018 |
| DB04581 | 1-benzylimidazole                                                              | -0.319 | 0.267  | 1.626  | 0.9    | -0.73  | 0.416 | 0.778 | 0.911 | 0.81  | 0.103 |
| DB00706 | Tamsulosin                                                                     | -0.317 | -0.796 | 3.513  | 0.904  | -1.093 | 0.333 | 0.179 | 1     | 0.644 | 0.103 |
| DB03615 | Ribostamycin                                                                   | -0.317 | -0.062 | 0.296  | -1.105 | -0.919 | 0.443 | 0.619 | 0.542 | 0.033 | 0.036 |

|         |                                                                                                              |        |        |        |        |        |       |       |       |       |       |
|---------|--------------------------------------------------------------------------------------------------------------|--------|--------|--------|--------|--------|-------|-------|-------|-------|-------|
| DB08513 | [4-({5-(AMINOCARBONYL)-4-[(3-METHYLPHENYL)AMINO]PYRIMIDIN-2-YL)AMINO}PHENYL]ACETIC ACID                      | -0.317 | -0.587 | 0.763  | -0.165 | -0.105 | 0.237 | 0.173 | 0.469 | 0.332 | 0.345 |
| DB06663 | Pasireotide                                                                                                  | -0.316 | -0.029 | 0.265  | -0.205 | -0.802 | 0.381 | 0.537 | 0.531 | 0.224 | 0.094 |
| DB06959 | (2S)-1-(3H-Indol-3-yl)-3-[[5-(6-isoquinolinyl)-3-pyridinyl]oxy]-2-propanamine                                | -0.316 | -0.231 | 1.099  | -0.207 | -0.924 | 0.239 | 0.308 | 0.803 | 0.297 | 0.102 |
| DB07204 | (1S)-1-(1H-INDOL-3-YLMETHYL)-2-(2-PYRIDIN-4-YL-[1,7]NAPHTYRIDIN-5-YLOXY)-EHYLAMINE                           | -0.316 | -0.231 | 1.099  | -0.207 | -0.924 | 0.239 | 0.308 | 0.803 | 0.297 | 0.102 |
| DB07583 | (4R,2S)-5'-(4-(4-CHLOROBENZYLOXY)PYRROLIDIN-2-YLMETHANESULFONYL)ISOQUINOLINE                                 | -0.316 | -0.231 | 1.099  | -0.207 | -0.924 | 0.239 | 0.308 | 0.803 | 0.297 | 0.102 |
| DB07854 | N-METHYL-1-[4-(9H-PURIN-6-YL)PHENYL]METHANAMINE                                                              | -0.316 | -0.231 | 1.099  | -0.207 | -0.924 | 0.239 | 0.308 | 0.803 | 0.297 | 0.102 |
| DB07855 | (S)-1-PHENYL-1-[4-(9H-PURIN-6-YL)PHENYL]METHANAMINE                                                          | -0.316 | -0.231 | 1.099  | -0.207 | -0.924 | 0.239 | 0.308 | 0.803 | 0.297 | 0.102 |
| DB07857 | (2R)-2-(4-chlorophenyl)-2-[4-(1H-pyrazol-4-yl)phenyl]ethanamine                                              | -0.316 | -0.231 | 1.099  | -0.207 | -0.924 | 0.239 | 0.308 | 0.803 | 0.297 | 0.102 |
| DB07860 | (2R)-2-(4-CHLOROPHENYL)-2-PHENYLETHANAMINE                                                                   | -0.316 | -0.231 | 1.099  | -0.207 | -0.924 | 0.239 | 0.308 | 0.803 | 0.297 | 0.102 |
| DB07996 | 5-(2-methylpiperazine-1-sulfonyl)isoquinoline                                                                | -0.316 | -0.231 | 1.099  | -0.207 | -0.924 | 0.239 | 0.308 | 0.803 | 0.297 | 0.102 |
| DB07997 | N-[2-(METHYLAMINO)ETHYL]-5-ISOQUINOLINESULFONAMIDE                                                           | -0.316 | -0.231 | 1.099  | -0.207 | -0.924 | 0.239 | 0.308 | 0.803 | 0.297 | 0.102 |
| DB08113 | 3-pyridin-4-yl-1H-indazole                                                                                   | -0.316 | -0.231 | 1.099  | -0.207 | -0.924 | 0.239 | 0.308 | 0.803 | 0.297 | 0.102 |
| DB08114 | 5-benzyl-1,3-thiazol-2-amine                                                                                 | -0.316 | -0.231 | 1.099  | -0.207 | -0.924 | 0.239 | 0.308 | 0.803 | 0.297 | 0.102 |
| DB01628 | Etoricoxib                                                                                                   | -0.315 | -0.255 | 0.76   | -0.481 | -0.813 | 0.267 | 0.279 | 0.614 | 0.223 | 0.138 |
| DB00347 | Trimethadione                                                                                                | -0.313 | -0.225 | -0.726 | -0.781 | -0.433 | 0.294 | 0.31  | 0.245 | 0.246 | 0.266 |
| DB00593 | Ethosuximide                                                                                                 | -0.313 | -0.225 | -0.726 | -0.781 | -0.433 | 0.294 | 0.31  | 0.245 | 0.246 | 0.266 |
| DB05246 | Methsuximide                                                                                                 | -0.313 | -0.225 | -0.726 | -0.781 | -0.433 | 0.294 | 0.31  | 0.245 | 0.246 | 0.266 |
| DB01255 | Lisdexamfetamine                                                                                             | -0.311 | -0.232 | 0.287  | -0.276 | -1.106 | 0.365 | 0.414 | 0.559 | 0.182 | 0.034 |
| DB08065 | 2-(1H-pyrazol-3-yl)-1H-benzimidazole                                                                         | -0.311 | -0.257 | -0.703 | -0.614 | -0.421 | 0.236 | 0.297 | 0.116 | 0.186 | 0.223 |
| DB00651 | Dyphylline                                                                                                   | -0.31  | 0.056  | 0.076  | -0.621 | -0.227 | 0.342 | 0.464 | 0.394 | 0.145 | 0.318 |
| DB02076 | 6-phospho-D-gluconic acid                                                                                    | -0.31  | -0.325 | 1.069  | 0.092  | -0.465 | 0.389 | 0.352 | 0.818 | 0.315 | 0.241 |
| DB04861 | Nebivolol                                                                                                    | -0.309 | 0.347  | -1.716 | 0.543  | -1.185 | 0.347 | 0.578 | 0.015 | 0.593 | 0.073 |
| DB03575 | Phencyclidine                                                                                                | -0.307 | 0.054  | 0.414  | -0.216 | -1.017 | 0.351 | 0.592 | 0.572 | 0.209 | 0.056 |
| DB07242 | (4R)-7,8-dichloro-1',9-dimethyl-1-oxo-1,2,4,9-tetrahydrospiro[beta-carboline-3,4'-piperidine]-4-carbonitrile | -0.307 | 0.405  | -2.315 | 0.728  | -0.947 | 0.344 | 0.714 | 0.003 | 0.548 | 0.104 |
| DB01165 | Ofloxacin                                                                                                    | -0.305 | 0.045  | 0.117  | -1.165 | -0.135 | 0.335 | 0.467 | 0.415 | 0.083 | 0.371 |
| DB01472 | 4-Methoxyamphetamine                                                                                         | -0.305 | 0.076  | 1.26   | -0.417 | -1.023 | 0.376 | 0.657 | 0.873 | 0.159 | 0.038 |
| DB01839 | Propylene glycol                                                                                             | -0.302 | -0.076 | 1.005  | 0.002  | -0.86  | 0.386 | 0.522 | 0.788 | 0.29  | 0.079 |
| DB00991 | Oxaprozin                                                                                                    | -0.301 | 0.022  | 2.19   | -1.456 | -1.017 | 0.367 | 0.583 | 0.958 | 0.021 | 0.056 |
| DB01364 | Ephedrine                                                                                                    | -0.301 | 0.385  | -1.264 | 0.306  | -1.125 | 0.351 | 0.613 | 0.066 | 0.509 | 0.086 |
| DB04813 | Bithionol                                                                                                    | -0.301 | 0.408  | 0.789  | 0.373  | -1.209 | 0.27  | 0.62  | 0.723 | 0.59  | 0.092 |
| DB05105 | Pleconaril                                                                                                   | -0.301 | 0      | 0.565  | -0.087 | -1.187 | 0.371 | 0.548 | 0.626 | 0.271 | 0.035 |
| DB01050 | Ibuprofen                                                                                                    | -0.299 | -0.582 | 2.485  | 1.328  | -0.002 | 0.345 | 0.238 | 0.997 | 0.886 | 0.42  |
| DB01404 | Ginseng                                                                                                      | -0.298 | 0.269  | 1.113  | 0.35   | -1.488 | 0.333 | 0.628 | 0.792 | 0.388 | 0.029 |
| DB00276 | Amsacrine                                                                                                    | -0.295 | -0.455 | -0.833 | -1.174 | 0.688  | 0.272 | 0.245 | 0.143 | 0.087 | 0.724 |
| DB00686 | Pentosan Polysulfate                                                                                         | -0.295 | 0.25   | 0.973  | 0.169  | -1.47  | 0.338 | 0.663 | 0.75  | 0.351 | 0.019 |
| DB00754 | Ethotoin                                                                                                     | -0.295 | -0.055 | 1.33   | 0.169  | -1.041 | 0.359 | 0.497 | 0.843 | 0.336 | 0.057 |
| DB03754 | Tromethamine                                                                                                 | -0.295 | -0.132 | -0.714 | 0.759  | 0.129  | 0.342 | 0.39  | 0.072 | 0.584 | 0.457 |
| DB13169 | Nandrolone                                                                                                   | -0.295 | -0.474 | -1.101 | -0.342 | -0.033 | 0.236 | 0.226 | 0.069 | 0.264 | 0.37  |
| DB04743 | Nimesulide                                                                                                   | -0.294 | -0.399 | 1.447  | -0.318 | 0.239  | 0.34  | 0.3   | 0.87  | 0.273 | 0.492 |
| DB06736 | Aceclofenac                                                                                                  | -0.294 | -0.768 | 1.818  | -0.201 | 0.082  | 0.236 | 0.158 | 0.98  | 0.33  | 0.44  |

|         |                                                                                                                             |        |        |        |        |        |       |       |       |       |       |
|---------|-----------------------------------------------------------------------------------------------------------------------------|--------|--------|--------|--------|--------|-------|-------|-------|-------|-------|
| DB09526 | Hydroquinone                                                                                                                | -0.294 | 0.296  | -0.394 | -0.972 | -0.322 | 0.277 | 0.545 | 0.25  | 0.124 | 0.288 |
| DB00198 | Oseltamivir                                                                                                                 | -0.289 | -0.076 | 1.407  | -0.246 | -0.772 | 0.387 | 0.542 | 0.869 | 0.217 | 0.087 |
| DB00790 | Perindopril                                                                                                                 | -0.287 | -0.144 | 0.735  | -0.191 | -0.478 | 0.441 | 0.507 | 0.734 | 0.224 | 0.237 |
| DB06836 | N-(5-{4-Chloro-3-[(2-hydroxyethyl)sulfamoyl]phenyl}-4-methyl-1,3-thiazol-2-yl)acetamide                                     | -0.287 | 0.434  | 0.433  | 0.363  | -1.18  | 0.349 | 0.718 | 0.556 | 0.383 | 0.039 |
| DB00223 | Diflorasone                                                                                                                 | -0.286 | 0.009  | -1.495 | -1.118 | 0.082  | 0.254 | 0.404 | 0.054 | 0.082 | 0.443 |
| DB00591 | Fluocinolone acetonide                                                                                                      | -0.286 | 0.009  | -1.495 | -1.118 | 0.082  | 0.254 | 0.404 | 0.054 | 0.082 | 0.443 |
| DB00846 | Flurandrenolide                                                                                                             | -0.286 | 0.009  | -1.495 | -1.118 | 0.082  | 0.254 | 0.404 | 0.054 | 0.082 | 0.443 |
| DB01260 | Desonide                                                                                                                    | -0.286 | 0.009  | -1.495 | -1.118 | 0.082  | 0.254 | 0.404 | 0.054 | 0.082 | 0.443 |
| DB01410 | Ciclesonide                                                                                                                 | -0.286 | 0.009  | -1.495 | -1.118 | 0.082  | 0.254 | 0.404 | 0.054 | 0.082 | 0.443 |
| DB00745 | Modafinil                                                                                                                   | -0.285 | -0.134 | 1.895  | 0.599  | -1.264 | 0.356 | 0.415 | 0.931 | 0.608 | 0.045 |
| DB01003 | Cromoglicic acid                                                                                                            | -0.285 | 0.051  | 1.319  | -0.166 | -0.708 | 0.406 | 0.589 | 0.857 | 0.22  | 0.136 |
| DB06413 | Armodafinil                                                                                                                 | -0.285 | -0.134 | 1.895  | 0.599  | -1.264 | 0.356 | 0.415 | 0.931 | 0.608 | 0.045 |
| DB06605 | Apixaban                                                                                                                    | -0.285 | -0.04  | 0.165  | 0.077  | -0.577 | 0.387 | 0.543 | 0.483 | 0.314 | 0.188 |
| DB07277 | 2-(5-CHLORO-2-THIENYL)-N-((3S)-1-[(1S)-1-METHYL-2-MORPHOLIN-4-YL-2-OXOETHYL]-2-OXOPYRROLIDIN-3-YL)ETHANESULFONAMIDE         | -0.285 | -0.04  | 0.165  | 0.077  | -0.577 | 0.387 | 0.543 | 0.483 | 0.314 | 0.188 |
| DB07278 | 2-(5-CHLORO-2-THIENYL)-N-((3S)-1-[(1S)-1-METHYL-2-MORPHOLIN-4-YL-2-OXOETHYL]-2-OXOPYRROLIDIN-3-YL)ETHANESULFONAMIDE         | -0.285 | -0.04  | 0.165  | 0.077  | -0.577 | 0.387 | 0.543 | 0.483 | 0.314 | 0.188 |
| DB07629 | N-((1R,2S)-2-(5-CHLORO-1H-INDOLE-2-CARBOXAMIDO)CYCLOHEXYL)-5-METHYL-4,5,6,7-TETRAHYDROTHIAZOLO[5,4-C]PYRIDINE-2-CARBOXAMIDE | -0.285 | -0.04  | 0.165  | 0.077  | -0.577 | 0.387 | 0.543 | 0.483 | 0.314 | 0.188 |
| DB07974 | 1-{2-[(4-CHLOROPHENYL)AMINO]-2-OXOETHYL}-N-(1-ISOPROPYLPYPERIDIN-4-YL)-1H-INDOLE-2-CARBOXAMIDE                              | -0.285 | -0.04  | 0.165  | 0.077  | -0.577 | 0.387 | 0.543 | 0.483 | 0.314 | 0.188 |
| DB08174 | 5-CHLORO-N-((1R,2S)-2-(4-(2-OXOPYRIDIN-1(2H)-YL)BENZAMIDO)CYCLOPENTYL)THIOPHENE-2-CARBOXAMIDE                               | -0.285 | -0.04  | 0.165  | 0.077  | -0.577 | 0.387 | 0.543 | 0.483 | 0.314 | 0.188 |
| DB11166 | Antithrombin Alfa                                                                                                           | -0.285 | -0.04  | 0.165  | 0.077  | -0.577 | 0.387 | 0.543 | 0.483 | 0.314 | 0.188 |
| DB01013 | Clobetasol propionate                                                                                                       | -0.284 | 0.002  | -1.244 | -0.922 | 0.023  | 0.289 | 0.404 | 0.075 | 0.116 | 0.417 |
| DB01047 | Fluocinonide                                                                                                                | -0.283 | 0.081  | -1.38  | -1.393 | 0.153  | 0.246 | 0.448 | 0.062 | 0.048 | 0.459 |
| DB04209 | Dequalinium                                                                                                                 | -0.282 | -0.585 | -1.447 | -0.084 | 0.42   | 0.255 | 0.16  | 0.057 | 0.404 | 0.614 |
| DB09131 | Cupric Chloride                                                                                                             | -0.282 | -0.164 | 1.522  | -0.259 | -0.558 | 0.479 | 0.511 | 0.893 | 0.2   | 0.197 |
| DB06716 | Fospropofol                                                                                                                 | -0.281 | -0.198 | 0.719  | 0.749  | -0.602 | 0.422 | 0.461 | 0.759 | 0.778 | 0.169 |
| DB00480 | Lenalidomide                                                                                                                | -0.277 | -0.625 | -1.623 | 0.611  | -0.189 | 0.335 | 0.23  | 0.027 | 0.588 | 0.355 |
| DB00973 | Ezetimibe                                                                                                                   | -0.277 | -0.094 | -0.044 | 0.399  | -0.707 | 0.364 | 0.446 | 0.356 | 0.528 | 0.152 |
| DB03152 | B-2-Octylglucoside                                                                                                          | -0.276 | -0.095 | 0.619  | -0.292 | -0.587 | 0.496 | 0.573 | 0.727 | 0.222 | 0.178 |
| DB04931 | Afamelanotide                                                                                                               | -0.276 | 0.406  | 0.732  | -0.355 | -0.125 | 0.429 | 0.785 | 0.731 | 0.175 | 0.467 |
| DB00798 | Gentamicin                                                                                                                  | -0.275 | 0.006  | 0.414  | 0.444  | -0.857 | 0.378 | 0.532 | 0.552 | 0.441 | 0.1   |
| DB09517 | Sodium ferric gluconate complex                                                                                             | -0.275 | 0.637  | 1.043  | 0.08   | -1.07  | 0.347 | 0.684 | 0.756 | 0.353 | 0.12  |
| DB00054 | Abciximab                                                                                                                   | -0.271 | -0.339 | 0.217  | 0.545  | 0.786  | 0.35  | 0.308 | 0.422 | 0.645 | 0.731 |
| DB01158 | Bretylum                                                                                                                    | -0.271 | 0.474  | -1.632 | 0.708  | -1.013 | 0.351 | 0.631 | 0.022 | 0.644 | 0.099 |
| DB07288 | N-(4-chlorophenyl)-2-[(pyridin-4-ylmethyl)amino]benzamide                                                                   | -0.271 | 0.217  | -0.217 | -0.218 | -0.902 | 0.25  | 0.528 | 0.248 | 0.343 | 0.097 |
| DB06218 | Lacosamide                                                                                                                  | -0.27  | 0.607  | 2.198  | -0.902 | -0.948 | 0.36  | 0.688 | 0.972 | 0.137 | 0.128 |
| DB04879 | Vatalanib                                                                                                                   | -0.269 | 0.138  | -0.071 | 0.347  | -0.949 | 0.27  | 0.513 | 0.352 | 0.562 | 0.11  |
| DB00171 | ATP                                                                                                                         | -0.268 | -1.06  | 0.823  | 0.838  | 0.279  | 0.299 | 0.112 | 0.748 | 0.796 | 0.565 |
| DB02398 | 6-[N-(4-(Aminomethyl)Phenyl)Carbamyl]-2-Naphthalenecarboxamidine                                                            | -0.267 | -0.058 | 0.974  | 0.102  | -0.279 | 0.403 | 0.464 | 0.76  | 0.311 | 0.322 |
| DB03535 | Z-Pro-Prolinal                                                                                                              | -0.267 | 0.029  | 0.007  | -0.322 | -0.554 | 0.477 | 0.664 | 0.414 | 0.166 | 0.198 |

|         |                                                                                |        |        |        |        |        |       |       |       |       |       |
|---------|--------------------------------------------------------------------------------|--------|--------|--------|--------|--------|-------|-------|-------|-------|-------|
| DB06925 | 3-(2-AMINOQUINAZOLIN-6-YL)-4-METHYL-N-[3-(TRIFLUOROMETHYL)PHENYL]BENZAMIDE     | -0.267 | 0.64   | 0.015  | 0.078  | -1.221 | 0.36  | 0.707 | 0.172 | 0.398 | 0.068 |
| DB00559 | Bosentan                                                                       | -0.264 | -0.482 | 1.49   | 0.679  | -0.753 | 0.353 | 0.264 | 0.861 | 0.495 | 0.161 |
| DB01154 | Thiamylal                                                                      | -0.264 | 0.039  | 1.962  | 0.286  | -0.921 | 0.442 | 0.633 | 0.934 | 0.574 | 0.05  |
| DB03345 | Mercaptoethanol                                                                | -0.264 | -0.225 | 0.188  | 0.284  | -0.343 | 0.4   | 0.394 | 0.455 | 0.356 | 0.29  |
| DB01765 | (5-Oxo-5,6-Dihydro-Indolo[1,2-a]Quinazolin-7-Yl)-Acetic Acid                   | -0.263 | -0.691 | -1.036 | -0.717 | -0.595 | 0.254 | 0.177 | 0.07  | 0.159 | 0.157 |
| DB04066 | para-Coumaric Acid                                                             | -0.263 | -0.142 | 0.217  | 0.202  | -1.128 | 0.314 | 0.339 | 0.476 | 0.5   | 0.089 |
| DB01067 | Glipizide                                                                      | -0.261 | 0.337  | 1.185  | 1.569  | -1.198 | 0.348 | 0.6   | 0.804 | 0.908 | 0.067 |
| DB00032 | Menotropins                                                                    | -0.26  | 0.107  | -0.057 | -0.202 | -0.701 | 0.449 | 0.699 | 0.387 | 0.233 | 0.116 |
| DB00097 | Choriogonadotropin alfa                                                        | -0.26  | 0.107  | -0.057 | -0.202 | -0.701 | 0.449 | 0.699 | 0.387 | 0.233 | 0.116 |
| DB05039 | Indacaterol                                                                    | -0.26  | 0.264  | 0.13   | 0.708  | -1.329 | 0.363 | 0.544 | 0.254 | 0.658 | 0.063 |
| DB01328 | Cefonicid                                                                      | -0.259 | 0.338  | 0.074  | 0.346  | -0.994 | 0.353 | 0.628 | 0.36  | 0.398 | 0.089 |
| DB04214 | 4-Nitrophenyl Phosphate                                                        | -0.259 | 0.157  | 1.967  | -0.8   | -1.327 | 0.368 | 0.528 | 0.934 | 0.114 | 0.061 |
| DB01148 | Flavoxate                                                                      | -0.255 | 0.01   | 0.398  | -0.277 | -0.73  | 0.487 | 0.64  | 0.626 | 0.186 | 0.103 |
| DB04001 | 6-(Oxalyl-Amino)-1h-Indole-5-Carboxylic Acid                                   | -0.254 | 0.268  | -0.178 | -0.271 | -0.704 | 0.376 | 0.638 | 0.12  | 0.253 | 0.149 |
| DB01138 | Sulfinpyrazone                                                                 | -0.253 | -0.411 | 2.722  | -0.55  | -0.445 | 0.363 | 0.294 | 0.985 | 0.165 | 0.257 |
| DB04894 | Vapreotide                                                                     | -0.253 | -0.015 | -0.083 | -0.031 | -0.557 | 0.415 | 0.541 | 0.353 | 0.274 | 0.182 |
| DB04306 | 5-[(4-Methylphenyl)Sulfanyl]-2,4-Quinazolinodiamine                            | -0.252 | 0.61   | 0.363  | 1.027  | -1.806 | 0.376 | 0.742 | 0.502 | 0.796 | 0.016 |
| DB07821 | (1R)-1,2,2-trimethylpropyl (R)-methylphosphinate                               | -0.252 | -0.136 | 0.34   | -0.197 | -0.446 | 0.458 | 0.54  | 0.575 | 0.229 | 0.253 |
| DB01397 | Magnesium salicylate                                                           | -0.25  | 0.416  | 2.113  | -2.279 | -1.576 | 0.352 | 0.627 | 0.951 | 0.01  | 0.022 |
| DB01398 |                                                                                | -0.25  | 0.416  | 2.113  | -2.279 | -1.576 | 0.352 | 0.627 | 0.951 | 0.01  | 0.022 |
| DB01892 | Hyperforin                                                                     | -0.25  | -0.112 | 2.222  | -0.691 | -0.779 | 0.367 | 0.426 | 0.961 | 0.134 | 0.146 |
| DB07876 | (S)-2-METHYL-1-[(4-METHYL-5-ISOQUINOLINE)SULFONYL]-HOMOPIPERAZINE              | -0.25  | -0.536 | 0.889  | -0.849 | -0.752 | 0.258 | 0.197 | 0.605 | 0.137 | 0.13  |
| DB07557 | (5BETA)-PREGNANE-3,20-DIONE                                                    | -0.249 | 0.487  | 0.943  | -0.225 | -0.964 | 0.365 | 0.63  | 0.722 | 0.331 | 0.113 |
| DB00912 | Repaglinide                                                                    | -0.248 | 0.24   | 1.344  | 1.857  | -1.265 | 0.356 | 0.572 | 0.851 | 0.962 | 0.053 |
| DB08868 | Fingolimod                                                                     | -0.247 | -0.373 | 0.568  | 0.171  | 0.033  | 0.252 | 0.233 | 0.538 | 0.46  | 0.389 |
| DB03338 | Heptyl-Beta-D-Glucopyranoside                                                  | -0.244 | 0.191  | 1.614  | 0.459  | -0.914 | 0.395 | 0.603 | 0.905 | 0.421 | 0.098 |
| DB01767 | Hemi-Babim                                                                     | -0.242 | -0.526 | 0.512  | 0.614  | 0.124  | 0.386 | 0.24  | 0.562 | 0.463 | 0.441 |
| DB07234 | 3-[(1R)-1-phenylethyl]amino)-4-(pyridin-4-ylamino)cyclobut-3-ene-1,2-dione     | -0.242 | 0.206  | 0.326  | -1.893 | -0.261 | 0.273 | 0.512 | 0.513 | 0.017 | 0.301 |
| DB00071 | Insulin Pork                                                                   | -0.239 | -0.864 | -1.277 | 0.788  | 1.271  | 0.352 | 0.145 | 0.072 | 0.731 | 0.877 |
| DB01202 | Levetiracetam                                                                  | -0.238 | 0.059  | 0.467  | -0.455 | -0.899 | 0.468 | 0.613 | 0.628 | 0.162 | 0.079 |
| DB01421 | Paromomycin                                                                    | -0.238 | -0.1   | 1.184  | 0.535  | -0.417 | 0.525 | 0.594 | 0.861 | 0.582 | 0.282 |
| DB03856 | L-Eflornithine                                                                 | -0.238 | -0.1   | 1.184  | 0.535  | -0.417 | 0.525 | 0.594 | 0.861 | 0.582 | 0.282 |
| DB04816 | Dantron                                                                        | -0.238 | -0.1   | 1.184  | 0.535  | -0.417 | 0.525 | 0.594 | 0.861 | 0.582 | 0.282 |
| DB08972 | Flumequine                                                                     | -0.238 | -0.1   | 1.184  | 0.535  | -0.417 | 0.525 | 0.594 | 0.861 | 0.582 | 0.282 |
| DB02116 | Olomoucine                                                                     | -0.237 | 0.355  | -0.58  | -0.925 | -0.415 | 0.283 | 0.573 | 0.192 | 0.121 | 0.237 |
| DB00359 | Sulfadiazine                                                                   | -0.236 | -0.312 | 0.312  | 0.15   | -0.654 | 0.281 | 0.287 | 0.465 | 0.473 | 0.16  |
| DB06831 | 2-((9H-PURIN-6-YLTHIO)METHYL)-5-CHLORO-3-(2-METHOXYPHENYL)QUINAZOLIN-4(3H)-ONE | -0.236 | 0.054  | 0.133  | -0.023 | -0.597 | 0.444 | 0.616 | 0.462 | 0.286 | 0.177 |
| DB08142 | AT-7519                                                                        | -0.236 | -0.544 | -0.726 | -0.195 | 0.332  | 0.329 | 0.225 | 0.193 | 0.36  | 0.556 |
| DB00249 | Idoxuridine                                                                    | -0.234 | -0.397 | 0.672  | 0.704  | 0.053  | 0.444 | 0.294 | 0.663 | 0.656 | 0.575 |
| DB01265 | Telbivudine                                                                    | -0.234 | -0.397 | 0.672  | 0.704  | 0.053  | 0.444 | 0.294 | 0.663 | 0.656 | 0.575 |
| DB03312 | Brivudine                                                                      | -0.234 | -0.397 | 0.672  | 0.704  | 0.053  | 0.444 | 0.294 | 0.663 | 0.656 | 0.575 |
| DB01132 | Pioglitazone                                                                   | -0.233 | 0.261  | 0.612  | 0.007  | -0.771 | 0.371 | 0.536 | 0.556 | 0.42  | 0.164 |
| DB03203 | Sphingosine                                                                    | -0.233 | -0.017 | -0.067 | -0.071 | -0.365 | 0.512 | 0.624 | 0.378 | 0.318 | 0.301 |
| DB00150 | L-Tryptophan                                                                   | -0.232 | -0.681 | 1.827  | 1.456  | 0.181  | 0.361 | 0.206 | 0.93  | 0.887 | 0.496 |
| DB09301 | Chondroitin sulfate                                                            | -0.232 | -0.136 | -0.513 | 0.66   | 0.146  | 0.366 | 0.385 | 0.065 | 0.511 | 0.473 |

|         |                                                                                                            |        |        |        |        |        |       |       |       |       |       |
|---------|------------------------------------------------------------------------------------------------------------|--------|--------|--------|--------|--------|-------|-------|-------|-------|-------|
| DB00600 | Monobenzene                                                                                                | -0.23  | 0.159  | 1.164  | -1.405 | -1.002 | 0.421 | 0.628 | 0.803 | 0.034 | 0.055 |
| DB02744 | RPR131247                                                                                                  | -0.23  | -0.069 | 0.792  | -0.533 | -0.308 | 0.355 | 0.401 | 0.677 | 0.243 | 0.301 |
| DB01426 | Ajmaline                                                                                                   | -0.229 | 0.046  | 0.602  | -0.04  | -0.846 | 0.437 | 0.56  | 0.67  | 0.275 | 0.104 |
| DB07859 | 4-(4-CHLOROPHENYL)-4-[4-(1H-PYRAZOL-4-YL)PHENYL]PIPERIDINE                                                 | -0.228 | -0.434 | 1.46   | 0.136  | -0.138 | 0.32  | 0.219 | 0.947 | 0.462 | 0.325 |
| DB07947 | ISOQUINOLINE-5-SULFONIC ACID (2-(2-(4-CHLOROBENZYLOXY)ETHYLAMINO)ETHYL)AMIDE                               | -0.228 | -0.434 | 1.46   | 0.136  | -0.138 | 0.32  | 0.219 | 0.947 | 0.462 | 0.325 |
| DB08148 | 1-[4-(4-chlorophenyl)-1-(7H-pyrrolo[2,3-d]pyrimidin-4-yl)piperidin-4-yl]methanamine                        | -0.228 | -0.434 | 1.46   | 0.136  | -0.138 | 0.32  | 0.219 | 0.947 | 0.462 | 0.325 |
| DB08149 | 1-[4-(4-chlorobenzyl)-1-(7H-pyrrolo[2,3-d]pyrimidin-4-yl)piperidin-4-yl]methanamine                        | -0.228 | -0.434 | 1.46   | 0.136  | -0.138 | 0.32  | 0.219 | 0.947 | 0.462 | 0.325 |
| DB02431 | Cytidine-5'-Triphosphate                                                                                   | -0.226 | 0.16   | 0.329  | -0.505 | -0.855 | 0.564 | 0.761 | 0.761 | 0.144 | 0.143 |
| DB03367 | PF-00356231                                                                                                | -0.224 | -0.183 | 0.021  | 0.527  | 0.123  | 0.375 | 0.372 | 0.341 | 0.466 | 0.456 |
| DB02761 | S-Mercaptocysteine                                                                                         | -0.223 | 0.378  | 0.673  | 0.931  | -1.552 | 0.369 | 0.661 | 0.614 | 0.62  | 0.018 |
| DB03851 | Carbazole Butanoic Acid                                                                                    | -0.223 | -0.048 | 1.795  | 0.012  | -0.682 | 0.422 | 0.487 | 0.925 | 0.274 | 0.162 |
| DB06938 | 4-[[2-[[4-chloro-3-(trifluoromethyl)phenyl]amino]-3H-benzimidazol-5-yl]oxy]-N-methylpyridine-2-carboxamide | -0.223 | -0.555 | 1.265  | 0.403  | 0.095  | 0.367 | 0.225 | 0.841 | 0.525 | 0.46  |
| DB00573 | Fenoprofen                                                                                                 | -0.222 | -0.025 | 1.608  | 0.856  | -1.027 | 0.34  | 0.434 | 0.908 | 0.772 | 0.128 |
| DB01884 | 2-Amino-3-Methyl-1-Pyrrolidin-1-Yl-Butan-1-One                                                             | -0.221 | 0.128  | -0.662 | -0.076 | -0.403 | 0.492 | 0.681 | 0.036 | 0.256 | 0.275 |
| DB04459 | 3,4-Dichloroisocoumarin                                                                                    | -0.221 | -0.027 | 0.359  | 0.109  | -0.496 | 0.393 | 0.515 | 0.531 | 0.316 | 0.221 |
| DB07666 | (3R,4S)-1-[6-[3-(METHYLSULFONYL)PHENYL]PYRIMIDIN-4-YL]-4-(2,4,5-TRIFLUOROPHENYL)PYRROLIDIN-3-AMINE         | -0.221 | 0.128  | -0.662 | -0.076 | -0.403 | 0.492 | 0.681 | 0.036 | 0.256 | 0.275 |
| DB07901 | 5-CHLORO-6-METHYL-N-(2-PHENYLETHYL)-2-PYRIDIN-2-YLPYRIMIDIN-4-AMINE                                        | -0.221 | -0.014 | 1.023  | 0.028  | -1.089 | 0.425 | 0.55  | 0.807 | 0.31  | 0.039 |
| DB08445 | (3R,4S)-1-[6-(6-METHOXPYRIDIN-3-YL)PYRIMIDIN-4-YL]-4-(2,4,5-TRIFLUOROPHENYL)PYRROLIDIN-3-AMINE             | -0.221 | 0.128  | -0.662 | -0.076 | -0.403 | 0.492 | 0.681 | 0.036 | 0.256 | 0.275 |
| DB01077 | Etidronic acid                                                                                             | -0.22  | 0.137  | -1.198 | 0.891  | -1.101 | 0.392 | 0.526 | 0.081 | 0.613 | 0.087 |
| DB03106 | scyllo-inositol                                                                                            | -0.219 | 0.502  | 1.26   | 0.104  | -1.626 | 0.425 | 0.808 | 0.832 | 0.32  | 0.005 |
| DB03760 | Dihydrolipoic Acid                                                                                         | -0.219 | 0.596  | 2.035  | 0.38   | -2.27  | 0.392 | 0.772 | 0.943 | 0.383 | 0.001 |
| DB01645 | Genistein                                                                                                  | -0.217 | 0.668  | -0.781 | -0.829 | -0.857 | 0.281 | 0.727 | 0.172 | 0.156 | 0.117 |
| DB02959 | Oxatriptan                                                                                                 | -0.214 | -0.386 | 0.702  | 1.321  | -0.84  | 0.379 | 0.28  | 0.614 | 0.784 | 0.156 |
| DB08063 | 1-BENZYL-3-(4-METHOXYPHENYLAMINO)-4-PHENYLPYRROLE-2,5-DIONE                                                | -0.214 | 0.743  | 0.184  | -0.607 | 0.208  | 0.374 | 0.729 | 0.188 | 0.206 | 0.498 |
| DB06908 | (2S)-3-(1-[[2-(2-CHLOROPHENYL)-5-METHYL-1,3-OXAZOL-4-YL]METHYL]-1H-INDOL-5-YL)-2-ETHOXYPROPANOIC ACID      | -0.213 | -0.115 | 1.169  | 1.371  | -1.279 | 0.366 | 0.395 | 0.804 | 0.791 | 0.061 |
| DB06779 | Dalteparin                                                                                                 | -0.211 | -0.303 | 1.286  | 0.52   | 0.002  | 0.387 | 0.33  | 0.824 | 0.429 | 0.42  |
| DB07348 | Brefeldin A                                                                                                | -0.211 | 0.17   | 1.255  | -0.863 | -0.607 | 0.454 | 0.616 | 0.866 | 0.086 | 0.173 |
| DB01072 | Atazanavir                                                                                                 | -0.21  | 0.323  | 0.723  | 0.073  | -1.215 | 0.376 | 0.577 | 0.689 | 0.327 | 0.08  |
| DB05360 |                                                                                                            | -0.21  | 0.426  | -0.633 | 0.335  | -0.762 | 0.41  | 0.729 | 0.131 | 0.503 | 0.132 |
| DB06834 | N-(2-hydroxy-1,1-dimethylethyl)-1-methyl-3-(1H-pyrrolo[2,3-b]pyridin-2-yl)-1H-indole-5-carboxamide         | -0.21  | -0.261 | 0.173  | 0.477  | 0.112  | 0.379 | 0.34  | 0.183 | 0.549 | 0.445 |
| DB00712 | Flurbiprofen                                                                                               | -0.209 | 0.364  | 1.114  | -0.966 | -1.118 | 0.374 | 0.616 | 0.792 | 0.087 | 0.089 |

|         |                                                                                                                |        |        |        |        |        |       |       |       |       |       |
|---------|----------------------------------------------------------------------------------------------------------------|--------|--------|--------|--------|--------|-------|-------|-------|-------|-------|
| DB06554 | Gaboxadol                                                                                                      | -0.209 | -0.098 | 2.168  | -0.34  | -0.578 | 0.482 | 0.477 | 0.951 | 0.195 | 0.175 |
| DB00782 | Propranolol                                                                                                    | -0.208 | 0.582  | -0.189 | -0.812 | -0.677 | 0.359 | 0.67  | 0.191 | 0.149 | 0.183 |
| DB00033 | Interferon gamma-1b                                                                                            | -0.207 | 0.158  | 0.843  | -0.145 | -0.862 | 0.478 | 0.732 | 0.756 | 0.247 | 0.069 |
| DB01408 | Bambuterol                                                                                                     | -0.207 | 0.414  | -1.941 | 0.36   | -1.195 | 0.381 | 0.613 | 0.007 | 0.528 | 0.071 |
| DB02552 | Geranyl Diphosphate                                                                                            | -0.205 | 0.2    | 0.196  | 0.037  | -0.595 | 0.491 | 0.717 | 0.482 | 0.287 | 0.167 |
| DB04714 | ISOPENTENYL PYROPHOSPHATE                                                                                      | -0.205 | 0.2    | 0.196  | 0.037  | -0.595 | 0.491 | 0.717 | 0.482 | 0.287 | 0.167 |
| DB06711 | Naphazoline                                                                                                    | -0.205 | 0.001  | 2.537  | 0.382  | -1.325 | 0.376 | 0.446 | 0.975 | 0.369 | 0.054 |
| DB06830 | (1-HYDROXYHEPTANE-1,1-DIYL)BIS(PHOSPHONIC ACID)                                                                | -0.205 | 0.2    | 0.196  | 0.037  | -0.595 | 0.491 | 0.717 | 0.482 | 0.287 | 0.167 |
| DB06931 | (1-HYDROXYNONANE-1,1-DIYL)BIS(PHOSPHONIC ACID)                                                                 | -0.205 | 0.2    | 0.196  | 0.037  | -0.595 | 0.491 | 0.717 | 0.482 | 0.287 | 0.167 |
| DB07873 | Lauryl alcohol diphosphonic acid                                                                               | -0.205 | 0.2    | 0.196  | 0.037  | -0.595 | 0.491 | 0.717 | 0.482 | 0.287 | 0.167 |
| DB08826 | Deferiprone                                                                                                    | -0.204 | -0.017 | 0.878  | 0.251  | -0.477 | 0.602 | 0.692 | 0.886 | 0.527 | 0.247 |
| DB03044 | 1-(5-Tert-Butyl-2-P-Tolyl-2h-Pyrazol-3-Yl)-3-[4-(2-Morpholin-4-Yl-Ethoxy)-Naphthalen-1-Yl]-Urea                | -0.202 | 0.194  | 1.193  | -0.388 | 0.019  | 0.334 | 0.51  | 0.85  | 0.259 | 0.451 |
| DB00621 | Oxandrolone                                                                                                    | -0.2   | -0.091 | -1.06  | -0.589 | 0.321  | 0.333 | 0.419 | 0.075 | 0.159 | 0.614 |
| DB00858 | Drostanolone                                                                                                   | -0.2   | -0.091 | -1.06  | -0.589 | 0.321  | 0.333 | 0.419 | 0.075 | 0.159 | 0.614 |
| DB01606 | Tazobactam                                                                                                     | -0.2   | -0.091 | -1.06  | -0.589 | 0.321  | 0.333 | 0.419 | 0.075 | 0.159 | 0.614 |
| DB01783 | Pantothenic acid                                                                                               | -0.2   | -0.091 | -1.06  | -0.589 | 0.321  | 0.333 | 0.419 | 0.075 | 0.159 | 0.614 |
| DB04823 | Oxyphenisatin                                                                                                  | -0.2   | -0.091 | -1.06  | -0.589 | 0.321  | 0.333 | 0.419 | 0.075 | 0.159 | 0.614 |
| DB05016 | Ataluren                                                                                                       | -0.2   | -0.091 | -1.06  | -0.589 | 0.321  | 0.333 | 0.419 | 0.075 | 0.159 | 0.614 |
| DB05288 | Anecortave acetate                                                                                             | -0.2   | -0.091 | -1.06  | -0.589 | 0.321  | 0.333 | 0.419 | 0.075 | 0.159 | 0.614 |
| DB06811 | Polidocanol                                                                                                    | -0.2   | -0.091 | -1.06  | -0.589 | 0.321  | 0.333 | 0.419 | 0.075 | 0.159 | 0.614 |
| DB08804 | Nandrolone decanoate                                                                                           | -0.2   | -0.091 | -1.06  | -0.589 | 0.321  | 0.333 | 0.419 | 0.075 | 0.159 | 0.614 |
| DB08899 | Enzalutamide                                                                                                   | -0.2   | -0.091 | -1.06  | -0.589 | 0.321  | 0.333 | 0.419 | 0.075 | 0.159 | 0.614 |
| DB09015 | Canrenoic acid                                                                                                 | -0.2   | -0.091 | -1.06  | -0.589 | 0.321  | 0.333 | 0.419 | 0.075 | 0.159 | 0.614 |
| DB11371 | Alfaxalone                                                                                                     | -0.2   | -0.091 | -1.06  | -0.589 | 0.321  | 0.333 | 0.419 | 0.075 | 0.159 | 0.614 |
| DB11921 | Deflazacort                                                                                                    | -0.2   | -0.091 | -1.06  | -0.589 | 0.321  | 0.333 | 0.419 | 0.075 | 0.159 | 0.614 |
| DB13155 | Esculin                                                                                                        | -0.2   | -0.091 | -1.06  | -0.589 | 0.321  | 0.333 | 0.419 | 0.075 | 0.159 | 0.614 |
| DB00127 | Spermine                                                                                                       | -0.199 | 0.513  | -0.859 | 1.609  | -1.458 | 0.381 | 0.648 | 0.113 | 0.918 | 0.054 |
| DB00205 | Pyrimethamine                                                                                                  | -0.199 | 0.215  | 0.625  | -0.659 | -0.397 | 0.302 | 0.511 | 0.589 | 0.195 | 0.235 |
| DB04590 | (2R)-({4-[AMINO(IMINO)METHYL]PHENYL}AMINO){5-ETHOXY-2-FLUORO-3-[(3R)-TETRAHYDROFURAN-3-YLOXY]PHENYL}ACETICACID | -0.199 | -0.082 | 0.406  | 0.404  | -0.231 | 0.399 | 0.421 | 0.54  | 0.389 | 0.33  |
| DB06626 | Axitinib                                                                                                       | -0.199 | -0.46  | 0.16   | 0.492  | -0.21  | 0.34  | 0.243 | 0.512 | 0.679 | 0.306 |
| DB04326 | Dihydroxyacetone phosphate                                                                                     | -0.198 | -0.038 | 0.709  | -0.359 | -1.326 | 0.392 | 0.447 | 0.645 | 0.228 | 0.057 |
| DB08885 | Aflibercept                                                                                                    | -0.198 | 0.14   | 0.629  | 0.034  | -0.252 | 0.442 | 0.59  | 0.668 | 0.297 | 0.339 |
| DB00118 | Ademetionine                                                                                                   | -0.197 | -0.632 | -1.148 | 0.891  | 0.524  | 0.381 | 0.216 | 0.048 | 0.689 | 0.596 |
| DB02264 | O2-Sulfo-Glucuronic Acid                                                                                       | -0.196 | 0.391  | 1.039  | 0.233  | -0.983 | 0.506 | 0.788 | 0.806 | 0.489 | 0.039 |
| DB00030 | Insulin Human                                                                                                  | -0.195 | -0.771 | -0.801 | 0.653  | 1.278  | 0.379 | 0.191 | 0.127 | 0.7   | 0.877 |
| DB02440 |                                                                                                                | -0.195 | -0.157 | 0.976  | -0.16  | -0.36  | 0.303 | 0.381 | 0.734 | 0.312 | 0.228 |
| DB07766 | (2Z,3E)-2,3'-BIINDOLE-2',3(1H,1'H)-DIONE 3-(O-[(3R)-3,4-DIHYDROXYBUTYL]OXIME)                                  | -0.194 | -0.387 | 0.049  | 1.146  | 0.355  | 0.383 | 0.313 | 0.169 | 0.708 | 0.574 |
| DB00481 | Raloxifene                                                                                                     | -0.193 | 0.592  | 1.212  | 0.628  | -0.545 | 0.342 | 0.693 | 0.852 | 0.706 | 0.223 |
| DB01325 | Quinethazone                                                                                                   | -0.193 | 1.053  | 1.886  | -1.184 | -2.285 | 0.397 | 0.868 | 0.928 | 0.064 | 0.005 |
| DB04899 | Nesiritide                                                                                                     | -0.192 | 0.234  | -0.397 | -0.313 | -0.7   | 0.557 | 0.773 | 0.226 | 0.189 | 0.114 |
| DB00112 | Bevacizumab                                                                                                    | -0.19  | -0.552 | 0.156  | -0.14  | 1.317  | 0.385 | 0.245 | 0.392 | 0.346 | 0.881 |
| DB00507 | Nitazoxanide                                                                                                   | -0.19  | 0.16   | 0.264  | 0.296  | -0.628 | 0.434 | 0.588 | 0.491 | 0.38  | 0.166 |
| DB06213 | Regadenoson                                                                                                    | -0.189 | 0.392  | -0.975 | -0.219 | -0.729 | 0.465 | 0.77  | 0.016 | 0.195 | 0.117 |
| DB06786 | Halcinonide                                                                                                    | -0.189 | 0.236  | -1.311 | -1.581 | 0.463  | 0.289 | 0.522 | 0.072 | 0.045 | 0.627 |
| DB08770 | 4-{2-[(7-amino-2-furan-2-yl[1,2,4]triazolo[1,5-a][1,3,5]triazin-5-yl)amino]ethyl}phenol                        | -0.189 | 0.392  | -0.975 | -0.219 | -0.729 | 0.465 | 0.77  | 0.016 | 0.195 | 0.117 |
| DB03435 | Uridine-5'-Diphosphate                                                                                         | -0.188 | 0.274  | -0.824 | -0.161 | -1.014 | 0.393 | 0.63  | 0.105 | 0.237 | 0.107 |
| DB00467 | Enoxacin                                                                                                       | -0.187 | 0.417  | 0.911  | -1.57  | -0.292 | 0.371 | 0.601 | 0.712 | 0.036 | 0.307 |

|         |                                                                                                                                                |        |        |        |        |        |       |       |       |       |       |
|---------|------------------------------------------------------------------------------------------------------------------------------------------------|--------|--------|--------|--------|--------|-------|-------|-------|-------|-------|
| DB07768 | Epitestosterone                                                                                                                                | -0.186 | -0.144 | -1.473 | -0.43  | -0.168 | 0.303 | 0.348 | 0.059 | 0.258 | 0.315 |
| DB08818 | Hyaluronic acid                                                                                                                                | -0.185 | 0.799  | 1.224  | -0.937 | -2.263 | 0.385 | 0.756 | 0.837 | 0.126 | 0.014 |
| DB00498 | Phenindione                                                                                                                                    | -0.178 | 0.499  | -2.339 | 0.645  | -0.244 | 0.444 | 0.784 | 0.002 | 0.529 | 0.35  |
| DB00324 | Fluorometholone                                                                                                                                | -0.177 | 0.149  | -1.25  | -1.046 | -0.043 | 0.319 | 0.474 | 0.081 | 0.101 | 0.399 |
| DB02377 | Guanine                                                                                                                                        | -0.177 | -0.12  | 1.225  | -1.135 | -1.003 | 0.468 | 0.479 | 0.842 | 0.052 | 0.052 |
| DB00735 | Naftifine                                                                                                                                      | -0.175 | 0.105  | 0.16   | 0.162  | -0.477 | 0.425 | 0.548 | 0.459 | 0.312 | 0.218 |
| DB00132 | Alpha-Linolenic Acid                                                                                                                           | -0.174 | 0.119  | 0.571  | 0.679  | -0.299 | 0.384 | 0.489 | 0.582 | 0.695 | 0.31  |
| DB07340 | N-6--cyclohexyl-N-2--(4-morpholin-4-ylphenyl)-9H-purine-2,6-diamine                                                                            | -0.174 | -0.139 | -0.522 | -0.219 | -0.249 | 0.316 | 0.358 | 0.144 | 0.337 | 0.284 |
| DB00627 | Niacin                                                                                                                                         | -0.173 | 0.059  | 0.525  | -0.29  | -0.487 | 0.646 | 0.693 | 0.662 | 0.216 | 0.237 |
| DB00062 | Human Serum Albumin                                                                                                                            | -0.17  | 0.143  | 0.17   | 0.401  | -0.546 | 0.439 | 0.577 | 0.438 | 0.43  | 0.19  |
| DB00064 |                                                                                                                                                | -0.17  | 0.143  | 0.17   | 0.401  | -0.546 | 0.439 | 0.577 | 0.438 | 0.43  | 0.19  |
| DB02733 | Purvalanol                                                                                                                                     | -0.17  | 0.057  | 0.514  | -0.619 | -0.573 | 0.296 | 0.425 | 0.625 | 0.192 | 0.174 |
| DB00779 | Nalidixic acid                                                                                                                                 | -0.168 | -0.026 | 1.113  | 0.689  | -0.324 | 0.502 | 0.553 | 0.807 | 0.589 | 0.337 |
| DB09129 | Chromic chloride                                                                                                                               | -0.168 | 0.427  | 1.029  | 0.604  | -1.231 | 0.288 | 0.608 | 0.613 | 0.665 | 0.054 |
| DB01055 | Mimosine                                                                                                                                       | -0.167 | 0.019  | 0.065  | 0.161  | -0.439 | 0.465 | 0.527 | 0.394 | 0.348 | 0.237 |
| DB06791 | Lanreotide                                                                                                                                     | -0.167 | 0.103  | 0.166  | -0.193 | -0.738 | 0.467 | 0.613 | 0.488 | 0.205 | 0.116 |
| DB09099 | Somatostatin                                                                                                                                   | -0.167 | 0.103  | 0.166  | -0.193 | -0.738 | 0.467 | 0.613 | 0.488 | 0.205 | 0.116 |
| DB09112 | Nitrous acid                                                                                                                                   | -0.167 | 1.239  | 0.855  | -1.219 | -1.419 | 0.385 | 0.866 | 0.689 | 0.081 | 0.058 |
| DB08378 | 4-[4-(2,5-DIOXO-PYRROLIDIN-1-YL)-PHENYLAMINO]-4-HYDROXY-BUTYRIC ACID                                                                           | -0.165 | 0.015  | 0.805  | -0.392 | -1.392 | 0.383 | 0.475 | 0.681 | 0.195 | 0.051 |
| DB00233 | Aminosalicylic Acid                                                                                                                            | -0.164 | -0.34  | -0.712 | 1.107  | -1.153 | 0.317 | 0.282 | 0.168 | 0.832 | 0.09  |
| DB02506 | 2,6,8-Trimethyl-3-Amino-9-Benzyl-9-Methoxynonanoic Acid                                                                                        | -0.163 | 0.121  | -0.186 | -0.59  | -0.314 | 0.318 | 0.476 | 0.249 | 0.216 | 0.258 |
| DB07121 | 4-({4-[(4-AMINO BUT-2-YNYL)OXY]PHENYL}SULFONYL)-N-HYDROXY-2,2-DIMETHYLTHIOMORPHOLINE-3-CARBOXAMIDE                                             | -0.163 | 0.273  | 0.091  | 0.082  | -0.819 | 0.487 | 0.708 | 0.418 | 0.293 | 0.108 |
| DB08811 | Tofisopam                                                                                                                                      | -0.162 | 0.474  | 0.25   | -0.313 | -1.343 | 0.49  | 0.812 | 0.538 | 0.185 | 0.023 |
| DB11605 | Myrrh                                                                                                                                          | -0.162 | 0.355  | 0.813  | 0.825  | -1.365 | 0.411 | 0.588 | 0.667 | 0.579 | 0.06  |
| DB01708 | Prasterone                                                                                                                                     | -0.161 | 0.498  | -0.427 | 0.01   | -0.42  | 0.325 | 0.656 | 0.28  | 0.442 | 0.246 |
| DB03193 | Stearic acid                                                                                                                                   | -0.161 | -0.024 | 2.034  | 1.356  | -1.425 | 0.389 | 0.437 | 0.979 | 0.794 | 0.047 |
| DB07858 | (2S)-2-(4-chlorophenyl)-2-[4-(1H-pyrazol-4-yl)phenyl]ethanamine                                                                                | -0.161 | 0.076  | 1.224  | -0.115 | -0.451 | 0.291 | 0.431 | 0.856 | 0.33  | 0.189 |
| DB08070 | 2-[4-(3-METHYL-1H-PYRAZOL-4-YL)PHENYL]ETHANAMINE                                                                                               | -0.161 | 0.076  | 1.224  | -0.115 | -0.451 | 0.291 | 0.431 | 0.856 | 0.33  | 0.189 |
| DB00278 | Argatroban                                                                                                                                     | -0.159 | -0.246 | 0.697  | -0.449 | 0.379  | 0.414 | 0.349 | 0.628 | 0.18  | 0.538 |
| DB08815 | Lurasidone                                                                                                                                     | -0.157 | -0.244 | 2.586  | 0.82   | -1.545 | 0.397 | 0.337 | 0.981 | 0.597 | 0.04  |
| DB00346 | Alfuzosin                                                                                                                                      | -0.154 | -0.09  | 1.565  | 0.138  | -1.213 | 0.463 | 0.456 | 0.893 | 0.298 | 0.045 |
| DB04795 | Thenoyltrifluoroacetone                                                                                                                        | -0.154 | 0.13   | 1.09   | 0.255  | -0.875 | 0.518 | 0.666 | 0.808 | 0.415 | 0.082 |
| DB00325 | Nitroprusside                                                                                                                                  | -0.152 | 0.156  | -0.12  | -0.159 | -0.419 | 0.549 | 0.663 | 0.331 | 0.225 | 0.273 |
| DB02354 | 4-([1-Methyl-5-(2-Methyl-Benzimidazol-1-Ylmethyl)-1h-Benzimidazol-2-Ylmethyl]-Amino)-Benzamidine                                               | -0.15  | 0.281  | -0.361 | -0.12  | -0.553 | 0.388 | 0.564 | 0.107 | 0.284 | 0.226 |
| DB04107 | [(1-{2}[(4-Carbamidoyl-Phenylamino)-Methyl]-1-Methyl-1h-Benzimidazol-5-Yl)-Cyclopropyl]-Pyridin-2-Yl-Methyleneaminoxy]-Acetic Acid Ethyl Ester | -0.15  | 0.281  | -0.361 | -0.12  | -0.553 | 0.388 | 0.564 | 0.107 | 0.284 | 0.226 |
| DB06414 | Etravirine                                                                                                                                     | -0.15  | -0.087 | -0.051 | -0.724 | 0.056  | 0.406 | 0.404 | 0.3   | 0.128 | 0.429 |
| DB07191 |                                                                                                                                                | -0.15  | -0.087 | -0.051 | -0.724 | 0.056  | 0.406 | 0.404 | 0.3   | 0.128 | 0.429 |
| DB08905 | Formestane                                                                                                                                     | -0.15  | -0.103 | -1.195 | -0.634 | 0.411  | 0.318 | 0.38  | 0.066 | 0.17  | 0.626 |
| DB07186 | 4-(4-METHYLPIPERAZIN-1-YL)-N-[5-(2-THIENYLACETYL)-1,5-DIHYDROPYRROLO[3,4-C]PYRAZOL-3-YL]BENZAMIDE                                              | -0.149 | -0.532 | 0.89   | -0.208 | 0.267  | 0.322 | 0.184 | 0.542 | 0.311 | 0.51  |

|         |                                                                                                     |        |        |        |        |        |       |       |       |       |       |
|---------|-----------------------------------------------------------------------------------------------------|--------|--------|--------|--------|--------|-------|-------|-------|-------|-------|
| DB09276 | Sodium aurothiomalate                                                                               | -0.148 | 0.407  | 0.818  | 0.343  | -1.013 | 0.342 | 0.605 | 0.581 | 0.575 | 0.091 |
| DB00673 | Aprepitant                                                                                          | -0.147 | 0.033  | -0.155 | -0.081 | -0.338 | 0.542 | 0.607 | 0.314 | 0.27  | 0.302 |
| DB04705 | (3BETA)-CHOLEST-5-ENE-3,25-DIOL                                                                     | -0.147 | 0.266  | 0.98   | 1.125  | -1.434 | 0.395 | 0.548 | 0.751 | 0.704 | 0.053 |
| DB01608 | Periciazine                                                                                         | -0.144 | -0.02  | -1.33  | -0.488 | 0.096  | 0.299 | 0.391 | 0.047 | 0.211 | 0.431 |
| DB00797 | Tolazoline                                                                                          | -0.142 | 0.32   | 2.739  | 0.222  | -0.812 | 0.474 | 0.696 | 0.979 | 0.489 | 0.098 |
| DB08908 | Dimethyl fumarate                                                                                   | -0.142 | -0.063 | 0.629  | -0.972 | 0.436  | 0.305 | 0.384 | 0.392 | 0.109 | 0.595 |
| DB00393 | Nimodipine                                                                                          | -0.14  | 1.099  | 1.603  | -0.055 | -1.486 | 0.362 | 0.879 | 0.926 | 0.371 | 0.058 |
| DB00038 | Oprelvekin                                                                                          | -0.134 | -0.168 | 0.087  | -0.104 | -0.314 | 0.33  | 0.318 | 0.39  | 0.35  | 0.303 |
| DB00174 | Asparagine                                                                                          | -0.134 | 0.712  | 0.238  | -0.05  | -1.051 | 0.407 | 0.72  | 0.417 | 0.332 | 0.109 |
| DB06700 | Desvenlafaxine                                                                                      | -0.134 | 0.208  | 0.37   | -0.387 | -0.61  | 0.587 | 0.734 | 0.614 | 0.163 | 0.164 |
| DB06701 | Dexmethylphenidate                                                                                  | -0.134 | 0.208  | 0.37   | -0.387 | -0.61  | 0.587 | 0.734 | 0.614 | 0.163 | 0.164 |
| DB08544 | (S)-Fluoxetine                                                                                      | -0.134 | 0.208  | 0.37   | -0.387 | -0.61  | 0.587 | 0.734 | 0.614 | 0.163 | 0.164 |
| DB08918 | Levomilnacipran                                                                                     | -0.134 | 0.208  | 0.37   | -0.387 | -0.61  | 0.587 | 0.734 | 0.614 | 0.163 | 0.164 |
| DB09185 | Viloxazine                                                                                          | -0.134 | 0.208  | 0.37   | -0.387 | -0.61  | 0.587 | 0.734 | 0.614 | 0.163 | 0.164 |
| DB00095 | Efalizumab                                                                                          | -0.131 | -0.243 | 0.065  | -0.196 | 1.242  | 0.395 | 0.338 | 0.357 | 0.349 | 0.853 |
| DB03041 | UDP-alpha-D-glucuronic acid                                                                         | -0.131 | 0.111  | 1.082  | 0.014  | -0.571 | 0.526 | 0.62  | 0.802 | 0.27  | 0.195 |
| DB01395 | Drospirenone                                                                                        | -0.13  | 0.099  | -0.859 | -0.608 | -0.145 | 0.339 | 0.447 | 0.087 | 0.174 | 0.315 |
| DB01105 | Sibutramine                                                                                         | -0.129 | 1.484  | -0.539 | -1.37  | -0.432 | 0.402 | 0.926 | 0.171 | 0.071 | 0.259 |
| DB01211 | Clarithromycin                                                                                      | -0.129 | 0.202  | 0.051  | 0.076  | -0.582 | 0.513 | 0.659 | 0.392 | 0.292 | 0.19  |
| DB02007 | alpha-D-glucose 6-phosphate                                                                         | -0.129 | -0.421 | 1.85   | 0.832  | -0.808 | 0.399 | 0.285 | 0.912 | 0.59  | 0.144 |
| DB06176 | Romidepsin                                                                                          | -0.128 | 0.054  | 0.687  | -0.563 | 0.148  | 0.323 | 0.428 | 0.617 | 0.241 | 0.497 |
| DB11594 | Domiphen                                                                                            | -0.128 | 0.505  | 1.236  | 0.144  | -1.338 | 0.508 | 0.822 | 0.852 | 0.323 | 0.021 |
| DB02660 | Filaminast                                                                                          | -0.125 | -0.39  | 0.38   | 0.276  | -0.422 | 0.339 | 0.252 | 0.331 | 0.479 | 0.228 |
| DB00707 | Porfimer sodium                                                                                     | -0.123 | 0.382  | 0.191  | 0.048  | -0.898 | 0.537 | 0.782 | 0.477 | 0.305 | 0.083 |
| DB01134 | Desoxycorticosterone pivalate                                                                       | -0.123 | 0.059  | -1.116 | -0.456 | 0.063  | 0.326 | 0.458 | 0.067 | 0.216 | 0.41  |
| DB08860 | Pitavastatin                                                                                        | -0.123 | -0.137 | -1.116 | -0.456 | 0.623  | 0.326 | 0.363 | 0.067 | 0.216 | 0.701 |
| DB01089 | Deserpidine                                                                                         | -0.122 | 0.006  | -1.293 | -0.62  | 0.412  | 0.339 | 0.47  | 0.051 | 0.159 | 0.619 |
| DB03444 | (3e)-6'-Bromo-2,3'-Biindole-2',3(1h,1'h)-Dione 3-Oxime                                              | -0.12  | 0.397  | -1.461 | 0.055  | -0.599 | 0.334 | 0.612 | 0.051 | 0.478 | 0.171 |
| DB06694 | Xylometazoline                                                                                      | -0.119 | -0.495 | 3.37   | 0.838  | -0.844 | 0.406 | 0.25  | 0.997 | 0.698 | 0.136 |
| DB08079 | AMG-208                                                                                             | -0.119 | 0.019  | 0.549  | 0.815  | -0.188 | 0.502 | 0.557 | 0.575 | 0.605 | 0.401 |
| DB04233 | (Hydroxyethyloxy)Tri(Ethyloxy)Octane                                                                | -0.118 | 0.919  | 0.706  | -0.403 | -0.866 | 0.419 | 0.781 | 0.628 | 0.244 | 0.133 |
| DB08564 | (2E)-N-{4-[(3-bromophenyl)amino]quinazolin-6-yl}-4-(dimethylamino)but-2-enamide                     | -0.118 | 0.51   | 1.084  | 0.104  | -1.015 | 0.316 | 0.65  | 0.643 | 0.457 | 0.08  |
| DB00630 | Alendronic acid                                                                                     | -0.115 | 0.053  | -0.908 | 1.416  | -1.058 | 0.411 | 0.468 | 0.126 | 0.831 | 0.116 |
| DB01834 | (9R,10R)-9-(S-glutathionyl)-10-hydroxy-9,10-dihydrophenanthrene                                     | -0.114 | 0.008  | 0.798  | -0.891 | -0.91  | 0.596 | 0.619 | 0.752 | 0.086 | 0.071 |
| DB04690 | Camptothecin                                                                                        | -0.113 | 1.451  | 0.843  | -3.625 | -0.578 | 0.315 | 0.95  | 0.507 | 0.004 | 0.153 |
| DB00040 | Glucagon                                                                                            | -0.112 | 0.163  | -0.386 | -0.213 | -0.402 | 0.593 | 0.693 | 0.196 | 0.251 | 0.277 |
| DB00397 | Phenylpropanolamine                                                                                 | -0.112 | -0.137 | 0.28   | 0.912  | -1.39  | 0.407 | 0.376 | 0.481 | 0.744 | 0.068 |
| DB11363 | Alectinib                                                                                           | -0.112 | 0.027  | 1.073  | -0.389 | -0.93  | 0.404 | 0.476 | 0.796 | 0.285 | 0.131 |
| DB06262 | Droxidopa                                                                                           | -0.11  | 0.071  | 0.944  | 1.151  | -1.326 | 0.421 | 0.473 | 0.741 | 0.826 | 0.063 |
| DB00924 | Cyclobenzaprine                                                                                     | -0.108 | -0.535 | -0.268 | 1.143  | -0.802 | 0.408 | 0.251 | 0.261 | 0.823 | 0.162 |
| DB07970 | 5-[(2-methyl-5-[[3-(trifluoromethyl)phenyl]carbamoyl]phenyl)amino]pyridine-3-carboxamide            | -0.107 | 0.062  | 0.428  | 0.293  | -0.366 | 0.503 | 0.556 | 0.551 | 0.383 | 0.275 |
| DB08067 | 4-[(2-{4-[(CYCLOPROPYLCARBAMOYL)AMINO]-1H-PYRAZOL-3-YL}-1H-BENZIMIDAZOL-6-YL)METHYL]MORPHOLIN-4-IUM | -0.106 | -0.232 | 0.327  | -0.866 | 0.271  | 0.352 | 0.34  | 0.526 | 0.157 | 0.545 |
| DB09286 | Pipamperone                                                                                         | -0.106 | -0.452 | 1.495  | 1.532  | -0.062 | 0.423 | 0.265 | 0.893 | 0.932 | 0.39  |
| DB08577 | 3-[(3-(2-CARBOXYETHYL)-4-METHYLPYRROL-2-YL)METHYLENE]-2-INDOLINONE                                  | -0.104 | 0.698  | 0.953  | -1.175 | -0.826 | 0.454 | 0.781 | 0.742 | 0.071 | 0.122 |



|         |                                                                                                                                                             |        |        |        |        |        |       |       |       |       |       |
|---------|-------------------------------------------------------------------------------------------------------------------------------------------------------------|--------|--------|--------|--------|--------|-------|-------|-------|-------|-------|
| DB08912 | Dabrafenib                                                                                                                                                  | -0.103 | -0.708 | 0.53   | 2.538  | -0.297 | 0.415 | 0.199 | 0.407 | 0.983 | 0.322 |
| DB08300 | 1-methyl-3-naphthalen-2-yl-1H-pyrazolo[3,4-d]pyrimidin-4-amine                                                                                              | -0.101 | -0.096 | 0.48   | -0.403 | -0.128 | 0.35  | 0.347 | 0.55  | 0.285 | 0.362 |
| DB00449 | Dipivefrin                                                                                                                                                  | -0.1   | 0.75   | -0.177 | 0.461  | -1.389 | 0.444 | 0.735 | 0.204 | 0.561 | 0.051 |
| DB00536 | Guanidine                                                                                                                                                   | -0.098 | 0.104  | 1.315  | 1.169  | -1.378 | 0.417 | 0.48  | 0.834 | 0.751 | 0.055 |
| DB07335 | 3-[4-AMINO-1-(1-METHYLETHYL)-1H-PYRAZOLO[3,4-D]PYRIMIDIN-3-YL]PHENOL                                                                                        | -0.095 | -0.202 | 0.572  | -0.165 | -0.05  | 0.332 | 0.298 | 0.584 | 0.367 | 0.39  |
| DB08053 | 1-cyclobutyl-3-(3,4-dimethoxyphenyl)-1H-pyrazolo[3,4-d]pyrimidin-4-amine                                                                                    | -0.095 | -0.202 | 0.572  | -0.165 | -0.05  | 0.332 | 0.298 | 0.584 | 0.367 | 0.39  |
| DB08054 | 1-(1-methylethyl)-3-quinolin-6-yl-1H-pyrazolo[3,4-d]pyrimidin-4-amine                                                                                       | -0.095 | -0.202 | 0.572  | -0.165 | -0.05  | 0.332 | 0.298 | 0.584 | 0.367 | 0.39  |
| DB01126 | Dutasteride                                                                                                                                                 | -0.094 | 0.111  | -0.079 | -0.727 | -0.33  | 0.56  | 0.55  | 0.49  | 0.256 | 0.525 |
| DB00180 | Flunisolide                                                                                                                                                 | -0.093 | 0.118  | -1.204 | -1.166 | 0.369  | 0.337 | 0.472 | 0.083 | 0.074 | 0.575 |
| DB00253 | Medrysone                                                                                                                                                   | -0.093 | 0.118  | -1.204 | -1.166 | 0.369  | 0.337 | 0.472 | 0.083 | 0.074 | 0.575 |
| DB00394 | Beclomethasone dipropionate                                                                                                                                 | -0.093 | 0.118  | -1.204 | -1.166 | 0.369  | 0.337 | 0.472 | 0.083 | 0.074 | 0.575 |
| DB01128 | Bicalutamide                                                                                                                                                | -0.092 | 0.228  | -0.564 | -0.42  | 0.184  | 0.357 | 0.547 | 0.196 | 0.239 | 0.461 |
| DB09220 | Nicorandil                                                                                                                                                  | -0.092 | 0.505  | 0.615  | 0.713  | -0.892 | 0.525 | 0.772 | 0.646 | 0.699 | 0.089 |
| DB03226 | Trifluoroethanol                                                                                                                                            | -0.086 | 0.175  | 1.021  | 0.005  | 0.403  | 0.522 | 0.574 | 0.763 | 0.442 | 0.653 |
| DB08052 | 1-cyclopentyl-3-(1H-pyrrolo[2,3-b]pyridin-5-yl)-1H-pyrazolo[3,4-d]pyrimidin-4-amine                                                                         | -0.086 | -0.15  | 0.489  | -0.074 | -0.21  | 0.372 | 0.349 | 0.548 | 0.387 | 0.311 |
| DB08653 | 2-(1H-INDOL-3-YL)ETHANAMINE                                                                                                                                 | -0.086 | -1.122 | 1.551  | 1.684  | 0.378  | 0.423 | 0.104 | 0.897 | 0.948 | 0.556 |
| DB00128 | Aspartic acid                                                                                                                                               | -0.085 | -0.322 | 0.768  | 1.151  | -0.223 | 0.423 | 0.317 | 0.669 | 0.826 | 0.337 |
| DB09123 | Dienogest                                                                                                                                                   | -0.084 | 0.072  | -1.042 | -0.744 | 0.233  | 0.349 | 0.465 | 0.078 | 0.148 | 0.497 |
| DB05234 | LGD2941                                                                                                                                                     | -0.083 | 0.214  | -1.229 | -1.219 | 0.092  | 0.341 | 0.491 | 0.081 | 0.068 | 0.441 |
| DB08674 | (20S)-19,20,21,22-TETRAHYDRO-19-OXO-5H-18,20-ETHANO-12,14-ETHENO-6,10-METHENO-18H-BENZ[D]IMIDAZO[4,3-K][1,6,9,12]OXATRIAZA-CYCLOOCTADECOSINE-9-CARBONITRILE | -0.083 | 1.075  | 1.892  | 0.718  | -1.915 | 0.427 | 0.843 | 0.925 | 0.532 | 0.012 |
| DB08867 | Ulipristal                                                                                                                                                  | -0.083 | 0.214  | -1.229 | -1.219 | 0.092  | 0.341 | 0.491 | 0.081 | 0.068 | 0.441 |
| DB00878 | Chlorhexidine                                                                                                                                               | -0.082 | 0.523  | 0.266  | 0.727  | 0.171  | 0.424 | 0.662 | 0.455 | 0.697 | 0.488 |
| DB04140 | 1-Benzyl-3-(4-Methoxy-Benzenesulfonyl)-6-Oxo-Hexahydro-Pyrimidine-4-Carboxylic Acid Hydroxyamide                                                            | -0.081 | -0.075 | 0.55   | 0.704  | 0.282  | 0.441 | 0.397 | 0.567 | 0.518 | 0.512 |
| DB00834 | Mifepristone                                                                                                                                                | -0.08  | 0.332  | -0.625 | -0.783 | 0.029  | 0.365 | 0.57  | 0.2   | 0.154 | 0.436 |
| DB03499 | Malate Ion                                                                                                                                                  | -0.08  | 0.139  | 0.745  | -0.182 | -0.461 | 0.658 | 0.732 | 0.742 | 0.231 | 0.249 |
| DB00892 | Oxybuprocaine                                                                                                                                               | -0.077 | 0.063  | 0.446  | -0.245 | -0.299 | 0.343 | 0.401 | 0.438 | 0.267 | 0.242 |
| DB00881 | Quinapril                                                                                                                                                   | -0.075 | 0.392  | -0.629 | 0.141  | -0.412 | 0.588 | 0.813 | 0.053 | 0.36  | 0.267 |
| DB00421 | Spiroonolactone                                                                                                                                             | -0.074 | 0.709  | 0.957  | -0.111 | -0.822 | 0.371 | 0.755 | 0.787 | 0.388 | 0.148 |
| DB00158 | Folic acid                                                                                                                                                  | -0.073 | 0.174  | 0.715  | 0.105  | -0.498 | 0.64  | 0.742 | 0.834 | 0.65  | 0.35  |
| DB01727 | Isocitric Acid                                                                                                                                              | -0.072 | 0.141  | 0.996  | -0.081 | -0.454 | 0.626 | 0.689 | 0.787 | 0.256 | 0.24  |
| DB00243 | Ranolazine                                                                                                                                                  | -0.069 | 0.306  | 0.639  | 0.802  | -0.723 | 0.467 | 0.618 | 0.629 | 0.674 | 0.161 |
| DB01583 | Liotrix                                                                                                                                                     | -0.069 | 0.848  | -0.078 | -0.704 | -1     | 0.455 | 0.789 | 0.139 | 0.182 | 0.113 |
| DB03176 | KB-141                                                                                                                                                      | -0.069 | 0.848  | -0.078 | -0.704 | -1     | 0.455 | 0.789 | 0.139 | 0.182 | 0.113 |
| DB07425 | Sobetirome                                                                                                                                                  | -0.069 | 0.848  | -0.078 | -0.704 | -1     | 0.455 | 0.789 | 0.139 | 0.182 | 0.113 |
| DB07267 | 2-(6-methylpyridin-2-yl)-N-pyridin-4-ylquinazolin-4-amine                                                                                                   | -0.068 | -0.385 | 0.695  | 0.97   | -0.215 | 0.358 | 0.251 | 0.425 | 0.777 | 0.285 |
| DB08393 | 2-[(5,6-DIPHENYLFURO[2,3-D]PYRIMIDIN-4-YL)AMINO]ETHANOL                                                                                                     | -0.068 | 0.402  | 0.695  | -1.118 | -0.513 | 0.358 | 0.628 | 0.425 | 0.082 | 0.191 |
| DB00950 | Fexofenadine                                                                                                                                                | -0.064 | 0.143  | -0.292 | 0.626  | -0.545 | 0.484 | 0.597 | 0.257 | 0.66  | 0.208 |
| DB02701 | Nicotinamide                                                                                                                                                | -0.064 | -0.466 | -1.532 | 0.543  | 0.266  | 0.368 | 0.243 | 0.055 | 0.652 | 0.544 |
| DB01222 | Budesonide                                                                                                                                                  | -0.062 | 0.295  | -0.817 | -0.2   | 0.151  | 0.379 | 0.554 | 0.132 | 0.356 | 0.472 |

|         |                                                                                                                                           |        |        |        |        |        |       |       |       |       |       |
|---------|-------------------------------------------------------------------------------------------------------------------------------------------|--------|--------|--------|--------|--------|-------|-------|-------|-------|-------|
| DB01121 | Phenacemide                                                                                                                               | -0.061 | 0.212  | -0.027 | -0.939 | -0.332 | 0.382 | 0.448 | 0.395 | 0.296 | 0.345 |
| DB01579 | Phendimetrazine                                                                                                                           | -0.061 | -0.056 | 0.991  | -0.005 | -0.986 | 0.487 | 0.47  | 0.773 | 0.268 | 0.076 |
| DB02546 | Vorinostat                                                                                                                                | -0.053 | 0.303  | -0.209 | -0.374 | 0.192  | 0.416 | 0.62  | 0.359 | 0.371 | 0.535 |
| DB09236 | Lacidipine                                                                                                                                | -0.052 | 1.207  | 1.131  | 0.538  | -1.744 | 0.474 | 0.894 | 0.8   | 0.563 | 0.02  |
| DB00451 | Levothyroxine                                                                                                                             | -0.047 | -0.077 | 0.756  | 0.544  | 0.022  | 0.432 | 0.412 | 0.568 | 0.64  | 0.429 |
| DB01119 | Diazoxide                                                                                                                                 | -0.047 | -0.211 | 1.951  | -0.234 | -0.875 | 0.443 | 0.368 | 0.957 | 0.314 | 0.149 |
| DB00607 | Nafcillin                                                                                                                                 | -0.046 | 0.561  | -0.409 | -0.684 | -0.11  | 0.5   | 0.735 | 0.063 | 0.13  | 0.387 |
| DB07728 | 2-[2-(2-FLUOROPHENYL)PYRIDIN-4-YL]-<br>1,5,6,7-TETRAHYDRO-4H-PYRROLO[3,2-<br>C]PYRIDIN-4-ONE                                              | -0.046 | -0.463 | 0.781  | -0.284 | 0.492  | 0.359 | 0.229 | 0.493 | 0.304 | 0.644 |
| DB06742 | Ambroxol                                                                                                                                  | -0.045 | 0.438  | -0.882 | -0.427 | -0.126 | 0.364 | 0.632 | 0.129 | 0.238 | 0.321 |
| DB00331 | Metformin                                                                                                                                 | -0.044 | 0.369  | -0.076 | -0.183 | -0.115 | 0.368 | 0.604 | 0.323 | 0.338 | 0.336 |
| DB01032 | Probenecid                                                                                                                                | -0.044 | 0.355  | 1.214  | -1.118 | -0.646 | 0.407 | 0.582 | 0.81  | 0.112 | 0.193 |
| DB01977 | 6-(N-Phenylcarbamyl)-2-<br>Naphthalenecarboxamidine                                                                                       | -0.042 | 0.31   | 0.617  | -0.113 | -0.49  | 0.448 | 0.572 | 0.588 | 0.296 | 0.226 |
| DB07718 | 3-(4-HYDROXY-PHENYL)PYRUVIC ACID                                                                                                          | -0.042 | 0.084  | 0.566  | 0.385  | -0.267 | 0.53  | 0.563 | 0.59  | 0.419 | 0.331 |
| DB09017 | Brotizolam                                                                                                                                | -0.042 | 0.088  | -1.176 | -0.668 | 0.415  | 0.37  | 0.486 | 0.068 | 0.16  | 0.622 |
| DB09389 | Norgestrel                                                                                                                                | -0.042 | 0.112  | -1.033 | -0.753 | 0.257  | 0.388 | 0.477 | 0.074 | 0.142 | 0.514 |
| DB04840 | Debrisoquine                                                                                                                              | -0.04  | 0.155  | 1.218  | 0.709  | -0.295 | 0.606 | 0.67  | 0.835 | 0.597 | 0.345 |
| DB02873 | 1-(2,6-Dichlorophenyl)-5-(2,4-<br>Difluorophenyl)-7-Piperazin-1-Yl-3,4-<br>Dihydroquinazolin-2(1h)-One                                    | -0.038 | -0.348 | 0.469  | 0.394  | -0.246 | 0.379 | 0.284 | 0.335 | 0.555 | 0.271 |
| DB08941 | Isoxsuprine                                                                                                                               | -0.038 | 0.067  | -1.06  | 0.237  | 0.077  | 0.429 | 0.506 | 0.075 | 0.48  | 0.453 |
| DB00153 | Ergocalciferol                                                                                                                            | -0.037 | 0.328  | -1.273 | -0.346 | 0.327  | 0.376 | 0.573 | 0.057 | 0.275 | 0.525 |
| DB07227 | 4-[(5-{[4-(3-CHLOROPHENYL)-3-<br>OXOPIPERAZIN-1-YL]METHYL}-1H-<br>IMIDAZOL-1-YL)METHYL]BENZONITRILE                                       | -0.036 | 1.264  | 1.627  | 0.573  | -1.981 | 0.479 | 0.906 | 0.873 | 0.469 | 0.009 |
| DB00567 | Cephalexin                                                                                                                                | -0.034 | 0.145  | 1.278  | 0.698  | -0.227 | 0.567 | 0.629 | 0.873 | 0.603 | 0.379 |
| DB01076 | Atorvastatin                                                                                                                              | -0.034 | -0.092 | 0.28   | -0.074 | 0.586  | 0.371 | 0.363 | 0.521 | 0.4   | 0.686 |
| DB08799 | Antazoline                                                                                                                                | -0.034 | 0.444  | -0.715 | 0.003  | -0.479 | 0.688 | 0.859 | 0.048 | 0.362 | 0.236 |
| DB00824 | Enprofylline                                                                                                                              | -0.033 | 0.37   | -1.044 | 0.224  | -0.287 | 0.451 | 0.608 | 0.03  | 0.316 | 0.296 |
| DB01001 | Salbutamol                                                                                                                                | -0.033 | 0.297  | -1.716 | 0.649  | -0.572 | 0.445 | 0.567 | 0.021 | 0.643 | 0.217 |
| DB06994 | (2S,3S)-3-{3-[2-chloro-4-<br>(methylsulfonyl)phenyl]-1,2,4-oxadiazol-<br>5-yl}-1-cyclopentylidene-4-cyclopropyl-1-<br>fluorobutan-2-amine | -0.032 | 0.143  | 0.227  | 0.161  | -0.445 | 0.545 | 0.628 | 0.447 | 0.307 | 0.251 |
| DB00194 | Vidarabine                                                                                                                                | -0.027 | 1.147  | -2.496 | -0.41  | 0.084  | 0.397 | 0.892 | 0.01  | 0.283 | 0.458 |
| DB00406 | Gentian violet cation                                                                                                                     | -0.027 | 0.531  | 0.54   | 1.406  | -0.89  | 0.391 | 0.665 | 0.658 | 0.914 | 0.124 |
| DB01766 | Beta-(2-Naphthyl)-Alanine                                                                                                                 | -0.027 | -0.208 | 1.33   | -0.692 | 0.869  | 0.356 | 0.334 | 0.9   | 0.168 | 0.788 |
| DB04464 | N-Formylmethionine                                                                                                                        | -0.026 | 0.667  | -0.372 | 0.253  | -1.427 | 0.403 | 0.74  | 0.26  | 0.529 | 0.067 |
| DB00631 | Clofarabine                                                                                                                               | -0.025 | 1.074  | -1.369 | -0.918 | -0.178 | 0.443 | 0.822 | 0.058 | 0.121 | 0.342 |
| DB02352 | 3-(Benzyloxy)Pyridin-2-Amine                                                                                                              | -0.024 | -0.428 | 0.601  | -0.078 | 0.176  | 0.387 | 0.248 | 0.408 | 0.361 | 0.462 |
| DB00484 | Brimonidine                                                                                                                               | -0.023 | -0.229 | 2.934  | 0.281  | -1.12  | 0.452 | 0.342 | 0.989 | 0.361 | 0.087 |
| DB00762 | Irinotecan                                                                                                                                | -0.021 | -0.172 | 0.237  | -1.084 | 0.322  | 0.397 | 0.362 | 0.5   | 0.099 | 0.577 |
| DB01212 | Ceftriaxone                                                                                                                               | -0.021 | 0.465  | 1.159  | -0.049 | -0.689 | 0.468 | 0.642 | 0.807 | 0.353 | 0.191 |
| DB01761 | 4-[5-[2-(1-Phenyl-Ethylamino)-Pyrimidin-<br>4-Yl]-1-Methyl-4-(3-<br>Trifluoromethylphenyl)-1h-Imidazol-2-Yl]-<br>Piperidine               | -0.019 | -0.723 | 0.654  | 0.858  | -0.016 | 0.365 | 0.144 | 0.398 | 0.749 | 0.383 |
| DB01166 | Cilostazol                                                                                                                                | -0.018 | 0.983  | 1.828  | 0.053  | -1.758 | 0.546 | 0.899 | 0.929 | 0.281 | 0.005 |
| DB00953 | Rizatriptan                                                                                                                               | -0.017 | -0.696 | 1.635  | 1.354  | 0.259  | 0.453 | 0.184 | 0.908 | 0.881 | 0.529 |
| DB04059 | 8-(Pyrimidin-2-Ylamino)Naphthalene-2-<br>Carboximidamide                                                                                  | -0.017 | 0.418  | 0.29   | 0.274  | -0.198 | 0.454 | 0.605 | 0.42  | 0.508 | 0.352 |
| DB08612 | 1,1,1-TRIFLUORO-3-<br>(OCTYLTHIO)ACETONE                                                                                                  | -0.015 | 0.201  | 0.091  | -0.573 | -0.114 | 0.721 | 0.721 | 0.573 | 0.227 | 0.651 |

|         |                                                                                                           |        |        |        |        |        |       |       |       |       |       |
|---------|-----------------------------------------------------------------------------------------------------------|--------|--------|--------|--------|--------|-------|-------|-------|-------|-------|
| DB00136 | Calcitriol                                                                                                | -0.012 | 0.624  | 0.77   | 0.719  | -1.225 | 0.454 | 0.681 | 0.652 | 0.589 | 0.076 |
| DB08890 | Linaclotide                                                                                               | -0.012 | 0.026  | 0.349  | -0.095 | -0.257 | 0.386 | 0.396 | 0.488 | 0.397 | 0.349 |
| DB00143 | Glutathione                                                                                               | -0.01  | -0.466 | 0.428  | 0.543  | 0.034  | 0.45  | 0.247 | 0.708 | 0.658 | 0.433 |
| DB01188 | Ciclopirox                                                                                                | -0.01  | -0.141 | -1.688 | -0.642 | 0.508  | 0.378 | 0.37  | 0.051 | 0.252 | 0.678 |
| DB03541 | 10-Propargyl-5,8-Dideazafolic Acid                                                                        | -0.01  | 0.328  | 1.054  | -0.034 | -0.538 | 0.641 | 0.756 | 0.798 | 0.286 | 0.207 |
| DB04719 | DIMETHYL-(4,5,6,7-TETRABROMO-1H-BENZOIMIDAZOL-2-YL)-AMINE                                                 | -0.009 | -0.034 | -0.155 | -1.425 | -0.411 | 0.395 | 0.386 | 0.261 | 0.044 | 0.249 |
| DB07149 | (7S)-2-(2-aminopyrimidin-4-yl)-7-(2-fluoroethyl)-1,5,6,7-tetrahydro-4H-pyrrolo[3,2-c]pyridin-4-one        | -0.009 | -0.291 | 0.08   | -1.348 | 0.604  | 0.371 | 0.273 | 0.418 | 0.054 | 0.699 |
| DB00744 | Zileuton                                                                                                  | -0.006 | -0.056 | 0.804  | 0.848  | -0.507 | 0.486 | 0.429 | 0.701 | 0.706 | 0.228 |
| DB01177 | Idarubicin                                                                                                | -0.004 | -0.804 | -0.585 | -0.685 | 0.294  | 0.417 | 0.129 | 0.203 | 0.187 | 0.545 |
| DB00151 | L-Cysteine                                                                                                | -0.003 | 0.236  | -0.589 | -0.82  | 0.417  | 0.462 | 0.535 | 0.143 | 0.144 | 0.588 |
| DB00296 | Ropivacaine                                                                                               | 0.001  | 0.125  | 1.618  | 1.255  | -0.712 | 0.512 | 0.503 | 0.911 | 0.863 | 0.178 |
| DB00961 | Mepivacaine                                                                                               | 0.001  | 0.125  | 1.618  | 1.255  | -0.712 | 0.512 | 0.503 | 0.911 | 0.863 | 0.178 |
| DB01086 | Benzocaine                                                                                                | 0.001  | 0.125  | 1.618  | 1.255  | -0.712 | 0.512 | 0.503 | 0.911 | 0.863 | 0.178 |
| DB06603 | Panobinostat                                                                                              | 0.002  | -0.018 | 0.741  | -0.193 | 0.436  | 0.406 | 0.406 | 0.634 | 0.372 | 0.644 |
| DB08696 |                                                                                                           | 0.003  | 1.035  | 1.083  | 0.162  | -0.739 | 0.475 | 0.817 | 0.785 | 0.416 | 0.168 |
| DB06730 | Gestodene                                                                                                 | 0.004  | 0.151  | -1.011 | -0.712 | 0.27   | 0.37  | 0.484 | 0.073 | 0.158 | 0.505 |
| DB00201 | Caffeine                                                                                                  | 0.009  | -0.265 | -1.679 | 0.47   | 0.37   | 0.405 | 0.318 | 0.031 | 0.642 | 0.591 |
| DB01509 | Tenamfetamine                                                                                             | 0.009  | 0.355  | 0.397  | -0.223 | -0.561 | 0.644 | 0.747 | 0.575 | 0.201 | 0.191 |
| DB08800 | Chloropyramine                                                                                            | 0.01   | 0.521  | -0.269 | -0.673 | 0.23   | 0.502 | 0.71  | 0.14  | 0.168 | 0.547 |
| DB00711 | Diethylcarbamazine                                                                                        | 0.011  | 0.306  | -0.399 | -1.223 | 0.869  | 0.38  | 0.56  | 0.268 | 0.073 | 0.792 |
| DB00997 | Doxorubicin                                                                                               | 0.013  | 0.067  | 0.769  | -1.948 | 0.064  | 0.421 | 0.467 | 0.687 | 0.025 | 0.457 |
| DB00547 | Desoximetasone                                                                                            | 0.014  | 0.26   | -0.919 | -0.834 | 0.198  | 0.4   | 0.56  | 0.137 | 0.153 | 0.511 |
| DB00959 | Methylprednisolone                                                                                        | 0.014  | 0.26   | -0.919 | -0.834 | 0.198  | 0.4   | 0.56  | 0.137 | 0.153 | 0.511 |
| DB03466 | BMS184394                                                                                                 | 0.014  | 0.865  | 1.579  | 0.406  | -1.715 | 0.551 | 0.866 | 0.887 | 0.407 | 0.011 |
| DB04865 | Omacetaxine mepesuccinate                                                                                 | 0.014  | 0.343  | -0.712 | -0.422 | 0.541  | 0.365 | 0.563 | 0.189 | 0.256 | 0.673 |
| DB01087 | Primaquine                                                                                                | 0.016  | -0.185 | -0.73  | 0.03   | -0.083 | 0.459 | 0.353 | 0.163 | 0.45  | 0.397 |
| DB00619 | Imatinib                                                                                                  | 0.017  | -0.032 | 1.005  | 0.674  | -0.793 | 0.414 | 0.39  | 0.806 | 0.753 | 0.152 |
| DB00465 | Ketorolac                                                                                                 | 0.018  | 0.193  | 1.381  | 0.773  | -0.826 | 0.413 | 0.5   | 0.873 | 0.689 | 0.122 |
| DB06989 | {4-[2-BENZYL-3-METHOXY-2-(METHOXYCARBONYL)-3-OXOPROPYL]PHENYL}SULFAMIC ACID                               | 0.019  | 0.555  | -0.076 | -0.013 | -0.425 | 0.487 | 0.683 | 0.138 | 0.345 | 0.255 |
| DB07207 | 2-(4-HYDROXY-5-PHENYL-1H-PYRAZOL-3-YL)-1H-BENZOIMIDAZOLE-5-CARBOXAMIDINE                                  | 0.019  | 0.319  | 1.092  | 0.26   | -0.823 | 0.543 | 0.672 | 0.798 | 0.35  | 0.13  |
| DB09115 | Diiodohydroxyquinoline                                                                                    | 0.022  | 0.404  | 0.065  | -1.162 | -0.534 | 0.405 | 0.604 | 0.443 | 0.078 | 0.193 |
| DB01821 | L-N(Omega)-Nitroarginine-2,4-L-Diaminobutyric Amide                                                       | 0.024  | 0.153  | 1.36   | 0.435  | -0.91  | 0.606 | 0.623 | 0.866 | 0.438 | 0.1   |
| DB02027 | N-((4s)-4-Amino-5-[(2-Aminoethyl)Amino]Pentyl)-N'-Nitroguanidine                                          | 0.024  | 0.153  | 1.36   | 0.435  | -0.91  | 0.606 | 0.623 | 0.866 | 0.438 | 0.1   |
| DB02077 | L-N(omega)-Nitroarginine-(4R)-Amino-L-Proline Amide                                                       | 0.024  | 0.153  | 1.36   | 0.435  | -0.91  | 0.606 | 0.623 | 0.866 | 0.438 | 0.1   |
| DB02141 | S,S'-(1,4-Phenylene-Bis(1,2-Ethanediy))Bis-Isothiurea                                                     | 0.024  | 0.153  | 1.36   | 0.435  | -0.91  | 0.606 | 0.623 | 0.866 | 0.438 | 0.1   |
| DB03707 | S-Ethyl-N-Phenyl-Isothiurea                                                                               | 0.024  | 0.153  | 1.36   | 0.435  | -0.91  | 0.606 | 0.623 | 0.866 | 0.438 | 0.1   |
| DB04018 | S-Isopropyl-Isothiurea                                                                                    | 0.024  | 0.153  | 1.36   | 0.435  | -0.91  | 0.606 | 0.623 | 0.866 | 0.438 | 0.1   |
| DB07107 | (1S)-2-(1H-INDOL-3-YL)-1-[(5-[(E)-2-PYRIDIN-4-YLVINYLYL]PYRIDIN-3-YL)OXY]METHYL]ETHYLAMINE                | 0.024  | -0.425 | 0.074  | -0.221 | 0.356  | 0.404 | 0.217 | 0.361 | 0.338 | 0.566 |
| DB08018 | N-((3S,4S)-4-[(6-AMINO-4-METHYLPYRIDIN-2-YL)METHYL]PYRROLIDIN-3-YL)-N'-(4-CHLOROBENZYL)ETHANE-1,2-DIAMINE | 0.024  | 0.153  | 1.36   | 0.435  | -0.91  | 0.606 | 0.623 | 0.866 | 0.438 | 0.1   |

|         |                                                                                                           |       |        |        |        |        |       |       |       |       |       |
|---------|-----------------------------------------------------------------------------------------------------------|-------|--------|--------|--------|--------|-------|-------|-------|-------|-------|
| DB08019 | N-((3R,4S)-4-[(6-amino-4-methylpyridin-2-yl)methyl]pyrrolidin-3-yl)-N'-(3-chlorobenzyl)ethane-1,2-diamine | 0.024 | 0.153  | 1.36   | 0.435  | -0.91  | 0.606 | 0.623 | 0.866 | 0.438 | 0.1   |
| DB04854 | Febuxostat                                                                                                | 0.025 | 0.086  | -1.135 | -0.506 | 0.625  | 0.384 | 0.454 | 0.062 | 0.203 | 0.722 |
| DB04821 | Nomifensine                                                                                               | 0.026 | 0.907  | -1.414 | -0.534 | -0.801 | 0.465 | 0.778 | 0.034 | 0.176 | 0.153 |
| DB01082 | Streptomycin                                                                                              | 0.028 | 0.318  | 0.121  | -1.211 | -0.339 | 0.577 | 0.562 | 0.531 | 0.019 | 0.522 |
| DB03865 | 6-Chloro-2-(2-Hydroxy-Biphenyl-3-Yl)-1h-Indole-5-Carboxamide                                              | 0.028 | 0.172  | -0.253 | -0.427 | -0.163 | 0.481 | 0.505 | 0.136 | 0.272 | 0.33  |
| DB02175 | Malonic acid                                                                                              | 0.03  | 0.483  | 0.599  | -0.559 | -0.506 | 0.399 | 0.672 | 0.373 | 0.19  | 0.196 |
| DB02925 | Piretanide                                                                                                | 0.031 | 0.411  | 1.37   | 0.09   | -0.771 | 0.473 | 0.635 | 0.852 | 0.401 | 0.158 |
| DB04832 | Zimelidine                                                                                                | 0.031 | 0.461  | 1.263  | -0.052 | -0.975 | 0.563 | 0.744 | 0.836 | 0.241 | 0.08  |
| DB09216 | Tolfenamic Acid                                                                                           | 0.031 | -0.062 | -0.048 | -0.58  | 0.584  | 0.421 | 0.394 | 0.353 | 0.196 | 0.676 |
| DB00247 | Methysergide                                                                                              | 0.032 | -1.295 | 1.976  | 1.393  | 1.167  | 0.478 | 0.078 | 0.969 | 0.896 | 0.853 |
| DB00756 | Hexachlorophene                                                                                           | 0.032 | 0.829  | 0.122  | 1.066  | -0.871 | 0.426 | 0.778 | 0.503 | 0.838 | 0.145 |
| DB00380 | Dexrazoxane                                                                                               | 0.034 | -0.137 | 1.236  | -0.392 | 1.186  | 0.467 | 0.397 | 0.865 | 0.268 | 0.838 |
| DB01167 | Itraconazole                                                                                              | 0.035 | -0.043 | -0.436 | -0.125 | 0.058  | 0.409 | 0.407 | 0.211 | 0.376 | 0.417 |
| DB07297 | 5,6-DIPHENYL-N-(2-PIPERAZIN-1-YLETHYL)FURO[2,3-D]PYRIMIDIN-4-AMINE                                        | 0.035 | 0.896  | 0.356  | -0.12  | -0.527 | 0.477 | 0.766 | 0.247 | 0.354 | 0.237 |
| DB00224 | Indinavir                                                                                                 | 0.038 | 0.526  | 0.142  | 0.269  | -0.248 | 0.686 | 0.823 | 0.464 | 0.501 | 0.355 |
| DB02424 | Geldanamycin                                                                                              | 0.038 | -0.364 | -0.983 | -0.208 | 0.545  | 0.413 | 0.247 | 0.117 | 0.311 | 0.633 |
| DB02550 | 8-(2-Chloro-3,4,5-Trimethoxy-Benzyl)-2-Fluoro-9-Pent-4-Ylnyl-9h-Purin-6-Ylamine                           | 0.038 | -0.364 | -0.983 | -0.208 | 0.545  | 0.413 | 0.247 | 0.117 | 0.311 | 0.633 |
| DB02754 | 9-Butyl-8-(3,4,5-Trimethoxybenzyl)-9h-Purin-6-Amine                                                       | 0.038 | -0.364 | -0.983 | -0.208 | 0.545  | 0.413 | 0.247 | 0.117 | 0.311 | 0.633 |
| DB02840 | 4-(1,3-Benzodioxol-5-Yl)-5-(5-Ethyl-2,4-Dihydroxyphenyl)-2h-Pyrazole-3-Carboxylic Acid                    | 0.038 | -0.364 | -0.983 | -0.208 | 0.545  | 0.413 | 0.247 | 0.117 | 0.311 | 0.633 |
| DB03749 | 4-(1h-Imidazol-4-Yl)-3-(5-Ethyl-2,4-Dihydroxy-Phenyl)-1h-Pyrazole                                         | 0.038 | -0.364 | -0.983 | -0.208 | 0.545  | 0.413 | 0.247 | 0.117 | 0.311 | 0.633 |
| DB04588 | N-[4-(AMINOSULFONYL)BENZYL]-5-(5-CHLORO-2,4-DIHYDROXYPHENYL)-1H-PYRAZOLE-4-CARBOXAMIDE                    | 0.038 | -0.364 | -0.983 | -0.208 | 0.545  | 0.413 | 0.247 | 0.117 | 0.311 | 0.633 |
| DB06956 | N-(4-ACETYLPHENYL)-5-(5-CHLORO-2,4-DIHYDROXYPHENYL)-1H-PYRAZOLE-4-CARBOXAMIDE                             | 0.038 | -0.364 | -0.983 | -0.208 | 0.545  | 0.413 | 0.247 | 0.117 | 0.311 | 0.633 |
| DB06957 | 4-CHLORO-6-(4-[4-(METHYLSULFONYL)BENZYL]PIPERAZIN-1-YL)-1H-PYRAZOL-5-YL)BENZENE-1,3-DIOL                  | 0.038 | -0.364 | -0.983 | -0.208 | 0.545  | 0.413 | 0.247 | 0.117 | 0.311 | 0.633 |
| DB06961 | 5-(5-chloro-2,4-dihydroxyphenyl)-N-ethyl-4-[4-(morpholin-4-ylmethyl)phenyl]isoxazole-3-carboxamide        | 0.038 | -0.364 | -0.983 | -0.208 | 0.545  | 0.413 | 0.247 | 0.117 | 0.311 | 0.633 |
| DB06964 | 5-(5-CHLORO-2,4-DIHYDROXYPHENYL)-N-ETHYL-4-(4-METHOXYPHENYL)ISOXAZOLE-3-CARBOXAMIDE                       | 0.038 | -0.364 | -0.983 | -0.208 | 0.545  | 0.413 | 0.247 | 0.117 | 0.311 | 0.633 |
| DB06969 | 2-amino-4-[2,4-dichloro-5-(2-pyrrolidin-1-ylethoxy)phenyl]-N-ethylthieno[2,3-d]pyrimidine-6-carboxamide   | 0.038 | -0.364 | -0.983 | -0.208 | 0.545  | 0.413 | 0.247 | 0.117 | 0.311 | 0.633 |
| DB07495 | 5-(5-CHLORO-2,4-DIHYDROXYPHENYL)-N-ETHYL-4-(4-METHOXYPHENYL)-1H-PYRAZOLE-3-CARBOXAMIDE                    | 0.038 | -0.364 | -0.983 | -0.208 | 0.545  | 0.413 | 0.247 | 0.117 | 0.311 | 0.633 |

|         |                                                                                           |       |        |        |        |        |       |       |       |       |       |
|---------|-------------------------------------------------------------------------------------------|-------|--------|--------|--------|--------|-------|-------|-------|-------|-------|
| DB07594 | 4-[4-(2,3-DIHYDRO-1,4-BENZODIOXIN-6-YL)-3-METHYL-1H-PYRAZOL-5-YL]-6-ETHYLBENZENE-1,3-DIOL | 0.038 | -0.364 | -0.983 | -0.208 | 0.545  | 0.413 | 0.247 | 0.117 | 0.311 | 0.633 |
| DB07601 | 4-chloro-6-{5-[(2-morpholin-4-ylethyl)amino]-1,2-benzisoxazol-3-yl}benzene-1,3-diol       | 0.038 | -0.364 | -0.983 | -0.208 | 0.545  | 0.413 | 0.247 | 0.117 | 0.311 | 0.633 |
| DB07877 | 8-(6-BROMO-BENZO[1,3]DIOXOL-5-YLSULFANYL)-9-(3-ISOPROPYLAMINO-PROPYL)-ADENINE             | 0.038 | -0.364 | -0.983 | -0.208 | 0.545  | 0.413 | 0.247 | 0.117 | 0.311 | 0.633 |
| DB08787 | 4-(2,4-dichlorophenyl)-5-phenyldiazenylpyrimidin-2-amine                                  | 0.038 | -0.364 | -0.983 | -0.208 | 0.545  | 0.413 | 0.247 | 0.117 | 0.311 | 0.633 |
| DB08788 | 3,6-DIAMINO-5-CYANO-4-(4-ETHOXYPHENYL)THIENO[2,3-B]PYRIDINE-2-CARBOXAMIDE                 | 0.038 | -0.364 | -0.983 | -0.208 | 0.545  | 0.413 | 0.247 | 0.117 | 0.311 | 0.633 |
| DB08789 | 2-AMINO-4-(2,4-DICHLOROPHENYL)-N-ETHYLTHIENO[2,3-D]PYRIMIDINE-6-CARBOXAMIDE               | 0.038 | -0.364 | -0.983 | -0.208 | 0.545  | 0.413 | 0.247 | 0.117 | 0.311 | 0.633 |
| DB00384 | Triamterene                                                                               | 0.039 | 0.554  | 0.099  | -1.087 | -0.244 | 0.427 | 0.687 | 0.439 | 0.095 | 0.313 |
| DB00131 | Adenosine phosphate                                                                       | 0.043 | 0.511  | -0.767 | -0.338 | -0.318 | 0.436 | 0.66  | 0.19  | 0.298 | 0.29  |
| DB01599 | Probucol                                                                                  | 0.043 | 0.236  | 1.263  | 0.875  | -0.562 | 0.526 | 0.559 | 0.824 | 0.71  | 0.229 |
| DB05109 | Trabectedin                                                                               | 0.043 | 0.384  | 0.411  | 0.237  | -0.41  | 0.471 | 0.686 | 0.328 | 0.48  | 0.224 |
| DB00440 | Trimethoprim                                                                              | 0.044 | 0.912  | 0.056  | 0.274  | -0.576 | 0.47  | 0.784 | 0.322 | 0.521 | 0.221 |
| DB00698 | Nitrofurantoin                                                                            | 0.044 | 0.17   | -1.068 | -0.437 | 0.658  | 0.397 | 0.498 | 0.078 | 0.229 | 0.721 |
| DB07676 | 3-(((3S)-3,4-dihydroxybutyl)oxy)amino)-1H,2'H-2,3'-biindol-2'-one                         | 0.044 | -0.356 | 1.323  | 0.92   | 0.094  | 0.397 | 0.255 | 0.905 | 0.749 | 0.433 |
| DB00509 | Dextrothyroxine                                                                           | 0.052 | 1.149  | 0.342  | -0.313 | -0.98  | 0.481 | 0.865 | 0.411 | 0.256 | 0.122 |
| DB02998 | Metribolone                                                                               | 0.052 | 0.059  | -0.747 | -0.323 | 0.614  | 0.408 | 0.448 | 0.098 | 0.286 | 0.706 |
| DB09223 | Blonanserin                                                                               | 0.053 | 0.421  | 2.557  | 0.214  | -1.478 | 0.555 | 0.69  | 0.974 | 0.33  | 0.025 |
| DB07050 | 5-[(phenylsulfonyl)amino]-1,3,4-thiadiazole-2-sulfonamide                                 | 0.056 | 0.702  | 1.297  | -1.676 | -1.055 | 0.496 | 0.721 | 0.84  | 0.043 | 0.111 |
| DB04083 | N'-Pyridoxyl-Lysine-5'-Monophosphate                                                      | 0.059 | 0.514  | 0.84   | 0.418  | -1.306 | 0.486 | 0.652 | 0.702 | 0.426 | 0.073 |
| DB01063 | Acetophenazine                                                                            | 0.06  | 0.322  | -1.067 | -0.427 | 0.682  | 0.406 | 0.579 | 0.063 | 0.213 | 0.713 |
| DB00466 | Picrotoxin                                                                                | 0.061 | 0.308  | 0.739  | 0.591  | -0.481 | 0.516 | 0.6   | 0.684 | 0.585 | 0.233 |
| DB00678 | Losartan                                                                                  | 0.064 | 0.804  | 0.742  | 0.538  | -0.658 | 0.505 | 0.758 | 0.67  | 0.461 | 0.178 |
| DB02473 | 6-[N-(1-Isopropyl-3,4-Dihydro-7-Isoquinoliny)Carbamyl]-2-Naphthalenecarboxamide           | 0.064 | 0.217  | 0.715  | -0.37  | -0.164 | 0.488 | 0.521 | 0.632 | 0.288 | 0.336 |
| DB07076 | 6-[(Z)-AMINO(IMINO)METHYL]-N-[3-(CYCLOPENTYLOXY)PHENYL]-2-NAPHTHAMIDE                     | 0.064 | 0.217  | 0.715  | -0.37  | -0.164 | 0.488 | 0.521 | 0.632 | 0.288 | 0.336 |
| DB00803 | Colistin                                                                                  | 0.067 | 0.781  | 1.644  | 0.458  | -0.291 | 0.412 | 0.796 | 0.932 | 0.621 | 0.269 |
| DB00504 | Levallorphan                                                                              | 0.068 | 0.559  | -0.525 | 0.369  | -0.376 | 0.759 | 0.853 | 0.066 | 0.482 | 0.331 |
| DB00913 | Anileridine                                                                               | 0.068 | 0.559  | -0.525 | 0.369  | -0.376 | 0.759 | 0.853 | 0.066 | 0.482 | 0.331 |
| DB01466 | Ethylmorphine                                                                             | 0.068 | 0.559  | -0.525 | 0.369  | -0.376 | 0.759 | 0.853 | 0.066 | 0.482 | 0.331 |
| DB01501 | Difenoxin                                                                                 | 0.068 | 0.559  | -0.525 | 0.369  | -0.376 | 0.759 | 0.853 | 0.066 | 0.482 | 0.331 |
| DB01551 | Dihydrocodeine                                                                            | 0.068 | 0.559  | -0.525 | 0.369  | -0.376 | 0.759 | 0.853 | 0.066 | 0.482 | 0.331 |
| DB09049 | Naloxegol                                                                                 | 0.068 | 0.559  | -0.525 | 0.369  | -0.376 | 0.759 | 0.853 | 0.066 | 0.482 | 0.331 |
| DB00328 | Indometacin                                                                               | 0.069 | 0.039  | -0.367 | 0.454  | 0.758  | 0.459 | 0.441 | 0.273 | 0.617 | 0.757 |
| DB00768 | Olopatadine                                                                               | 0.069 | 0.289  | -1.038 | 0.989  | 0.143  | 0.476 | 0.553 | 0.048 | 0.76  | 0.46  |
| DB01098 | Rosuvastatin                                                                              | 0.069 | 0.231  | 1.15   | 0.32   | -0.673 | 0.556 | 0.609 | 0.809 | 0.377 | 0.176 |
| DB04895 | Pegaptanib                                                                                | 0.069 | 0.317  | 0.599  | 0.533  | -0.59  | 0.577 | 0.661 | 0.604 | 0.459 | 0.21  |
| DB06843 | 2',5'-DIDEOXY-ADENOSINE 3'-MONOPHOSPHATE                                                  | 0.071 | 0.378  | 0.687  | 0.293  | -0.615 | 0.673 | 0.739 | 0.663 | 0.425 | 0.185 |
| DB13149 | Protein S human                                                                           | 0.071 | 0.39   | 1.866  | 0.028  | -0.615 | 0.65  | 0.739 | 0.928 | 0.262 | 0.183 |
| DB00113 | Technetium Tc-99m arcitumomab                                                             | 0.073 | 0.353  | 0.395  | -1.05  | 0.024  | 0.621 | 0.658 | 0.645 | 0.037 | 0.629 |
| DB00159 | Icosapent                                                                                 | 0.073 | -0.264 | 1.951  | 1.351  | -0.75  | 0.475 | 0.358 | 0.967 | 0.903 | 0.184 |

|         |                                                                                                                        |       |        |        |        |        |       |       |       |       |       |
|---------|------------------------------------------------------------------------------------------------------------------------|-------|--------|--------|--------|--------|-------|-------|-------|-------|-------|
| DB08356 | 4-[4-(4-methoxyphenyl)-5-methyl-1H-pyrazol-3-yl]benzene-1,3-diol                                                       | 0.073 | -0.287 | -1.007 | -0.156 | 0.62   | 0.428 | 0.295 | 0.108 | 0.326 | 0.7   |
| DB02491 | 4-[4-(1-Amino-1-Methylethyl)Phenyl]-5-Chloro-N-[4-(2-Morpholin-4-Ylethyl)Phenyl]Pyrimidin-2-Amine                      | 0.074 | -0.156 | -0.77  | 0.535  | 0.398  | 0.42  | 0.347 | 0.11  | 0.631 | 0.584 |
| DB05186 | SQ-109                                                                                                                 | 0.075 | 0.832  | 0.305  | 0.077  | -0.816 | 0.646 | 0.891 | 0.483 | 0.299 | 0.112 |
| DB07274 | N-cyclopropyl-6-[(6,7-dimethoxyquinolin-4-yl)oxy]naphthalene-1-carboxamide                                             | 0.078 | -0.162 | 0.345  | -0.618 | 0.534  | 0.417 | 0.343 | 0.464 | 0.215 | 0.667 |
| DB09020 | Bisacodyl                                                                                                              | 0.081 | 0.423  | -0.616 | -0.247 | 0.36   | 0.438 | 0.639 | 0.196 | 0.293 | 0.537 |
| DB00378 | Dydrogesterone                                                                                                         | 0.082 | 0.314  | -0.871 | -0.514 | 0.38   | 0.41  | 0.563 | 0.087 | 0.209 | 0.586 |
| DB01285 | Corticotropin                                                                                                          | 0.083 | 0.833  | 0.918  | -0.666 | -0.023 | 0.599 | 0.862 | 0.773 | 0.175 | 0.473 |
| DB04147 | Lauryl Dimethylamine-N-Oxide                                                                                           | 0.083 | 0.184  | -0.69  | -1.315 | -0.135 | 0.489 | 0.527 | 0.163 | 0.068 | 0.386 |
| DB00860 | Prednisolone                                                                                                           | 0.084 | 0.245  | -0.729 | -0.667 | 0.071  | 0.458 | 0.529 | 0.14  | 0.191 | 0.45  |
| DB00455 | Loratadine                                                                                                             | 0.085 | 1.035  | -0.307 | 1.199  | -1.264 | 0.48  | 0.81  | 0.227 | 0.819 | 0.07  |
| DB00400 | Griseofulvin                                                                                                           | 0.086 | 0.188  | -1.287 | -0.614 | 0.577  | 0.417 | 0.523 | 0.051 | 0.172 | 0.673 |
| DB00857 | Terbinafine                                                                                                            | 0.086 | 0.582  | 1.018  | -0.073 | -0.947 | 0.585 | 0.762 | 0.785 | 0.244 | 0.087 |
| DB07045 | (2R,3R,4S,5R)-2-[6-amino-8-[(3,4-dichlorophenyl)methylamino]purin-9-yl]-5-(hydroxymethyl)oxolane-3,4-diol              | 0.086 | -0.269 | 0.984  | 0.498  | -0.354 | 0.419 | 0.311 | 0.594 | 0.613 | 0.235 |
| DB04297 | 7-[4-(Dimethylamino)Phenyl]-N-Hydroxy-4,6-Dimethyl-7-Oxo-2,4-Heptadienamidine                                          | 0.087 | 0.056  | -0.126 | 0.123  | 0.777  | 0.442 | 0.429 | 0.362 | 0.492 | 0.749 |
| DB00665 | Nilutamide                                                                                                             | 0.089 | 0.216  | -1.016 | -0.858 | 0.732  | 0.44  | 0.511 | 0.073 | 0.133 | 0.758 |
| DB08553 | (1E)-5-(1-piperidin-4-yl-3-pyridin-4-yl-1H-pyrazol-4-yl)-2,3-dihydro-1H-inden-1-one oxime                              | 0.089 | 0.03   | 0.559  | 0.956  | -0.387 | 0.44  | 0.41  | 0.361 | 0.751 | 0.213 |
| DB07832 | 4-[4-[(5-hydroxy-2-methylphenyl)amino]quinolin-7-yl]-1,3-thiazole-2-carbaldehyde                                       | 0.09  | -0.15  | 0.801  | 0.337  | -0.516 | 0.42  | 0.363 | 0.485 | 0.553 | 0.181 |
| DB00590 | Doxazosin                                                                                                              | 0.092 | -0.127 | 0.352  | 0.9    | -0.814 | 0.506 | 0.403 | 0.532 | 0.749 | 0.15  |
| DB00739 | Hetacillin                                                                                                             | 0.092 | 0.357  | 1.533  | 0.407  | -0.943 | 0.58  | 0.701 | 0.889 | 0.426 | 0.081 |
| DB00990 | Exemestane                                                                                                             | 0.092 | 0.194  | -1.03  | -0.721 | 0.831  | 0.455 | 0.519 | 0.063 | 0.149 | 0.778 |
| DB02193 |                                                                                                                        | 0.095 | -0.013 | 0.445  | 0.409  | 0.252  | 0.584 | 0.488 | 0.559 | 0.382 | 0.551 |
| DB03136 | 4-Iodobenzo[B]Thiophene-2-Carboxamidine                                                                                | 0.095 | -0.013 | 0.445  | 0.409  | 0.252  | 0.584 | 0.488 | 0.559 | 0.382 | 0.551 |
| DB01614 | Acepromazine                                                                                                           | 0.097 | -0.078 | 1.685  | 0.954  | -1.685 | 0.482 | 0.418 | 0.91  | 0.658 | 0.042 |
| DB00413 | Pramipexole                                                                                                            | 0.101 | -0.402 | 2.644  | 2.179  | 0.038  | 0.489 | 0.288 | 0.992 | 0.99  | 0.421 |
| DB03649 | [[[(5-Chloro-2-Pyridinyl)Amino]Methylene]-1,1-Bisphosphonate                                                           | 0.101 | 0.517  | 1.299  | 0.188  | -0.808 | 0.635 | 0.815 | 0.844 | 0.336 | 0.112 |
| DB07215 | 2-METHYL-2-(4-[[[(4-METHYL-2-[4-(TRIFLUOROMETHYL)PHENYL]-1,3-THIAZOL-5-YL)CARBONYL]AMINO]METHYL)PHENOXY]PROPANOIC ACID | 0.101 | -0.155 | 1.357  | 1.747  | -1.091 | 0.494 | 0.39  | 0.91  | 0.901 | 0.106 |
| DB07724 | Indeglitazar                                                                                                           | 0.101 | -0.155 | 1.357  | 1.747  | -1.091 | 0.494 | 0.39  | 0.91  | 0.901 | 0.106 |
| DB01621 | Pipotiazine                                                                                                            | 0.105 | 0.301  | 1.663  | 0.324  | -1.021 | 0.539 | 0.58  | 0.9   | 0.352 | 0.099 |
| DB06404 | Human C1-esterase inhibitor                                                                                            | 0.105 | 0.281  | 0.899  | -0.172 | -0.147 | 0.506 | 0.551 | 0.728 | 0.257 | 0.335 |
| DB09228 | Conestat alfa                                                                                                          | 0.105 | 0.281  | 0.899  | -0.172 | -0.147 | 0.506 | 0.551 | 0.728 | 0.257 | 0.335 |
| DB00894 | Testolactone                                                                                                           | 0.107 | 0.289  | 0.817  | -0.948 | -0.222 | 0.532 | 0.53  | 0.668 | 0.159 | 0.478 |
| DB01217 | Anastrozole                                                                                                            | 0.107 | 0.289  | 0.817  | -0.948 | -0.222 | 0.532 | 0.53  | 0.668 | 0.159 | 0.478 |
| DB05773 | Trastuzumab emtansine                                                                                                  | 0.109 | 0.414  | 1.004  | 0.143  | -0.351 | 0.668 | 0.747 | 0.786 | 0.459 | 0.31  |
| DB06366 | Pertuzumab                                                                                                             | 0.109 | 0.414  | 1.004  | 0.143  | -0.351 | 0.668 | 0.747 | 0.786 | 0.459 | 0.31  |
| DB07073 | 5,5-dimethyl-2-morpholin-4-yl-5,6-dihydro-1,3-benzothiazol-7(4H)-one                                                   | 0.109 | 0.278  | 0.731  | 0.709  | -0.589 | 0.585 | 0.612 | 0.646 | 0.534 | 0.205 |

|         |                                                                                                                       |       |        |        |        |        |       |       |       |       |       |
|---------|-----------------------------------------------------------------------------------------------------------------------|-------|--------|--------|--------|--------|-------|-------|-------|-------|-------|
| DB07503 | (5E)-5-[(2,2-DIFLUORO-1,3-BENZODIOXOL-5-YL)METHYLENE]-1,3-THIAZOLIDINE-2,4-DIONE                                      | 0.109 | 0.278  | 0.731  | 0.709  | -0.589 | 0.585 | 0.612 | 0.646 | 0.534 | 0.205 |
| DB03383 | 5-Chloro-1h-Indole-2-Carboxylic Acid [1-(4-Fluorobenzyl)-2-(4-Hydroxypiperidin-1yl)-2-Oxoethyl]Amide                  | 0.112 | 0.715  | 0.588  | 0.55   | -1.3   | 0.532 | 0.734 | 0.583 | 0.457 | 0.059 |
| DB03597 | Gamma-Glutamyl[S-(2-Iodobenzyl)Cysteiny]Glycine                                                                       | 0.112 | 0.672  | -0.049 | 0.028  | -0.858 | 0.593 | 0.832 | 0.347 | 0.272 | 0.089 |
| DB04530 | S,S-(2-Hydroxyethyl)Thiocysteine                                                                                      | 0.113 | -0.167 | -0.368 | 0.206  | 0.352  | 0.464 | 0.347 | 0.258 | 0.488 | 0.564 |
| DB07812 | N-[(1S)-2-amino-1-phenylethyl]-5-(1H-pyrrolo[2,3-b]pyridin-4-yl)thiophene-2-carboxamide                               | 0.114 | -0.065 | 1.333  | 0.158  | 0.273  | 0.449 | 0.389 | 0.915 | 0.452 | 0.509 |
| DB01880 | 3,4-Dihydroxycinnamic Acid                                                                                            | 0.116 | -0.032 | 0.681  | -0.798 | -0.063 | 0.51  | 0.424 | 0.642 | 0.157 | 0.393 |
| DB01074 | Perhexiline                                                                                                           | 0.117 | 0.332  | 0.694  | 0.858  | -0.449 | 0.484 | 0.584 | 0.671 | 0.753 | 0.241 |
| DB06623 | Flupirtine                                                                                                            | 0.118 | -0.741 | 1.482  | 1.826  | 0.378  | 0.448 | 0.153 | 0.899 | 0.965 | 0.596 |
| DB00191 | Phentermine                                                                                                           | 0.119 | 0.767  | 0.178  | -0.11  | -0.993 | 0.631 | 0.834 | 0.467 | 0.225 | 0.07  |
| DB06973 | 4,4'-PROPANE-2,2-DIYLDIPHENOL                                                                                         | 0.125 | 0.408  | -1.508 | 0.756  | -0.031 | 0.446 | 0.617 | 0.043 | 0.708 | 0.379 |
| DB00949 | Felbamate                                                                                                             | 0.127 | 0.547  | 0.106  | 0.235  | -0.423 | 0.634 | 0.768 | 0.415 | 0.349 | 0.257 |
| DB07290 | (2R)-2-[[[4-FLUORO-3-METHYLPHENYL]SULFONYL]AMINO]-N-HYDROXY-2-TETRAHYDRO-2H-PYRAN-4-YLACETAMIDE                       | 0.131 | -0.5   | -1.52  | 1.675  | 1.478  | 0.515 | 0.267 | 0.027 | 0.901 | 0.905 |
| DB09010 | Carmofur                                                                                                              | 0.131 | 0.153  | 0.128  | 0.626  | -0.196 | 0.508 | 0.544 | 0.314 | 0.653 | 0.325 |
| DB02153 | 3-sulfinol-L-alanine                                                                                                  | 0.132 | 0.449  | 1.02   | -0.384 | -0.113 | 0.516 | 0.617 | 0.762 | 0.285 | 0.372 |
| DB09274 | Artesunate                                                                                                            | 0.132 | 0.309  | -0.983 | 0.567  | 0.267  | 0.46  | 0.56  | 0.117 | 0.649 | 0.51  |
| DB00598 | Labetalol                                                                                                             | 0.134 | 0.483  | -1.307 | 0.535  | -1.628 | 0.528 | 0.626 | 0.051 | 0.595 | 0.046 |
| DB09085 | Tetracaine                                                                                                            | 0.135 | -0.904 | 1.852  | 1.799  | -0.182 | 0.523 | 0.154 | 0.937 | 0.975 | 0.343 |
| DB02659 | Cholic Acid                                                                                                           | 0.136 | 1.118  | 1.361  | 0.452  | -1.09  | 0.504 | 0.849 | 0.866 | 0.587 | 0.112 |
| DB08483 |                                                                                                                       | 0.138 | -0.066 | 1.275  | 1.622  | -0.716 | 0.514 | 0.407 | 0.875 | 0.87  | 0.196 |
| DB07307 | N-cyclopropyl-4-methyl-3-[1-(2-methylphenyl)phthalazin-6-yl]benzamide                                                 | 0.141 | -0.355 | -0.597 | 1.333  | 0.025  | 0.463 | 0.266 | 0.138 | 0.877 | 0.418 |
| DB09073 | Palbociclib                                                                                                           | 0.142 | -0.123 | 0.885  | -1.304 | -0.01  | 0.507 | 0.392 | 0.735 | 0.063 | 0.436 |
| DB00110 | Palivizumab                                                                                                           | 0.143 | 0.086  | 0.078  | -0.411 | 1.068  | 0.507 | 0.485 | 0.365 | 0.25  | 0.822 |
| DB01171 | Moclobemide                                                                                                           | 0.143 | 0.214  | -1.497 | -0.449 | 0.718  | 0.464 | 0.506 | 0.029 | 0.237 | 0.749 |
| DB00056 | Gemtuzumab ozogamicin                                                                                                 | 0.144 | -0.053 | -0.101 | -0.165 | 1.246  | 0.51  | 0.402 | 0.288 | 0.338 | 0.86  |
| DB00412 | Rosiglitazone                                                                                                         | 0.144 | 0.158  | 0.559  | 0.409  | 0.062  | 0.517 | 0.521 | 0.586 | 0.606 | 0.439 |
| DB06207 | Sildenafil                                                                                                            | 0.145 | 0.184  | 0.913  | 0.419  | -0.916 | 0.549 | 0.539 | 0.719 | 0.392 | 0.123 |
| DB03084 | Cyclopropyl-(4-[5-(3,4-Dichlorophenyl)-2-[(1-Methyl)-Piperidin]-4-Yl]-3-Propyl-3h-Imidazol-4-Yl)-Pyrimidin-2-Yl)Amine | 0.148 | -0.133 | 0.55   | 0.54   | -0.064 | 0.468 | 0.368 | 0.355 | 0.605 | 0.346 |
| DB08010 | (3Z)-1-[(6-fluoro-4H-1,3-benzodioxin-8-yl)methyl]-4-[(E)-2-phenylethenyl]-1H-indole-2,3-dione 3-oxime                 | 0.148 | -0.133 | 0.55   | 0.54   | -0.064 | 0.468 | 0.368 | 0.355 | 0.605 | 0.346 |
| DB08015 | (3Z)-1-[(6-fluoro-4H-1,3-benzodioxin-8-yl)methyl]-4-phenyl-1H-indole-2,3-dione 3-oxime                                | 0.148 | -0.133 | 0.55   | 0.54   | -0.064 | 0.468 | 0.368 | 0.355 | 0.605 | 0.346 |
| DB00470 | Dronabinol                                                                                                            | 0.149 | 0.108  | 0.347  | 0.662  | -0.329 | 0.548 | 0.519 | 0.536 | 0.667 | 0.295 |
| DB07253 | N'-(5-chloro-1,3-benzodioxol-4-yl)-N-(3-methylsulfonylphenyl)pyrimidine-2,4-diamine                                   | 0.149 | 0.214  | 0.453  | 0.579  | 0.018  | 0.468 | 0.506 | 0.367 | 0.637 | 0.373 |
| DB01200 | Bromocriptine                                                                                                         | 0.151 | -0.305 | 1.619  | 1.224  | -0.267 | 0.509 | 0.319 | 0.934 | 0.883 | 0.317 |
| DB07702 | 17alpha-Estriol                                                                                                       | 0.156 | 0.359  | -0.19  | 0.861  | -1.432 | 0.465 | 0.601 | 0.345 | 0.735 | 0.047 |

|         |                                                                                                            |       |        |        |        |        |       |       |       |       |       |
|---------|------------------------------------------------------------------------------------------------------------|-------|--------|--------|--------|--------|-------|-------|-------|-------|-------|
| DB02983 | Para-Mercury-Benzenesulfonic Acid                                                                          | 0.158 | 0.536  | -0.863 | 1.346  | -1.149 | 0.532 | 0.812 | 0.16  | 0.867 | 0.074 |
| DB06940 | N-ethyl-4-[[5-(methoxycarbamoyl)-2-methylphenyl]amino]-5-methylpyrrolo[2,1-f][1,2,4]triazine-6-carboxamide | 0.158 | 0.021  | 0.51   | 0.47   | -0.134 | 0.49  | 0.417 | 0.338 | 0.591 | 0.312 |
| DB06991 | N-[2-methyl-5-(methylcarbomoyl)phenyl]-2-[[[(1R)-1-methylpropyl]amino]-1,3-thiazole-5-carboxamide          | 0.158 | 0.021  | 0.51   | 0.47   | -0.134 | 0.49  | 0.417 | 0.338 | 0.591 | 0.312 |
| DB07834 | N-(cyclopropylmethyl)-2'-methyl-5'-(5-methyl-1,3,4-oxadiazol-2-yl)biphenyl-4-carboxamide                   | 0.158 | 0.021  | 0.51   | 0.47   | -0.134 | 0.49  | 0.417 | 0.338 | 0.591 | 0.312 |
| DB07941 | PH-797804                                                                                                  | 0.158 | 0.021  | 0.51   | 0.47   | -0.134 | 0.49  | 0.417 | 0.338 | 0.591 | 0.312 |
| DB07943 | 2-{4-[5-(4-chlorophenyl)-4-pyrimidin-4-yl-1H-pyrazol-3-yl]piperidin-1-yl}-2-oxoethanol                     | 0.158 | 0.021  | 0.51   | 0.47   | -0.134 | 0.49  | 0.417 | 0.338 | 0.591 | 0.312 |
| DB08044 | ABT-341                                                                                                    | 0.158 | 0.404  | 0.312  | 0.062  | -0.251 | 0.709 | 0.773 | 0.505 | 0.298 | 0.332 |
| DB00073 | Rituximab                                                                                                  | 0.159 | -0.072 | -0.001 | -0.174 | 1.23   | 0.533 | 0.391 | 0.321 | 0.341 | 0.859 |
| DB00078 | Ibritumomab tiuxetan                                                                                       | 0.159 | -0.072 | -0.001 | -0.174 | 1.23   | 0.533 | 0.391 | 0.321 | 0.341 | 0.859 |
| DB00635 | Prednisone                                                                                                 | 0.16  | 0.218  | -1.008 | -0.778 | 0.539  | 0.477 | 0.535 | 0.125 | 0.163 | 0.658 |
| DB05015 | Belinostat                                                                                                 | 0.16  | 0.379  | 0.794  | -0.197 | 0.747  | 0.478 | 0.605 | 0.653 | 0.366 | 0.754 |
| DB01115 | Nifedipine                                                                                                 | 0.164 | -1.197 | 0.565  | 1.92   | 0.093  | 0.514 | 0.1   | 0.745 | 0.985 | 0.48  |
| DB07453 | 2-PHENYL-4H-BENZO[H]CHROMEN-4-ONE                                                                          | 0.164 | -0.034 | -1.394 | -0.223 | 0.702  | 0.478 | 0.378 | 0.048 | 0.307 | 0.695 |
| DB00518 | Albendazole                                                                                                | 0.165 | 0.884  | 0.001  | 0.336  | -0.824 | 0.477 | 0.808 | 0.409 | 0.549 | 0.122 |
| DB06789 | Hydroxyprogesterone caproate                                                                               | 0.165 | -0.054 | 0.429  | 0.001  | -0.637 | 0.483 | 0.379 | 0.459 | 0.406 | 0.179 |
| DB01229 | Paclitaxel                                                                                                 | 0.166 | 0.006  | 0.548  | 0.299  | -0.032 | 0.509 | 0.434 | 0.619 | 0.57  | 0.398 |
| DB06168 | Canakinumab                                                                                                | 0.166 | 0.492  | -0.039 | -0.745 | 0.11   | 0.636 | 0.697 | 0.523 | 0.085 | 0.654 |
| DB03082 | 6-[(Z)-Amino(lmino)Methyl]-N-[4-(Aminomethyl)Phenyl]-4-(Pyrimidin-2-Ylamino)-2-Naphthamide                 | 0.167 | 0.384  | 0.412  | -0.018 | 0.153  | 0.525 | 0.603 | 0.452 | 0.335 | 0.471 |
| DB00087 | Alemtuzumab                                                                                                | 0.169 | 0.174  | -0.249 | -0.386 | 1.415  | 0.51  | 0.496 | 0.242 | 0.258 | 0.913 |
| DB00482 | Celecoxib                                                                                                  | 0.17  | 0.263  | 1.374  | -0.519 | -0.096 | 0.504 | 0.541 | 0.901 | 0.242 | 0.349 |
| DB00922 | Levosimendan                                                                                               | 0.171 | 1.059  | 1.782  | 0.956  | -1.645 | 0.617 | 0.874 | 0.919 | 0.76  | 0.028 |
| DB00759 | Tetracycline                                                                                               | 0.172 | 0.401  | 1.019  | -0.297 | -0.568 | 0.629 | 0.711 | 0.912 | 0.274 | 0.214 |
| DB01130 | Prednicarbate                                                                                              | 0.172 | 0.4    | -0.965 | -1.063 | 0.37   | 0.477 | 0.595 | 0.121 | 0.103 | 0.601 |
| DB01250 | Olsalazine                                                                                                 | 0.174 | 0.562  | 0.31   | 1.141  | -1.097 | 0.52  | 0.662 | 0.436 | 0.746 | 0.083 |
| DB02482 | Phosphonothreonine                                                                                         | 0.174 | 0.346  | 1.176  | -0.558 | 0.468  | 0.485 | 0.577 | 0.746 | 0.208 | 0.646 |
| DB01054 | Nitrendipine                                                                                               | 0.176 | 0.006  | 2.542  | 1.441  | -0.176 | 0.531 | 0.409 | 0.981 | 0.916 | 0.343 |
| DB00534 | Chlormerodrin                                                                                              | 0.179 | 0.428  | 1.251  | -0.518 | -0.274 | 0.704 | 0.692 | 0.84  | 0.256 | 0.592 |
| DB07690 |                                                                                                            | 0.179 | 0.554  | 0.467  | -0.129 | -0.641 | 0.7   | 0.836 | 0.616 | 0.269 | 0.159 |
| DB00682 | Warfarin                                                                                                   | 0.18  | 1.262  | -0.925 | 0.022  | -1.424 | 0.525 | 0.867 | 0.121 | 0.397 | 0.061 |
| DB00773 | Etoposide                                                                                                  | 0.18  | 0.108  | -1.73  | -0.307 | 0.83   | 0.509 | 0.497 | 0.031 | 0.331 | 0.777 |
| DB00235 | Milrinone                                                                                                  | 0.182 | 0.925  | 1.22   | -1.115 | -1.106 | 0.609 | 0.857 | 0.83  | 0.065 | 0.071 |
| DB00499 | Flutamide                                                                                                  | 0.186 | -0.005 | -0.761 | 0.23   | 0.919  | 0.51  | 0.39  | 0.142 | 0.516 | 0.808 |
| DB00640 | Adenosine                                                                                                  | 0.186 | 0.48   | -1.923 | -0.45  | -0.59  | 0.536 | 0.636 | 0.012 | 0.242 | 0.215 |
| DB03088 | Pidolic Acid                                                                                               | 0.187 | 0.061  | 2.193  | 0.161  | 0.168  | 0.542 | 0.466 | 0.977 | 0.451 | 0.463 |
| DB06283 | Ziconotide                                                                                                 | 0.188 | 0.175  | 1.221  | 0.427  | 0.039  | 0.747 | 0.653 | 0.846 | 0.454 | 0.525 |
| DB06144 | Sertindole                                                                                                 | 0.189 | -0.749 | 1.598  | 1.97   | 0.032  | 0.551 | 0.182 | 0.927 | 0.989 | 0.453 |
| DB01094 | Hesperetin                                                                                                 | 0.19  | -0.74  | 0.606  | 1.338  | 0.191  | 0.5   | 0.159 | 0.615 | 0.89  | 0.491 |
| DB00120 | L-Phenylalanine                                                                                            | 0.192 | 0.226  | -0.139 | -0.911 | -0.534 | 0.537 | 0.519 | 0.276 | 0.127 | 0.229 |
| DB00566 | Succimer                                                                                                   | 0.192 | -0.431 | 0.636  | 1.586  | 0.591  | 0.508 | 0.252 | 0.603 | 0.93  | 0.685 |
| DB07556 | N-HYDROXY-2(R)-[[[4-METHOXYPHENYL]SULFONYL](3-PICOLYL)AMINO]-3-METHYLBUTANAMIDE HYDROCHLORIDE              | 0.194 | -0.105 | -0.817 | 0.234  | 1.08   | 0.534 | 0.408 | 0.118 | 0.454 | 0.826 |
| DB00155 | L-Citrulline                                                                                               | 0.197 | 0.661  | 0.484  | -0.03  | -1.899 | 0.525 | 0.708 | 0.554 | 0.377 | 0.023 |



|         |                                                                                                 |       |        |        |        |        |       |       |       |       |       |
|---------|-------------------------------------------------------------------------------------------------|-------|--------|--------|--------|--------|-------|-------|-------|-------|-------|
| DB09014 | Captodiame                                                                                      | 0.198 | 0.288  | 2.498  | 0.638  | -0.283 | 0.603 | 0.569 | 0.968 | 0.488 | 0.322 |
| DB00250 | Dapsone                                                                                         | 0.199 | 0.51   | 1.387  | 0.369  | -0.637 | 0.63  | 0.674 | 0.854 | 0.391 | 0.163 |
| DB01864 | 5'-Guanosine-Diphosphate-Monothiophosphate                                                      | 0.199 | 0.749  | 1.95   | -0.716 | -1.097 | 0.588 | 0.763 | 0.95  | 0.16  | 0.092 |
| DB00722 | Lisinopril                                                                                      | 0.201 | 0.396  | 1.966  | 1.297  | -0.142 | 0.668 | 0.689 | 0.935 | 0.872 | 0.397 |
| DB03368 | 5-Methyl-5-(4-Phenoxy-Phenyl)-Pyrimidine-2,4,6-Trione                                           | 0.201 | 0.252  | -0.508 | 0.926  | 0.696  | 0.538 | 0.533 | 0.083 | 0.63  | 0.672 |
| DB02596 | Alpha,Beta-Methyleneadenosine-5'-Triphosphate                                                   | 0.203 | 0.319  | 1.983  | 0.032  | 0      | 0.59  | 0.643 | 0.948 | 0.328 | 0.427 |
| DB06151 | Acetylcysteine                                                                                  | 0.204 | -0.747 | -0.984 | 0.482  | 0.983  | 0.536 | 0.183 | 0.09  | 0.605 | 0.808 |
| DB00092 | Alefacept                                                                                       | 0.205 | 0.043  | 0.131  | -0.235 | 1.205  | 0.535 | 0.453 | 0.391 | 0.323 | 0.847 |
| DB04739 | 4-[(4-METHYL-1-PIPERAZINYL)METHYL]-N-[3-[[4-(3-PYRIDINYL)-2-PYRIMIDINYL]AMINO]PHENYL]-BENZAMIDE | 0.205 | 0.615  | 0.57   | -0.272 | 0      | 0.518 | 0.703 | 0.35  | 0.285 | 0.368 |
| DB08325 | 2-(2-HYDROXYETHYLAMINO)-6-(3-CHLOROANILINO)-9-ISOPROPYLPURINE                                   | 0.207 | 0.028  | -0.359 | 0.706  | 0.456  | 0.511 | 0.409 | 0.21  | 0.682 | 0.618 |
| DB09143 | Sonidegib                                                                                       | 0.207 | 0.539  | -0.311 | -1.184 | 0.28   | 0.571 | 0.619 | 0.428 | 0.022 | 0.576 |
| DB00308 | Ibutilide                                                                                       | 0.211 | 0.111  | 0.643  | 0.83   | -0.242 | 0.56  | 0.474 | 0.634 | 0.68  | 0.302 |
| DB03921 | 4-(3-Pyridin-2-Yl-1h-Pyrazol-4-Yl)Quinoline                                                     | 0.211 | -0.835 | 0.922  | 1.789  | 0.473  | 0.533 | 0.152 | 0.558 | 0.955 | 0.618 |
| DB06732 | beta-Naphthoflavone                                                                             | 0.211 | 0.288  | 0.847  | 0.288  | -0.353 | 0.677 | 0.677 | 0.738 | 0.389 | 0.285 |
| DB08351 | N-cyclopropyl-4-methyl-3-{2-[(2-morpholin-4-ylethyl)amino]quinazolin-6-yl}benzamide             | 0.214 | -0.376 | -0.314 | 0.612  | 0.545  | 0.51  | 0.246 | 0.214 | 0.667 | 0.652 |
| DB08816 | Ticagrelor                                                                                      | 0.217 | 0.51   | 2.049  | 0.198  | -0.479 | 0.747 | 0.823 | 0.941 | 0.39  | 0.228 |
| DB00344 | Protriptyline                                                                                   | 0.219 | 1.013  | -1.329 | -0.123 | -0.491 | 0.54  | 0.835 | 0.079 | 0.365 | 0.234 |
| DB02519 | Indirubin-5-Sulphonate                                                                          | 0.219 | 0.292  | -1.063 | 0.491  | 0.498  | 0.514 | 0.546 | 0.071 | 0.599 | 0.616 |
| DB00227 | Lovastatin                                                                                      | 0.222 | 0.117  | -0.539 | 0.374  | 0.765  | 0.527 | 0.478 | 0.217 | 0.584 | 0.774 |
| DB00618 | Demeclocycline                                                                                  | 0.222 | 0.68   | -0.072 | 1.25   | -0.162 | 0.529 | 0.733 | 0.391 | 0.865 | 0.33  |
| DB08162 | Fasudil                                                                                         | 0.222 | -1.021 | 0.043  | -0.71  | -0.126 | 0.52  | 0.091 | 0.42  | 0.183 | 0.384 |
| DB00608 | Chloroquine                                                                                     | 0.223 | -0.079 | -1.107 | 0.945  | -0.346 | 0.543 | 0.431 | 0.104 | 0.792 | 0.29  |
| DB02309 | 5--Monophosphate-9-Beta-D-Ribofuranosyl Xanthine                                                | 0.223 | 0.317  | 1.64   | 0.533  | -0.59  | 0.664 | 0.661 | 0.896 | 0.459 | 0.21  |
| DB00261 | Anagrelide                                                                                      | 0.224 | 0.871  | 1.688  | 0.329  | -1.021 | 0.69  | 0.856 | 0.918 | 0.401 | 0.071 |
| DB00994 | Neomycin                                                                                        | 0.225 | 0.847  | 1.408  | 0.94   | -1.251 | 0.655 | 0.841 | 0.859 | 0.765 | 0.047 |
| DB08413 | METHYL-PHOSPHONIC ACID MONO-(4-NITRO-PHENYL) ESTER                                              | 0.228 | 0.138  | 1.554  | 0.29   | -0.05  | 0.652 | 0.573 | 0.879 | 0.372 | 0.436 |
| DB03766 | Propanoic acid                                                                                  | 0.229 | 0.102  | 1.194  | 0.463  | -0.143 | 0.608 | 0.485 | 0.812 | 0.419 | 0.35  |
| DB05260 | Gallium nitrate                                                                                 | 0.23  | 1.448  | -1.414 | -1.446 | -0.707 | 0.586 | 0.913 | 0.053 | 0.053 | 0.178 |
| DB00148 | Creatine                                                                                        | 0.231 | -0.652 | 1.586  | -0.173 | -0.171 | 0.551 | 0.21  | 0.901 | 0.27  | 0.346 |
| DB00605 | Sulindac                                                                                        | 0.232 | 0.03   | 1.788  | 0.205  | 0.223  | 0.521 | 0.422 | 0.958 | 0.509 | 0.509 |
| DB00445 | Epirubicin                                                                                      | 0.236 | 0.759  | -0.879 | -2.117 | -0.408 | 0.51  | 0.762 | 0.15  | 0.022 | 0.268 |
| DB00268 | Ropinirole                                                                                      | 0.238 | -0.637 | 2.522  | 1.963  | 0.248  | 0.56  | 0.218 | 0.988 | 0.98  | 0.507 |
| DB07232 | Veliparib                                                                                       | 0.238 | 0.975  | -1.501 | -1.433 | 1.32   | 0.563 | 0.819 | 0.025 | 0.041 | 0.866 |
| DB07330 | trans-4-(7-carbamoyl-1H-benzimidazol-2-yl)-1-propylpiperidinium                                 | 0.238 | 0.975  | -1.501 | -1.433 | 1.32   | 0.563 | 0.819 | 0.025 | 0.041 | 0.866 |
| DB00379 | Mexiletine                                                                                      | 0.239 | 1.105  | 1.681  | 0.847  | -0.06  | 0.54  | 0.884 | 0.938 | 0.765 | 0.397 |
| DB02379 | Beta-D-Glucose                                                                                  | 0.241 | 0.103  | 3.661  | -1.241 | -0.241 | 0.55  | 0.472 | 1     | 0.074 | 0.321 |
| DB05332 | Romiplostim                                                                                     | 0.241 | 0.391  | 0.419  | -0.381 | -0.14  | 0.544 | 0.547 | 0.587 | 0.47  | 0.485 |
| DB01014 | Balsalazide                                                                                     | 0.243 | 0.675  | 1.711  | 0.331  | -1.25  | 0.547 | 0.715 | 0.926 | 0.473 | 0.074 |
| DB09078 | Lenvatinib                                                                                      | 0.246 | 0.56   | 0.01   | 0.766  | -0.48  | 0.547 | 0.703 | 0.322 | 0.721 | 0.265 |
| DB00893 | Iron Dextran                                                                                    | 0.247 | 0.883  | 0.183  | 0.508  | -0.398 | 0.55  | 0.765 | 0.194 | 0.527 | 0.267 |
| DB00316 | Acetaminophen                                                                                   | 0.248 | 0.212  | 1.722  | -2.137 | -1.712 | 0.562 | 0.504 | 0.924 | 0.021 | 0.032 |

|         |                                                                                                                    |       |        |        |        |        |       |       |       |       |       |
|---------|--------------------------------------------------------------------------------------------------------------------|-------|--------|--------|--------|--------|-------|-------|-------|-------|-------|
| DB01809 | 1-Ter-Butyl-3-P-Tolyl-1h-Pyrazolo[3,4-D]Pyrimidin-4-Ylamine                                                        | 0.248 | 0.666  | 1.494  | -0.063 | -1.142 | 0.55  | 0.743 | 0.848 | 0.408 | 0.078 |
| DB04820 | Nialamide                                                                                                          | 0.249 | 0.394  | -0.188 | 0.653  | 0.131  | 0.662 | 0.709 | 0.539 | 0.622 | 0.486 |
| DB00645 | Dyclonine                                                                                                          | 0.25  | 0.465  | -0.363 | 0.155  | 0.539  | 0.54  | 0.625 | 0.268 | 0.476 | 0.656 |
| DB01327 | Cefazolin                                                                                                          | 0.251 | 0.318  | 0.608  | 1.244  | 0.142  | 0.581 | 0.597 | 0.611 | 0.822 | 0.488 |
| DB08029 | N-2--(biphenyl-4-ylsulfonyl)-N-hydroxy-N-2--(2-hydroxyethyl)glycinamide                                            | 0.253 | 0.064  | 0.033  | 0.605  | 0.213  | 0.558 | 0.454 | 0.344 | 0.499 | 0.482 |
| DB07929 | N-(TERT-BUTYL)-3,5-DIMETHYL-N'-[(5-METHYL-2,3-DIHYDRO-1,4-BENZODIOXIN-6-YL)CARBONYL]BENZOHYDRAZIDE                 | 0.254 | 0.652  | 1.624  | 0.595  | -0.974 | 0.666 | 0.808 | 0.92  | 0.512 | 0.118 |
| DB11616 | Pirarubicin                                                                                                        | 0.266 | 0.552  | -0.844 | 0.718  | 0.473  | 0.539 | 0.669 | 0.145 | 0.702 | 0.63  |
| DB00248 | Cabergoline                                                                                                        | 0.267 | -0.185 | 1.764  | 1.831  | -0.595 | 0.566 | 0.372 | 0.937 | 0.968 | 0.22  |
| DB00688 | Mycophenolate mofetil                                                                                              | 0.272 | 0.641  | -2.216 | -0.765 | 1.113  | 0.523 | 0.72  | 0.015 | 0.155 | 0.874 |
| DB04839 | Cyproterone acetate                                                                                                | 0.272 | 0.402  | -1.085 | -1.001 | 0.602  | 0.566 | 0.628 | 0.097 | 0.093 | 0.683 |
| DB07266 | 8-ethyl-3,10,10-trimethyl-4,5,6,8,10,12-hexahydropyrazolo[4',3':6,7]cyclohepta[1,2-b]pyrrolo[2,3-f]indol-9(1H)-one | 0.272 | 0.36   | 0.435  | -0.535 | 0.19   | 0.547 | 0.593 | 0.502 | 0.235 | 0.488 |
| DB00284 | Acarbose                                                                                                           | 0.273 | 0.694  | 1.958  | -0.272 | -1.01  | 0.716 | 0.81  | 0.943 | 0.24  | 0.073 |
| DB05018 | Migalastat                                                                                                         | 0.274 | 1.394  | 1.187  | 0.333  | -2.62  | 0.559 | 0.9   | 0.812 | 0.476 | 0.004 |
| DB00528 | Lercanidipine                                                                                                      | 0.275 | 0.23   | 0.792  | 0.667  | 0.294  | 0.522 | 0.468 | 0.782 | 0.73  | 0.517 |
| DB08462 | N-(4-PHENYLAMINO-QUINAZOLIN-6-YL)-ACRYLAMIDE                                                                       | 0.275 | 0.929  | 1.211  | 0.343  | -0.68  | 0.547 | 0.823 | 0.708 | 0.555 | 0.125 |
| DB00309 | Vindesine                                                                                                          | 0.276 | 0.492  | -1.029 | -0.54  | 0.953  | 0.564 | 0.628 | 0.064 | 0.199 | 0.818 |
| DB00865 | Benzphetamine                                                                                                      | 0.276 | 0.81   | 1.499  | -0.153 | -0.699 | 0.749 | 0.881 | 0.885 | 0.22  | 0.157 |
| DB00028 | Immune Globulin Human                                                                                              | 0.278 | 0.387  | -0.508 | -0.942 | 0.155  | 0.568 | 0.602 | 0.12  | 0.138 | 0.439 |
| DB00580 | Valdecoxib                                                                                                         | 0.278 | 0.931  | 1.545  | -0.746 | -0.763 | 0.559 | 0.777 | 0.905 | 0.15  | 0.176 |
| DB01099 | Flucytosine                                                                                                        | 0.278 | 0.253  | -0.812 | -0.313 | 0.654  | 0.549 | 0.537 | 0.1   | 0.3   | 0.717 |
| DB07995 | N-[2-(4-BROMOCINNAMYLAMINO)ETHYL]-5-ISOQUINOLINE SULFONAMIDE                                                       | 0.279 | 0.433  | -0.936 | -1.255 | 0.316  | 0.558 | 0.627 | 0.137 | 0.082 | 0.549 |
| DB00377 | Palonosetron                                                                                                       | 0.282 | 0.853  | 0.564  | 0.654  | -0.387 | 0.781 | 0.871 | 0.596 | 0.521 | 0.287 |
| DB00757 | Dolasetron                                                                                                         | 0.282 | 0.853  | 0.564  | 0.654  | -0.387 | 0.781 | 0.871 | 0.596 | 0.521 | 0.287 |
| DB00417 | Phenoxymethylpenicillin                                                                                            | 0.283 | 0.828  | 0.561  | 0.486  | -0.141 | 0.737 | 0.856 | 0.576 | 0.464 | 0.397 |
| DB07662 | N-[4-(3-BROMO-PHENYLAMINO)-QUINAZOLIN-6-YL]-ACRYLAMIDE                                                             | 0.283 | 0.908  | 1.266  | 1.045  | -1.084 | 0.552 | 0.823 | 0.755 | 0.811 | 0.099 |
| DB09205 | Moxisylyte                                                                                                         | 0.283 | 0.495  | 1.115  | -1.072 | 0.184  | 0.487 | 0.577 | 0.696 | 0.218 | 0.46  |
| DB11615 |                                                                                                                    | 0.285 | 0.78   | -0.761 | -0.055 | 0.604  | 0.604 | 0.809 | 0.14  | 0.364 | 0.729 |
| DB00009 | Alteplase                                                                                                          | 0.288 | 0.295  | 0.14   | 0.296  | -0.034 | 0.583 | 0.569 | 0.192 | 0.45  | 0.405 |
| DB00015 | Retepase                                                                                                           | 0.288 | 0.295  | 0.14   | 0.296  | -0.034 | 0.583 | 0.569 | 0.192 | 0.45  | 0.405 |
| DB00029 | Anistreplase                                                                                                       | 0.288 | 0.295  | 0.14   | 0.296  | -0.034 | 0.583 | 0.569 | 0.192 | 0.45  | 0.405 |
| DB00427 | Triprolidine                                                                                                       | 0.288 | 0.452  | 1.425  | 1.014  | 0.118  | 0.704 | 0.709 | 0.854 | 0.68  | 0.486 |
| DB00385 | Valrubicin                                                                                                         | 0.289 | 0.213  | -0.558 | -0.433 | 1.808  | 0.556 | 0.51  | 0.143 | 0.26  | 0.976 |
| DB06480 | Prucalopride                                                                                                       | 0.289 | 0.673  | -0.083 | 0.306  | -0.264 | 0.757 | 0.833 | 0.303 | 0.449 | 0.336 |
| DB08165 | indane-5-sulfonamide                                                                                               | 0.289 | 0.795  | 0.693  | -1.094 | -0.729 | 0.687 | 0.854 | 0.678 | 0.071 | 0.137 |
| DB08687 | FG-2216                                                                                                            | 0.29  | 0.585  | 1.073  | 0.329  | -0.437 | 0.577 | 0.667 | 0.792 | 0.492 | 0.265 |
| DB01356 | Lithium cation                                                                                                     | 0.292 | 0.015  | 0.808  | 0.895  | 0.264  | 0.562 | 0.427 | 0.668 | 0.752 | 0.502 |
| DB01946 | 3-[1-(3-Aminopropyl)-1h-Indol-3-YI]-4-(1-Methyl-1h-Indol-3-YI)-1h-Pyrrole-2,5-Dione                                | 0.292 | 0.662  | -2.058 | 0.194  | 0.71   | 0.581 | 0.717 | 0.01  | 0.415 | 0.679 |
| DB04786 | Suramin                                                                                                            | 0.295 | -0.104 | 0.519  | 1.285  | 0.864  | 0.56  | 0.356 | 0.598 | 0.879 | 0.79  |
| DB03929 | D-Serine                                                                                                           | 0.299 | 0.652  | 1.039  | -0.094 | -1.126 | 0.685 | 0.757 | 0.748 | 0.381 | 0.078 |
| DB00999 | Hydrochlorothiazide                                                                                                | 0.301 | 0.911  | 0.985  | -0.393 | -0.934 | 0.565 | 0.761 | 0.764 | 0.236 | 0.124 |
| DB01422 | Nitroxoline                                                                                                        | 0.302 | 0.084  | -0.335 | -0.003 | 1.049  | 0.55  | 0.449 | 0.29  | 0.422 | 0.841 |
| DB04099 | Deamido-Nad+                                                                                                       | 0.302 | 0.831  | 1.905  | -1.028 | -0.326 | 0.705 | 0.812 | 0.927 | 0.079 | 0.275 |

|         |                                                                                                                   |       |        |        |        |        |       |       |       |       |       |
|---------|-------------------------------------------------------------------------------------------------------------------|-------|--------|--------|--------|--------|-------|-------|-------|-------|-------|
| DB08895 | Tofacitinib                                                                                                       | 0.302 | -0.698 | 0.52   | -0.179 | -0.987 | 0.586 | 0.161 | 0.632 | 0.383 | 0.124 |
| DB00254 | Doxycycline                                                                                                       | 0.305 | 0.653  | -2.929 | 0.966  | 1.21   | 0.558 | 0.68  | 0.005 | 0.737 | 0.849 |
| DB00898 | Ethanol                                                                                                           | 0.305 | 1.253  | 2.825  | 0.418  | -0.17  | 0.581 | 0.931 | 0.995 | 0.615 | 0.36  |
| DB01375 | Aluminium monostearate                                                                                            | 0.306 | -0.277 | 0.995  | 1.397  | 0.257  | 0.591 | 0.347 | 0.75  | 0.823 | 0.501 |
| DB07013 | TERT-BUTYL 4-({[4-(BUT-2-YN-1-YLAMINO)PHENYL]SULFONYL}METHYL)-4-[(HYDROXYAMINO)CARBONYL]PIPERIDIN E-1-CARBOXYLATE | 0.307 | 0.74   | -0.498 | 0.805  | 0.042  | 0.585 | 0.744 | 0.072 | 0.58  | 0.412 |
| DB07233 | N-{{[4-(but-2-yn-1-yloxy)phenyl]sulfonyl}-5-methyl-D-tryptophan                                                   | 0.307 | 0.74   | -0.498 | 0.805  | 0.042  | 0.585 | 0.744 | 0.072 | 0.58  | 0.412 |
| DB13025 | Tiapride                                                                                                          | 0.309 | 0.862  | 3.531  | 0.185  | -0.837 | 0.669 | 0.809 | 0.992 | 0.313 | 0.126 |
| DB04522 | Dexfosfoserine                                                                                                    | 0.31  | 0.775  | -0.508 | 0.787  | -0.218 | 0.561 | 0.77  | 0.223 | 0.738 | 0.331 |
| DB08036 | 6,7,12,13-tetrahydro-5H-indolo[2,3-a]pyrrolo[3,4-c]carbazol-5-one                                                 | 0.311 | 0.726  | -0.558 | -0.102 | -0.167 | 0.561 | 0.779 | 0.208 | 0.36  | 0.32  |
| DB00740 | Riluzole                                                                                                          | 0.313 | 0.168  | 0.343  | 0.521  | -0.456 | 0.593 | 0.497 | 0.54  | 0.556 | 0.222 |
| DB00554 | Piroxicam                                                                                                         | 0.317 | 0.516  | 2.275  | 0.266  | -0.574 | 0.604 | 0.654 | 0.975 | 0.497 | 0.211 |
| DB01587 | Ketazolam                                                                                                         | 0.323 | 0.123  | 1.816  | 0.246  | -0.17  | 0.62  | 0.496 | 0.923 | 0.398 | 0.341 |
| DB03959 | N,O6-Disulfo-Glucosamine                                                                                          | 0.323 | 0.938  | 1.725  | 0.809  | -1.083 | 0.648 | 0.835 | 0.912 | 0.664 | 0.096 |
| DB07218 | 6-CHLORO-9-HYDROXY-1,3-DIMETHYL-1,9-DIHYDRO-4H-PYRAZOLO[3,4-B]QUINOLIN-4-ONE                                      | 0.327 | -0.041 | 0.512  | 0.674  | 0.768  | 0.578 | 0.431 | 0.314 | 0.688 | 0.718 |
| DB07272 | N-(4-AMINO-5-CYANO-6-ETHOXYPYRIDIN-2-YL)-2-(4-BROMO-2,5-DIMETHOXYPHENYL)ACETAMIDE                                 | 0.327 | -0.041 | 0.512  | 0.674  | 0.768  | 0.578 | 0.431 | 0.314 | 0.688 | 0.718 |
| DB09079 | Nintedanib                                                                                                        | 0.328 | -0.854 | 0.123  | 0.353  | 1.014  | 0.582 | 0.1   | 0.51  | 0.614 | 0.884 |
| DB00494 | Entacapone                                                                                                        | 0.329 | 0.721  | 1.071  | 0.315  | -0.366 | 0.728 | 0.839 | 0.786 | 0.365 | 0.272 |
| DB13150 | Coagulation factor VII human                                                                                      | 0.33  | 0.857  | 1.159  | 0.262  | -0.739 | 0.745 | 0.861 | 0.796 | 0.36  | 0.147 |
| DB00649 | Stavudine                                                                                                         | 0.337 | 0.066  | 1.729  | -0.029 | -0.19  | 0.791 | 0.582 | 0.934 | 0.385 | 0.395 |
| DB00879 | Emtricitabine                                                                                                     | 0.337 | 0.066  | 1.729  | -0.029 | -0.19  | 0.791 | 0.582 | 0.934 | 0.385 | 0.395 |
| DB01048 | Abacavir                                                                                                          | 0.337 | 0.066  | 1.729  | -0.029 | -0.19  | 0.791 | 0.582 | 0.934 | 0.385 | 0.395 |
| DB03431 |                                                                                                                   | 0.339 | -0.213 | -0.306 | 1.091  | 0.357  | 0.6   | 0.314 | 0.325 | 0.861 | 0.584 |
| DB09298 | Silibinin                                                                                                         | 0.34  | 0.688  | 1.517  | 0.442  | -1.012 | 0.604 | 0.716 | 0.894 | 0.572 | 0.106 |
| DB08882 | Linagliptin                                                                                                       | 0.341 | 0.731  | -2.634 | 0.496  | 0.306  | 0.648 | 0.752 | 0.001 | 0.454 | 0.535 |
| DB01026 | Ketoconazole                                                                                                      | 0.347 | 0.475  | -0.221 | 1.839  | 1.074  | 0.613 | 0.66  | 0.332 | 0.973 | 0.88  |
| DB01381 | Ginkgo biloba                                                                                                     | 0.347 | 0.199  | 2.238  | 0.665  | -0.174 | 0.641 | 0.544 | 0.967 | 0.617 | 0.335 |
| DB00415 | Ampicillin                                                                                                        | 0.349 | 1.169  | -0.823 | 0.341  | -0.599 | 0.609 | 0.856 | 0.155 | 0.562 | 0.219 |
| DB03448 | 2'-Deoxyuridine 3'-Monophosphate                                                                                  | 0.349 | 0.474  | 0.818  | -0.016 | 0.115  | 0.555 | 0.579 | 0.678 | 0.517 | 0.517 |
| DB08339 | 6-(2,6-DICHLOROPHENYL)-2-{{[3-(HYDROXYMETHYL)PHENYL]AMINO}-8-METHYLPYRIDO[2,3-D]PYRIMIDIN-7(8H)-ONE               | 0.349 | 0.551  | 0.695  | 0.171  | -0.546 | 0.594 | 0.688 | 0.61  | 0.499 | 0.192 |
| DB00176 | Fluvoxamine                                                                                                       | 0.352 | 0.498  | 0.653  | 0.408  | -0.484 | 0.603 | 0.638 | 0.647 | 0.392 | 0.235 |
| DB01042 | Melphalan                                                                                                         | 0.352 | 0.688  | -0.46  | 1.043  | 0.654  | 0.592 | 0.705 | 0.249 | 0.746 | 0.688 |
| DB06616 | Bosutinib                                                                                                         | 0.352 | -0.279 | 0.995  | 0.161  | 0.624  | 0.592 | 0.255 | 0.82  | 0.474 | 0.784 |
| DB04367 | Debromohymenialdisine                                                                                             | 0.355 | 1.685  | -1.769 | -0.52  | -1.09  | 0.599 | 0.951 | 0.016 | 0.224 | 0.084 |
| DB03604 | Tiratricol                                                                                                        | 0.356 | 0.957  | 0.35   | -0.157 | -0.909 | 0.596 | 0.795 | 0.252 | 0.352 | 0.136 |
| DB00119 | Pyruvic acid                                                                                                      | 0.358 | 0.219  | -0.842 | -0.33  | -0.579 | 0.61  | 0.539 | 0.117 | 0.282 | 0.235 |
| DB00441 | Gemcitabine                                                                                                       | 0.358 | 0.743  | -1.542 | -0.258 | 0.685  | 0.593 | 0.762 | 0.043 | 0.304 | 0.751 |
| DB01235 | Levodopa                                                                                                          | 0.358 | 0.894  | 1.439  | 0.185  | -0.235 | 0.611 | 0.809 | 0.894 | 0.529 | 0.314 |
| DB00728 | Rocuronium                                                                                                        | 0.368 | 0.581  | -0.543 | 0.12   | 1.206  | 0.591 | 0.699 | 0.208 | 0.453 | 0.912 |
| DB07655 | 3-AMINO-3-BENZYL-[4.3.0]BICYCLO-1,6-DIAZANONAN-2-ONE                                                              | 0.369 | 0.599  | -0.765 | -0.283 | 0.38   | 0.603 | 0.72  | 0.119 | 0.297 | 0.592 |
| DB00342 | Terfenadine                                                                                                       | 0.371 | 0.091  | 0.533  | 1.517  | 0.27   | 0.612 | 0.471 | 0.63  | 0.929 | 0.536 |
| DB00564 | Carbamazepine                                                                                                     | 0.373 | 0.597  | -0.53  | 0.448  | 0.321  | 0.598 | 0.711 | 0.218 | 0.587 | 0.551 |
| DB03162 | 4-Hydroxy-1,2,5-Thiadiazole-3-Carboxylic Acid                                                                     | 0.373 | 0.447  | 1.915  | -1.281 | -1.327 | 0.703 | 0.686 | 0.953 | 0.059 | 0.049 |

|         |                                                                                                        |       |        |        |        |        |       |       |       |       |       |
|---------|--------------------------------------------------------------------------------------------------------|-------|--------|--------|--------|--------|-------|-------|-------|-------|-------|
| DB03322 | Dexpropranolol                                                                                         | 0.373 | 0.35   | 0.621  | 0.454  | 0.106  | 0.527 | 0.511 | 0.609 | 0.577 | 0.461 |
| DB03940 | Oxamic Acid                                                                                            | 0.373 | 0.447  | 1.915  | -1.281 | -1.327 | 0.703 | 0.686 | 0.953 | 0.059 | 0.049 |
| DB04571 | Trioxsalen                                                                                             | 0.373 | 0.541  | 0.293  | 0.481  | -0.064 | 0.711 | 0.751 | 0.479 | 0.437 | 0.401 |
| DB04315 | Guanosine-5'-Diphosphate                                                                               | 0.376 | 0.395  | -0.597 | -0.433 | 0.635  | 0.621 | 0.613 | 0.212 | 0.247 | 0.705 |
| DB08183 |                                                                                                        | 0.38  | -0.669 | 0.922  | -0.753 | -0.527 | 0.623 | 0.193 | 0.778 | 0.161 | 0.237 |
| DB08312 | 6-CYCLOHEXYLMETHYLOXY-5-NITROSO-PYRIMIDINE-2,4-DIAMINE                                                 | 0.381 | 0.342  | -0.866 | 0.367  | 0.772  | 0.625 | 0.595 | 0.101 | 0.56  | 0.759 |
| DB00156 | L-Threonine                                                                                            | 0.382 | 0.518  | 1.511  | 0.593  | -0.363 | 0.68  | 0.673 | 0.877 | 0.473 | 0.267 |
| DB00366 | Doxylamine                                                                                             | 0.382 | 0.744  | 1.197  | 1      | -0.561 | 0.653 | 0.758 | 0.795 | 0.672 | 0.221 |
| DB03003 | Glutathione Sulfonic Acid                                                                              | 0.383 | 0.475  | 1.319  | -0.703 | -1.151 | 0.696 | 0.71  | 0.845 | 0.131 | 0.042 |
| DB08239 | (2S)-4-(2,5-DIFLUOROPHENYL)-N-METHYL-2-PHENYL-N-PIPERIDIN-4-YL-2,5-DIHYDRO-1H-PYRROLE-1-CARBOXAMIDE    | 0.383 | 0.79   | 1.755  | -0.384 | -0.456 | 0.757 | 0.86  | 0.919 | 0.231 | 0.239 |
| DB08244 | (1S)-1-CYCLOPROPYL-2-[(2S)-4-(2,5-DIFLUOROPHENYL)-2-PHENYL-2,5-DIHYDRO-1H-PYRROL-1-YL]-2-OXOETHANAMINE | 0.383 | 0.79   | 1.755  | -0.384 | -0.456 | 0.757 | 0.86  | 0.919 | 0.231 | 0.239 |
| DB08980 | Fendiline                                                                                              | 0.383 | 1.078  | -0.991 | 0.252  | -0.245 | 0.8   | 0.914 | 0.05  | 0.42  | 0.337 |
| DB09054 | Idelalisib                                                                                             | 0.387 | 0.404  | -0.806 | 0.179  | 0.447  | 0.627 | 0.632 | 0.104 | 0.476 | 0.618 |
| DB09166 | Etizolam                                                                                               | 0.387 | 0.473  | 2.615  | -0.104 | -0.321 | 0.712 | 0.71  | 0.979 | 0.259 | 0.288 |
| DB00643 | Mebendazole                                                                                            | 0.39  | 0.808  | -0.05  | -0.047 | 0.13   | 0.624 | 0.79  | 0.302 | 0.402 | 0.466 |
| DB00409 | Remoxipride                                                                                            | 0.391 | 0.405  | 2.432  | 0.515  | -1.274 | 0.614 | 0.608 | 0.974 | 0.432 | 0.061 |
| DB00595 | Oxytetracycline                                                                                        | 0.392 | 0.23   | -1.357 | 0.391  | 1.25   | 0.637 | 0.546 | 0.071 | 0.626 | 0.879 |
| DB07364 | 6-PHENYL[5H]PYRROLO[2,3-B]PYRAZINE                                                                     | 0.393 | 0.045  | 1.577  | 1.558  | -0.288 | 0.627 | 0.427 | 0.982 | 0.915 | 0.266 |
| DB11617 | Aclarubicin                                                                                            | 0.394 | 0.837  | -0.1   | 0.36   | 0.178  | 0.86  | 0.897 | 0.363 | 0.653 | 0.739 |
| DB00675 | Tamoxifen                                                                                              | 0.395 | 0.389  | 0.162  | 1.046  | 0.645  | 0.612 | 0.587 | 0.52  | 0.877 | 0.731 |
| DB03159 | CRA_8696                                                                                               | 0.395 | 0.447  | -0.291 | -0.251 | 0.098  | 0.615 | 0.606 | 0.144 | 0.333 | 0.431 |
| DB08881 | Vemurafenib                                                                                            | 0.396 | -0.18  | 1.377  | 0.982  | 0.578  | 0.617 | 0.374 | 0.954 | 0.775 | 0.66  |
| DB00293 | Raltitrexed                                                                                            | 0.397 | 0.671  | -0.216 | 0.04   | -1.423 | 0.701 | 0.78  | 0.524 | 0.368 | 0.044 |
| DB01129 | Rabeprazole                                                                                            | 0.397 | 0.53   | 0.559  | -0.452 | 1.012  | 0.612 | 0.68  | 0.585 | 0.273 | 0.829 |
| DB00081 | Tositumomab                                                                                            | 0.398 | 0.334  | 0.04   | -0.186 | 1.169  | 0.591 | 0.582 | 0.35  | 0.325 | 0.839 |
| DB01097 | Leflunomide                                                                                            | 0.398 | 0.257  | 0.27   | 0.205  | 0.309  | 0.625 | 0.553 | 0.452 | 0.507 | 0.55  |
| DB07249 | N-(5-chloro-1,3-benzodioxol-4-yl)-6-methoxy-7-(3-piperidin-1-ylpropoxy)quinazolin-4-amine              | 0.398 | 0.913  | 0.701  | -0.155 | -0.238 | 0.625 | 0.834 | 0.453 | 0.358 | 0.292 |
| DB08841 | Tyramine                                                                                               | 0.398 | 0.853  | 0.564  | 0.654  | -0.084 | 0.815 | 0.871 | 0.596 | 0.521 | 0.424 |
| DB07118 | Hymecromone                                                                                            | 0.399 | 0.429  | 1.571  | -0.404 | -0.091 | 0.622 | 0.629 | 0.869 | 0.183 | 0.386 |
| DB00795 | Sulfasalazine                                                                                          | 0.403 | 0.094  | -0.524 | -0.302 | -0.892 | 0.635 | 0.475 | 0.222 | 0.316 | 0.127 |
| DB08691 | ethyl 3-[(E)-2-amino-1-cyanoethenyl]-6,7-dichloro-1-methyl-1H-indole-2-carboxylate                     | 0.408 | 1.275  | -0.536 | -1.537 | -0.861 | 0.605 | 0.867 | 0.229 | 0.03  | 0.134 |
| DB00477 | Chlorpromazine                                                                                         | 0.413 | 0.539  | 1.74   | 2.398  | 0.641  | 0.627 | 0.685 | 0.938 | 0.998 | 0.728 |
| DB00368 | Norepinephrine                                                                                         | 0.419 | 0.449  | 1.233  | -0.097 | -0.851 | 0.646 | 0.637 | 0.913 | 0.417 | 0.152 |
| DB07010 | N-BENZYL-4-[4-(3-CHLOROPHENYL)-1H-PYRAZOL-3-YL]-1H-PYRROLE-2-CARBOXAMIDE                               | 0.419 | 0.24   | 1.339  | 0.54   | 0.501  | 0.656 | 0.558 | 0.916 | 0.605 | 0.66  |
| DB03566 | Spermidine                                                                                             | 0.421 | 0.865  | 1.309  | -0.396 | -0.583 | 0.605 | 0.744 | 0.836 | 0.214 | 0.215 |
| DB08873 | Boceprevir                                                                                             | 0.421 | 0.217  | 2.374  | -0.101 | 1.754  | 0.618 | 0.514 | 0.982 | 0.379 | 0.955 |
| DB00914 | Phenformin                                                                                             | 0.424 | 1.454  | 2.202  | -0.319 | -0.868 | 0.613 | 0.899 | 0.992 | 0.296 | 0.133 |
| DB01162 | Terazosin                                                                                              | 0.426 | -0.041 | 2.087  | 1.826  | -0.683 | 0.628 | 0.409 | 0.977 | 0.967 | 0.166 |
| DB01400 | Neostigmine                                                                                            | 0.426 | 0.678  | 0.479  | -0.625 | 0.377  | 0.744 | 0.748 | 0.561 | 0.139 | 0.581 |
| DB00093 | Felypressin                                                                                            | 0.429 | 0.63   | -0.404 | -0.939 | 0.576  | 0.541 | 0.644 | 0.348 | 0.296 | 0.585 |
| DB00586 | Diclofenac                                                                                             | 0.43  | -0.772 | 3.637  | 1.043  | 0.223  | 0.642 | 0.183 | 0.999 | 0.844 | 0.525 |
| DB06820 | Sulconazole                                                                                            | 0.433 | 0.619  | 0.767  | 1.003  | -0.04  | 0.641 | 0.705 | 0.717 | 0.818 | 0.408 |

|         |                                                                                                                           |       |        |        |        |        |       |       |       |       |       |
|---------|---------------------------------------------------------------------------------------------------------------------------|-------|--------|--------|--------|--------|-------|-------|-------|-------|-------|
| DB07145 | (2R)-N-HYDROXY-2-[(3S)-3-METHYL-3-[4-<br>[(2-METHYLQUINOLIN-4-<br>YL)METHOXY]PHENYL]-2-<br>OXOPYRROLIDIN-1-YL]PROPANAMIDE | 0.433 | 0.143  | -1.823 | 0.579  | 0.448  | 0.631 | 0.513 | 0.022 | 0.58  | 0.574 |
| DB01393 | Bezafibrate                                                                                                               | 0.436 | -0.031 | 1.508  | 0.715  | 0.198  | 0.623 | 0.432 | 0.935 | 0.686 | 0.508 |
| DB01924 | Benzhydroxamic Acid                                                                                                       | 0.436 | 0.29   | 0.732  | -0.124 | 1.478  | 0.662 | 0.549 | 0.733 | 0.386 | 0.941 |
| DB00936 | Salicylic acid                                                                                                            | 0.438 | 1.063  | 2.155  | -1.071 | -0.844 | 0.622 | 0.819 | 0.963 | 0.101 | 0.144 |
| DB09121 | Aurothioglucose                                                                                                           | 0.438 | 0.793  | 0.638  | 0.742  | -0.233 | 0.794 | 0.838 | 0.629 | 0.565 | 0.359 |
| DB02058 | SU4984                                                                                                                    | 0.439 | 1.046  | 1.066  | 0.182  | -1.403 | 0.669 | 0.863 | 0.796 | 0.454 | 0.046 |
| DB03814 | 2-(N-Morpholino)-Ethanesulfonic Acid                                                                                      | 0.439 | -0.149 | 0.334  | 0.292  | -0.374 | 0.625 | 0.387 | 0.452 | 0.489 | 0.28  |
| DB01330 | Cefotetan                                                                                                                 | 0.441 | 0.407  | -0.012 | 1.248  | 0.109  | 0.618 | 0.616 | 0.158 | 0.775 | 0.437 |
| DB07959 | 3-(1H-BENZIMIDAZOL-2-YL)-1H-<br>INDAZOLE                                                                                  | 0.441 | 0.443  | 0.916  | -0.398 | 0.246  | 0.672 | 0.625 | 0.546 | 0.268 | 0.52  |
| DB07964 | (3S)-4-[[4-(BUT-2-<br>YNYLOXY)PHENYL]SULFONYL]-N-<br>HYDROXY-2,2-<br>DIMETHYLTHIOMORPHOLINE-3-<br>CARBOXAMIDE             | 0.441 | 0.768  | 0.336  | 0.518  | -0.397 | 0.658 | 0.761 | 0.492 | 0.442 | 0.268 |
| DB03014 |                                                                                                                           | 0.447 | 0.106  | 1.781  | 0.226  | -0.29  | 0.649 | 0.49  | 0.956 | 0.514 | 0.336 |
| DB00154 | Dihomo-gamma-linolenic acid                                                                                               | 0.458 | 0.814  | 3.215  | -0.818 | -0.6   | 0.743 | 0.826 | 0.991 | 0.114 | 0.197 |
| DB00925 | Phenoxybenzamine                                                                                                          | 0.459 | 0.397  | 0.667  | 1.959  | -0.322 | 0.67  | 0.614 | 0.648 | 0.97  | 0.298 |
| DB07835 | N-3--cyclopropyl-N-4-'<br>(cyclopropylmethyl)-6-methylbiphenyl-<br>3,4'-dicarboxamide                                     | 0.459 | 0.466  | 1.447  | 0.452  | -0.19  | 0.673 | 0.632 | 0.927 | 0.586 | 0.273 |
| DB01113 | Papaverine                                                                                                                | 0.46  | 0.743  | -2.423 | 0.58   | 1.58   | 0.659 | 0.766 | 0.005 | 0.668 | 0.957 |
| DB00471 | Montelukast                                                                                                               | 0.462 | 0.91   | 0.406  | 1.278  | -0.666 | 0.66  | 0.823 | 0.578 | 0.882 | 0.175 |
| DB00774 | Hydroflumethiazide                                                                                                        | 0.467 | 0.858  | 1.768  | 0.098  | -0.653 | 0.622 | 0.757 | 0.93  | 0.411 | 0.174 |
| DB00266 | Dicoumarol                                                                                                                | 0.469 | 1.552  | 0.036  | -0.43  | -0.293 | 0.642 | 0.944 | 0.359 | 0.271 | 0.288 |
| DB08030 | 3-[(4'-cyanobiphenyl-4-yl)oxy]-N-<br>hydroxypropanamide                                                                   | 0.469 | 0.387  | -0.337 | 0.964  | 0.795  | 0.652 | 0.594 | 0.099 | 0.649 | 0.712 |
| DB00515 | Cisplatin                                                                                                                 | 0.471 | 0.713  | 1.365  | 1.566  | -0.429 | 0.664 | 0.75  | 0.875 | 0.923 | 0.239 |
| DB03783 | Phenacetin                                                                                                                | 0.471 | 0.576  | 1.287  | -0.336 | 0.236  | 0.539 | 0.59  | 0.748 | 0.375 | 0.458 |
| DB07477 | Felbinac                                                                                                                  | 0.471 | 0.576  | 1.287  | -0.336 | 0.236  | 0.539 | 0.59  | 0.748 | 0.375 | 0.458 |
| DB06883 | 1-[1-(3-aminophenyl)-3-tert-butyl-1H-<br>pyrazol-5-yl]-3-phenylurea                                                       | 0.473 | 0.579  | 0.889  | 0.302  | -0.13  | 0.666 | 0.705 | 0.578 | 0.534 | 0.313 |
| DB00399 | Zoledronic acid                                                                                                           | 0.474 | 0.549  | -0.222 | -0.128 | 0.706  | 0.642 | 0.643 | 0.168 | 0.324 | 0.683 |
| DB06882 | 1-[1-(3-aminophenyl)-3-tert-butyl-1H-<br>pyrazol-5-yl]-3-naphthalen-1-ylurea                                              | 0.477 | 0.257  | 0.987  | 0.724  | 0.064  | 0.661 | 0.524 | 0.626 | 0.706 | 0.429 |
| DB06945 | N-hydroxy-4-({4-[4-<br>(trifluoromethyl)phenoxy]phenyl)sulfonyl<br>)tetrahydro-2H-pyran-4-carboxamide                     | 0.477 | 0.171  | -0.595 | 1.106  | 0.747  | 0.638 | 0.491 | 0.118 | 0.755 | 0.7   |
| DB11359 | Guaiacol                                                                                                                  | 0.478 | 0.148  | 2.105  | -1.037 | -0.73  | 0.697 | 0.525 | 0.969 | 0.082 | 0.149 |
| DB05990 | Obeticholic acid                                                                                                          | 0.479 | 0.839  | 0.923  | -0.251 | 0.068  | 0.753 | 0.777 | 0.768 | 0.397 | 0.718 |
| DB00906 | Tiagabine                                                                                                                 | 0.484 | 0.41   | 0.695  | 0.979  | 0.273  | 0.549 | 0.55  | 0.517 | 0.788 | 0.447 |
| DB03946 | 3,4-Dihydroxybenzoic Acid                                                                                                 | 0.484 | 1.282  | 1.448  | -1.137 | -0.591 | 0.663 | 0.87  | 0.855 | 0.108 | 0.192 |
| DB01044 | Gatifloxacin                                                                                                              | 0.488 | 0.93   | 0.814  | -0.986 | -0.335 | 0.666 | 0.813 | 0.694 | 0.105 | 0.293 |
| DB08930 | Dolutegravir                                                                                                              | 0.489 | 0.793  | 1.357  | -0.166 | 0.013  | 0.561 | 0.71  | 0.769 | 0.438 | 0.44  |
| DB04725 | Licofelone                                                                                                                | 0.491 | 0.751  | 1.654  | -0.72  | -0.435 | 0.737 | 0.754 | 0.913 | 0.141 | 0.256 |
| DB01611 | Hydroxychloroquine                                                                                                        | 0.492 | 0.668  | 0.991  | 1.31   | -0.757 | 0.645 | 0.698 | 0.739 | 0.887 | 0.157 |
| DB00125 | L-Arginine                                                                                                                | 0.494 | 1.092  | 1.227  | 1.192  | -2.206 | 0.65  | 0.822 | 0.83  | 0.861 | 0.009 |
| DB00491 | Miglitol                                                                                                                  | 0.499 | 1.796  | 0.303  | 0.441  | -1.854 | 0.667 | 0.952 | 0.488 | 0.561 | 0.024 |
| DB06684 | Vilazodone                                                                                                                | 0.5   | 0.721  | 1.733  | 0.093  | -0.399 | 0.731 | 0.747 | 0.913 | 0.316 | 0.254 |

|         |                                                                                                                    |       |        |        |        |        |       |       |       |       |       |
|---------|--------------------------------------------------------------------------------------------------------------------|-------|--------|--------|--------|--------|-------|-------|-------|-------|-------|
| DB02367 | (1n)-4-N-Butoxyphenylsulfonyl-(2r)-N-Hydroxycarboxamido-(4s)-Methanesulfonylamino-Pyrrolidine                      | 0.501 | 0.506  | -0.41  | 0.846  | 0.694  | 0.66  | 0.649 | 0.099 | 0.589 | 0.66  |
| DB01025 | Amlexanox                                                                                                          | 0.504 | 1.242  | -0.322 | 0.949  | -0.812 | 0.654 | 0.872 | 0.206 | 0.738 | 0.143 |
| DB00549 | Zafirlukast                                                                                                        | 0.505 | 0.553  | 2.209  | 1.46   | -0.461 | 0.688 | 0.699 | 0.98  | 0.907 | 0.226 |
| DB04338 | SB220025                                                                                                           | 0.506 | 0.141  | 0.89   | 0.567  | 0.267  | 0.673 | 0.464 | 0.542 | 0.649 | 0.51  |
| DB08521 | 4-[5-(4-FLUORO-PHENYL)-2-(4-METHANESULFINYL-PHENYL)-3H-IMIDAZOL-4-YL]-PYRIDINE                                     | 0.506 | 0.141  | 0.89   | 0.567  | 0.267  | 0.673 | 0.464 | 0.542 | 0.649 | 0.51  |
| DB00214 | Torasemide                                                                                                         | 0.507 | 0.58   | 1.05   | 0.179  | 0.273  | 0.566 | 0.641 | 0.872 | 0.429 | 0.447 |
| DB06201 | Rufinamide                                                                                                         | 0.508 | 1.278  | -0.912 | 0.967  | -0.117 | 0.793 | 0.919 | 0.067 | 0.747 | 0.402 |
| DB01197 | Captopril                                                                                                          | 0.51  | 0.132  | 1.538  | 1.087  | 1.145  | 0.646 | 0.505 | 0.911 | 0.844 | 0.827 |
| DB02481 | N-Benzylformamide                                                                                                  | 0.51  | 0.619  | 1.416  | 0.312  | 0.237  | 0.613 | 0.645 | 0.877 | 0.598 | 0.567 |
| DB08080 | LATRUNCULIN B                                                                                                      | 0.52  | 1.033  | 2.421  | 0.103  | -1.197 | 0.708 | 0.835 | 0.979 | 0.404 | 0.073 |
| DB08889 | Carfilzomib                                                                                                        | 0.52  | 0.107  | -0.256 | -0.13  | 0.398  | 0.699 | 0.485 | 0.237 | 0.397 | 0.603 |
| DB00583 | Levocarnitine                                                                                                      | 0.521 | 0.312  | 1.175  | 0.574  | -0.671 | 0.65  | 0.558 | 0.808 | 0.568 | 0.167 |
| DB02071 | WAY-151693                                                                                                         | 0.521 | 1.068  | 0.423  | 0.684  | -0.246 | 0.701 | 0.843 | 0.52  | 0.516 | 0.337 |
| DB00574 | Fenfluramine                                                                                                       | 0.522 | 0      | 0.331  | 1.737  | -0.776 | 0.66  | 0.441 | 0.539 | 0.956 | 0.168 |
| DB01112 | Cefuroxime                                                                                                         | 0.523 | 0.866  | -0.052 | 0.231  | 0.303  | 0.648 | 0.77  | 0.139 | 0.404 | 0.527 |
| DB02350 | N-Hydroxy-4-[(4-Methoxyphenyl)Sulfonyl]-2,2-Dimethyl-Hexahydro-1,4-Thiazepine-3(S)-Carboxamide                     | 0.523 | 0.321  | -0.425 | 1.04   | 0.949  | 0.641 | 0.559 | 0.105 | 0.694 | 0.766 |
| DB08567 |                                                                                                                    | 0.525 | 1.147  | 0.583  | 0.427  | -0.68  | 0.775 | 0.902 | 0.638 | 0.523 | 0.142 |
| DB07767 | Ferulic acid                                                                                                       | 0.526 | 1.277  | 0.925  | -1.184 | -0.667 | 0.673 | 0.873 | 0.722 | 0.099 | 0.186 |
| DB08056 | N-(2,6-dimethylphenyl)-5-phenylimidazo[1,5-a]pyrazin-8-amine                                                       | 0.526 | 0.727  | 0.667  | 0.52   | 0.024  | 0.725 | 0.771 | 0.399 | 0.617 | 0.394 |
| DB00133 | Serine                                                                                                             | 0.527 | -0.248 | 1.692  | 1.39   | 0.486  | 0.659 | 0.339 | 0.916 | 0.886 | 0.59  |
| DB03148 | Phosphomethylphosphonic Acid Adenosyl Ester                                                                        | 0.528 | 0.679  | 1.157  | 0.393  | 0.147  | 0.64  | 0.677 | 0.787 | 0.649 | 0.563 |
| DB00636 | Clofibrate                                                                                                         | 0.536 | 0.845  | 0.66   | 0.055  | 0.49   | 0.828 | 0.851 | 0.762 | 0.576 | 0.832 |
| DB09422 | Soybean oil                                                                                                        | 0.536 | 0.845  | 0.66   | 0.055  | 0.49   | 0.828 | 0.851 | 0.762 | 0.576 | 0.832 |
| DB00252 | Phenytoin                                                                                                          | 0.538 | 0.794  | 2.542  | 2.231  | -1.522 | 0.654 | 0.739 | 0.988 | 0.994 | 0.058 |
| DB00942 | Cycrimine                                                                                                          | 0.541 | 0.839  | 0.358  | -0.899 | 0.496  | 0.594 | 0.754 | 0.515 | 0.285 | 0.566 |
| DB01852 | Kaempferol                                                                                                         | 0.541 | 0.233  | -1.692 | 0.898  | 0.819  | 0.698 | 0.529 | 0.028 | 0.778 | 0.789 |
| DB00422 | Methylphenidate                                                                                                    | 0.545 | 0.862  | 2.433  | 0.098  | -0.523 | 0.746 | 0.795 | 0.976 | 0.281 | 0.212 |
| DB06769 | Bendamustine                                                                                                       | 0.546 | 0.453  | 0.717  | -0.022 | 1.413  | 0.709 | 0.644 | 0.721 | 0.427 | 0.937 |
| DB08809 | Dichloroacetic acid                                                                                                | 0.547 | 1.101  | -0.108 | 0.455  | -0.485 | 0.682 | 0.836 | 0.167 | 0.51  | 0.24  |
| DB08828 | Vismodegib                                                                                                         | 0.547 | 0.911  | -0.111 | -0.833 | -0.139 | 0.696 | 0.8   | 0.153 | 0.127 | 0.359 |
| DB07537 | N'-(6-aminopyridin-3-yl)-N-(2-cyclopentylethyl)-4-methyl-benzene-1,3-dicarboxamide                                 | 0.549 | 0.443  | 1.045  | -0.131 | 0.221  | 0.697 | 0.656 | 0.63  | 0.382 | 0.493 |
| DB00401 | Nisoldipine                                                                                                        | 0.55  | 0.093  | 1.139  | 1.526  | 0.265  | 0.666 | 0.486 | 0.815 | 0.908 | 0.507 |
| DB00802 | Alfentanil                                                                                                         | 0.551 | 1.017  | -0.361 | 0.766  | 0.121  | 0.827 | 0.892 | 0.08  | 0.581 | 0.521 |
| DB01209 | Dezocine                                                                                                           | 0.552 | 1.059  | -0.389 | 0.671  | -0.005 | 0.868 | 0.905 | 0.087 | 0.542 | 0.491 |
| DB02656 | LY-294002                                                                                                          | 0.554 | -0.679 | -0.39  | 0.894  | 2.19   | 0.717 | 0.152 | 0.268 | 0.773 | 0.991 |
| DB06896 | 1-(4-fluorophenyl)-N-[3-fluoro-4-(1H-pyrrolo[2,3-b]pyridin-4-yloxy)phenyl]-2-oxo-1,2-dihydropyridine-3-carboxamide | 0.554 | 0.498  | -1.143 | 0.51   | 0.691  | 0.679 | 0.638 | 0.05  | 0.605 | 0.693 |
| DB01433 | Methadyl acetate                                                                                                   | 0.557 | 1.192  | -0.304 | 0.803  | -0.15  | 0.822 | 0.914 | 0.083 | 0.586 | 0.401 |
| DB00653 | Magnesium sulfate                                                                                                  | 0.559 | 1.085  | 1.186  | 0.902  | -0.597 | 0.713 | 0.834 | 0.806 | 0.716 | 0.196 |
| DB00763 | Methimazole                                                                                                        | 0.561 | 0.732  | 0.792  | 0.667  | 0.426  | 0.76  | 0.832 | 0.782 | 0.73  | 0.639 |

|         |                                                                                                                                          |       |        |        |        |        |       |       |       |       |       |
|---------|------------------------------------------------------------------------------------------------------------------------------------------|-------|--------|--------|--------|--------|-------|-------|-------|-------|-------|
| DB07211 | (2R)-2-(5-CHLORO-2-THIENYL)-N-((3S)-1-<br>[(1S)-1-METHYL-2-MORPHOLIN-4-YL-2-<br>OXOETHYL]-2-OXOPYRROLIDIN-3-<br>YL)PROPENE-1-SULFONAMIDE | 0.562 | 0.735  | 1.636  | -0.612 | 0.241  | 0.711 | 0.736 | 0.879 | 0.146 | 0.511 |
| DB01576 | Dextroamphetamine                                                                                                                        | 0.565 | 0.566  | 0.98   | 0.168  | -0.844 | 0.737 | 0.686 | 0.763 | 0.309 | 0.115 |
| DB08689 | UBIQUINONE-1                                                                                                                             | 0.568 | 0.756  | 0.488  | 1.005  | -0.473 | 0.728 | 0.76  | 0.507 | 0.683 | 0.243 |
| DB03977 | N-Trimethyllysine                                                                                                                        | 0.569 | 0.191  | 0.554  | 1.77   | 0.677  | 0.731 | 0.528 | 0.362 | 0.926 | 0.742 |
| DB09473 | Indium In-111 oxyquinoline                                                                                                               | 0.571 | 0.544  | -0.219 | 0.095  | 1.092  | 0.711 | 0.664 | 0.256 | 0.445 | 0.856 |
| DB00279 | Liothyronine                                                                                                                             | 0.572 | 0.239  | 1.077  | 0.573  | 1.492  | 0.706 | 0.526 | 0.778 | 0.652 | 0.954 |
| DB07752 |                                                                                                                                          | 0.576 | 1.352  | 2.293  | 1.768  | -0.713 | 0.675 | 0.891 | 0.995 | 0.926 | 0.18  |
| DB00819 | Acetazolamide                                                                                                                            | 0.577 | 0.877  | 0.523  | 0.269  | 0.169  | 0.681 | 0.768 | 0.604 | 0.518 | 0.466 |
| DB01962 | Phosphotyrosine                                                                                                                          | 0.577 | 1.135  | -0.713 | 0.197  | 0.134  | 0.737 | 0.892 | 0.107 | 0.485 | 0.448 |
| DB08907 | Canagliflozin                                                                                                                            | 0.579 | 0.751  | 1.309  | 0.452  | 0.44   | 0.6   | 0.679 | 0.77  | 0.588 | 0.549 |
| DB00822 | Disulfiram                                                                                                                               | 0.583 | 0.138  | -0.576 | 1.039  | 0.44   | 0.705 | 0.483 | 0.238 | 0.843 | 0.622 |
| DB08597 | 6-[4-(2-piperidin-1-ylethoxy)phenyl]-3-<br>pyridin-4-ylpyrazolo[1,5-a]pyrimidine                                                         | 0.583 | 1.278  | 1.264  | -0.337 | 0.217  | 0.697 | 0.906 | 0.801 | 0.304 | 0.536 |
| DB11561 | Aminacrine                                                                                                                               | 0.585 | 0.084  | 1.319  | 0.244  | 1.24   | 0.703 | 0.451 | 0.898 | 0.51  | 0.888 |
| DB09016 | Butriptyline                                                                                                                             | 0.586 | 0.817  | 0.402  | 0.094  | -0.901 | 0.799 | 0.813 | 0.562 | 0.284 | 0.116 |
| DB00167 | Isoleucine                                                                                                                               | 0.592 | 1.459  | 0.718  | 0.195  | -1.682 | 0.681 | 0.896 | 0.639 | 0.414 | 0.03  |
| DB02944 |                                                                                                                                          | 0.594 | -0.115 | 1.171  | -0.121 | 1.085  | 0.699 | 0.388 | 0.849 | 0.384 | 0.86  |
| DB01092 | Ouabain                                                                                                                                  | 0.596 | 0.993  | -1.073 | -1.237 | 1.083  | 0.719 | 0.876 | 0.104 | 0.081 | 0.875 |
| DB09421 | Protirelin                                                                                                                               | 0.598 | 0.707  | 1.05   | -0.141 | 0.344  | 0.626 | 0.72  | 0.872 | 0.329 | 0.475 |
| DB00512 | Vancomycin                                                                                                                               | 0.602 | 0.75   | 1.778  | -0.854 | 0.717  | 0.634 | 0.674 | 0.873 | 0.171 | 0.653 |
| DB04875 | Pralnacasan                                                                                                                              | 0.602 | 1.301  | 1.141  | -0.251 | -1.384 | 0.713 | 0.888 | 0.795 | 0.319 | 0.047 |
| DB00943 | Zalcitabine                                                                                                                              | 0.604 | 0.352  | -0.68  | -0.516 | 0.38   | 0.709 | 0.597 | 0.194 | 0.223 | 0.542 |
| DB00272 | Betazole                                                                                                                                 | 0.605 | 0.816  | 1.138  | 0.667  | 0.36   | 0.796 | 0.88  | 0.906 | 0.73  | 0.586 |
| DB08806 | Roxatidine acetate                                                                                                                       | 0.605 | 0.816  | 1.138  | 0.667  | 0.36   | 0.796 | 0.88  | 0.906 | 0.73  | 0.586 |
| DB08568 | (2S)-1-[[5-(3-METHYL-1H-INDAZOL-5-<br>YL)PYRIDIN-3-YL]OXY]-3-PHENYLPROPAN-<br>2-AMINE                                                    | 0.607 | 0.047  | -1.322 | 0.093  | 0.176  | 0.708 | 0.423 | 0.071 | 0.454 | 0.51  |
| DB09211 | Limaprost                                                                                                                                | 0.608 | 1      | -0.244 | 0.595  | -0.036 | 0.811 | 0.862 | 0.251 | 0.532 | 0.418 |
| DB00144 | Phosphatidyl serine                                                                                                                      | 0.609 | 1.244  | -1.357 | -0.256 | 0.396  | 0.741 | 0.903 | 0.065 | 0.273 | 0.583 |
| DB07950 | Indoleacetic acid                                                                                                                        | 0.61  | 0.006  | 0.013  | 1.47   | 1.285  | 0.751 | 0.463 | 0.315 | 0.871 | 0.886 |
| DB00390 | Digoxin                                                                                                                                  | 0.611 | 0.497  | -1.37  | -0.879 | 0.817  | 0.736 | 0.674 | 0.057 | 0.14  | 0.762 |
| DB04513 | N-(6-Aminoethyl)-5-Chloro-1-<br>Naphthalenesulfonamide                                                                                   | 0.611 | 0.311  | 0.42   | 1.661  | 0.682  | 0.779 | 0.571 | 0.361 | 0.923 | 0.719 |
| DB01268 | Sunitinib                                                                                                                                | 0.614 | -0.569 | -0.121 | 0.179  | 1.074  | 0.736 | 0.157 | 0.428 | 0.469 | 0.964 |
| DB04898 | Ximelagatran                                                                                                                             | 0.616 | 0.675  | 0.693  | -0.223 | 0.057  | 0.702 | 0.696 | 0.622 | 0.338 | 0.426 |
| DB05521 | Telaprevir                                                                                                                               | 0.617 | 0.348  | 1.017  | -0.259 | 0.6    | 0.678 | 0.589 | 0.782 | 0.311 | 0.663 |
| DB00182 | Amphetamine                                                                                                                              | 0.62  | 0.936  | 0.163  | 0.566  | -1.463 | 0.698 | 0.801 | 0.484 | 0.629 | 0.05  |
| DB05265 | Ecabet                                                                                                                                   | 0.621 | 0.58   | 0.695  | 0.979  | 0.485  | 0.642 | 0.641 | 0.517 | 0.788 | 0.571 |
| DB06712 | Nilvadipine                                                                                                                              | 0.625 | 0.902  | 1.922  | 1.185  | -0.693 | 0.687 | 0.79  | 0.946 | 0.83  | 0.189 |
| DB04216 | Quercetin                                                                                                                                | 0.629 | -0.447 | -0.139 | 0.83   | 1.641  | 0.699 | 0.224 | 0.407 | 0.811 | 0.979 |
| DB09068 | Vortioxetine                                                                                                                             | 0.629 | 0.252  | -0.781 | 1.91   | -0.082 | 0.693 | 0.537 | 0.14  | 0.97  | 0.395 |
| DB00208 | Ticlopidine                                                                                                                              | 0.633 | 0.719  | 2.663  | -0.078 | -0.67  | 0.767 | 0.806 | 0.995 | 0.361 | 0.174 |
| DB00219 | Oxyphenonium                                                                                                                             | 0.633 | 0.823  | 0.369  | -0.54  | -0.281 | 0.787 | 0.812 | 0.484 | 0.167 | 0.308 |
| DB03585 | Oxyphenbutazone                                                                                                                          | 0.635 | 0.413  | 1.674  | 0.729  | 1.056  | 0.744 | 0.621 | 0.954 | 0.704 | 0.848 |
| DB03777 | Rbt205 Inhibitor                                                                                                                         | 0.635 | -0.031 | -0.472 | -0.582 | 1.81   | 0.746 | 0.386 | 0.214 | 0.236 | 0.967 |
| DB07080 | N-(2,2,2-TRIFLUOROETHYL)-N-(4-[2,2,2-<br>TRIFLUORO-1-HYDROXY-1-<br>(TRIFLUOROMETHYL)ETHYL]PHENYL)BEN<br>ZENESULFONAMIDE                  | 0.636 | 1.005  | 0.424  | 2.136  | -1.445 | 0.707 | 0.798 | 0.341 | 0.968 | 0.06  |
| DB00479 | Amikacin                                                                                                                                 | 0.642 | 0.806  | 2.013  | 0.067  | -0.006 | 0.779 | 0.795 | 0.923 | 0.54  | 0.649 |
| DB07514 | 3-(2-aminoquinazolin-6-yl)-1-(3,3-<br>dimethylindolin-6-yl)-4-methylpyridin-<br>2(1H)-one                                                | 0.644 | 0.849  | -0.529 | 0.261  | 0.366  | 0.754 | 0.818 | 0.159 | 0.522 | 0.552 |
| DB08621 | Thiamphenicol                                                                                                                            | 0.649 | 0.9    | 0.792  | 0.667  | 0.426  | 0.818 | 0.906 | 0.782 | 0.73  | 0.639 |

|         |                                                                                                       |       |        |        |        |        |       |       |       |       |       |
|---------|-------------------------------------------------------------------------------------------------------|-------|--------|--------|--------|--------|-------|-------|-------|-------|-------|
| DB01137 | Levofloxacin                                                                                          | 0.652 | 0.466  | 1.156  | -0.284 | 0.787  | 0.693 | 0.609 | 0.799 | 0.325 | 0.699 |
| DB07528 | 3-(2-aminoquinazolin-6-yl)-4-methyl-1-[3-(trifluoromethyl)phenyl]pyridin-2(1H)-one                    | 0.655 | 0.64   | 0.037  | 0.353  | 0.447  | 0.741 | 0.724 | 0.343 | 0.578 | 0.631 |
| DB04842 | Fluspirilene                                                                                          | 0.657 | 0.045  | 1.699  | 2.188  | 0.46   | 0.722 | 0.467 | 0.973 | 0.994 | 0.611 |
| DB01002 | Levobupivacaine                                                                                       | 0.661 | 1.229  | -1.847 | -0.083 | 0.678  | 0.694 | 0.86  | 0.017 | 0.34  | 0.666 |
| DB06186 | Ipilimumab                                                                                            | 0.663 | 0.91   | 0.184  | -0.087 | 0.65   | 0.642 | 0.72  | 0.563 | 0.556 | 0.64  |
| DB00089 | Capromab pendetide                                                                                    | 0.664 | 0.537  | -0.293 | 0.403  | 0.748  | 0.67  | 0.602 | 0.296 | 0.518 | 0.704 |
| DB00713 | Oxacillin                                                                                             | 0.665 | 1.064  | 1.583  | -0.617 | -0.641 | 0.726 | 0.834 | 0.901 | 0.16  | 0.2   |
| DB09289 | Tianeptine                                                                                            | 0.665 | 1.281  | -0.455 | 0.721  | 0.013  | 0.891 | 0.923 | 0.068 | 0.561 | 0.469 |
| DB03740 | N-acetyl-alpha-D-glucosamine                                                                          | 0.667 | 1.184  | 1.279  | 0.588  | -0.856 | 0.727 | 0.855 | 0.833 | 0.561 | 0.148 |
| DB00013 | Urokinase                                                                                             | 0.673 | -0.091 | 0.226  | 0.778  | 1.38   | 0.724 | 0.413 | 0.261 | 0.734 | 0.9   |
| DB00031 | Tenecteplase                                                                                          | 0.675 | 0.16   | 0.733  | 0.455  | 0.79   | 0.717 | 0.521 | 0.533 | 0.62  | 0.746 |
| DB02587 | Colforsin                                                                                             | 0.679 | 0.693  | 1.209  | 0.428  | 0.098  | 0.767 | 0.747 | 0.809 | 0.496 | 0.467 |
| DB01195 | Flecainide                                                                                            | 0.68  | -0.082 | 2.642  | 1.967  | 0.432  | 0.702 | 0.396 | 0.986 | 0.991 | 0.585 |
| DB04763 | 1-N-(4-SULFAMOYLPHENYL-ETHYL)-2,4,6-TRIMETHYLPYRIDINIUM                                               | 0.68  | 1.222  | 0.995  | 0.521  | -0.329 | 0.788 | 0.905 | 0.761 | 0.586 | 0.271 |
| DB06856 | 6-FLUORO-2-[2-HYDROXY-3-(2-METHYL-CYCLOHEXYLOXY)-PHENYL]-1H-INDOLE-5-CARBOXAMIDINE                    | 0.681 | 1.378  | -0.278 | -0.192 | -0.569 | 0.727 | 0.898 | 0.087 | 0.252 | 0.212 |
| DB01179 | Podofilox                                                                                             | 0.682 | 0.364  | -0.631 | -0.014 | 0.399  | 0.751 | 0.604 | 0.179 | 0.442 | 0.597 |
| DB00251 | Terconazole                                                                                           | 0.688 | 0.428  | 1.043  | 1.052  | 0.267  | 0.774 | 0.624 | 0.803 | 0.832 | 0.55  |
| DB00468 | Quinine                                                                                               | 0.688 | 0.776  | 0.923  | 0.668  | -0.458 | 0.722 | 0.738 | 0.871 | 0.661 | 0.267 |
| DB03255 | Phenol                                                                                                | 0.688 | 0.452  | 1.996  | -0.85  | -0.242 | 0.719 | 0.618 | 0.959 | 0.135 | 0.308 |
| DB07574 | 2-MERCAPTO-N-[1,2,3,10-TETRAMETHOXY-9-OXO-5,6,7,9-TETRAHYDRO-BENZO[A]HEPTALEN-7-YL]ACETAMIDE          | 0.692 | 1.015  | 2.03   | 0.565  | -0.707 | 0.807 | 0.859 | 0.995 | 0.65  | 0.155 |
| DB09069 | Trimetazidine                                                                                         | 0.692 | 0.913  | 0.758  | 0.333  | -0.282 | 0.803 | 0.827 | 0.674 | 0.392 | 0.309 |
| DB00036 | Coagulation factor VIIa Recombinant Human                                                             | 0.694 | 0.979  | 0.077  | 0.516  | -0.391 | 0.748 | 0.814 | 0.402 | 0.438 | 0.244 |
| DB01890 | N,N-Bis(3-(D-gluconamido)propyl)deoxycholamide                                                        | 0.697 | 1.254  | 0.326  | 0.828  | 0.13   | 0.907 | 0.933 | 0.527 | 0.761 | 0.589 |
| DB08875 | Cabozantinib                                                                                          | 0.697 | 0.601  | -0.865 | 0.883  | 0.87   | 0.727 | 0.672 | 0.087 | 0.737 | 0.759 |
| DB09331 | Daratumumab                                                                                           | 0.7   | 0.793  | -0.592 | 0.387  | 0.573  | 0.657 | 0.71  | 0.321 | 0.563 | 0.583 |
| DB00398 | Sorafenib                                                                                             | 0.701 | -0.05  | -0.205 | 0.676  | 0.118  | 0.743 | 0.366 | 0.378 | 0.787 | 0.49  |
| DB00589 | Lisuride                                                                                              | 0.704 | 0.284  | 1.651  | 2.169  | -0.144 | 0.721 | 0.572 | 0.925 | 0.99  | 0.358 |
| DB07235 | N-[(1S)-2-AMINO-1-(2,4-DICHLOROBENZYL)ETHYL]-5-[2-(METHYLAMINO)PYRIMIDIN-4-YL]THIOPHENE-2-CARBOXAMIDE | 0.705 | 0.552  | -0.707 | 0.935  | 0.83   | 0.769 | 0.688 | 0.169 | 0.783 | 0.789 |
| DB00842 | Oxazepam                                                                                              | 0.706 | 0.671  | 0.267  | -0.159 | 1.114  | 0.781 | 0.747 | 0.479 | 0.364 | 0.866 |
| DB00531 | Cyclophosphamide                                                                                      | 0.708 | 1.045  | -0.86  | 1.519  | 0.355  | 0.741 | 0.823 | 0.148 | 0.856 | 0.55  |
| DB01544 | Flunitrazepam                                                                                         | 0.711 | 0.177  | 2.066  | -0.006 | 0.072  | 0.736 | 0.513 | 0.957 | 0.334 | 0.439 |
| DB05665 |                                                                                                       | 0.712 | 0.81   | 2.525  | -0.33  | 1.613  | 0.713 | 0.737 | 0.986 | 0.293 | 0.929 |
| DB01039 | Fenofibrate                                                                                           | 0.713 | -0.192 | 1.501  | 1.661  | -0.81  | 0.728 | 0.384 | 0.906 | 0.942 | 0.165 |
| DB01006 | Letrozole                                                                                             | 0.714 | 1.184  | 1.853  | 0.054  | 0.454  | 0.721 | 0.803 | 0.925 | 0.659 | 0.705 |
| DB00255 | Diethylstilbestrol                                                                                    | 0.718 | 0.943  | 0.157  | 0.676  | -0.134 | 0.77  | 0.827 | 0.515 | 0.73  | 0.344 |
| DB01622 | Thiopropazine                                                                                         | 0.72  | 0.201  | 2.334  | 1.197  | -0.277 | 0.736 | 0.513 | 0.977 | 0.76  | 0.321 |
| DB00165 | Pyridoxine                                                                                            | 0.721 | -0.161 | 1.223  | 1.014  | 0.587  | 0.734 | 0.383 | 0.834 | 0.685 | 0.63  |
| DB00134 | Methionine                                                                                            | 0.722 | 0.682  | 0.791  | 0.585  | -0.363 | 0.745 | 0.724 | 0.668 | 0.509 | 0.281 |
| DB01346 | Quinidine barbiturate                                                                                 | 0.727 | 0.706  | 2.013  | 0.322  | -0.148 | 0.776 | 0.754 | 0.945 | 0.412 | 0.343 |
| DB01204 | Mitoxantrone                                                                                          | 0.73  | 0.868  | -0.309 | -0.298 | 0.062  | 0.76  | 0.801 | 0.323 | 0.297 | 0.453 |
| DB04242 | P-Hydroxybenzoic Acid                                                                                 | 0.731 | 1.368  | 1.42   | -0.635 | -0.893 | 0.727 | 0.895 | 0.873 | 0.168 | 0.129 |
| DB00524 | Metolazone                                                                                            | 0.734 | 1.558  | 1.005  | -0.516 | -1.194 | 0.729 | 0.933 | 0.77  | 0.193 | 0.083 |



|         |                                                                                               |       |        |        |        |        |       |       |       |       |       |
|---------|-----------------------------------------------------------------------------------------------|-------|--------|--------|--------|--------|-------|-------|-------|-------|-------|
| DB08424 | [5-AMINO-1-(4-FLUOROPHENYL)-1H-PYRAZOL-4-YL](3-[[2R)-2,3-DIHYDROXYPROPYL]OXY)PHENYL)METHANONE | 0.735 | 0.034  | 0.801  | 1.197  | 0.718  | 0.78  | 0.462 | 0.582 | 0.851 | 0.726 |
| DB01149 | Nefazodone                                                                                    | 0.736 | 0.64   | -0.072 | 0.456  | 0.838  | 0.814 | 0.724 | 0.362 | 0.603 | 0.794 |
| DB01186 | Pergolide                                                                                     | 0.738 | -0.267 | 2.318  | 1.951  | 0.27   | 0.737 | 0.332 | 0.978 | 0.992 | 0.504 |
| DB00734 | Risperidone                                                                                   | 0.741 | -0.045 | 1.478  | 2.505  | -0.067 | 0.749 | 0.417 | 0.901 | 0.992 | 0.417 |
| DB01064 | Isoprenaline                                                                                  | 0.741 | 0.931  | -1.004 | 0.697  | 1.114  | 0.797 | 0.853 | 0.13  | 0.751 | 0.873 |
| DB04160 | Pyrophosphoric acid                                                                           | 0.741 | 0.886  | 1.782  | 0.606  | -0.321 | 0.77  | 0.785 | 0.906 | 0.487 | 0.289 |
| DB00259 | Sulfanilamide                                                                                 | 0.742 | 1.455  | 1.578  | -0.299 | -0.508 | 0.733 | 0.894 | 0.904 | 0.305 | 0.231 |
| DB00311 | Ethoxzolamide                                                                                 | 0.742 | 1.455  | 1.578  | -0.299 | -0.508 | 0.733 | 0.894 | 0.904 | 0.305 | 0.231 |
| DB00391 | Sulpiride                                                                                     | 0.742 | 0.687  | 3.284  | -0.637 | -0.352 | 0.725 | 0.706 | 0.997 | 0.187 | 0.263 |
| DB00869 | Dorzolamide                                                                                   | 0.742 | 1.455  | 1.578  | -0.299 | -0.508 | 0.733 | 0.894 | 0.904 | 0.305 | 0.231 |
| DB01144 | Diclofenamide                                                                                 | 0.742 | 1.455  | 1.578  | -0.299 | -0.508 | 0.733 | 0.894 | 0.904 | 0.305 | 0.231 |
| DB01194 | Brinzolamide                                                                                  | 0.742 | 1.455  | 1.578  | -0.299 | -0.508 | 0.733 | 0.894 | 0.904 | 0.305 | 0.231 |
| DB08329 | Sulthiame                                                                                     | 0.742 | 1.455  | 1.578  | -0.299 | -0.508 | 0.733 | 0.894 | 0.904 | 0.305 | 0.231 |
| DB01110 | Miconazole                                                                                    | 0.743 | 0.418  | 0.549  | 1.224  | 0.355  | 0.79  | 0.637 | 0.678 | 0.936 | 0.585 |
| DB11093 | Calcium Citrate                                                                               | 0.743 | -0.095 | 2.04   | 0.853  | 1.733  | 0.792 | 0.369 | 0.975 | 0.792 | 0.963 |
| DB03468 | 1,2,3,4-Tetrahydro-Isoquinoline-7-Sulfonic Acid Amide                                         | 0.745 | 0.981  | 1.128  | -0.582 | 0.578  | 0.719 | 0.773 | 0.809 | 0.238 | 0.704 |
| DB03847 | Gamma-Carboxy-Glutamic Acid                                                                   | 0.745 | 0.634  | 0.38   | 0.634  | 0.12   | 0.751 | 0.71  | 0.485 | 0.479 | 0.458 |
| DB08550 | 7,8-Dichloro-1,2,3,4-tetrahydroisoquinoline                                                   | 0.745 | 0.981  | 1.128  | -0.582 | 0.578  | 0.719 | 0.773 | 0.809 | 0.238 | 0.704 |
| DB00206 | Reserpine                                                                                     | 0.746 | 0.549  | 1.13   | 0.498  | 0.437  | 0.75  | 0.671 | 0.923 | 0.656 | 0.628 |
| DB08985 | Etilefrine                                                                                    | 0.746 | 1.05   | 0.098  | -0.409 | 0.701  | 0.714 | 0.781 | 0.567 | 0.393 | 0.71  |
| DB00277 | Theophylline                                                                                  | 0.747 | 0.341  | -0.079 | 0.623  | 2.314  | 0.801 | 0.575 | 0.365 | 0.666 | 0.998 |
| DB07006 | 9-HYDROXY-6-(3-HYDROXYPROPYL)-4-(2-METHOXYPHENYL)PYRROLO[3,4-C]CARBAZOLE-1,3(2H,6H)-DIONE     | 0.748 | 1.104  | -0.639 | -1.003 | -0.133 | 0.758 | 0.842 | 0.202 | 0.107 | 0.363 |
| DB07265 | 3-(9-HYDROXY-1,3-DIOXO-4-PHENYL-2,3-DIHYDROPYRROLO[3,4-C]CARBAZOL-6(1H)-YL)PROPANOIC ACID     | 0.748 | 1.104  | -0.639 | -1.003 | -0.133 | 0.758 | 0.842 | 0.202 | 0.107 | 0.363 |
| DB00102 | Becaplermin                                                                                   | 0.75  | 0.865  | 1.29   | 1.593  | -1.56  | 0.75  | 0.766 | 0.89  | 0.865 | 0.038 |
| DB00995 | Auranofin                                                                                     | 0.75  | 0.71   | 0.617  | 0.199  | 0.524  | 0.806 | 0.746 | 0.607 | 0.507 | 0.653 |
| DB02325 | Isopropyl alcohol                                                                             | 0.75  | 0.059  | 0.081  | 0.163  | 0.535  | 0.738 | 0.449 | 0.368 | 0.487 | 0.65  |
| DB00091 | Ciclosporin                                                                                   | 0.752 | 1.097  | -0.115 | -0.509 | -0.753 | 0.738 | 0.82  | 0.142 | 0.23  | 0.17  |
| DB00939 | Meclofenamic acid                                                                             | 0.752 | 0.447  | 0.557  | 0.462  | 1.041  | 0.805 | 0.629 | 0.612 | 0.615 | 0.847 |
| DB04844 | Tetrabenazine                                                                                 | 0.753 | 0.954  | 4.403  | 0.552  | -0.357 | 0.789 | 0.794 | 0.999 | 0.46  | 0.283 |
| DB00425 | Zolpidem                                                                                      | 0.754 | 0.863  | 1.909  | 0.19   | 0.208  | 0.799 | 0.78  | 0.931 | 0.349 | 0.479 |
| DB00972 | Azelastine                                                                                    | 0.755 | 0.702  | 0.03   | 0.401  | -0.924 | 0.769 | 0.703 | 0.37  | 0.468 | 0.119 |
| DB06612 | Mepolizumab                                                                                   | 0.757 | 0.834  | 0.695  | 0.979  | 0.415  | 0.738 | 0.819 | 0.517 | 0.788 | 0.515 |
| DB00831 | Trifluoperazine                                                                               | 0.758 | -0.223 | 1.793  | 1.779  | 1.106  | 0.802 | 0.318 | 0.951 | 0.963 | 0.88  |
| DB01059 | Norfloxacin                                                                                   | 0.762 | 0.188  | 2.033  | -0.285 | 1.392  | 0.757 | 0.517 | 0.976 | 0.296 | 0.903 |
| DB08916 | Afatinib                                                                                      | 0.765 | 0.48   | 2.32   | -0.301 | 1.035  | 0.774 | 0.644 | 0.985 | 0.318 | 0.833 |
| DB03900 | 2-Methyl-2-Propanol                                                                           | 0.768 | 0.313  | 1.039  | 1.857  | 0.963  | 0.82  | 0.568 | 0.761 | 0.946 | 0.809 |
| DB08584 | 6-[[6-(1-methyl-1H-pyrazol-4-yl)[1,2,4]triazolo[4,3-b]pyridazin-3-yl]sulfanyl]quinoline       | 0.768 | 0.381  | 1.29   | 0.729  | 1.164  | 0.822 | 0.61  | 0.815 | 0.707 | 0.88  |
| DB04132 | S-Hexylglutathione                                                                            | 0.769 | 0.65   | 1.257  | -0.508 | -1.074 | 0.773 | 0.714 | 0.82  | 0.175 | 0.093 |
| DB01694 | D-tartaric acid                                                                               | 0.771 | 0.634  | 0.169  | -0.909 | 0.389  | 0.745 | 0.688 | 0.358 | 0.137 | 0.57  |
| DB05271 | Rotigotine                                                                                    | 0.778 | 1.2    | 2.584  | 0.972  | -0.465 | 0.765 | 0.856 | 0.985 | 0.762 | 0.246 |
| DB06854 |                                                                                               | 0.778 | 0.701  | -0.068 | -0.063 | 0.266  | 0.747 | 0.71  | 0.159 | 0.39  | 0.509 |
| DB00900 | Didanosine                                                                                    | 0.781 | -0.011 | 2.061  | -0.326 | -0.124 | 0.82  | 0.46  | 0.97  | 0.278 | 0.371 |
| DB08399 | PICEATANNOL                                                                                   | 0.781 | 1.331  | 0.674  | -1.638 | 0.064  | 0.74  | 0.872 | 0.388 | 0.029 | 0.467 |
| DB00317 | Gefitinib                                                                                     | 0.785 | 0.313  | 0.661  | 0.296  | 0.798  | 0.778 | 0.574 | 0.704 | 0.59  | 0.803 |
| DB01942 | Formic acid                                                                                   | 0.788 | -0.031 | 0.898  | 0.583  | 0.917  | 0.745 | 0.43  | 0.738 | 0.641 | 0.768 |
| DB00696 | Ergotamine                                                                                    | 0.792 | 0.689  | 0.713  | 1.264  | 0.55   | 0.826 | 0.751 | 0.69  | 0.89  | 0.675 |
| DB08846 | Ellagic Acid                                                                                  | 0.795 | 0.319  | 0.928  | 0.36   | 0.923  | 0.808 | 0.585 | 0.779 | 0.601 | 0.795 |

|         |                                                                                                  |       |        |        |        |        |       |       |       |       |       |
|---------|--------------------------------------------------------------------------------------------------|-------|--------|--------|--------|--------|-------|-------|-------|-------|-------|
| DB01191 | Dexfenfluramine                                                                                  | 0.797 | -0.025 | 1.203  | 1.592  | -0.232 | 0.756 | 0.406 | 0.833 | 0.953 | 0.335 |
| DB09067 | Corticotropin ovine triflutate                                                                   | 0.799 | 0.711  | 1.348  | 0.761  | 0.789  | 0.687 | 0.647 | 0.76  | 0.678 | 0.655 |
| DB07146 | 2,3-DIPHENYL-N-(2-PIPERAZIN-1-YLETHYL)FURO[2,3-B]PYRIDIN-4-AMINE                                 | 0.804 | 1.175  | 0.461  | 0.305  | -0.341 | 0.755 | 0.85  | 0.289 | 0.548 | 0.29  |
| DB01109 | Heparin                                                                                          | 0.807 | 0.849  | 0.786  | 1.341  | -0.421 | 0.768 | 0.759 | 0.673 | 0.891 | 0.275 |
| DB08996 | Dimetacrine                                                                                      | 0.812 | 0.809  | 0.959  | 0.437  | 0.724  | 0.69  | 0.687 | 0.73  | 0.652 | 0.654 |
| DB11598 | Antithrombin III human                                                                           | 0.813 | 1.032  | 1.379  | 0.76   | 0.664  | 0.727 | 0.786 | 0.837 | 0.753 | 0.692 |
| DB00270 | Isradipine                                                                                       | 0.815 | 0.596  | 2.195  | 0.853  | -0.292 | 0.762 | 0.662 | 0.968 | 0.637 | 0.296 |
| DB00929 | Misoprostol                                                                                      | 0.817 | 1.175  | 0.033  | 0.702  | -0.224 | 0.832 | 0.886 | 0.349 | 0.58  | 0.337 |
| DB00966 | Telmisartan                                                                                      | 0.819 | 0.603  | 2.25   | 1.975  | 0.073  | 0.763 | 0.659 | 0.985 | 0.967 | 0.457 |
| DB00793 | Haloproglin                                                                                      | 0.82  | 0.323  | 1.009  | 1.781  | -0.033 | 0.759 | 0.56  | 0.778 | 0.967 | 0.411 |
| DB00918 | Almotriptan                                                                                      | 0.821 | 0.936  | 0.631  | 0.586  | 1.024  | 0.728 | 0.746 | 0.705 | 0.718 | 0.774 |
| DB01124 | Tolbutamide                                                                                      | 0.823 | 0.476  | 2.177  | 0.597  | 0.034  | 0.85  | 0.689 | 0.966 | 0.671 | 0.459 |
| DB08059 | Wortmannin                                                                                       | 0.825 | -0.369 | 1.027  | 0.592  | 2.026  | 0.838 | 0.244 | 0.693 | 0.664 | 0.989 |
| DB00765 | Metyrosine                                                                                       | 0.827 | 1.078  | 0.676  | -0.622 | 0.984  | 0.752 | 0.791 | 0.73  | 0.122 | 0.783 |
| DB07772 | (1R)-1-[(4'-methoxy-1,1'-biphenyl-4-yl)sulfonyl]amino)-2-methylpropylphosphonic acid             | 0.829 | 0.535  | -0.321 | 1.251  | 1      | 0.765 | 0.645 | 0.128 | 0.78  | 0.791 |
| DB02721 | 4-Iodopyrazole                                                                                   | 0.831 | 1.076  | 1.645  | 0.534  | 0.561  | 0.742 | 0.787 | 0.874 | 0.71  | 0.713 |
| DB01363 | Ephedra sinica root                                                                              | 0.832 | 1.316  | -0.052 | 0.652  | -0.636 | 0.77  | 0.878 | 0.362 | 0.655 | 0.197 |
| DB00703 | Methazolamide                                                                                    | 0.834 | 0.977  | 1.766  | 0.424  | 0.404  | 0.75  | 0.798 | 0.93  | 0.577 | 0.593 |
| DB03608 | Diminazene                                                                                       | 0.836 | 0.258  | 1.656  | 1.722  | 0.682  | 0.775 | 0.547 | 0.915 | 0.965 | 0.673 |
| DB00220 | Nelfinavir                                                                                       | 0.838 | 1.084  | -0.31  | 1.073  | 0.357  | 0.836 | 0.882 | 0.324 | 0.827 | 0.587 |
| DB00423 | Methocarbamol                                                                                    | 0.838 | 0.678  | 1.227  | 0.741  | 0.748  | 0.759 | 0.682 | 0.913 | 0.665 | 0.704 |
| DB00903 | Etacrynic acid                                                                                   | 0.838 | 0.417  | 2.545  | 0.924  | -0.144 | 0.759 | 0.614 | 0.996 | 0.758 | 0.362 |
| DB09395 | Sodium acetate                                                                                   | 0.838 | 0.678  | 1.227  | 0.741  | 0.748  | 0.759 | 0.682 | 0.913 | 0.665 | 0.704 |
| DB00975 | Dipyridamole                                                                                     | 0.846 | 1.375  | -3.205 | -0.818 | 0.725  | 0.779 | 0.905 | 0     | 0.153 | 0.719 |
| DB00173 | Adenine                                                                                          | 0.847 | 1.402  | 0.845  | -0.074 | -0.029 | 0.873 | 0.941 | 0.677 | 0.357 | 0.381 |
| DB00055 | Drotrecogin alfa                                                                                 | 0.851 | 0.551  | 0.672  | 0.67   | 1.635  | 0.779 | 0.658 | 0.657 | 0.699 | 0.952 |
| DB02731 | Ethylmercurithiosalicylic acid                                                                   | 0.853 | 1.332  | 0.518  | 1.135  | -0.413 | 0.769 | 0.886 | 0.6   | 0.825 | 0.263 |
| DB01388 | Mibefradil                                                                                       | 0.857 | 0.897  | 1.097  | 1.264  | 0.968  | 0.85  | 0.819 | 0.875 | 0.894 | 0.842 |
| DB00654 | Latanoprost                                                                                      | 0.86  | 1.588  | 0.274  | 0.653  | -0.369 | 0.872 | 0.948 | 0.455 | 0.552 | 0.272 |
| DB06999 | N-{3-[(5-chloro-1H-pyrrolo[2,3-b]pyridin-3-yl)carbonyl]-2,4-difluorophenyl}propane-1-sulfonamide | 0.86  | 0.079  | 0.683  | 0.075  | 1.173  | 0.817 | 0.452 | 0.721 | 0.452 | 0.888 |
| DB01240 | Epoprostenol                                                                                     | 0.861 | 0.701  | 0.592  | 0.678  | 0.322  | 0.804 | 0.722 | 0.601 | 0.574 | 0.55  |
| DB09029 | Secukinumab                                                                                      | 0.863 | 0.968  | 0.931  | 0.564  | 0.805  | 0.721 | 0.74  | 0.719 | 0.663 | 0.68  |
| DB11569 | Ixekizumab                                                                                       | 0.863 | 0.968  | 0.931  | 0.564  | 0.805  | 0.721 | 0.74  | 0.719 | 0.663 | 0.68  |
| DB08865 | Crizotinib                                                                                       | 0.869 | 0.241  | 0.256  | 0.577  | 0.439  | 0.812 | 0.534 | 0.578 | 0.739 | 0.655 |
| DB07326 | 6-chloro-N-pyrimidin-5-yl-3-[(3-(trifluoromethyl)phenyl)amino]-1,2-benzisoxazole-7-carboxamide   | 0.87  | 1.143  | -0.475 | 0.535  | 0.1    | 0.865 | 0.892 | 0.175 | 0.635 | 0.449 |
| DB00738 | Pentamidine                                                                                      | 0.874 | 0.481  | 0.8    | 1.355  | 1.736  | 0.841 | 0.666 | 0.718 | 0.91  | 0.966 |
| DB04876 | Vildagliptin                                                                                     | 0.877 | 1.098  | -2.319 | 0.699  | 0.713  | 0.803 | 0.843 | 0.004 | 0.523 | 0.681 |
| DB04884 | Dapoxetine                                                                                       | 0.877 | 1.09   | 1.157  | -0.49  | 0.788  | 0.72  | 0.775 | 0.779 | 0.417 | 0.697 |
| DB00297 | Bupivacaine                                                                                      | 0.879 | 1.423  | -1.914 | 0.061  | 0.716  | 0.785 | 0.903 | 0.019 | 0.383 | 0.682 |
| DB00969 | Alosetron                                                                                        | 0.881 | 1.316  | 0.298  | 1.081  | -0.498 | 0.779 | 0.878 | 0.495 | 0.777 | 0.235 |
| DB00044 | Lutropin alfa                                                                                    | 0.882 | 1.088  | 0.45   | -0.325 | 0.909  | 0.726 | 0.796 | 0.597 | 0.48  | 0.713 |
| DB09126 | Chorionic Gonadotropin (Human)                                                                   | 0.882 | 1.088  | 0.45   | -0.325 | 0.909  | 0.726 | 0.796 | 0.597 | 0.48  | 0.713 |
| DB09283 | Trapidil                                                                                         | 0.882 | 1.105  | -0.186 | -0.204 | 0.231  | 0.779 | 0.833 | 0.343 | 0.32  | 0.494 |
| DB00718 | Adefovir dipivoxil                                                                               | 0.888 | 1.299  | 0.933  | 0.164  | 0.623  | 0.798 | 0.876 | 0.726 | 0.406 | 0.67  |
| DB08954 | Ifenprodil                                                                                       | 0.89  | 0.694  | 0.236  | 1.049  | 0.668  | 0.779 | 0.69  | 0.416 | 0.697 | 0.659 |
| DB00818 | Propofol                                                                                         | 0.891 | 0.348  | 2.583  | 0.112  | 0.095  | 0.801 | 0.587 | 0.994 | 0.452 | 0.458 |
| DB01095 | Fluvastatin                                                                                      | 0.892 | 1.339  | 1.714  | 1.019  | -0.675 | 0.773 | 0.879 | 0.909 | 0.664 | 0.178 |
| DB00007 | Leuprolide                                                                                       | 0.894 | 0.918  | 1.405  | 0.979  | 0.556  | 0.856 | 0.864 | 0.96  | 0.788 | 0.63  |
| DB00106 | Abarelix                                                                                         | 0.894 | 0.918  | 1.405  | 0.979  | 0.556  | 0.856 | 0.864 | 0.96  | 0.788 | 0.63  |
| DB00594 | Amiloride                                                                                        | 0.894 | -0.217 | 1.823  | 2.005  | 2.028  | 0.851 | 0.312 | 0.958 | 0.973 | 0.993 |

|         |                                                                                      |       |        |        |        |        |       |       |       |       |       |
|---------|--------------------------------------------------------------------------------------|-------|--------|--------|--------|--------|-------|-------|-------|-------|-------|
| DB00644 | Gonadorelin                                                                          | 0.894 | 0.918  | 1.405  | 0.979  | 0.556  | 0.856 | 0.864 | 0.96  | 0.788 | 0.63  |
| DB00666 | Nafarelin                                                                            | 0.894 | 0.918  | 1.405  | 0.979  | 0.556  | 0.856 | 0.864 | 0.96  | 0.788 | 0.63  |
| DB03496 | Alvocidib                                                                            | 0.894 | 0.498  | 0.059  | 0.095  | 0.181  | 0.811 | 0.666 | 0.464 | 0.464 | 0.52  |
| DB06699 | Degarelix                                                                            | 0.894 | 0.918  | 1.405  | 0.979  | 0.556  | 0.856 | 0.864 | 0.96  | 0.788 | 0.63  |
| DB06785 | Ganirelix                                                                            | 0.894 | 0.918  | 1.405  | 0.979  | 0.556  | 0.856 | 0.864 | 0.96  | 0.788 | 0.63  |
| DB06788 | Histrelin                                                                            | 0.894 | 0.918  | 1.405  | 0.979  | 0.556  | 0.856 | 0.864 | 0.96  | 0.788 | 0.63  |
| DB06825 | Triptorelin                                                                          | 0.894 | 0.918  | 1.405  | 0.979  | 0.556  | 0.856 | 0.864 | 0.96  | 0.788 | 0.63  |
| DB00429 | Carboprost tromethamine                                                              | 0.895 | 0.91   | 0.349  | 1.086  | 0.652  | 0.789 | 0.803 | 0.488 | 0.809 | 0.625 |
| DB06891 | 5-[(4-AMINO-3-CHLORO-5-FLUOROPHENYL)SULFONYL]AMINO)-1,3,4-THIADIAZOLE-2-SULFONAMIDE  | 0.896 | 1.375  | 1.331  | -0.181 | -0.127 | 0.786 | 0.902 | 0.841 | 0.318 | 0.338 |
| DB06795 | Mafenide                                                                             | 0.897 | 1.438  | 1.218  | -0.602 | -0.511 | 0.781 | 0.896 | 0.825 | 0.168 | 0.227 |
| DB06954 | 2-(cycloheptylmethyl)-1,1-dioxido-1-benzothiophen-6-yl sulfamate                     | 0.897 | 1.438  | 1.218  | -0.602 | -0.511 | 0.781 | 0.896 | 0.825 | 0.168 | 0.227 |
| DB08083 | 2-(1,3-thiazol-4-yl)-1H-benzimidazole-5-sulfonamide                                  | 0.897 | 1.438  | 1.218  | -0.602 | -0.511 | 0.781 | 0.896 | 0.825 | 0.168 | 0.227 |
| DB00239 | Oxiconazole                                                                          | 0.898 | 1.008  | 0.291  | 1.43   | -1.018 | 0.779 | 0.811 | 0.534 | 0.928 | 0.114 |
| DB00496 | Darifenacin                                                                          | 0.898 | 1.473  | -0.558 | 1.297  | -0.594 | 0.772 | 0.901 | 0.191 | 0.868 | 0.228 |
| DB01117 | Atovaquone                                                                           | 0.899 | 1.623  | -0.594 | -0.217 | 0.568  | 0.803 | 0.933 | 0.086 | 0.263 | 0.629 |
| DB07926 | N-[3-(N'-HYDROXYCARBOXAMIDO)-2-(2-METHYLPROPYL)-PROPANOYL]-O-TYROSINE-N-METHYLAMIDE  | 0.902 | 0.506  | -0.161 | 1.156  | 1.122  | 0.782 | 0.642 | 0.142 | 0.737 | 0.814 |
| DB08507 | N-[[2-METHYL-4-HYDROXYCARBAMOYL]BUT-4-YL-N]-BENZYL-P-[PHENYL]-P-[METHYL]PHOSPHINAMID | 0.902 | 0.506  | -0.161 | 1.156  | 1.122  | 0.782 | 0.642 | 0.142 | 0.737 | 0.814 |
| DB00187 | Esmolol                                                                              | 0.903 | 1.146  | 1.157  | -0.514 | 0.791  | 0.744 | 0.805 | 0.787 | 0.386 | 0.683 |
| DB07159 | Tamatinib                                                                            | 0.907 | -0.319 | 0.725  | 0.42   | 0.884  | 0.846 | 0.235 | 0.749 | 0.657 | 0.91  |
| DB01446 | Indopan                                                                              | 0.908 | 0.023  | 1.22   | 1.573  | 0.111  | 0.794 | 0.442 | 0.831 | 0.939 | 0.461 |
| DB08943 | Isoconazole                                                                          | 0.908 | 1.296  | -0.307 | 1.222  | 0.735  | 0.833 | 0.887 | 0.141 | 0.776 | 0.703 |
| DB00025 | Antihemophilic factor, human recombinant                                             | 0.914 | 1.266  | 0.673  | 1.198  | -0.488 | 0.837 | 0.898 | 0.579 | 0.851 | 0.232 |
| DB00982 | Isotretinoin                                                                         | 0.915 | 0.845  | 1.484  | 1.066  | 0.266  | 0.876 | 0.81  | 0.908 | 0.824 | 0.504 |
| DB09034 | Suvorexant                                                                           | 0.917 | 1.234  | 0.1    | -0.332 | 0.829  | 0.734 | 0.853 | 0.525 | 0.499 | 0.694 |
| DB01156 | Bupropion                                                                            | 0.918 | 1.267  | 0.401  | 0.669  | -0.288 | 0.792 | 0.876 | 0.546 | 0.625 | 0.298 |
| DB04572 | Thiotepa                                                                             | 0.918 | 1.344  | -0.583 | 0.877  | 0.245  | 0.847 | 0.913 | 0.127 | 0.697 | 0.531 |
| DB00287 | Travoprost                                                                           | 0.922 | 1.262  | 0.551  | 0.572  | -0.029 | 0.891 | 0.923 | 0.58  | 0.501 | 0.426 |
| DB05379 |                                                                                      | 0.922 | 1.262  | 0.551  | 0.572  | -0.029 | 0.891 | 0.923 | 0.58  | 0.501 | 0.426 |
| DB08877 | Ruxolitinib                                                                          | 0.922 | 0.385  | 1.288  | -0.042 | 0.102  | 0.832 | 0.603 | 0.873 | 0.373 | 0.489 |
| DB00226 | Guanadrel                                                                            | 0.924 | 0.938  | 0.608  | 0.608  | 0.544  | 0.752 | 0.75  | 0.701 | 0.724 | 0.684 |
| DB00629 | Guanabenz                                                                            | 0.924 | 0.458  | 1.517  | 0.894  | -0.282 | 0.799 | 0.627 | 0.883 | 0.661 | 0.289 |
| DB01088 | Iloprost                                                                             | 0.926 | 0.502  | 0.109  | 0.5    | 1.961  | 0.794 | 0.65  | 0.432 | 0.607 | 0.979 |
| DB00063 | Eptifibatide                                                                         | 0.927 | 1.216  | 0.603  | 0.067  | 0.818  | 0.808 | 0.837 | 0.716 | 0.54  | 0.807 |
| DB00161 | L-Valine                                                                             | 0.93  | 1.195  | 1.805  | 0.758  | -0.108 | 0.871 | 0.905 | 0.907 | 0.56  | 0.386 |
| DB00579 | Mazindol                                                                             | 0.933 | 1.295  | 0.21   | 0.154  | -0.504 | 0.86  | 0.924 | 0.46  | 0.318 | 0.217 |
| DB06016 | Cariprazine                                                                          | 0.935 | 0.233  | 0.635  | 1.209  | -0.078 | 0.809 | 0.514 | 0.613 | 0.799 | 0.385 |
| DB06637 | Dalfampridine                                                                        | 0.938 | 0.991  | 0.158  | 1.089  | 1.751  | 0.799 | 0.808 | 0.452 | 0.789 | 0.962 |
| DB00403 | Ceruletide                                                                           | 0.939 | 0.918  | 1.405  | 0.979  | 0.768  | 0.896 | 0.864 | 0.96  | 0.788 | 0.807 |
| DB04856 | Dexloxiglumide                                                                       | 0.939 | 0.918  | 1.405  | 0.979  | 0.768  | 0.896 | 0.864 | 0.96  | 0.788 | 0.807 |
| DB08765 | 6-HYDROXY-1,3-BENZOTHIAZOLE-2-SULFONAMIDE                                            | 0.94  | 1.37   | 0.87   | -0.034 | -0.51  | 0.816 | 0.894 | 0.7   | 0.382 | 0.232 |
| DB00561 | Doxapram                                                                             | 0.943 | 1.305  | 1.354  | -0.233 | 0.362  | 0.815 | 0.847 | 0.869 | 0.388 | 0.779 |
| DB00163 | Vitamin E                                                                            | 0.947 | 0.903  | -0.198 | 0.96   | 1.275  | 0.84  | 0.814 | 0.307 | 0.782 | 0.902 |
| DB00474 | Methohexital                                                                         | 0.947 | 0.73   | 1.812  | 1.113  | 0.938  | 0.742 | 0.671 | 0.881 | 0.788 | 0.729 |
| DB08965 | Fusafungine                                                                          | 0.949 | 0.972  | 1.3    | -0.348 | 1.284  | 0.892 | 0.854 | 0.913 | 0.267 | 0.912 |
| DB01021 | Trichlormethiazide                                                                   | 0.95  | 1.58   | 1.517  | -0.054 | -0.851 | 0.791 | 0.927 | 0.889 | 0.372 | 0.146 |
| DB01303 | Oxtriphylline                                                                        | 0.954 | 1.303  | 0.183  | 0.031  | 0.724  | 0.878 | 0.964 | 0.34  | 0.375 | 0.749 |
| DB01073 | Fludarabine                                                                          | 0.955 | 1.757  | -1.156 | -0.704 | 1.563  | 0.889 | 0.973 | 0.083 | 0.195 | 0.952 |
| DB00213 | Pantoprazole                                                                         | 0.959 | 1.063  | 2.345  | -0.697 | 0.562  | 0.807 | 0.812 | 0.978 | 0.191 | 0.636 |

|         |                                                                                                                      |       |       |        |        |        |       |       |       |       |       |
|---------|----------------------------------------------------------------------------------------------------------------------|-------|-------|--------|--------|--------|-------|-------|-------|-------|-------|
| DB06643 | Denosumab                                                                                                            | 0.96  | 1.089 | 0.314  | -0.22  | 0.904  | 0.813 | 0.808 | 0.655 | 0.429 | 0.802 |
| DB01445 | Bufotenine                                                                                                           | 0.963 | 0.601 | 1.234  | 0.715  | -0.115 | 0.86  | 0.685 | 0.795 | 0.532 | 0.378 |
| DB00310 | Chlorthalidone                                                                                                       | 0.965 | 1.368 | 1.42   | -0.635 | -0.479 | 0.808 | 0.895 | 0.873 | 0.168 | 0.226 |
| DB00166 | Lipoic Acid                                                                                                          | 0.967 | 1.007 | -0.597 | 0.687  | 0.258  | 0.806 | 0.813 | 0.2   | 0.705 | 0.522 |
| DB01161 | Chloroprocaine                                                                                                       | 0.967 | 1.41  | 0.552  | 0.296  | -0.114 | 0.907 | 0.94  | 0.589 | 0.439 | 0.382 |
| DB00197 | Troglitazone                                                                                                         | 0.969 | 0.307 | 0.389  | 0.802  | -0.328 | 0.852 | 0.572 | 0.546 | 0.736 | 0.302 |
| DB02078 | Triglyme                                                                                                             | 0.969 | 0.744 | 0.424  | 1.1    | 0.881  | 0.877 | 0.759 | 0.398 | 0.812 | 0.824 |
| DB04137 | Guanosine-5'-Triphosphate                                                                                            | 0.969 | 0.639 | -0.01  | -0.471 | 0.173  | 0.81  | 0.695 | 0.269 | 0.245 | 0.502 |
| DB00330 | Ethambutol                                                                                                           | 0.972 | 0.671 | 0.758  | 0.709  | -0.488 | 0.845 | 0.724 | 0.69  | 0.542 | 0.238 |
| DB00541 | Vincristine                                                                                                          | 0.974 | 0.838 | 0.554  | 0.661  | 1.21   | 0.92  | 0.829 | 0.481 | 0.681 | 0.903 |
| DB00021 |                                                                                                                      | 0.976 | 1.087 | 0.215  | 0.818  | 1.135  | 0.774 | 0.821 | 0.51  | 0.705 | 0.839 |
| DB04769 | 5-QUINOXALIN-6-YLMETHYLENE-THIAZOLIDINE-2,4-DIONE                                                                    | 0.976 | 0.735 | 0.817  | 1.091  | -0.177 | 0.808 | 0.716 | 0.663 | 0.684 | 0.33  |
| DB00273 | Topiramate                                                                                                           | 0.977 | 0.45  | 1.856  | 0.386  | 0.188  | 0.813 | 0.617 | 0.948 | 0.586 | 0.505 |
| DB00457 | Prazosin                                                                                                             | 0.983 | 0.331 | 1.809  | 1.595  | 0.578  | 0.816 | 0.559 | 0.95  | 0.955 | 0.664 |
| DB09038 | Empagliflozin                                                                                                        | 0.983 | 1.303 | 1.743  | 0.97   | 0.844  | 0.754 | 0.851 | 0.881 | 0.758 | 0.706 |
| DB00419 | Miglustat                                                                                                            | 0.984 | 2.147 | 0.957  | 0.335  | -2.243 | 0.813 | 0.981 | 0.729 | 0.456 | 0.011 |
| DB00709 | Lamivudine                                                                                                           | 0.984 | 0.641 | 1.926  | 0.171  | -0.266 | 0.863 | 0.74  | 0.955 | 0.428 | 0.317 |
| DB04829 | Lysergic acid diethylamide                                                                                           | 0.984 | 0.404 | 0.84   | 1.799  | -0.17  | 0.806 | 0.608 | 0.721 | 0.952 | 0.366 |
| DB06155 | Rimonabant                                                                                                           | 0.984 | 1.57  | 1.423  | -0.082 | -0.452 | 0.806 | 0.925 | 0.872 | 0.336 | 0.235 |
| DB01444 | Dimethylthiambutene                                                                                                  | 0.985 | 1.629 | -0.304 | 0.803  | 0.21   | 0.918 | 0.949 | 0.083 | 0.586 | 0.551 |
| DB07194 | 2-{2-[(3,5-dimethylphenyl)amino]pyrimidin-4-yl)-N-[(1S)-2-hydroxy-1-methylethyl]-4-methyl-1,3-thiazole-5-carboxamide | 0.985 | 0.944 | 0.227  | 1.571  | 0.115  | 0.809 | 0.802 | 0.207 | 0.858 | 0.475 |
| DB08213 | 1-METHYL-5-(2-PHENOXYMETHYL-PYRROLIDINE-1-SULFONYL)-1H-INDOLE-2,3-DIONE                                              | 0.985 | 1.247 | 1.224  | -0.023 | -0.316 | 0.809 | 0.88  | 0.839 | 0.399 | 0.309 |
| DB00940 | Methanetheline                                                                                                       | 0.995 | 1.378 | 0.765  | -0.504 | 0.957  | 0.773 | 0.902 | 0.66  | 0.415 | 0.751 |
| DB01223 | Aminophylline                                                                                                        | 0.995 | 1.442 | 0.056  | 0.08   | 0.859  | 0.907 | 0.974 | 0.327 | 0.407 | 0.788 |
| DB07794 | 5-(2-PHENYLPYRAZOLO[1,5-A]PYRIDIN-3-YL)-1H-PYRAZOLO[3,4-C]PYRIDAZIN-3-AMINE                                          | 0.996 | 0.751 | 1.211  | 1.076  | 0.638  | 0.911 | 0.757 | 0.708 | 0.827 | 0.733 |
| DB08403 | METHYLAMINO-PHENYLALANYL-LEUCYL-HYDROXAMIC ACID                                                                      | 1     | 0.713 | 0.556  | 1.15   | 1.169  | 0.813 | 0.711 | 0.552 | 0.732 | 0.83  |
| DB00642 | Pemetrexed                                                                                                           | 1.002 | 0.447 | -0.663 | 0.828  | -0.117 | 0.817 | 0.617 | 0.304 | 0.712 | 0.371 |
| DB01238 | Aripiprazole                                                                                                         | 1.002 | 0.276 | 0.652  | 1.63   | 0.241  | 0.83  | 0.557 | 0.67  | 0.954 | 0.516 |
| DB01326 | Cefamandole                                                                                                          | 1.004 | 1.314 | 0.881  | -0.209 | 1.522  | 0.895 | 0.904 | 0.725 | 0.322 | 0.949 |
| DB03991 | 2-Deoxy-2,3-Dehydro-N-Acetyl-Neuraminic Acid                                                                         | 1.004 | 1.346 | 0.896  | 0.296  | 0.86   | 0.766 | 0.863 | 0.748 | 0.657 | 0.72  |
| DB07264 | (S)-N-(1-(3-CHLORO-4-FLUOROPHENYL)-2-HYDROXYETHYL)-4-(4-(3-CHLOROPHENYL)-1H-PYRAZOL-3-YL)-1H-PYRROLE-2-CARBOXAMIDE   | 1.004 | 1.153 | 1.027  | -0.311 | 0.681  | 0.902 | 0.922 | 0.653 | 0.309 | 0.738 |
| DB01045 | Rifampicin                                                                                                           | 1.005 | 0.631 | -0.041 | 0.132  | -0.963 | 0.819 | 0.688 | 0.311 | 0.468 | 0.13  |
| DB02258 | SR11254                                                                                                              | 1.005 | 2.519 | 1.131  | -0.123 | -0.735 | 0.816 | 0.988 | 0.794 | 0.349 | 0.171 |
| DB02741 | CD564                                                                                                                | 1.005 | 2.519 | 1.131  | -0.123 | -0.735 | 0.816 | 0.988 | 0.794 | 0.349 | 0.171 |
| DB02877 | Arotinoid acid                                                                                                       | 1.005 | 2.519 | 1.131  | -0.123 | -0.735 | 0.816 | 0.988 | 0.794 | 0.349 | 0.171 |
| DB04942 | Tamibarotene                                                                                                         | 1.005 | 2.519 | 1.131  | -0.123 | -0.735 | 0.816 | 0.988 | 0.794 | 0.349 | 0.171 |
| DB01373 | Calcium                                                                                                              | 1.006 | 0.241 | 0.739  | 2.273  | 1.337  | 0.861 | 0.521 | 0.626 | 0.994 | 0.959 |
| DB00188 | Bortezomib                                                                                                           | 1.007 | 1.345 | 0.168  | 1.79   | 0.122  | 0.874 | 0.901 | 0.45  | 0.95  | 0.479 |
| DB00677 | Isoflurophate                                                                                                        | 1.007 | 1.082 | 0.758  | 0.994  | -0.87  | 0.833 | 0.824 | 0.644 | 0.654 | 0.14  |
| DB00679 | Thioridazine                                                                                                         | 1.008 | 1.107 | 2.057  | 2.752  | 0.252  | 0.884 | 0.889 | 0.974 | 1     | 0.554 |
| DB02665 | (1R,2S)-2-Phenylcyclopropanaminium                                                                                   | 1.012 | 0.873 | 0.696  | 1.813  | 1.195  | 0.934 | 0.826 | 0.622 | 0.964 | 0.908 |
| DB01091 | Butenafine                                                                                                           | 1.013 | 1.386 | 1.019  | 0.311  | -0.578 | 0.817 | 0.906 | 0.763 | 0.365 | 0.193 |
| DB09140 | Oxygen                                                                                                               | 1.014 | 2.043 | 2.292  | 0.376  | -0.579 | 0.817 | 0.977 | 0.965 | 0.564 | 0.197 |

|         |                                                                                                |       |       |        |        |        |       |       |       |       |       |
|---------|------------------------------------------------------------------------------------------------|-------|-------|--------|--------|--------|-------|-------|-------|-------|-------|
| DB01018 | Guanfacine                                                                                     | 1.017 | 0.589 | 2.116  | 0.201  | 0.163  | 0.813 | 0.67  | 0.954 | 0.423 | 0.463 |
| DB02772 | Sucrose                                                                                        | 1.017 | 0.765 | 0.758  | 1.257  | 0.598  | 0.831 | 0.766 | 0.659 | 0.774 | 0.663 |
| DB00313 | Valproic Acid                                                                                  | 1.024 | 0.476 | 2.236  | 2.689  | 0.889  | 0.897 | 0.655 | 0.981 | 0.995 | 0.806 |
| DB03260 | 1,6-Diaminohexane                                                                              | 1.024 | 1.652 | 1.035  | 0.297  | -0.368 | 0.826 | 0.93  | 0.77  | 0.434 | 0.264 |
| DB04665 | Coumarin                                                                                       | 1.024 | 1.652 | 1.035  | 0.297  | -0.368 | 0.826 | 0.93  | 0.77  | 0.434 | 0.264 |
| DB03902 | Oxalic Acid                                                                                    | 1.028 | 0.967 | 1.287  | 1.642  | 0.877  | 0.806 | 0.786 | 0.748 | 0.953 | 0.719 |
| DB06715 | Potassium Iodide                                                                               | 1.028 | 0.967 | 1.287  | 1.642  | 0.877  | 0.806 | 0.786 | 0.748 | 0.953 | 0.719 |
| DB06794 | Lodoxamide                                                                                     | 1.028 | 1.065 | 1.287  | 0.383  | 0.957  | 0.806 | 0.821 | 0.748 | 0.524 | 0.778 |
| DB09154 | Sodium citrate                                                                                 | 1.028 | 0.967 | 1.287  | 1.642  | 0.877  | 0.806 | 0.786 | 0.748 | 0.953 | 0.719 |
| DB00862 | Vardenafil                                                                                     | 1.03  | 1.376 | 0.766  | 1.315  | -1.321 | 0.813 | 0.892 | 0.697 | 0.877 | 0.077 |
| DB00130 | L-Glutamine                                                                                    | 1.034 | 1.255 | 1.889  | -0.454 | 0.295  | 0.861 | 0.901 | 0.938 | 0.184 | 0.54  |
| DB00123 | L-Lysine                                                                                       | 1.038 | 1.288 | 1.843  | 0.505  | 0.407  | 0.856 | 0.879 | 0.924 | 0.625 | 0.566 |
| DB00358 | Mefloquine                                                                                     | 1.039 | 1.04  | 0.36   | 1.162  | 0.808  | 0.906 | 0.865 | 0.483 | 0.841 | 0.767 |
| DB03619 | Deoxycholic Acid                                                                               | 1.041 | 1.555 | 1.365  | -0.36  | -1.276 | 0.844 | 0.935 | 0.835 | 0.205 | 0.067 |
| DB00721 | Procaine                                                                                       | 1.042 | 0.628 | -0.014 | 0.57   | 0.832  | 0.825 | 0.689 | 0.398 | 0.624 | 0.733 |
| DB03854 | Pentane-1,5-Diamine                                                                            | 1.047 | 1.587 | 0.761  | 0.049  | -0.517 | 0.88  | 0.958 | 0.817 | 0.363 | 0.241 |
| DB00905 | Bimatoprost                                                                                    | 1.056 | 1.589 | -0.704 | 0.817  | -0.083 | 0.871 | 0.939 | 0.076 | 0.602 | 0.382 |
| DB00685 | Trovafloxacin                                                                                  | 1.059 | 0.809 | 0.14   | 0.622  | 1.687  | 0.92  | 0.803 | 0.446 | 0.671 | 0.966 |
| DB08922 | Perospirone                                                                                    | 1.061 | 0.324 | 2.456  | 0.652  | -0.807 | 0.825 | 0.566 | 0.977 | 0.522 | 0.154 |
| DB08700 |                                                                                                | 1.062 | 0.266 | -0.3   | 0.47   | 0.577  | 0.883 | 0.557 | 0.333 | 0.677 | 0.725 |
| DB02530 | gamma-Aminobutyric acid                                                                        | 1.063 | 0.455 | 2.765  | 1.089  | 0.518  | 0.821 | 0.635 | 0.995 | 0.789 | 0.621 |
| DB07213 | (5-{3-[5-(PIPERIDIN-1-YLMETHYL)-1H-INDOL-2-YL]-1H-INDAZOL-6-YL}-2H-1,2,3-TRIAZOL-4-YL)METHANOL | 1.066 | 1.474 | 1.264  | -0.872 | 0.529  | 0.821 | 0.906 | 0.859 | 0.127 | 0.631 |
| DB00258 | Calcium acetate                                                                                | 1.07  | 1.308 | 0.667  | 0.945  | 0.324  | 0.938 | 0.939 | 0.399 | 0.783 | 0.561 |
| DB03166 | Acetic acid                                                                                    | 1.07  | 1.308 | 0.667  | 0.945  | 0.324  | 0.938 | 0.939 | 0.399 | 0.783 | 0.561 |
| DB08927 | Amperozide                                                                                     | 1.073 | 1.425 | 0.903  | -0.175 | 0.949  | 0.84  | 0.874 | 0.806 | 0.394 | 0.846 |
| DB00692 | Phentolamine                                                                                   | 1.078 | 0.154 | 1.924  | 0.501  | 0.226  | 0.832 | 0.495 | 0.952 | 0.576 | 0.501 |
| DB02212 |                                                                                                | 1.097 | 0.053 | 0.256  | 1.105  | 0.87   | 0.843 | 0.46  | 0.284 | 0.787 | 0.758 |
| DB00199 | Erythromycin                                                                                   | 1.103 | 0.317 | 1.979  | 1.099  | 0.371  | 0.837 | 0.574 | 0.959 | 0.776 | 0.579 |
| DB01127 | Econazole                                                                                      | 1.103 | 0.926 | 0.42   | 2.061  | 0.958  | 0.898 | 0.835 | 0.628 | 0.995 | 0.833 |
| DB00190 | Carbidopa                                                                                      | 1.104 | 1.255 | -0.07  | 0.657  | 0.201  | 0.94  | 0.921 | 0.313 | 0.708 | 0.511 |
| DB01224 | Quetiapine                                                                                     | 1.104 | 0.146 | 0.979  | 2.646  | 0.324  | 0.853 | 0.501 | 0.797 | 0.998 | 0.577 |
| DB07780 | Farnesyl diphosphate                                                                           | 1.105 | 1.951 | 1.09   | 1.531  | -0.758 | 0.828 | 0.966 | 0.807 | 0.877 | 0.163 |
| DB09570 | Ixazomib                                                                                       | 1.114 | 0.903 | 2.259  | 0.83   | -1.277 | 0.844 | 0.781 | 0.993 | 0.662 | 0.072 |
| DB00617 | Paramethadione                                                                                 | 1.116 | 1.003 | 1.854  | 1.086  | 0.955  | 0.902 | 0.843 | 0.991 | 0.809 | 0.812 |
| DB00298 | Dapiprazole                                                                                    | 1.12  | 0.324 | 1.863  | 0.86   | -0.512 | 0.842 | 0.54  | 0.933 | 0.634 | 0.231 |
| DB01301 | Rolitetraacycline                                                                              | 1.121 | 1.187 | 0.401  | 0.975  | 0.605  | 0.855 | 0.856 | 0.322 | 0.788 | 0.659 |
| DB01262 | Decitabine                                                                                     | 1.122 | 1.734 | -0.907 | -0.28  | 0.777  | 0.852 | 0.938 | 0.135 | 0.287 | 0.73  |
| DB01135 | Doxacurium                                                                                     | 1.124 | 1.434 | 0.379  | 0.075  | 1.231  | 0.79  | 0.878 | 0.64  | 0.597 | 0.813 |
| DB01336 | Metocurine                                                                                     | 1.124 | 1.434 | 0.379  | 0.075  | 1.231  | 0.79  | 0.878 | 0.64  | 0.597 | 0.813 |
| DB02292 | Irosustat                                                                                      | 1.124 | 1.396 | 1.785  | 0.089  | -0.195 | 0.846 | 0.89  | 0.929 | 0.424 | 0.327 |
| DB04129 | Willardiine                                                                                    | 1.126 | 1.543 | 1.356  | 0.286  | -0.029 | 0.928 | 0.948 | 0.845 | 0.345 | 0.431 |
| DB00376 | Trihexyphenidyl                                                                                | 1.134 | 1.42  | 0.041  | 0.969  | -0.474 | 0.845 | 0.894 | 0.381 | 0.747 | 0.252 |
| DB00502 | Haloperidol                                                                                    | 1.137 | 0.072 | 1.377  | 3.482  | 0.82   | 0.902 | 0.464 | 0.9   | 1     | 0.774 |
| DB04604 | 5-iodotubercidin                                                                               | 1.142 | 1.375 | 0.914  | 0.374  | 0.779  | 0.94  | 0.941 | 0.584 | 0.579 | 0.773 |
| DB01023 | Felodipine                                                                                     | 1.143 | 1.169 | 1.611  | 2.602  | -0.606 | 0.907 | 0.886 | 0.924 | 0.998 | 0.187 |
| DB00720 | Clodronic acid                                                                                 | 1.147 | 1.298 | 1.299  | 0.438  | 0.39   | 0.854 | 0.866 | 0.889 | 0.599 | 0.594 |
| DB00177 | Valsartan                                                                                      | 1.148 | 1.282 | 1.093  | -0.097 | 1.227  | 0.845 | 0.85  | 0.825 | 0.46  | 0.84  |
| DB00275 | Olmesartan                                                                                     | 1.148 | 1.282 | 1.093  | -0.097 | 1.227  | 0.845 | 0.85  | 0.825 | 0.46  | 0.84  |
| DB00364 | Sucralfate                                                                                     | 1.148 | 0.259 | 1.956  | 1.91   | 1.907  | 0.85  | 0.528 | 0.958 | 0.988 | 0.966 |
| DB00876 | Eprosartan                                                                                     | 1.148 | 1.282 | 1.093  | -0.097 | 1.227  | 0.845 | 0.85  | 0.825 | 0.46  | 0.84  |
| DB08822 | Azilsartan medoxomil                                                                           | 1.148 | 1.282 | 1.093  | -0.097 | 1.227  | 0.845 | 0.85  | 0.825 | 0.46  | 0.84  |
| DB09279 | Fimasartan                                                                                     | 1.148 | 1.282 | 1.093  | -0.097 | 1.227  | 0.845 | 0.85  | 0.825 | 0.46  | 0.84  |
| DB01180 | Rescinnamine                                                                                   | 1.149 | 1.428 | -0.395 | 1.206  | 0.625  | 0.886 | 0.916 | 0.128 | 0.747 | 0.673 |
| DB11560 | Lesinurad                                                                                      | 1.149 | 1.237 | 1.029  | 0.425  | 1.113  | 0.81  | 0.845 | 0.748 | 0.636 | 0.771 |
| DB00575 | Clonidine                                                                                      | 1.152 | 0.775 | 2.887  | 0.892  | -0.441 | 0.848 | 0.732 | 0.994 | 0.754 | 0.228 |
| DB01007 | Tioconazole                                                                                    | 1.153 | 0.971 | 1.157  | 1.3    | 1.251  | 0.817 | 0.755 | 0.787 | 0.829 | 0.84  |
| DB00121 | Biotin                                                                                         | 1.154 | 1.665 | 0.589  | -1.006 | 1.299  | 0.933 | 0.965 | 0.564 | 0.119 | 0.906 |

|         |                                                                                                                          |       |       |        |        |        |       |       |       |       |       |
|---------|--------------------------------------------------------------------------------------------------------------------------|-------|-------|--------|--------|--------|-------|-------|-------|-------|-------|
| DB00993 | Azathioprine                                                                                                             | 1.155 | 1.096 | -2.642 | 0.048  | 1.716  | 0.86  | 0.842 | 0.005 | 0.427 | 0.948 |
| DB01267 | Paliperidone                                                                                                             | 1.155 | 0.446 | 2.048  | 2.517  | 0.373  | 0.866 | 0.622 | 0.967 | 0.995 | 0.587 |
| DB00184 | Nicotine                                                                                                                 | 1.157 | 2.195 | -0.317 | 0.667  | 0.928  | 0.844 | 0.985 | 0.277 | 0.659 | 0.773 |
| DB09235 | Efonidipine                                                                                                              | 1.157 | 1.105 | 2.01   | 0.564  | 1.01   | 0.812 | 0.798 | 0.992 | 0.614 | 0.743 |
| DB06216 | Asenapine                                                                                                                | 1.158 | 0.45  | 1.751  | 2.477  | -0.086 | 0.86  | 0.612 | 0.937 | 0.996 | 0.396 |
| DB00530 | Erlotinib                                                                                                                | 1.161 | 0.149 | -0.245 | 0.483  | 0.301  | 0.895 | 0.489 | 0.364 | 0.663 | 0.559 |
| DB08558 | 2-HYDROXYMETHYL-6-OCTYLSULFANYL-TETRAHYDRO-PYRAN-3,4,5-TRIOLE                                                            | 1.161 | 1.403 | 1.722  | -0.239 | 0.835  | 0.818 | 0.853 | 0.893 | 0.514 | 0.747 |
| DB00183 | Pentagastrin                                                                                                             | 1.162 | 1.128 | 1.13   | 0.708  | 1.063  | 0.787 | 0.799 | 0.794 | 0.736 | 0.761 |
| DB03389 | alpha-D-Xylopyranose                                                                                                     | 1.162 | 1.452 | 1.747  | 0.977  | 0.535  | 0.824 | 0.907 | 0.864 | 0.748 | 0.608 |
| DB09142 | Sincalide                                                                                                                | 1.162 | 1.128 | 1.13   | 0.708  | 1.063  | 0.787 | 0.799 | 0.794 | 0.736 | 0.761 |
| DB04419 | D-norleucine                                                                                                             | 1.164 | 0.998 | 1.692  | 1.046  | 1.421  | 0.822 | 0.763 | 0.86  | 0.772 | 0.891 |
| DB00931 | Metacycline                                                                                                              | 1.167 | 1.124 | -1.758 | 1.028  | -0.038 | 0.858 | 0.855 | 0.033 | 0.817 | 0.447 |
| DB00257 | Clotrimazole                                                                                                             | 1.172 | 1.242 | -0.702 | 1.492  | 0.099  | 0.901 | 0.937 | 0.201 | 0.97  | 0.483 |
| DB00540 | Nortriptyline                                                                                                            | 1.173 | 1.086 | 0.938  | 2.288  | -0.626 | 0.869 | 0.856 | 0.781 | 0.993 | 0.207 |
| DB08341 | 4-[[4-[[[(1R,2R)-2-(dimethylamino)cyclopentyl]amino]-5-(trifluoromethyl)pyrimidin-2-yl]amino]-N-methylbenzenesulfonamide | 1.175 | 1.624 | 0.275  | -0.845 | 1.399  | 0.862 | 0.931 | 0.232 | 0.135 | 0.877 |
| DB00476 | Duloxetine                                                                                                               | 1.179 | 0.38  | -0.033 | 1.937  | 0.906  | 0.87  | 0.612 | 0.39  | 0.986 | 0.779 |
| DB09036 | Siltuximab                                                                                                               | 1.18  | 1.114 | 1.677  | 1.282  | 1.117  | 0.893 | 0.845 | 0.978 | 0.883 | 0.857 |
| DB01261 | Sitagliptin                                                                                                              | 1.181 | 1.325 | -2.35  | 0.787  | 0.832  | 0.856 | 0.887 | 0.002 | 0.563 | 0.734 |
| DB00585 | Nizatidine                                                                                                               | 1.182 | 1.27  | 1.409  | 0.991  | 1.025  | 0.801 | 0.824 | 0.844 | 0.796 | 0.763 |
| DB00875 | Flupentixol                                                                                                              | 1.19  | 1.086 | 2.121  | 1.436  | -0.642 | 0.87  | 0.815 | 0.961 | 0.932 | 0.184 |
| DB00527 | Cinchocaine                                                                                                              | 1.191 | 0.91  | 0.911  | 1.212  | 1.218  | 0.939 | 0.816 | 0.667 | 0.846 | 0.883 |
| DB03023 | 1-Tert-Butyl-3-(4-Chloro-Phenyl)-1h-Pyrazolo[3,4-D]Pyrimidin-4-Ylamine                                                   | 1.195 | 1.353 | 0.927  | 1.297  | 0.529  | 0.955 | 0.913 | 0.552 | 0.879 | 0.655 |
| DB07384 | 1-ACETYL-2-CARBOXYPIPERIDINE                                                                                             | 1.197 | 1.647 | 0.456  | -1.201 | -0.096 | 0.863 | 0.937 | 0.275 | 0.063 | 0.387 |
| DB07394 | AUROVERTIN B                                                                                                             | 1.197 | 1.647 | 0.456  | -1.201 | -0.096 | 0.863 | 0.937 | 0.275 | 0.063 | 0.387 |
| DB08629 | N1-(2-AMINO-4-METHYLPENTYL)OCTAHYDRO-PYRROLO[1,2-A] PYRIMIDINE                                                           | 1.197 | 1.647 | 0.456  | -1.201 | -0.096 | 0.863 | 0.937 | 0.275 | 0.063 | 0.387 |
| DB00363 | Clozapine                                                                                                                | 1.198 | 0.289 | 1.507  | 2.648  | 0.332  | 0.869 | 0.575 | 0.907 | 0.999 | 0.583 |
| DB00751 | Epinastine                                                                                                               | 1.198 | 1.17  | 2.348  | 1.374  | -0.5   | 0.858 | 0.856 | 0.976 | 0.88  | 0.227 |
| DB00778 | Roxithromycin                                                                                                            | 1.212 | 1.242 | 1.227  | 1.248  | 1.051  | 0.953 | 0.955 | 0.913 | 0.872 | 0.906 |
| DB01396 | Digitoxin                                                                                                                | 1.216 | 1.391 | -0.452 | -0.129 | 1.837  | 0.953 | 0.944 | 0.245 | 0.377 | 0.976 |
| DB00045 | Lyme disease vaccine (recombinant OspA)                                                                                  | 1.231 | 0.974 | -0.306 | 2.37   | 1.005  | 0.841 | 0.791 | 0.331 | 0.949 | 0.801 |
| DB11601 | Tuberculin Purified Protein Derivative                                                                                   | 1.231 | 0.974 | -0.306 | 2.37   | 1.005  | 0.841 | 0.791 | 0.331 | 0.949 | 0.801 |
| DB01992 | Coenzyme A                                                                                                               | 1.236 | 0.467 | 0.708  | 0.341  | 0.242  | 0.876 | 0.624 | 0.619 | 0.535 | 0.516 |
| DB05424 | Canertinib                                                                                                               | 1.24  | 0.48  | 1.519  | 0.378  | 0.784  | 0.909 | 0.655 | 0.913 | 0.602 | 0.781 |
| DB00752 | Tranlycypromine                                                                                                          | 1.254 | 0.89  | 0.245  | 1.945  | 1.683  | 0.985 | 0.824 | 0.462 | 0.972 | 0.975 |
| DB05013 | Ingenol mebutate                                                                                                         | 1.255 | 0.938 | -0.234 | -0.079 | 1.353  | 0.937 | 0.848 | 0.239 | 0.398 | 0.926 |
| DB00934 | Maprotiline                                                                                                              | 1.257 | 0.285 | 1.9    | 2.089  | 0.119  | 0.881 | 0.566 | 0.961 | 0.988 | 0.47  |
| DB11582 | Thiocolchicoside                                                                                                         | 1.257 | 0.328 | 1.784  | 0.789  | 0.714  | 0.859 | 0.571 | 0.942 | 0.717 | 0.711 |
| DB01698 | Rutin                                                                                                                    | 1.261 | 2.002 | 1.767  | -0.825 | -0.27  | 0.869 | 0.985 | 0.975 | 0.152 | 0.337 |
| DB03685 | Uridine monophosphate                                                                                                    | 1.264 | 1.656 | 0.155  | 0.567  | -0.314 | 0.876 | 0.941 | 0.41  | 0.455 | 0.283 |
| DB08960 | Hexamethonium                                                                                                            | 1.264 | 0.834 | 1.64   | 1.336  | 1.278  | 0.846 | 0.707 | 0.854 | 0.844 | 0.85  |
| DB00637 | Astemizole                                                                                                               | 1.265 | 1.672 | 1.883  | 2.279  | 0.699  | 0.933 | 0.978 | 0.955 | 0.991 | 0.732 |
| DB00948 | Mezlocillin                                                                                                              | 1.268 | 1.261 | 0.14   | 0.231  | -0.505 | 0.883 | 0.884 | 0.475 | 0.516 | 0.239 |
| DB00149 | L-Leucine                                                                                                                | 1.27  | 1.402 | 1.24   | 0.873  | -0.598 | 0.872 | 0.901 | 0.832 | 0.606 | 0.203 |
| DB08175 | (2E,4E)-11-METHOXY-3,7,11-TRIMETHYLDODECA-2,4-DIENOIC ACID                                                               | 1.27  | 1.362 | 1.1    | 1.177  | -0.091 | 0.876 | 0.887 | 0.798 | 0.739 | 0.365 |
| DB00168 | Aspartame                                                                                                                | 1.273 | 1.52  | 1.231  | 1.071  | 0.878  | 0.835 | 0.882 | 0.857 | 0.801 | 0.746 |

|         |                                                                                                      |       |       |        |        |        |       |       |       |       |       |
|---------|------------------------------------------------------------------------------------------------------|-------|-------|--------|--------|--------|-------|-------|-------|-------|-------|
| DB01623 | Thiothixene                                                                                          | 1.277 | 0.336 | 2.525  | 2.482  | 0.024  | 0.896 | 0.569 | 0.991 | 0.998 | 0.456 |
| DB13154 | Parachlorophenol                                                                                     | 1.279 | 1.148 | 0.578  | 1.863  | 1.292  | 0.893 | 0.853 | 0.596 | 0.959 | 0.918 |
| DB00485 | Dicloxacillin                                                                                        | 1.28  | 1.977 | -1.071 | 0.906  | -0.791 | 0.878 | 0.98  | 0.071 | 0.717 | 0.162 |
| DB00724 | Imiquimod                                                                                            | 1.28  | 2.413 | -1.207 | 1.581  | 0.054  | 0.918 | 0.987 | 0.04  | 0.942 | 0.447 |
| DB02255 | GM6001                                                                                               | 1.281 | 0.956 | -1.09  | 1.373  | 1.068  | 0.882 | 0.793 | 0.089 | 0.888 | 0.824 |
| DB00988 | Dopamine                                                                                             | 1.282 | 0.804 | 0.704  | 1.082  | 0.136  | 0.891 | 0.78  | 0.799 | 0.856 | 0.489 |
| DB00246 | Ziprasidone                                                                                          | 1.284 | 0.479 | 0.742  | 2.351  | 0.112  | 0.899 | 0.655 | 0.704 | 0.996 | 0.469 |
| DB06292 | Dapagliflozin                                                                                        | 1.288 | 1.526 | 2.122  | 1.455  | 0.986  | 0.833 | 0.9   | 0.93  | 0.871 | 0.753 |
| DB00849 | Methylphenobarbital                                                                                  | 1.292 | 0.839 | 2.74   | 0.389  | -0.331 | 0.881 | 0.757 | 0.989 | 0.513 | 0.274 |
| DB00434 | Cyproheptadine                                                                                       | 1.293 | 0.312 | 2.299  | 2.989  | 1.071  | 0.942 | 0.576 | 0.986 | 1     | 0.854 |
| DB00780 | Phenelzine                                                                                           | 1.295 | 1.62  | -0.365 | 1.777  | 0.508  | 0.972 | 0.977 | 0.271 | 0.97  | 0.632 |
| DB00610 | Metaraminol                                                                                          | 1.296 | 1.302 | 1.348  | 1.492  | 1.11   | 0.912 | 0.892 | 0.76  | 0.921 | 0.83  |
| DB00699 | Nicergoline                                                                                          | 1.296 | 1.302 | 1.348  | 1.492  | 1.11   | 0.912 | 0.892 | 0.76  | 0.921 | 0.83  |
| DB06764 | Tetryzoline                                                                                          | 1.296 | 1.302 | 1.348  | 1.492  | 1.11   | 0.912 | 0.892 | 0.76  | 0.921 | 0.83  |
| DB00115 | Cyanocobalamin                                                                                       | 1.3   | 1.23  | 0.642  | 0.709  | 0.078  | 0.89  | 0.866 | 0.634 | 0.645 | 0.416 |
| DB09238 | Manidipine                                                                                           | 1.304 | 1.043 | 3.026  | 0.314  | -0.254 | 0.884 | 0.824 | 0.995 | 0.465 | 0.305 |
| DB01488 | Dimethyltryptamine                                                                                   | 1.305 | 0.669 | 1.177  | 0.863  | -0.313 | 0.878 | 0.695 | 0.812 | 0.611 | 0.29  |
| DB07954 | 3-isobutyl-1-methyl-7H-xanthine                                                                      | 1.305 | 1.953 | 0.359  | -0.204 | 0.364  | 0.885 | 0.967 | 0.528 | 0.257 | 0.541 |
| DB11595 | Atezolizumab                                                                                         | 1.305 | 1.031 | 1.987  | 1.972  | 0.873  | 0.844 | 0.809 | 0.91  | 0.922 | 0.781 |
| DB01941 | 6-[1-(3,5,5,8,8-Pentamethyl-5,6,7,8-Tetrahydronaphthalen-2-Yl)Cyclopropyl]Pyridine-3-Carboxylic Acid | 1.309 | 2.453 | 1.407  | 0.076  | 0.132  | 0.893 | 0.989 | 0.95  | 0.449 | 0.513 |
| DB08835 | Spaglumic Acid                                                                                       | 1.309 | 1.1   | 0.574  | 1.157  | 1.482  | 0.861 | 0.787 | 0.638 | 0.813 | 0.905 |
| DB00523 | Alitretinoin                                                                                         | 1.312 | 1.55  | 1.548  | 0.204  | -0.228 | 0.881 | 0.922 | 0.929 | 0.51  | 0.329 |
| DB00604 | Cisapride                                                                                            | 1.316 | 0.106 | 1.277  | 1.525  | 0.561  | 0.882 | 0.483 | 0.852 | 0.924 | 0.644 |
| DB01231 | Diphenidol                                                                                           | 1.317 | 1.042 | 1.403  | 1.198  | -0.618 | 0.883 | 0.811 | 0.87  | 0.826 | 0.209 |
| DB01537 | 4-Bromo-2,5-dimethoxyphenethylamine                                                                  | 1.317 | 1.271 | 1.067  | 1.454  | 1.117  | 0.887 | 0.852 | 0.754 | 0.871 | 0.784 |
| DB03793 | Benzoic Acid                                                                                         | 1.323 | 1.176 | 1.207  | 0.968  | 0.427  | 0.884 | 0.848 | 0.817 | 0.672 | 0.561 |
| DB04745 | 2-OXOQUINOLINE                                                                                       | 1.323 | 1.786 | 1.678  | 0.583  | 0.032  | 0.889 | 0.958 | 0.919 | 0.583 | 0.41  |
| DB00395 | Carisoprodol                                                                                         | 1.324 | 2.156 | -0.676 | 0.684  | 0.711  | 0.929 | 0.972 | 0.078 | 0.537 | 0.683 |
| DB01618 | Molindone                                                                                            | 1.328 | 0.506 | 3.035  | 1.38   | -0.457 | 0.896 | 0.636 | 0.996 | 0.89  | 0.26  |
| DB00833 | Cefaclor                                                                                             | 1.329 | 0.816 | 2.196  | 1.331  | 0.793  | 0.894 | 0.77  | 0.986 | 0.792 | 0.717 |
| DB04908 | Flibanserin                                                                                          | 1.332 | 0.461 | 2.457  | 0.937  | 0.052  | 0.885 | 0.634 | 0.977 | 0.657 | 0.443 |
| DB00464 | Sodium Tetradecyl Sulfate                                                                            | 1.336 | 1.693 | 3.445  | -0.848 | 0.788  | 0.864 | 0.897 | 0.98  | 0.084 | 0.832 |
| DB08490 | CTS-1027                                                                                             | 1.337 | 0.72  | -0.243 | 1.311  | 1.233  | 0.898 | 0.709 | 0.173 | 0.824 | 0.862 |
| DB06150 | Sulfadimethoxine                                                                                     | 1.339 | 1.533 | 1.681  | 0.216  | 1.095  | 0.824 | 0.857 | 0.882 | 0.715 | 0.803 |
| DB01216 | Finasteride                                                                                          | 1.352 | 1.948 | 1.759  | 0.522  | 0.59   | 0.906 | 0.932 | 0.926 | 0.696 | 0.833 |
| DB00407 | Ardeparin                                                                                            | 1.354 | 1.522 | 1.359  | 0.834  | 1.174  | 0.856 | 0.869 | 0.859 | 0.82  | 0.824 |
| DB06271 | Sulodexide                                                                                           | 1.354 | 1.522 | 1.359  | 0.834  | 1.174  | 0.856 | 0.869 | 0.859 | 0.82  | 0.824 |
| DB01429 | Aprindine                                                                                            | 1.357 | 0.861 | 0.612  | 2.433  | 0.984  | 0.974 | 0.806 | 0.58  | 0.989 | 0.829 |
| DB02098 | Adenosine-2'-5'-Diphosphate                                                                          | 1.357 | 1.952 | 2.055  | 0.189  | 0.46   | 0.851 | 0.912 | 0.925 | 0.67  | 0.807 |
| DB04825 | Prenylamine                                                                                          | 1.364 | 1.014 | 0.571  | 2.014  | 1.282  | 0.977 | 0.827 | 0.416 | 0.97  | 0.904 |
| DB08271 | N-ISOBUTYL-N-[4-METHOXYPHENYLSULFONYL]GLYCYL HYDROXAMIC ACID                                         | 1.364 | 0.948 | 1.192  | 1.981  | 1.781  | 0.887 | 0.786 | 0.813 | 0.986 | 0.962 |
| DB00228 | Enflurane                                                                                            | 1.369 | 0.497 | 0.937  | 1.059  | 0.203  | 0.903 | 0.643 | 0.837 | 0.91  | 0.477 |
| DB00656 | Trazodone                                                                                            | 1.369 | 0.578 | 2.1    | 1.848  | 0.516  | 0.909 | 0.666 | 0.971 | 0.979 | 0.628 |
| DB00043 | Omalizumab                                                                                           | 1.373 | 1.381 | 1.556  | 0.852  | 1.674  | 0.858 | 0.851 | 0.888 | 0.816 | 0.896 |
| DB00641 | Simvastatin                                                                                          | 1.376 | 1.181 | 0.462  | 1.264  | 0.169  | 0.89  | 0.85  | 0.531 | 0.778 | 0.467 |
| DB00623 | Fluphenazine                                                                                         | 1.377 | 1.528 | 0.575  | 2.652  | 1.339  | 0.96  | 0.967 | 0.754 | 0.996 | 0.924 |
| DB00772 | Malathion                                                                                            | 1.38  | 1.663 | 1.095  | 0.32   | -0.073 | 0.907 | 0.933 | 0.79  | 0.487 | 0.383 |
| DB01625 | Isopropamide                                                                                         | 1.38  | 1.448 | 0.491  | 0.861  | -0.246 | 0.91  | 0.916 | 0.521 | 0.605 | 0.333 |
| DB00599 | Thiopental                                                                                           | 1.381 | 1.017 | 2.24   | 0.557  | -0.775 | 0.906 | 0.821 | 0.978 | 0.595 | 0.16  |
| DB00114 | Pyridoxal phosphate                                                                                  | 1.387 | 0.892 | -0.06  | 1.513  | 1.604  | 0.961 | 0.809 | 0.407 | 0.957 | 0.953 |
| DB09053 | Ibrutinib                                                                                            | 1.4   | 1.038 | 1.972  | 1.28   | 0.538  | 0.954 | 0.865 | 0.953 | 0.888 | 0.68  |
| DB02999 | Quisqualate                                                                                          | 1.405 | 1.34  | 0.771  | 0.617  | 0.312  | 0.899 | 0.89  | 0.679 | 0.505 | 0.505 |
| DB00669 | Sumatriptan                                                                                          | 1.406 | 0.181 | 2.052  | 1.914  | 0.899  | 0.899 | 0.516 | 0.966 | 0.973 | 0.762 |

|         |                                                                                                          |       |       |        |        |        |       |       |       |       |       |
|---------|----------------------------------------------------------------------------------------------------------|-------|-------|--------|--------|--------|-------|-------|-------|-------|-------|
| DB00915 | Amantadine                                                                                               | 1.406 | 1.179 | 3.235  | 1.216  | 0.674  | 0.912 | 0.864 | 0.994 | 0.77  | 0.674 |
| DB00935 | Oxymetazoline                                                                                            | 1.41  | 0.606 | 1.659  | 1.538  | 0.617  | 0.903 | 0.684 | 0.922 | 0.936 | 0.654 |
| DB02329 | Carbenoxolone                                                                                            | 1.413 | 1.512 | 1.069  | 1.412  | 0.841  | 0.839 | 0.863 | 0.833 | 0.867 | 0.777 |
| DB09372 | Tannic acid                                                                                              | 1.421 | 0.917 | 1.673  | 0.908  | 0.73   | 0.981 | 0.835 | 0.926 | 0.768 | 0.751 |
| DB07636 | 5-HEPTYL-6-HYDROXY-1,3-BENZOTHAZOLE-4,7-DIONE                                                            | 1.426 | 1.675 | 2.077  | 0.934  | -0.636 | 0.908 | 0.946 | 0.946 | 0.629 | 0.19  |
| DB00602 | Ivermectin                                                                                               | 1.433 | 1.755 | 0.487  | 1.181  | -0.56  | 0.904 | 0.954 | 0.607 | 0.838 | 0.21  |
| DB01227 | Levacetylmethadol                                                                                        | 1.434 | 1.874 | 0.485  | 1.005  | 0.292  | 0.926 | 0.96  | 0.514 | 0.665 | 0.538 |
| DB06290 | Simeprevir                                                                                               | 1.437 | 1.401 | 1.747  | 1.309  | 1.372  | 0.945 | 0.939 | 0.979 | 0.858 | 0.94  |
| DB03128 | Acetylcholine                                                                                            | 1.445 | 1.595 | -0.056 | 0.808  | -0.573 | 0.914 | 0.934 | 0.359 | 0.689 | 0.215 |
| DB01016 | Glyburide                                                                                                | 1.448 | 1.446 | 1.945  | 2.319  | -0.152 | 0.906 | 0.914 | 0.959 | 0.999 | 0.358 |
| DB00370 | Mirtazapine                                                                                              | 1.452 | 0.717 | 0.677  | 1.672  | -0.33  | 0.929 | 0.72  | 0.689 | 0.956 | 0.298 |
| DB01008 | Busulfan                                                                                                 | 1.452 | 1.675 | 1.208  | 0.008  | 1.549  | 0.884 | 0.897 | 0.846 | 0.542 | 0.884 |
| DB08887 | Icosapent ethyl                                                                                          | 1.453 | 1.45  | 1.732  | 1.858  | 1.27   | 0.968 | 0.956 | 0.98  | 0.974 | 0.924 |
| DB06772 | Cabazitaxel                                                                                              | 1.456 | 2.116 | 0.35   | 0.157  | 0.439  | 0.925 | 0.969 | 0.259 | 0.46  | 0.581 |
| DB07615 | Tranilast                                                                                                | 1.458 | 1.456 | 2.068  | 1.642  | 1.357  | 0.985 | 0.976 | 0.996 | 0.953 | 0.963 |
| DB00048 | Collagenase clostridium histolyticum                                                                     | 1.462 | 1.341 | 2.922  | 1.027  | 0.885  | 0.91  | 0.881 | 0.989 | 0.669 | 0.736 |
| DB01068 | Clonazepam                                                                                               | 1.462 | 0.436 | 1.72   | 0.598  | 0.308  | 0.923 | 0.599 | 0.939 | 0.626 | 0.541 |
| DB03880 | Batimastat                                                                                               | 1.464 | 0.948 | 0.146  | 1.125  | 1.106  | 0.912 | 0.795 | 0.409 | 0.801 | 0.835 |
| DB02567 | PD173955                                                                                                 | 1.469 | 0.406 | 1.01   | 0.886  | 0.472  | 0.962 | 0.627 | 0.823 | 0.912 | 0.682 |
| DB09225 | Zotepine                                                                                                 | 1.469 | 0.733 | 1.961  | 2.518  | 0.36   | 0.918 | 0.74  | 0.968 | 1     | 0.593 |
| DB00887 | Bumetanide                                                                                               | 1.481 | 1.707 | 2.312  | 0.281  | 0.072  | 0.921 | 0.952 | 0.984 | 0.529 | 0.451 |
| DB00230 | Pregabalin                                                                                               | 1.483 | 1.407 | 0.596  | 0.895  | 0.577  | 0.931 | 0.904 | 0.581 | 0.601 | 0.647 |
| DB04849 | Cediranib                                                                                                | 1.487 | 0.608 | 0.642  | 0.909  | 0.793  | 0.952 | 0.703 | 0.695 | 0.86  | 0.796 |
| DB08382 | Gosogliptin                                                                                              | 1.488 | 1.71  | -0.48  | 0.58   | 0.582  | 0.916 | 0.955 | 0.082 | 0.458 | 0.654 |
| DB08429 | N-(((2S)-1-[(3R)-3-amino-4-(3-chlorophenyl)butanoyl]pyrrolidin-2-yl)methyl)-3-(methylsulfonyl)benzamide  | 1.488 | 1.71  | -0.48  | 0.58   | 0.582  | 0.916 | 0.955 | 0.082 | 0.458 | 0.654 |
| DB00017 | Salmon Calcitonin                                                                                        | 1.489 | 1.323 | 0.977  | 1.525  | 1.261  | 0.893 | 0.86  | 0.738 | 0.878 | 0.837 |
| DB00014 | Goserelin                                                                                                | 1.491 | 1.641 | 0.955  | 0.247  | 1.497  | 0.885 | 0.911 | 0.766 | 0.659 | 0.87  |
| DB00050 | Cetrorelix                                                                                               | 1.491 | 1.641 | 0.955  | 0.247  | 1.497  | 0.885 | 0.911 | 0.766 | 0.659 | 0.87  |
| DB00843 | Donepezil                                                                                                | 1.491 | 1.164 | -0.393 | 0.726  | -0.379 | 0.911 | 0.855 | 0.208 | 0.622 | 0.261 |
| DB06719 | Buserelin                                                                                                | 1.491 | 1.641 | 0.955  | 0.247  | 1.497  | 0.885 | 0.911 | 0.766 | 0.659 | 0.87  |
| DB01017 | Minocycline                                                                                              | 1.494 | 0.845 | 1.314  | 1.213  | 0.845  | 0.909 | 0.75  | 0.905 | 0.849 | 0.744 |
| DB00555 | Lamotrigine                                                                                              | 1.496 | 1.347 | 1.17   | 1.821  | 0.102  | 0.926 | 0.893 | 0.825 | 0.968 | 0.435 |
| DB00345 | Aminohippuric acid                                                                                       | 1.513 | 1.728 | 1.447  | 0.986  | 1.314  | 0.877 | 0.917 | 0.832 | 0.784 | 0.825 |
| DB04272 | Citric acid                                                                                              | 1.513 | 1.532 | 0.045  | 1.314  | 1.351  | 0.976 | 0.965 | 0.438 | 0.904 | 0.921 |
| DB00371 | Meprobamate                                                                                              | 1.515 | 0.758 | 1.603  | 0.44   | 0.692  | 0.936 | 0.724 | 0.919 | 0.548 | 0.687 |
| DB01083 | Orlistat                                                                                                 | 1.517 | 1.763 | -0.686 | 0.002  | 0.101  | 0.924 | 0.957 | 0.158 | 0.412 | 0.463 |
| DB00280 | Disopyramide                                                                                             | 1.519 | 2.415 | -0.849 | 0.014  | -0.046 | 0.923 | 0.991 | 0.105 | 0.36  | 0.367 |
| DB07138 | Neflamapimod                                                                                             | 1.525 | 1.497 | 1.38   | 0.121  | 1.525  | 0.979 | 0.953 | 0.873 | 0.495 | 0.941 |
| DB00343 | Diltiazem                                                                                                | 1.529 | 0.835 | 1.701  | 2.137  | 0.701  | 0.927 | 0.748 | 0.919 | 0.991 | 0.684 |
| DB00212 | Remikiren                                                                                                | 1.534 | 1.411 | 2.01   | 1.508  | 1.503  | 0.951 | 0.926 | 0.992 | 0.909 | 0.974 |
| DB09093 | Chlortetracycline                                                                                        | 1.538 | 1.867 | 0.871  | 0.518  | 0.32   | 0.921 | 0.954 | 0.685 | 0.555 | 0.544 |
| DB04812 | Benoxaprofen                                                                                             | 1.543 | 1.601 | 2.018  | 1.075  | 1.5    | 0.899 | 0.901 | 0.926 | 0.885 | 0.903 |
| DB00806 | Pentoxifylline                                                                                           | 1.552 | 1.269 | 0.204  | 0.679  | 0.53   | 0.924 | 0.867 | 0.477 | 0.551 | 0.606 |
| DB00260 | Cycloserine                                                                                              | 1.554 | 1.528 | 0.145  | 1.57   | 0.795  | 0.929 | 0.915 | 0.383 | 0.923 | 0.722 |
| DB08901 | Ponatinib                                                                                                | 1.554 | 1.132 | 0.814  | 1.536  | 0.065  | 0.981 | 0.892 | 0.691 | 0.92  | 0.465 |
| DB07193 | (2R,3R)-7-(methylsulfonyl)-3-(2,4,5-trifluorophenyl)-1,2,3,4-tetrahydropyrido[1,2-a]benzimidazol-2-amine | 1.557 | 1.583 | 1.813  | 0.82   | 1.335  | 0.858 | 0.868 | 0.904 | 0.81  | 0.845 |
| DB00302 | Tranexamic acid                                                                                          | 1.56  | 1.692 | 2.207  | -0.128 | 1.579  | 0.907 | 0.912 | 0.944 | 0.295 | 0.924 |
| DB00360 | Sapropterin                                                                                              | 1.56  | 1.336 | 2.045  | 1.273  | 0.243  | 0.93  | 0.882 | 0.96  | 0.796 | 0.514 |
| DB00402 | Eszopiclone                                                                                              | 1.561 | 0.554 | 1.994  | 0.387  | 0.642  | 0.927 | 0.659 | 0.956 | 0.538 | 0.671 |
| DB00172 | Proline                                                                                                  | 1.562 | 0.838 | 0.911  | 1.407  | 0.006  | 0.926 | 0.764 | 0.732 | 0.922 | 0.435 |
| DB04946 | lloperidone                                                                                              | 1.57  | 0.501 | 2.118  | 2.029  | 0.774  | 0.938 | 0.64  | 0.968 | 0.991 | 0.754 |



|         |                                                                               |       |       |        |        |        |       |       |       |       |       |
|---------|-------------------------------------------------------------------------------|-------|-------|--------|--------|--------|-------|-------|-------|-------|-------|
| DB01036 | Tolterodine                                                                   | 1.572 | 1.56  | 0.507  | 1.23   | -0.091 | 0.93  | 0.917 | 0.569 | 0.82  | 0.377 |
| DB00203 | Sildenafil                                                                    | 1.574 | 1.552 | -0.372 | 0.228  | 0.898  | 0.929 | 0.928 | 0.26  | 0.479 | 0.768 |
| DB00334 | Olanzapine                                                                    | 1.575 | 0.778 | 1.779  | 2.574  | 0.291  | 0.943 | 0.776 | 0.941 | 0.998 | 0.572 |
| DB00704 | Naltrexone                                                                    | 1.575 | 1.894 | -0.832 | 0.798  | 0.622  | 0.942 | 0.959 | 0.067 | 0.615 | 0.671 |
| DB00420 | Promazine                                                                     | 1.577 | 0.713 | 1.902  | 2.109  | 0.04   | 0.941 | 0.737 | 0.962 | 0.993 | 0.444 |
| DB09304 | Setiptiline                                                                   | 1.578 | 0.252 | 3.018  | 2.21   | 0.965  | 0.927 | 0.545 | 0.994 | 0.996 | 0.79  |
| DB00104 | Octreotide                                                                    | 1.579 | 1.967 | -1.079 | 0.753  | 0.547  | 0.941 | 0.96  | 0.046 | 0.608 | 0.632 |
| DB01035 | Procainamide                                                                  | 1.579 | 1.044 | 0.753  | 0.253  | 1.441  | 0.93  | 0.809 | 0.643 | 0.523 | 0.889 |
| DB00058 | Alpha-1-proteinase inhibitor                                                  | 1.582 | 1.565 | 1.665  | 0.226  | 1.632  | 0.868 | 0.876 | 0.882 | 0.691 | 0.875 |
| DB04152 | 2-Amino-3-(3-Hydroxy-7,8-Dihydro-6h-Cyclohepta[D]-4-Isoxazolyl)Propionic Acid | 1.584 | 2.216 | 1.289  | 0.52   | -0.462 | 0.955 | 0.98  | 0.802 | 0.429 | 0.247 |
| DB00231 | Temazepam                                                                     | 1.605 | 0.833 | 1.666  | 0.583  | 0.273  | 0.936 | 0.77  | 0.925 | 0.627 | 0.513 |
| DB05294 | Vandetanib                                                                    | 1.607 | 0.398 | 1.49   | 0.276  | 1.166  | 0.961 | 0.607 | 0.913 | 0.575 | 0.926 |
| DB00606 | Cyclothiazide                                                                 | 1.608 | 2.117 | 2.379  | 0.31   | -0.719 | 0.927 | 0.981 | 0.98  | 0.508 | 0.178 |
| DB01520 | Tenocyclidine                                                                 | 1.616 | 1.581 | 0.489  | 1.723  | 0.572  | 0.929 | 0.93  | 0.545 | 0.977 | 0.636 |
| DB07621 | (5-(PYRIDIN-3-YL)FURAN-2-YL)METHANAMINE                                       | 1.62  | 1.533 | 1.758  | 1.916  | 1.157  | 0.888 | 0.852 | 0.902 | 0.918 | 0.83  |
| DB03461 | 2'-Monophosphoadenosine 5'-Diphosphoribose                                    | 1.624 | 0.406 | -0.129 | 0.43   | 0.437  | 0.95  | 0.608 | 0.362 | 0.586 | 0.616 |
| DB07919 | 7-METHOXY-1-METHYL-9H-BETA-CARBOLINE                                          | 1.629 | 0.848 | 0.804  | 0.017  | 0.425  | 0.94  | 0.784 | 0.687 | 0.439 | 0.61  |
| DB01182 | Propafenone                                                                   | 1.63  | 0.853 | 1.044  | 2.523  | 0.457  | 0.939 | 0.77  | 0.81  | 0.996 | 0.631 |
| DB00845 | Clofazimine                                                                   | 1.632 | 1.727 | -1.692 | 1.572  | 1.474  | 0.937 | 0.944 | 0.018 | 0.876 | 0.902 |
| DB00508 | Triflupromazine                                                               | 1.633 | 1.73  | -0.864 | 1.017  | -0.092 | 0.94  | 0.954 | 0.073 | 0.708 | 0.355 |
| DB09119 | Eslicarbazepine acetate                                                       | 1.634 | 1.919 | 1.508  | 0.526  | 1.224  | 0.889 | 0.933 | 0.851 | 0.739 | 0.801 |
| DB05311 | Ecallantide                                                                   | 1.635 | 1.768 | 2.092  | 1.66   | 1.245  | 0.965 | 0.986 | 0.998 | 0.93  | 0.848 |
| DB06273 | Tocilizumab                                                                   | 1.636 | 1.821 | 1.529  | 1.724  | 1.181  | 0.893 | 0.923 | 0.856 | 0.889 | 0.803 |
| DB00486 | Nabilone                                                                      | 1.639 | 1.723 | 1.182  | 1.143  | 1.601  | 0.936 | 0.944 | 0.782 | 0.796 | 0.907 |
| DB00755 | Tretinoin                                                                     | 1.641 | 1.925 | 0.72   | 1.638  | 0.433  | 0.982 | 0.983 | 0.683 | 0.948 | 0.617 |
| DB01100 | Pimozide                                                                      | 1.641 | 0.308 | 2.544  | 2.111  | 0.809  | 0.971 | 0.594 | 0.995 | 0.991 | 0.793 |
| DB00907 | Cocaine                                                                       | 1.655 | 1.245 | 1.221  | 1.159  | 0.095  | 0.941 | 0.868 | 0.829 | 0.823 | 0.435 |
| DB04473 | Alpha-L-Fucose                                                                | 1.657 | 1.636 | 2.227  | 0.182  | 2.301  | 0.868 | 0.882 | 0.946 | 0.522 | 0.931 |
| DB04639 | Biphenylalanine                                                               | 1.657 | 1.636 | 2.227  | 0.182  | 2.301  | 0.868 | 0.882 | 0.946 | 0.522 | 0.931 |
| DB01139 | Cefapirin                                                                     | 1.663 | 1.012 | 0.402  | 1.309  | 1.452  | 0.947 | 0.83  | 0.57  | 0.887 | 0.921 |
| DB00456 | Cefalotin                                                                     | 1.664 | 1.171 | 0.505  | 0.827  | 1.094  | 0.935 | 0.844 | 0.549 | 0.72  | 0.819 |
| DB00318 | Codeine                                                                       | 1.666 | 1.878 | -0.27  | 0.891  | 0.434  | 0.956 | 0.973 | 0.105 | 0.605 | 0.607 |
| DB00327 | Hydromorphone                                                                 | 1.666 | 1.878 | -0.27  | 0.891  | 0.434  | 0.956 | 0.973 | 0.105 | 0.605 | 0.607 |
| DB00611 | Butorphanol                                                                   | 1.666 | 1.878 | -0.27  | 0.891  | 0.434  | 0.956 | 0.973 | 0.105 | 0.605 | 0.607 |
| DB00622 | Nicardipine                                                                   | 1.666 | 0.752 | 1.231  | 2.381  | 0.422  | 0.971 | 0.773 | 0.854 | 0.998 | 0.6   |
| DB00844 | Nalbuphine                                                                    | 1.666 | 1.878 | -0.27  | 0.891  | 0.434  | 0.956 | 0.973 | 0.105 | 0.605 | 0.607 |
| DB00854 | Levorphanol                                                                   | 1.666 | 1.878 | -0.27  | 0.891  | 0.434  | 0.956 | 0.973 | 0.105 | 0.605 | 0.607 |
| DB00899 | Remifentanil                                                                  | 1.666 | 1.878 | -0.27  | 0.891  | 0.434  | 0.956 | 0.973 | 0.105 | 0.605 | 0.607 |
| DB00956 | Hydrocodone                                                                   | 1.666 | 1.878 | -0.27  | 0.891  | 0.434  | 0.956 | 0.973 | 0.105 | 0.605 | 0.607 |
| DB01184 | Domperidone                                                                   | 1.666 | 0.645 | 2.932  | 2.496  | 1.26   | 0.989 | 0.73  | 0.994 | 0.995 | 0.887 |
| DB01192 | Oxymorphone                                                                   | 1.666 | 1.878 | -0.27  | 0.891  | 0.434  | 0.956 | 0.973 | 0.105 | 0.605 | 0.607 |
| DB01439 | 3-Methylthiofentanyl                                                          | 1.666 | 1.878 | -0.27  | 0.891  | 0.434  | 0.956 | 0.973 | 0.105 | 0.605 | 0.607 |
| DB01462 | Etonitazene                                                                   | 1.666 | 1.878 | -0.27  | 0.891  | 0.434  | 0.956 | 0.973 | 0.105 | 0.605 | 0.607 |
| DB01535 | Carfentanil                                                                   | 1.666 | 1.878 | -0.27  | 0.891  | 0.434  | 0.956 | 0.973 | 0.105 | 0.605 | 0.607 |
| DB01571 | 3-Methylfentanyl                                                              | 1.666 | 1.878 | -0.27  | 0.891  | 0.434  | 0.956 | 0.973 | 0.105 | 0.605 | 0.607 |
| DB05302 |                                                                               | 1.666 | 1.878 | -0.27  | 0.891  | 0.434  | 0.956 | 0.973 | 0.105 | 0.605 | 0.607 |
| DB05508 |                                                                               | 1.666 | 1.878 | -0.27  | 0.891  | 0.434  | 0.956 | 0.973 | 0.105 | 0.605 | 0.607 |
| DB09272 | Eluxadoline                                                                   | 1.666 | 1.878 | -0.27  | 0.891  | 0.434  | 0.956 | 0.973 | 0.105 | 0.605 | 0.607 |
| DB09396 |                                                                               | 1.666 | 1.878 | -0.27  | 0.891  | 0.434  | 0.956 | 0.973 | 0.105 | 0.605 | 0.607 |
| DB00799 | Tazarotene                                                                    | 1.668 | 2.823 | 1.198  | 0.207  | -0.2   | 0.938 | 0.997 | 0.844 | 0.5   | 0.332 |
| DB06589 | Pazopanib                                                                     | 1.671 | 0.011 | 0.529  | 0.755  | 1.188  | 0.969 | 0.423 | 0.653 | 0.818 | 0.921 |
| DB04799 | 6-Hydroxy-5-undecyl-4,7-benzothiazole-dione                                   | 1.672 | 1.533 | 0.766  | -0.068 | 0.158  | 0.939 | 0.918 | 0.634 | 0.36  | 0.462 |

|         |                                                                                   |       |       |        |        |        |       |       |       |       |       |
|---------|-----------------------------------------------------------------------------------|-------|-------|--------|--------|--------|-------|-------|-------|-------|-------|
| DB07401 | METHYL (2Z)-2-(2-{{6-(2-CYANOPHENOXY)PYRIMIDIN-4-YL}OXY}PHENYL)-3-METHOXYACRYLATE | 1.672 | 1.533 | 0.766  | -0.068 | 0.158  | 0.939 | 0.918 | 0.634 | 0.36  | 0.462 |
| DB07763 | (5S)-3-ANILINO-5-(2,4-DIFLUOROPHENYL)-5-METHYL-1,3-OXAZOLIDINE-2,4-DIONE          | 1.672 | 1.533 | 0.766  | -0.068 | 0.158  | 0.939 | 0.918 | 0.634 | 0.36  | 0.462 |
| DB07778 | FAMOXADONE                                                                        | 1.672 | 1.533 | 0.766  | -0.068 | 0.158  | 0.939 | 0.918 | 0.634 | 0.36  | 0.462 |
| DB08330 | METHYL (2Z)-3-METHOXY-2-{2-[(E)-2-PHENYLVINYL]PHENYL}ACRYLATE                     | 1.672 | 1.533 | 0.766  | -0.068 | 0.158  | 0.939 | 0.918 | 0.634 | 0.36  | 0.462 |
| DB08453 | 2-NONYL-4-HYDROXYQUINOLINE N-OXIDE                                                | 1.672 | 1.533 | 0.766  | -0.068 | 0.158  | 0.939 | 0.918 | 0.634 | 0.36  | 0.462 |
| DB08690 | UBIQUINONE-2                                                                      | 1.672 | 1.533 | 0.766  | -0.068 | 0.158  | 0.939 | 0.918 | 0.634 | 0.36  | 0.462 |
| DB09194 | Etoperidone                                                                       | 1.674 | 1.692 | 2.711  | 0.868  | 0.254  | 0.95  | 0.936 | 0.99  | 0.609 | 0.506 |
| DB00200 | Hydroxocobalamin                                                                  | 1.681 | 1.804 | 0.791  | 0.666  | -0.036 | 0.954 | 0.954 | 0.691 | 0.622 | 0.371 |
| DB06335 | Saxagliptin                                                                       | 1.682 | 1.734 | -0.445 | 0.791  | 0.813  | 0.943 | 0.954 | 0.082 | 0.56  | 0.735 |
| DB00116 | Tetrahydrofolic acid                                                              | 1.685 | 1.218 | 0.907  | 1.415  | 1.293  | 0.993 | 0.937 | 0.717 | 0.897 | 0.901 |
| DB04141 | 2-Hexyloxy-6-Hydroxymethyl-Tetrahydro-Pyran-3,4,5-Triol                           | 1.686 | 1.286 | -0.351 | 0.531  | 0.233  | 0.943 | 0.883 | 0.223 | 0.597 | 0.507 |
| DB00800 | Fenoldopam                                                                        | 1.698 | 1.196 | 1.316  | 1.92   | 0.981  | 0.944 | 0.85  | 0.936 | 0.993 | 0.796 |
| DB02818 | Iodo-Willardiine                                                                  | 1.703 | 2.152 | 1.116  | 0.352  | 0.195  | 0.965 | 0.975 | 0.782 | 0.362 | 0.498 |
| DB02966 | Fluoro-Willardiine                                                                | 1.703 | 2.152 | 1.116  | 0.352  | 0.195  | 0.965 | 0.975 | 0.782 | 0.362 | 0.498 |
| DB04000 | Bromo-Willardiine                                                                 | 1.703 | 2.152 | 1.116  | 0.352  | 0.195  | 0.965 | 0.975 | 0.782 | 0.362 | 0.498 |
| DB02621 | Latrunculin A                                                                     | 1.709 | 1.209 | 1.196  | 0.489  | 0.071  | 0.951 | 0.872 | 0.835 | 0.564 | 0.439 |
| DB01189 | Desflurane                                                                        | 1.713 | 1.039 | 1.571  | 1.083  | 0.116  | 0.952 | 0.879 | 0.946 | 0.902 | 0.473 |
| DB01236 | Sevoflurane                                                                       | 1.713 | 1.039 | 1.571  | 1.083  | 0.116  | 0.952 | 0.879 | 0.946 | 0.902 | 0.473 |
| DB01071 | Mequitazine                                                                       | 1.716 | 1.632 | 0.17   | 0.929  | 0.116  | 0.95  | 0.941 | 0.443 | 0.706 | 0.441 |
| DB00404 | Alprazolam                                                                        | 1.722 | 0.698 | 1.083  | 0.885  | 0.918  | 0.951 | 0.724 | 0.815 | 0.762 | 0.762 |
| DB00788 | Naproxen                                                                          | 1.725 | 1.689 | -0.15  | 0.018  | 1.28   | 0.949 | 0.943 | 0.23  | 0.409 | 0.862 |
| DB00433 | Prochlorperazine                                                                  | 1.735 | 1.299 | 1.659  | 1.304  | 1.216  | 0.991 | 0.898 | 0.936 | 0.901 | 0.898 |
| DB00786 | Marimastat                                                                        | 1.74  | 0.761 | 2.11   | 1.336  | 1.72   | 0.958 | 0.754 | 0.973 | 0.9   | 0.946 |
| DB01351 | Amobarbital                                                                       | 1.744 | 1.472 | 2.469  | 0.178  | 0.088  | 0.957 | 0.911 | 0.98  | 0.412 | 0.426 |
| DB01352 | Aprobarbital                                                                      | 1.744 | 1.472 | 2.469  | 0.178  | 0.088  | 0.957 | 0.911 | 0.98  | 0.412 | 0.426 |
| DB01353 | Butobarbital                                                                      | 1.744 | 1.472 | 2.469  | 0.178  | 0.088  | 0.957 | 0.911 | 0.98  | 0.412 | 0.426 |
| DB01354 | Heptobarbital                                                                     | 1.744 | 1.472 | 2.469  | 0.178  | 0.088  | 0.957 | 0.911 | 0.98  | 0.412 | 0.426 |
| DB01355 | Hexobarbital                                                                      | 1.744 | 1.472 | 2.469  | 0.178  | 0.088  | 0.957 | 0.911 | 0.98  | 0.412 | 0.426 |
| DB01483 | Barbital                                                                          | 1.744 | 1.472 | 2.469  | 0.178  | 0.088  | 0.957 | 0.911 | 0.98  | 0.412 | 0.426 |
| DB01496 | Barbituric acid derivative                                                        | 1.744 | 1.472 | 2.469  | 0.178  | 0.088  | 0.957 | 0.911 | 0.98  | 0.412 | 0.426 |
| DB06695 | Dabigatran etexilate                                                              | 1.744 | 1.785 | 1.952  | -0.15  | 0.223  | 0.939 | 0.957 | 0.95  | 0.365 | 0.479 |
| DB00189 | Ethchlorvynol                                                                     | 1.753 | 0.973 | 2.139  | 0.326  | 0.483  | 0.951 | 0.79  | 0.971 | 0.503 | 0.6   |
| DB01107 | Methypylon                                                                        | 1.753 | 0.973 | 2.139  | 0.326  | 0.483  | 0.951 | 0.79  | 0.971 | 0.503 | 0.6   |
| DB01437 | Glutethimide                                                                      | 1.753 | 0.973 | 2.139  | 0.326  | 0.483  | 0.951 | 0.79  | 0.971 | 0.503 | 0.6   |
| DB01907 |                                                                                   | 1.755 | 0.154 | -0.986 | 0.821  | 1.244  | 0.96  | 0.523 | 0.133 | 0.807 | 0.902 |
| DB00836 | Loperamide                                                                        | 1.759 | 1.658 | 0.104  | 3.282  | 0.667  | 0.993 | 0.955 | 0.452 | 1     | 0.716 |
| DB07376 | 5-(DIMETHYLAMINO)-1-NAPHTHALENESULFONIC ACID(DANSYL ACID)                         | 1.76  | 2.266 | 1.661  | 0.539  | 0.729  | 0.927 | 0.947 | 0.912 | 0.683 | 0.871 |
| DB06800 | Methylnaltrexone                                                                  | 1.767 | 1.931 | -0.603 | 0.83   | 0.524  | 0.955 | 0.966 | 0.104 | 0.616 | 0.641 |
| DB01205 | Flumazenil                                                                        | 1.778 | 1.038 | 1.707  | -0.173 | 0.901  | 0.951 | 0.823 | 0.932 | 0.316 | 0.778 |
| DB00186 | Lorazepam                                                                         | 1.783 | 0.757 | 1.633  | 0.477  | 0.738  | 0.953 | 0.733 | 0.923 | 0.594 | 0.708 |
| DB00628 | Clorazepic acid                                                                   | 1.783 | 0.757 | 1.633  | 0.477  | 0.738  | 0.953 | 0.733 | 0.923 | 0.594 | 0.708 |
| DB02556 | D-Phenylalanine                                                                   | 1.787 | 1.517 | 1.996  | 2.165  | 2.023  | 0.901 | 0.859 | 0.919 | 0.934 | 0.932 |
| DB00126 | Ascorbic acid                                                                     | 1.793 | 1.36  | 1.238  | -0.085 | -0.307 | 0.962 | 0.898 | 0.845 | 0.377 | 0.31  |
| DB05229 | Beraprost                                                                         | 1.796 | 1.891 | 0.557  | 0.923  | 0.7    | 0.965 | 0.957 | 0.529 | 0.649 | 0.688 |
| DB00695 | Furosemide                                                                        | 1.798 | 1.624 | 1.768  | 0.145  | 0.197  | 0.966 | 0.942 | 0.932 | 0.419 | 0.476 |
| DB04855 | Dronedarone                                                                       | 1.798 | 0.543 | 2.022  | 0.771  | 0.886  | 0.959 | 0.664 | 0.982 | 0.746 | 0.772 |
| DB00761 | Potassium chloride                                                                | 1.802 | 2.44  | 1.664  | 0.958  | 0.167  | 0.957 | 0.992 | 0.917 | 0.726 | 0.463 |
| DB00141 | N-Acetylglucosamine                                                               | 1.804 | 1.986 | 0.573  | 0.91   | -0.3   | 0.95  | 0.964 | 0.587 | 0.691 | 0.295 |
| DB01244 | Bepidil                                                                           | 1.806 | 0.489 | 1.554  | 2.592  | 2.363  | 0.98  | 0.651 | 0.922 | 0.993 | 0.998 |

|         |                                                                                                             |       |       |        |        |        |       |       |       |       |       |
|---------|-------------------------------------------------------------------------------------------------------------|-------|-------|--------|--------|--------|-------|-------|-------|-------|-------|
| DB04532 | Indole                                                                                                      | 1.819 | 1.712 | 1.98   | 2.884  | 1.596  | 0.963 | 0.952 | 0.901 | 0.994 | 0.924 |
| DB00652 | Pentazocine                                                                                                 | 1.824 | 1.931 | -0.217 | 1.254  | 0.681  | 0.96  | 0.97  | 0.136 | 0.766 | 0.658 |
| DB01079 | Tegaserod                                                                                                   | 1.831 | 0.615 | -0.018 | 2.159  | 0.935  | 0.953 | 0.673 | 0.318 | 0.983 | 0.785 |
| DB08190 | N-[2-(2-iodo-5-methoxy-1H-indol-3-yl)ethyl]acetamide                                                        | 1.833 | 1.758 | 1.084  | 1.467  | 0.28   | 0.966 | 0.947 | 0.792 | 0.832 | 0.521 |
| DB06372 | Riloncept                                                                                                   | 1.834 | 2.201 | 1.702  | -0.279 | 1.596  | 0.926 | 0.942 | 0.91  | 0.184 | 0.913 |
| DB07841 | Geranylgeranyl diphosphate                                                                                  | 1.837 | 3.047 | 0.803  | 1.336  | -1.214 | 0.954 | 1     | 0.678 | 0.805 | 0.095 |
| DB00546 | Adinazolam                                                                                                  | 1.844 | 1.042 | 1.54   | 0.25   | 0.427  | 0.957 | 0.817 | 0.893 | 0.469 | 0.572 |
| DB00729 |                                                                                                             | 1.845 | 1.841 | 2.495  | 0.713  | 1.309  | 0.912 | 0.91  | 0.943 | 0.834 | 0.886 |
| DB09357 | Dexpanthenol                                                                                                | 1.845 | 1.841 | 2.495  | 0.713  | 1.309  | 0.912 | 0.91  | 0.943 | 0.834 | 0.886 |
| DB00926 | Etretinate                                                                                                  | 1.846 | 2.927 | 1.339  | -0.34  | 0.753  | 0.954 | 0.995 | 0.912 | 0.283 | 0.708 |
| DB01577 | Metamfetamine                                                                                               | 1.847 | 1.473 | 2.06   | 0.65   | 0.214  | 0.957 | 0.925 | 0.954 | 0.59  | 0.476 |
| DB01206 | Lomustine                                                                                                   | 1.854 | 1.603 | 1.832  | 1.735  | 1.705  | 0.977 | 0.954 | 0.877 | 0.919 | 0.955 |
| DB06691 | Mepyramine                                                                                                  | 1.867 | 1.284 | 0.606  | 1.305  | 0.315  | 0.96  | 0.881 | 0.618 | 0.889 | 0.527 |
| DB00829 | Diazepam                                                                                                    | 1.873 | 1.112 | 1.461  | 0.61   | 0.557  | 0.97  | 0.85  | 0.897 | 0.637 | 0.615 |
| DB02687 |                                                                                                             | 1.874 | 1.452 | 0.503  | -0.394 | 1.097  | 0.97  | 0.949 | 0.756 | 0.273 | 0.908 |
| DB00292 | Etomidate                                                                                                   | 1.881 | 1.822 | 3.111  | 1.188  | 0.364  | 0.971 | 0.961 | 0.996 | 0.868 | 0.552 |
| DB00392 | Profenamine                                                                                                 | 1.883 | 2.098 | -1.695 | 1.208  | 1.018  | 0.978 | 0.986 | 0.036 | 0.83  | 0.787 |
| DB01425 | Alizapride                                                                                                  | 1.885 | 1.787 | 4.283  | 0.404  | 1.629  | 0.907 | 0.905 | 0.995 | 0.706 | 0.9   |
| DB04519 | Caprylic acid                                                                                               | 1.889 | 1.903 | 1.187  | 1.529  | 1.657  | 0.917 | 0.924 | 0.812 | 0.877 | 0.886 |
| DB09118 | Stiripentol                                                                                                 | 1.894 | 1.155 | 2.292  | 0.204  | -0.446 | 0.971 | 0.847 | 0.981 | 0.495 | 0.246 |
| DB00805 | Minaprine                                                                                                   | 1.895 | 1.287 | 0.438  | 0.922  | 0.145  | 0.97  | 0.88  | 0.561 | 0.669 | 0.472 |
| DB01452 | Diamorphine                                                                                                 | 1.897 | 2.441 | 0.433  | 0.956  | 0.606  | 0.977 | 0.99  | 0.498 | 0.641 | 0.661 |
| DB00001 | Lepirudin                                                                                                   | 1.898 | 1.781 | 1.987  | 1.03   | 1.888  | 0.924 | 0.91  | 0.91  | 0.829 | 0.916 |
| DB00006 | Bivalirudin                                                                                                 | 1.898 | 1.781 | 1.987  | 1.03   | 1.888  | 0.924 | 0.91  | 0.91  | 0.829 | 0.916 |
| DB01123 | Proflavine                                                                                                  | 1.898 | 1.781 | 1.987  | 1.03   | 1.888  | 0.924 | 0.91  | 0.91  | 0.829 | 0.916 |
| DB11095 | Desirudin                                                                                                   | 1.898 | 1.781 | 1.987  | 1.03   | 1.888  | 0.924 | 0.91  | 0.91  | 0.829 | 0.916 |
| DB01049 | Ergoloid mesylate                                                                                           | 1.899 | 0.509 | 2.768  | 1.9    | 1.089  | 0.978 | 0.662 | 0.995 | 0.977 | 0.861 |
| DB00767 | Benzquinamide                                                                                               | 1.9   | 1.69  | 2.839  | 1.266  | -0.308 | 0.969 | 0.942 | 0.993 | 0.865 | 0.296 |
| DB00835 | Brompheniramine                                                                                             | 1.907 | 1.883 | 0.305  | 1.125  | 0.054  | 0.96  | 0.967 | 0.476 | 0.799 | 0.421 |
| DB08801 | Dimetindene                                                                                                 | 1.907 | 1.883 | 0.305  | 1.125  | 0.054  | 0.96  | 0.967 | 0.476 | 0.799 | 0.421 |
| DB00753 | Isoflurane                                                                                                  | 1.908 | 1.026 | 0.842  | 1.966  | 0.928  | 0.993 | 0.868 | 0.824 | 0.985 | 0.823 |
| DB00726 | Trimipramine                                                                                                | 1.921 | 1.614 | 0.844  | 2.23   | -0.189 | 0.971 | 0.946 | 0.733 | 0.992 | 0.34  |
| DB00210 | Adapalene                                                                                                   | 1.926 | 2.865 | 1.478  | -0.035 | 0.687  | 0.965 | 0.999 | 0.922 | 0.395 | 0.693 |
| DB01062 | Oxybutynin                                                                                                  | 1.928 | 1.88  | 0.838  | 1.468  | 0.104  | 0.969 | 0.969 | 0.716 | 0.929 | 0.456 |
| DB09167 | Dosulepin                                                                                                   | 1.93  | 1.076 | 1.452  | 1.198  | -0.268 | 0.972 | 0.828 | 0.887 | 0.843 | 0.326 |
| DB00920 | Ketotifen                                                                                                   | 1.932 | 1.023 | 0.844  | 1.126  | 0.648  | 0.977 | 0.833 | 0.751 | 0.839 | 0.69  |
| DB00145 | Glycine                                                                                                     | 1.935 | 0.959 | -0.056 | 2.024  | 1.654  | 0.989 | 0.864 | 0.399 | 0.989 | 0.97  |
| DB00897 | Triazolam                                                                                                   | 1.942 | 0.804 | 1.544  | 0.562  | 0.874  | 0.961 | 0.759 | 0.909 | 0.625 | 0.773 |
| DB01591 | Solifenacin                                                                                                 | 1.947 | 1.879 | 0.495  | 1.262  | 0.088  | 0.962 | 0.964 | 0.547 | 0.837 | 0.45  |
| DB06148 | Mianserin                                                                                                   | 1.947 | 0.779 | 2.529  | 2.781  | 0.954  | 0.979 | 0.757 | 0.994 | 1     | 0.802 |
| DB04275 | N-acetylserotonin                                                                                           | 1.952 | 1.704 | 1.041  | 1.46   | 0.246  | 0.967 | 0.937 | 0.769 | 0.829 | 0.517 |
| DB01232 | Saquinavir                                                                                                  | 1.958 | 1.232 | -0.457 | 0.82   | 1.918  | 0.973 | 0.866 | 0.198 | 0.741 | 0.974 |
| DB00503 | Ritonavir                                                                                                   | 1.96  | 1.819 | 0.213  | 1.438  | 0.027  | 0.962 | 0.958 | 0.478 | 0.914 | 0.421 |
| DB00381 | Amlodipine                                                                                                  | 1.967 | 1.16  | 3.159  | 1.6    | 0.232  | 0.983 | 0.906 | 0.998 | 0.985 | 0.504 |
| DB00497 | Oxycodone                                                                                                   | 1.97  | 2.263 | -0.546 | 1.049  | 0.789  | 0.959 | 0.984 | 0.096 | 0.685 | 0.712 |
| DB00039 | Palifermin                                                                                                  | 1.974 | 1.501 | 1.332  | 1.141  | 0.199  | 0.97  | 0.925 | 0.923 | 0.796 | 0.485 |
| DB00813 | Fentanyl                                                                                                    | 1.985 | 2.191 | -0.205 | 1.157  | 0.651  | 0.966 | 0.982 | 0.124 | 0.725 | 0.664 |
| DB01176 | Cyclizine                                                                                                   | 1.992 | 1.48  | -0.011 | 1.447  | 0.092  | 0.97  | 0.926 | 0.391 | 0.904 | 0.446 |
| DB08039 | (3Z)-N,N-DIMETHYL-2-OXO-3-(4,5,6,7-TETRAHYDRO-1H-INDOL-2-YLMETHYLIDENE)-2,3-DIHYDRO-1H-INDOLE-5-SULFONAMIDE | 2.001 | 1.58  | 0.192  | 2.345  | 0.966  | 1     | 0.956 | 0.492 | 0.984 | 0.812 |
| DB01873 | Epothilone D                                                                                                | 2.007 | 1.656 | 0.81   | 2.126  | 0.599  | 0.99  | 0.977 | 0.721 | 0.974 | 0.717 |
| DB03010 | Patupilone                                                                                                  | 2.007 | 1.656 | 0.81   | 2.126  | 0.599  | 0.99  | 0.977 | 0.721 | 0.974 | 0.717 |
| DB01151 | Desipramine                                                                                                 | 2.013 | 1.475 | 0.695  | 2.154  | -0.171 | 0.976 | 0.935 | 0.692 | 0.993 | 0.352 |
| DB03147 | Flavin adenine dinucleotide                                                                                 | 2.015 | 1.375 | 0.691  | 0.454  | 0.645  | 0.975 | 0.917 | 0.689 | 0.641 | 0.695 |
| DB08222 | METHOXYUNDECYLPHOSPHINIC ACID                                                                               | 2.028 | 2.173 | 3.303  | 2.252  | 1.727  | 0.986 | 0.989 | 1     | 0.968 | 0.92  |
| DB00129 | Ornithine                                                                                                   | 2.029 | 1.404 | 1.379  | 0.538  | 0.197  | 0.975 | 0.906 | 0.857 | 0.611 | 0.472 |

|         |                                     |       |       |        |       |        |       |       |       |       |       |
|---------|-------------------------------------|-------|-------|--------|-------|--------|-------|-------|-------|-------|-------|
| DB00804 | Dicyclomine                         | 2.03  | 1.693 | 1.103  | 1.667 | -0.075 | 0.971 | 0.941 | 0.793 | 0.949 | 0.391 |
| DB03773 | alpha-D-quinovopyranose             | 2.035 | 1.819 | 2.355  | 2.169 | 2.01   | 0.986 | 0.955 | 0.997 | 0.966 | 0.977 |
| DB00416 | Metocurine Iodide                   | 2.036 | 2.198 | 2.176  | 2.185 | 1.811  | 0.971 | 0.983 | 0.979 | 0.974 | 0.961 |
| DB00565 | Cisatracurium                       | 2.036 | 2.198 | 2.176  | 2.185 | 1.811  | 0.971 | 0.983 | 0.979 | 0.974 | 0.961 |
| DB00732 | Atracurium besylate                 | 2.036 | 2.198 | 2.176  | 2.185 | 1.811  | 0.971 | 0.983 | 0.979 | 0.974 | 0.961 |
| DB00992 | Methyl aminolevulinate              | 2.037 | 2.231 | 0.938  | 2.505 | 2.033  | 0.968 | 0.98  | 0.749 | 0.969 | 0.968 |
| DB01548 | Diprenorphine                       | 2.04  | 2.15  | -0.241 | 1.097 | 0.814  | 0.973 | 0.971 | 0.117 | 0.677 | 0.729 |
| DB01142 | Doxepin                             | 2.042 | 1.042 | 2.235  | 2.329 | 0.49   | 0.982 | 0.835 | 0.977 | 0.998 | 0.639 |
| DB11311 | Prothrombin                         | 2.046 | 1.881 | 1.441  | 0.907 | 0.675  | 0.976 | 0.97  | 0.869 | 0.616 | 0.679 |
| DB00683 | Midazolam                           | 2.048 | 1.065 | 1.432  | 0.786 | 0.862  | 0.979 | 0.842 | 0.888 | 0.719 | 0.747 |
| DB01160 | Dinoprost tromethamine              | 2.049 | 1.371 | 0.204  | 1.18  | 1.119  | 0.979 | 0.902 | 0.462 | 0.821 | 0.824 |
| DB00122 | Choline                             | 2.056 | 1.379 | 1.187  | 0.927 | 0.976  | 0.969 | 0.901 | 0.819 | 0.682 | 0.775 |
| DB00550 | Propylthiouracil                    | 2.08  | 2.181 | 2.453  | 2.461 | 1.519  | 0.98  | 0.991 | 0.998 | 0.981 | 0.886 |
| DB00408 | Loxapine                            | 2.094 | 0.895 | 2.699  | 2.683 | 0.89   | 0.985 | 0.782 | 0.994 | 0.999 | 0.781 |
| DB09536 | Titanium dioxide                    | 2.102 | 2.281 | 2.868  | 1.882 | 1.943  | 0.974 | 0.985 | 0.99  | 0.962 | 0.965 |
| DB00100 | Coagulation Factor IX (Recombinant) | 2.12  | 1.64  | 1.392  | 1.294 | 1.017  | 0.979 | 0.924 | 0.868 | 0.786 | 0.79  |
| DB13152 | Coagulation Factor IX Human         | 2.12  | 1.64  | 1.392  | 1.294 | 1.017  | 0.979 | 0.924 | 0.868 | 0.786 | 0.79  |
| DB00349 | Clobazam                            | 2.121 | 1.181 | 1.786  | 0.378 | 0.606  | 0.977 | 0.871 | 0.946 | 0.538 | 0.663 |
| DB00801 | Halazepam                           | 2.121 | 1.181 | 1.786  | 0.378 | 0.606  | 0.977 | 0.871 | 0.946 | 0.538 | 0.663 |
| DB01215 | Estazolam                           | 2.121 | 1.181 | 1.786  | 0.378 | 0.606  | 0.977 | 0.871 | 0.946 | 0.538 | 0.663 |
| DB01558 | Bromazepam                          | 2.121 | 1.181 | 1.786  | 0.378 | 0.606  | 0.977 | 0.871 | 0.946 | 0.538 | 0.663 |
| DB01588 | Prazepam                            | 2.121 | 1.181 | 1.786  | 0.378 | 0.606  | 0.977 | 0.871 | 0.946 | 0.538 | 0.663 |
| DB01589 | Quazepam                            | 2.121 | 1.181 | 1.786  | 0.378 | 0.606  | 0.977 | 0.871 | 0.946 | 0.538 | 0.663 |
| DB00661 | Verapamil                           | 2.123 | 0.847 | 3.069  | 1.981 | 0.983  | 0.992 | 0.795 | 0.999 | 0.995 | 0.827 |
| DB01254 | Dasatinib                           | 2.13  | 0.603 | 1.087  | 1.097 | 0.272  | 0.995 | 0.716 | 0.831 | 0.932 | 0.554 |
| DB00289 | Atomoxetine                         | 2.154 | 1.148 | 0.124  | 2.869 | 1.435  | 0.987 | 0.861 | 0.454 | 0.999 | 0.924 |
| DB00587 | Cinalukast                          | 2.156 | 2.027 | 1.554  | 2.346 | 1.963  | 0.979 | 0.98  | 0.914 | 0.98  | 0.97  |
| DB06274 | Alvimopan                           | 2.169 | 2.322 | -0.268 | 1.009 | 0.782  | 0.978 | 0.981 | 0.117 | 0.652 | 0.716 |
| DB09146 | Iron saccharate                     | 2.178 | 2.031 | 2.329  | 1.481 | 0.983  | 0.948 | 0.948 | 0.959 | 0.928 | 0.887 |
| DB00295 | Morphine                            | 2.181 | 2.604 | 1.232  | 2.294 | 0.99   | 0.984 | 0.992 | 0.824 | 0.993 | 0.791 |
| DB00690 | Flurazepam                          | 2.19  | 1.251 | 2.097  | 0.439 | 0.689  | 0.983 | 0.88  | 0.963 | 0.576 | 0.684 |
| DB00921 | Buprenorphine                       | 2.204 | 2.627 | 0.378  | 1.55  | 0.839  | 0.984 | 0.99  | 0.484 | 0.94  | 0.73  |
| DB09089 | Trimebutine                         | 2.209 | 1.816 | 1.198  | 0.544 | 0.948  | 0.987 | 0.968 | 0.846 | 0.617 | 0.775 |
| DB00475 | Chlordiazepoxide                    | 2.212 | 1.271 | 1.825  | 0.377 | 0.638  | 0.983 | 0.878 | 0.949 | 0.532 | 0.678 |
| DB00917 | Dinoprostone                        | 2.212 | 1.28  | 1.754  | 2.592 | 2.328  | 0.985 | 0.881 | 0.925 | 1     | 0.988 |
| DB01199 | Tubocurarine                        | 2.214 | 1.93  | 1.099  | 1.343 | 1.118  | 0.984 | 0.974 | 0.784 | 0.883 | 0.817 |
| DB04841 | Flunarizine                         | 2.219 | 1.321 | 1.114  | 1.968 | 1.23   | 0.999 | 0.928 | 0.887 | 0.986 | 0.898 |
| DB00904 | Ondansetron                         | 2.222 | 1.682 | 0.664  | 1.892 | 1.152  | 0.981 | 0.943 | 0.664 | 0.968 | 0.832 |
| DB06707 | Levonordefrin                       | 2.222 | 2.139 | 3.76   | -0.19 | 2.383  | 0.94  | 0.93  | 0.988 | 0.39  | 0.953 |
| DB01028 | Methoxyflurane                      | 2.225 | 1.476 | 2.124  | 1.069 | 0.513  | 0.981 | 0.924 | 0.969 | 0.829 | 0.614 |
| DB01454 | Midomafetamine                      | 2.225 | 1.433 | 1.588  | 1.366 | 0.253  | 0.985 | 0.9   | 0.915 | 0.88  | 0.519 |
| DB01329 | Cefoperazone                        | 2.228 | 2.374 | 0.84   | 1.606 | 2.245  | 0.935 | 0.952 | 0.784 | 0.909 | 0.935 |
| DB00493 | Cefotaxime                          | 2.229 | 1.743 | 1.212  | 0.688 | 0.22   | 0.985 | 0.942 | 0.819 | 0.666 | 0.517 |
| DB01081 | Diphenoxylate                       | 2.243 | 2.466 | -2.194 | 1.21  | 1.272  | 0.981 | 0.985 | 0.003 | 0.743 | 0.859 |
| DB03109 | N-Acetyl-D-Allosamine               | 2.247 | 2.164 | 1.939  | 1.66  | 1.953  | 0.963 | 0.95  | 0.908 | 0.893 | 0.929 |
| DB04404 | Allosamizoline                      | 2.247 | 2.164 | 1.939  | 1.66  | 1.953  | 0.963 | 0.95  | 0.908 | 0.893 | 0.929 |
| DB09224 | Melperone                           | 2.249 | 1.417 | 2.475  | 1.571 | 0.784  | 0.985 | 0.898 | 0.988 | 0.944 | 0.723 |
| DB01349 | Tasosartan                          | 2.252 | 2.36  | 2.033  | 0.247 | 2.152  | 0.935 | 0.932 | 0.936 | 0.585 | 0.94  |
| DB06817 | Raltegravir                         | 2.252 | 2.189 | 1.019  | 2.242 | 2.044  | 0.973 | 0.968 | 0.762 | 0.952 | 0.948 |
| DB01069 | Promethazine                        | 2.254 | 1.531 | 2.245  | 2.948 | 1.112  | 0.999 | 0.957 | 0.981 | 1     | 0.873 |
| DB01245 | Decamethonium                       | 2.254 | 2.966 | 0.859  | 0.087 | 1.57   | 0.955 | 0.973 | 0.741 | 0.402 | 0.939 |
| DB01631 | Methyl Nonanoate (Ester)            | 2.255 | 1.486 | 3.064  | 0.121 | 1.214  | 0.976 | 0.936 | 0.992 | 0.493 | 0.9   |
| DB00708 | Sufentanil                          | 2.259 | 2.181 | 0.902  | 1.402 | 0.893  | 0.982 | 0.978 | 0.704 | 0.899 | 0.743 |
| DB01595 | Nitrazepam                          | 2.271 | 1.251 | 1.663  | 0.406 | 0.685  | 0.985 | 0.886 | 0.923 | 0.55  | 0.683 |
| DB00483 | Gallamine Triethiodide              | 2.28  | 2.2   | 1.255  | 2.386 | 1.253  | 0.985 | 0.98  | 0.837 | 0.995 | 0.856 |
| DB01233 | Metoclopramide                      | 2.282 | 1.406 | 1.847  | 1.701 | 0.18   | 0.989 | 0.909 | 0.94  | 0.947 | 0.472 |
| DB00374 | Treprostinil                        | 2.283 | 1.531 | 0.731  | 1.34  | 0.856  | 0.99  | 0.924 | 0.642 | 0.839 | 0.739 |
| DB02057 | (S)-AMPA                            | 2.287 | 2.873 | 0.96   | 0.623 | -0.181 | 0.987 | 0.999 | 0.721 | 0.489 | 0.348 |

|         |                                                                                                                  |       |       |        |        |        |       |       |       |       |       |
|---------|------------------------------------------------------------------------------------------------------------------|-------|-------|--------|--------|--------|-------|-------|-------|-------|-------|
| DB00450 | Droperidol                                                                                                       | 2.295 | 1.229 | 2.903  | 1.453  | 0.832  | 0.989 | 0.872 | 0.995 | 0.907 | 0.735 |
| DB04868 | Nilotinib                                                                                                        | 2.295 | 0.853 | 0.261  | 1.161  | 1.633  | 0.998 | 0.807 | 0.544 | 0.896 | 0.967 |
| DB09409 | Magnesium acetate tetrahydrate                                                                                   | 2.295 | 1.996 | 0.651  | 1.862  | 1.121  | 0.981 | 0.972 | 0.609 | 0.988 | 0.818 |
| DB09481 | Magnesium carbonate                                                                                              | 2.295 | 1.996 | 0.651  | 1.862  | 1.121  | 0.981 | 0.972 | 0.609 | 0.988 | 0.818 |
| DB00458 | Imipramine                                                                                                       | 2.298 | 1.591 | 1.762  | 2.037  | 0.513  | 0.992 | 0.963 | 0.947 | 0.991 | 0.65  |
| DB07374 | Anisomycin                                                                                                       | 2.299 | 1.914 | 1.151  | -2.128 | 1.728  | 0.985 | 0.957 | 0.726 | 0.004 | 0.941 |
| DB08437 | Puromycin                                                                                                        | 2.299 | 1.914 | 1.151  | -2.128 | 1.728  | 0.985 | 0.957 | 0.726 | 0.004 | 0.941 |
| DB00307 | Bexarotene                                                                                                       | 2.305 | 3.003 | 1.413  | 0.616  | 0.489  | 0.987 | 0.999 | 0.944 | 0.678 | 0.632 |
| DB02494 | Alpha-Hydroxy-Beta-Phenyl-Propionic Acid                                                                         | 2.309 | 1.882 | 1.296  | -2.032 | 1.561  | 0.982 | 0.96  | 0.817 | 0.011 | 0.926 |
| DB02789 | Pregnenolone                                                                                                     | 2.312 | 1.58  | 3.601  | 0.657  | 1.83   | 0.954 | 0.94  | 0.987 | 0.735 | 0.946 |
| DB05679 | Ustekinumab                                                                                                      | 2.322 | 2.206 | 2.986  | 2.165  | 2.774  | 0.967 | 0.957 | 0.97  | 0.934 | 0.986 |
| DB01159 | Halothane                                                                                                        | 2.327 | 1.334 | 1.718  | 1.327  | 0.697  | 0.993 | 0.916 | 0.958 | 0.958 | 0.716 |
| DB01624 | Zuclopenthixol                                                                                                   | 2.33  | 2.768 | 1.206  | 1.371  | -0.265 | 0.982 | 0.999 | 0.816 | 0.918 | 0.289 |
| DB09203 | Syneprhine                                                                                                       | 2.336 | 2.139 | 2.391  | 2.705  | 2.339  | 0.984 | 0.976 | 0.94  | 0.979 | 0.989 |
| DB00353 | Methylergometrine                                                                                                | 2.346 | 1.363 | 2.511  | 1.801  | 1.237  | 0.986 | 0.892 | 0.988 | 0.956 | 0.854 |
| DB01565 | Dihydromorphine                                                                                                  | 2.35  | 2.255 | -0.255 | 1.165  | 1.059  | 0.987 | 0.978 | 0.119 | 0.724 | 0.787 |
| DB00490 | Buspirone                                                                                                        | 2.352 | 1.229 | 3.331  | 1.189  | 0.545  | 0.992 | 0.866 | 0.999 | 0.812 | 0.604 |
| DB01559 | Clotiazepam                                                                                                      | 2.357 | 1.64  | 1.56   | 0.182  | 0.407  | 0.986 | 0.949 | 0.9   | 0.439 | 0.57  |
| DB01567 | Fludiazepam                                                                                                      | 2.357 | 1.64  | 1.56   | 0.182  | 0.407  | 0.986 | 0.949 | 0.9   | 0.439 | 0.57  |
| DB01594 | Cinolazepam                                                                                                      | 2.357 | 1.64  | 1.56   | 0.182  | 0.407  | 0.986 | 0.949 | 0.9   | 0.439 | 0.57  |
| DB01175 | Escitalopram                                                                                                     | 2.36  | 1.8   | 1.165  | 0.775  | 0.976  | 0.979 | 0.954 | 0.798 | 0.607 | 0.781 |
| DB00908 | Quinidine                                                                                                        | 2.362 | 0.849 | 3.165  | 2.743  | 1.145  | 0.988 | 0.773 | 0.999 | 0.999 | 0.849 |
| DB00545 | Pyridostigmine                                                                                                   | 2.366 | 1.927 | -0.642 | 0.773  | 1.031  | 0.993 | 0.962 | 0.202 | 0.661 | 0.785 |
| DB09000 | Cyamemazine                                                                                                      | 2.379 | 1.496 | 1.08   | 1.812  | 0.442  | 0.982 | 0.915 | 0.795 | 0.964 | 0.592 |
| DB00215 | Citalopram                                                                                                       | 2.382 | 1.382 | 0.977  | 1.337  | 0.311  | 0.989 | 0.898 | 0.759 | 0.882 | 0.532 |
| DB00543 | Amoxapine                                                                                                        | 2.389 | 0.722 | 1.707  | 1.892  | 1.157  | 0.996 | 0.739 | 0.941 | 0.985 | 0.872 |
| DB00647 | Dextropropoxyphene                                                                                               | 2.393 | 2.473 | 0.313  | 1.118  | 0.769  | 0.986 | 0.994 | 0.46  | 0.733 | 0.691 |
| DB00245 | Benzatropine                                                                                                     | 2.397 | 1.671 | 1.582  | 1.809  | 0.479  | 0.992 | 0.954 | 0.922 | 0.969 | 0.617 |
| DB00775 | Tirofiban                                                                                                        | 2.417 | 2.524 | 1.233  | 0.758  | 2.293  | 0.947 | 0.956 | 0.829 | 0.715 | 0.949 |
| DB06743 | Ginkgolide A                                                                                                     | 2.436 | 2.504 | 2.214  | 3.293  | 2.414  | 0.965 | 0.964 | 0.942 | 0.986 | 0.961 |
| DB00909 | Zonisamide                                                                                                       | 2.437 | 1.837 | 3.614  | 2.043  | 0.967  | 0.993 | 0.976 | 1     | 0.989 | 0.8   |
| DB00572 | Atropine                                                                                                         | 2.443 | 1.826 | 0.995  | 1.847  | -0.006 | 0.992 | 0.959 | 0.767 | 0.969 | 0.425 |
| DB01403 | Methotrimeprazine                                                                                                | 2.451 | 1.531 | 3.117  | 2.1    | 0.632  | 0.994 | 0.931 | 0.998 | 0.986 | 0.68  |
| DB00285 | Venlafaxine                                                                                                      | 2.476 | 1.94  | 0.279  | 1.423  | 0.617  | 0.991 | 0.975 | 0.486 | 0.922 | 0.665 |
| DB01118 | Amiodarone                                                                                                       | 2.481 | 2.244 | 1.458  | 2.251  | 1.863  | 0.999 | 0.994 | 0.906 | 0.993 | 0.978 |
| DB00234 | Reboxetine                                                                                                       | 2.492 | 1.88  | 0.698  | 0.886  | 0.776  | 0.99  | 0.959 | 0.633 | 0.644 | 0.709 |
| DB06731 | Seprooxetine                                                                                                     | 2.494 | 1.786 | 0.097  | 1.392  | 0.384  | 0.993 | 0.954 | 0.39  | 0.899 | 0.563 |
| DB04465 | Lactose                                                                                                          | 2.504 | 2.201 | 0.162  | 0.858  | 1.222  | 0.989 | 0.972 | 0.263 | 0.69  | 0.86  |
| DB00777 | Propiomazine                                                                                                     | 2.513 | 1.469 | 1.154  | 1.482  | 0.187  | 0.993 | 0.915 | 0.816 | 0.92  | 0.482 |
| DB01776 | M-Cresol                                                                                                         | 2.525 | 2.219 | 0.648  | 1.566  | 2.87   | 0.948 | 0.936 | 0.711 | 0.934 | 0.97  |
| DB04838 | Cyclandelate                                                                                                     | 2.534 | 2.902 | 2.263  | 0.92   | 2.529  | 0.947 | 0.973 | 0.946 | 0.848 | 0.96  |
| DB00967 | Desloratadine                                                                                                    | 2.552 | 2.143 | 1.049  | 1.642  | 0.193  | 0.991 | 0.986 | 0.788 | 0.945 | 0.476 |
| DB13151 | Anti-inhibitor coagulant complex                                                                                 | 2.571 | 1.741 | 1.545  | 1.359  | 1.47   | 0.991 | 0.937 | 0.893 | 0.819 | 0.909 |
| DB08879 | Belimumab                                                                                                        | 2.595 | 2.43  | 2.126  | 2.9    | 2.369  | 0.964 | 0.961 | 0.932 | 0.973 | 0.946 |
| DB00578 | Carbenicillin                                                                                                    | 2.6   | 2.489 | 2.003  | 0.81   | 1.743  | 0.958 | 0.948 | 0.94  | 0.823 | 0.915 |
| DB00979 | Cyclopentolate                                                                                                   | 2.6   | 2.489 | 2.003  | 0.81   | 1.743  | 0.958 | 0.948 | 0.94  | 0.823 | 0.915 |
| DB00418 | Secobarbital                                                                                                     | 2.603 | 1.756 | 1.397  | 1.676  | 1.726  | 0.995 | 0.958 | 0.877 | 0.953 | 0.958 |
| DB00459 | Acitretin                                                                                                        | 2.609 | 3.444 | 0.242  | 0.073  | 1.213  | 0.992 | 0.998 | 0.333 | 0.452 | 0.84  |
| DB01104 | Sertraline                                                                                                       | 2.609 | 1.769 | 1.952  | 2.023  | 0.698  | 0.999 | 0.969 | 0.956 | 0.987 | 0.707 |
| DB04016 | 2-[3-((Methyl[1-(2-Naphthoyl)Piperidin-4-Yl]Amino)Carbonyl)-2-Naphthyl]-1-(1-Naphthyl)-2-Oxoethylphosphonic Acid | 2.62  | 2.866 | 2.598  | -0.277 | 2.388  | 0.952 | 0.971 | 0.957 | 0.207 | 0.946 |
| DB00372 | Thiethylperazine                                                                                                 | 2.625 | 1.51  | 2.022  | 2.06   | 0.898  | 0.993 | 0.927 | 0.959 | 0.993 | 0.769 |
| DB09018 | Bromopride                                                                                                       | 2.655 | 2.278 | 3.493  | 3.144  | 2.113  | 0.96  | 0.934 | 0.984 | 0.979 | 0.934 |
| DB01497 | Etorphine                                                                                                        | 2.663 | 2.504 | 0.407  | 1.571  | 1.489  | 0.99  | 0.994 | 0.491 | 0.941 | 0.92  |
| DB00985 | Dimenhydrinate                                                                                                   | 2.666 | 1.798 | 0.562  | 1.46   | 0.206  | 0.996 | 0.965 | 0.604 | 0.914 | 0.499 |

|         |                                                                                   |       |       |        |       |        |       |       |       |       |       |
|---------|-----------------------------------------------------------------------------------|-------|-------|--------|-------|--------|-------|-------|-------|-------|-------|
| DB06717 | Fosaprepitant                                                                     | 2.702 | 2.382 | 1.422  | 3.543 | 2.396  | 0.979 | 0.958 | 0.845 | 0.994 | 0.964 |
| DB09048 | Netupitant                                                                        | 2.702 | 2.382 | 1.422  | 3.543 | 2.396  | 0.979 | 0.958 | 0.845 | 0.994 | 0.964 |
| DB09291 | Rolapitant                                                                        | 2.702 | 2.382 | 1.422  | 3.543 | 2.396  | 0.979 | 0.958 | 0.845 | 0.994 | 0.964 |
| DB00142 | Glutamic Acid                                                                     | 2.718 | 1.513 | 0.85   | 1.975 | 1.069  | 0.999 | 0.972 | 0.773 | 0.995 | 0.894 |
| DB00312 | Pentobarbital                                                                     | 2.721 | 1.35  | 1.582  | 1.621 | 1.205  | 0.995 | 0.894 | 0.912 | 0.961 | 0.887 |
| DB00283 | Clemastine                                                                        | 2.723 | 2.281 | 1.118  | 2.127 | 0.638  | 0.997 | 0.99  | 0.818 | 0.994 | 0.689 |
| DB00237 | Butabarbital                                                                      | 2.724 | 1.598 | 2.193  | 0.557 | 0.919  | 0.996 | 0.944 | 0.971 | 0.621 | 0.779 |
| DB00241 | Butalbital                                                                        | 2.724 | 1.598 | 2.193  | 0.557 | 0.919  | 0.996 | 0.944 | 0.971 | 0.621 | 0.779 |
| DB00306 | Talbutal                                                                          | 2.724 | 1.598 | 2.193  | 0.557 | 0.919  | 0.996 | 0.944 | 0.971 | 0.621 | 0.779 |
| DB00463 | Metharbital                                                                       | 2.724 | 1.598 | 2.193  | 0.557 | 0.919  | 0.996 | 0.944 | 0.971 | 0.621 | 0.779 |
| DB00794 | Primidone                                                                         | 2.724 | 1.598 | 2.193  | 0.557 | 0.919  | 0.996 | 0.944 | 0.971 | 0.621 | 0.779 |
| DB00933 | Mesoridazine                                                                      | 2.726 | 1.367 | 1.32   | 1.815 | 1.088  | 0.998 | 0.901 | 0.86  | 0.98  | 0.83  |
| DB01043 | Memantine                                                                         | 2.747 | 2.375 | 1.004  | 1.564 | 1.265  | 0.993 | 0.988 | 0.737 | 0.934 | 0.873 |
| DB01228 | Encainide                                                                         | 2.748 | 2.563 | 3.901  | 2.171 | 1.026  | 0.992 | 0.99  | 1     | 0.985 | 0.795 |
| DB00514 | Dextromethorphan                                                                  | 2.75  | 1.501 | -0.832 | 2.533 | 1.942  | 0.998 | 0.923 | 0.143 | 0.995 | 0.976 |
| DB01075 | Diphenhydramine                                                                   | 2.752 | 1.932 | 0.427  | 1.694 | 0.389  | 0.997 | 0.967 | 0.577 | 0.952 | 0.576 |
| DB04819 | Methapyrilene                                                                     | 2.753 | 2.004 | 0.955  | 1.104 | 0.385  | 0.996 | 0.98  | 0.76  | 0.807 | 0.565 |
| DB00723 | Methoxamine                                                                       | 2.755 | 2.711 | 1.01   | 0.602 | 2.148  | 0.958 | 0.953 | 0.828 | 0.775 | 0.929 |
| DB00568 | Cinnarizine                                                                       | 2.758 | 1.669 | 2.595  | 1.845 | 0.979  | 0.999 | 0.959 | 0.987 | 0.986 | 0.825 |
| DB00770 | Alprostadil                                                                       | 2.765 | 1.909 | 1.565  | 2.161 | 2.173  | 0.994 | 0.966 | 0.907 | 0.985 | 0.982 |
| DB00160 | L-Alanine                                                                         | 2.766 | 2.084 | 0.285  | 0.842 | 0.676  | 0.997 | 0.978 | 0.496 | 0.697 | 0.675 |
| DB02517 | D-Glutamic Acid                                                                   | 2.768 | 2.08  | 1.589  | 0.786 | 0.726  | 0.997 | 0.982 | 0.902 | 0.658 | 0.692 |
| DB02504 | [3-(1-Benzyl-3-Carbamoylmethyl-2-Methyl-1h-Indol-5-Yloxy)-Propyl]-Phosphonic Acid | 2.772 | 2.532 | 2.573  | 4.258 | 2.927  | 0.972 | 0.951 | 0.956 | 0.994 | 0.978 |
| DB00424 | Hyoscyamine                                                                       | 2.79  | 1.941 | 0.324  | 1.375 | 0.359  | 0.993 | 0.966 | 0.481 | 0.869 | 0.547 |
| DB00889 | Granisetron                                                                       | 2.792 | 2.703 | 2.476  | 1.33  | 0.743  | 0.996 | 0.994 | 0.983 | 0.851 | 0.692 |
| DB00996 | Gabapentin                                                                        | 2.796 | 2.135 | 0.698  | 1.914 | 1.61   | 1     | 0.985 | 0.657 | 0.99  | 0.951 |
| DB08235 | N-[2-(2-methyl-1H-indol-3-yl)ethyl]thiophene-2-carboxamide                        | 2.799 | 1.317 | 1.409  | 1.38  | 2.352  | 0.996 | 0.871 | 0.937 | 0.859 | 0.987 |
| DB08236 | (2S)-2-(3-bromophenyl)-3-(5-chloro-2-hydroxyphenyl)-1,3-thiazolidin-4-one         | 2.799 | 1.317 | 1.409  | 1.38  | 2.352  | 0.996 | 0.871 | 0.937 | 0.859 | 0.987 |
| DB05777 | Thrombomodulin Alfa                                                               | 2.808 | 2.652 | 2.052  | 2.004 | 2.652  | 0.963 | 0.96  | 0.938 | 0.946 | 0.958 |
| DB00333 | Methadone                                                                         | 2.851 | 2.34  | 0.208  | 1.881 | 1.317  | 0.998 | 0.985 | 0.416 | 0.974 | 0.861 |
| DB01242 | Clomipramine                                                                      | 2.869 | 1.544 | 2.469  | 1.75  | 0.348  | 0.998 | 0.94  | 0.983 | 0.97  | 0.555 |
| DB01338 | Pipecuronium                                                                      | 2.887 | 3.153 | 1.87   | 1.631 | 2.031  | 0.963 | 0.975 | 0.943 | 0.942 | 0.958 |
| DB00010 | Sermorelin                                                                        | 2.897 | 2.697 | 1.76   | 2.9   | 3.03   | 0.997 | 0.995 | 0.978 | 0.997 | 0.999 |
| DB01844 | N,N-dimethylformamide                                                             | 2.897 | 2.3   | 3.208  | 2.955 | 2.93   | 0.982 | 0.944 | 0.988 | 0.97  | 0.978 |
| DB04953 | Ezogabine                                                                         | 2.897 | 2.971 | 1.906  | 2.527 | 1.807  | 0.957 | 0.967 | 0.931 | 0.966 | 0.923 |
| DB08869 | Tesamorelin                                                                       | 2.897 | 2.697 | 1.76   | 2.9   | 3.03   | 0.997 | 0.995 | 0.978 | 0.997 | 0.999 |
| DB00659 | Acamprosate                                                                       | 2.901 | 1.554 | 2.166  | 1.407 | 1.713  | 0.998 | 0.94  | 0.972 | 0.935 | 0.965 |
| DB01972 | Guanosine-5'-Monophosphate                                                        | 2.903 | 2.799 | 1.25   | 1.188 | 0.543  | 0.998 | 0.997 | 0.829 | 0.804 | 0.604 |
| DB07475 |                                                                                   | 2.91  | 1.604 | 1.807  | 1.131 | -0.513 | 0.999 | 0.922 | 0.972 | 0.838 | 0.268 |
| DB04896 | Milnacipran                                                                       | 2.917 | 2.229 | 0.291  | 1.794 | 1.385  | 0.998 | 0.981 | 0.468 | 0.981 | 0.895 |
| DB01114 | Chlorphenamine                                                                    | 2.919 | 1.928 | 0.933  | 2.053 | 0.89   | 1     | 0.98  | 0.765 | 0.993 | 0.772 |
| DB03092 | 5-Hydroxymethyl-Chonduritol                                                       | 2.921 | 2.57  | 3.073  | 2.956 | 3.024  | 0.992 | 0.98  | 0.972 | 0.98  | 0.988 |
| DB03439 | 4,6-dideoxy-4-amino-alpha-D-glucose                                               | 2.921 | 2.57  | 3.073  | 2.956 | 3.024  | 0.992 | 0.98  | 0.972 | 0.98  | 0.988 |
| DB01221 | Ketamine                                                                          | 2.923 | 1.675 | 0.441  | 2.469 | 1.553  | 0.998 | 0.953 | 0.585 | 0.998 | 0.94  |
| DB02952 | Alpha-Aminoisobutyric Acid                                                        | 2.923 | 2.735 | 1.423  | 4.1   | 3.215  | 0.981 | 0.969 | 0.879 | 0.991 | 0.991 |
| DB00478 | Rimantadine                                                                       | 2.929 | 3.418 | 4.393  | 2.137 | 2.125  | 0.973 | 0.991 | 0.993 | 0.937 | 0.93  |
| DB01239 | Chlorprothixene                                                                   | 2.936 | 1.986 | 1.396  | 1.968 | 0.421  | 0.997 | 0.98  | 0.876 | 0.981 | 0.584 |
| DB09035 | Nivolumab                                                                         | 3.004 | 3.145 | 2.645  | 1.864 | 2.857  | 0.955 | 0.969 | 0.961 | 0.924 | 0.952 |
| DB09037 | Pembrolizumab                                                                     | 3.004 | 3.145 | 2.645  | 1.864 | 2.857  | 0.955 | 0.969 | 0.961 | 0.924 | 0.952 |
| DB02341 | Mdl 101,146                                                                       | 3.05  | 2.806 | 2.152  | 0.828 | 3.114  | 0.968 | 0.957 | 0.944 | 0.827 | 0.974 |
| DB03925 | Freselestat                                                                       | 3.05  | 2.806 | 2.152  | 0.828 | 3.114  | 0.968 | 0.957 | 0.944 | 0.827 | 0.974 |
| DB02448 | N-Tridecanoic Acid                                                                | 3.067 | 3.05  | 2.695  | 4.832 | 3.43   | 0.972 | 0.976 | 0.97  | 0.995 | 0.987 |
| DB01174 | Phenobarbital                                                                     | 3.092 | 2.07  | 1.775  | 1.649 | 0.932  | 0.998 | 0.979 | 0.941 | 0.951 | 0.783 |

|         |                                                                                                                         |       |       |        |       |        |       |       |       |       |       |
|---------|-------------------------------------------------------------------------------------------------------------------------|-------|-------|--------|-------|--------|-------|-------|-------|-------|-------|
| DB08100 | 2,6-dimethyl-4-[(E)-2-phenylethenyl]phenol                                                                              | 3.14  | 1.971 | 2.871  | 1.909 | 3.154  | 0.978 | 0.967 | 0.984 | 0.978 | 0.985 |
| DB00733 | Pralidoxime                                                                                                             | 3.158 | 2.429 | 2.525  | 2.537 | 2.989  | 0.975 | 0.949 | 0.958 | 0.963 | 0.968 |
| DB00941 | Hexafluronium                                                                                                           | 3.158 | 2.429 | 2.525  | 2.537 | 2.989  | 0.975 | 0.949 | 0.958 | 0.963 | 0.968 |
| DB00944 | Demecarium                                                                                                              | 3.158 | 2.429 | 2.525  | 2.537 | 2.989  | 0.975 | 0.949 | 0.958 | 0.963 | 0.968 |
| DB00989 | Rivastigmine                                                                                                            | 3.158 | 2.429 | 2.525  | 2.537 | 2.989  | 0.975 | 0.949 | 0.958 | 0.963 | 0.968 |
| DB01010 | Edrophonium                                                                                                             | 3.158 | 2.429 | 2.525  | 2.537 | 2.989  | 0.975 | 0.949 | 0.958 | 0.963 | 0.968 |
| DB01057 | Echothiophate                                                                                                           | 3.158 | 2.429 | 2.525  | 2.537 | 2.989  | 0.975 | 0.949 | 0.958 | 0.963 | 0.968 |
| DB01122 | Ambenonium                                                                                                              | 3.158 | 2.429 | 2.525  | 2.537 | 2.989  | 0.975 | 0.949 | 0.958 | 0.963 | 0.968 |
| DB02845 | Methylphosphinic Acid                                                                                                   | 3.158 | 2.429 | 2.525  | 2.537 | 2.989  | 0.975 | 0.949 | 0.958 | 0.963 | 0.968 |
| DB04892 | Phenserine                                                                                                              | 3.158 | 2.429 | 2.525  | 2.537 | 2.989  | 0.975 | 0.949 | 0.958 | 0.963 | 0.968 |
| DB00193 | Tramadol                                                                                                                | 3.179 | 2.857 | -0.053 | 1.806 | 0.957  | 1     | 0.997 | 0.3   | 0.957 | 0.785 |
| DB08964 | Gemeprost                                                                                                               | 3.249 | 3.225 | 1.088  | 1.054 | 2.761  | 0.979 | 0.976 | 0.803 | 0.813 | 0.978 |
| DB08342 | S-PALMITOYL-L-CYSTEINE                                                                                                  | 3.255 | 2.498 | 1.806  | 1.188 | 0.981  | 0.998 | 0.994 | 0.944 | 0.756 | 0.767 |
| DB06209 | Prasugrel                                                                                                               | 3.26  | 3.252 | 3.498  | 3.802 | 2.803  | 0.993 | 0.993 | 0.981 | 0.985 | 0.966 |
| DB01996 | 3-Methylpyridine                                                                                                        | 3.296 | 3.046 | 1.431  | 2.256 | 3.289  | 0.967 | 0.967 | 0.883 | 0.954 | 0.972 |
| DB02697 | Hydroxyaminovaline                                                                                                      | 3.296 | 3.046 | 1.431  | 2.256 | 3.289  | 0.967 | 0.967 | 0.883 | 0.954 | 0.972 |
| DB03033 | 1-Methoxy-4-Sulfone-Benzene                                                                                             | 3.296 | 3.046 | 1.431  | 2.256 | 3.289  | 0.967 | 0.967 | 0.883 | 0.954 | 0.972 |
| DB00758 | Clopidogrel                                                                                                             | 3.365 | 4.022 | 3.224  | 1.423 | 1.466  | 0.975 | 0.987 | 0.983 | 0.912 | 0.94  |
| DB01337 | Pancuronium                                                                                                             | 3.418 | 3.179 | 1.715  | 1.069 | 0.475  | 0.991 | 0.992 | 0.914 | 0.767 | 0.615 |
| DB09290 | Ramosetron                                                                                                              | 3.447 | 3.548 | 3.052  | 4.08  | 2.334  | 0.996 | 0.997 | 0.984 | 0.995 | 0.944 |
| DB08515 | (3AR,6R,6AS)-6-((S)-(S)-CYCLOHEX-2-ENYL)(HYDROXY)METHYL)-6A-METHYL-4-OXO-HEXAHYDRO-2H-FURO[3,2-C]PYRROLE-6-CARBALDEHYDE | 3.457 | 2.268 | 1.26   | 1.158 | -0.864 | 1     | 0.985 | 0.75  | 0.841 | 0.175 |
| DB01597 | Cilastatin                                                                                                              | 3.468 | 3.329 | 2.645  | 2.58  | 3.502  | 0.98  | 0.981 | 0.961 | 0.946 | 0.979 |
| DB06204 | Tapentadol                                                                                                              | 3.473 | 3.275 | -0.242 | 1.266 | 1.398  | 1     | 0.999 | 0.174 | 0.794 | 0.892 |
| DB00674 | Galantamine                                                                                                             | 3.48  | 3.298 | 3.057  | 2.59  | 1.88   | 1     | 1     | 0.999 | 0.999 | 0.972 |
| DB02763 | 5-Mercapto-2-Nitro-Benzoic Acid                                                                                         | 3.488 | 3.009 | 4.368  | 3.598 | 3.77   | 0.984 | 0.983 | 0.995 | 0.983 | 0.994 |
| DB00209 | Tropium                                                                                                                 | 3.498 | 4.121 | 1.665  | 1.012 | 2.304  | 0.976 | 0.987 | 0.907 | 0.821 | 0.965 |
| DB01289 | Glisoxepide                                                                                                             | 3.545 | 3.548 | 2.934  | 4.884 | 3.671  | 1     | 1     | 0.971 | 1     | 1     |
| DB00332 | Ipratropium                                                                                                             | 3.553 | 3.084 | 1.519  | 0.718 | 1.917  | 0.98  | 0.971 | 0.877 | 0.704 | 0.96  |
| DB00383 | Oxyphencyclimine                                                                                                        | 3.553 | 3.084 | 1.519  | 0.718 | 1.917  | 0.98  | 0.971 | 0.877 | 0.704 | 0.96  |
| DB00462 | Methscopolamine bromide                                                                                                 | 3.553 | 3.084 | 1.519  | 0.718 | 1.917  | 0.98  | 0.971 | 0.877 | 0.704 | 0.96  |
| DB00505 | Tridihexethyl                                                                                                           | 3.553 | 3.084 | 1.519  | 0.718 | 1.917  | 0.98  | 0.971 | 0.877 | 0.704 | 0.96  |
| DB00517 | Anisotropine methylbromide                                                                                              | 3.553 | 3.084 | 1.519  | 0.718 | 1.917  | 0.98  | 0.971 | 0.877 | 0.704 | 0.96  |
| DB00771 | Clidinium                                                                                                               | 3.553 | 3.084 | 1.519  | 0.718 | 1.917  | 0.98  | 0.971 | 0.877 | 0.704 | 0.96  |
| DB08997 | Dexetimide                                                                                                              | 3.553 | 3.084 | 1.519  | 0.718 | 1.917  | 0.98  | 0.971 | 0.877 | 0.704 | 0.96  |
| DB09262 | Imidafenacin                                                                                                            | 3.553 | 3.084 | 1.519  | 0.718 | 1.917  | 0.98  | 0.971 | 0.877 | 0.704 | 0.96  |
| DB06594 | Agomelatine                                                                                                             | 3.555 | 2.599 | 0.876  | 2.233 | 1.247  | 0.998 | 0.996 | 0.668 | 0.994 | 0.863 |
| DB01273 | Varenicline                                                                                                             | 3.574 | 3.666 | 1.66   | 1.905 | 2.304  | 0.977 | 0.984 | 0.912 | 0.953 | 0.956 |
| DB09028 | Cytisine                                                                                                                | 3.574 | 3.666 | 1.66   | 1.905 | 2.304  | 0.977 | 0.984 | 0.912 | 0.953 | 0.956 |
| DB00139 | Succinic acid                                                                                                           | 3.586 | 2.585 | 1.837  | 0.879 | 0.945  | 1     | 0.993 | 0.958 | 0.776 | 0.796 |
| DB04843 | Mepenzolate                                                                                                             | 3.616 | 3.73  | 1.823  | 1.132 | 2.14   | 0.98  | 0.981 | 0.925 | 0.849 | 0.965 |
| DB01333 | Cefradine                                                                                                               | 3.758 | 4.438 | 2.121  | 1.196 | 2.417  | 0.988 | 0.993 | 0.95  | 0.825 | 0.98  |
| DB00980 | Ramelteon                                                                                                               | 3.766 | 3.416 | 1.167  | 1.956 | 1.926  | 0.994 | 0.995 | 0.811 | 0.98  | 0.957 |
| DB09071 | Tasimelteon                                                                                                             | 3.766 | 3.416 | 1.167  | 1.956 | 1.926  | 0.994 | 0.995 | 0.811 | 0.98  | 0.957 |
| DB01173 | Orphenadrine                                                                                                            | 3.776 | 2.579 | 1.367  | 2.408 | 0.667  | 1     | 0.997 | 0.881 | 0.999 | 0.705 |
| DB06738 | Ketobemidone                                                                                                            | 3.801 | 3.125 | -0.001 | 2.139 | 2.036  | 1     | 1     | 0.323 | 0.996 | 0.979 |
| DB00157 | NADH                                                                                                                    | 3.809 | 1.631 | -1.714 | 2.259 | 1.335  | 1     | 0.989 | 0.034 | 1     | 0.969 |
| DB00964 | Apraclonidine                                                                                                           | 3.833 | 3.327 | 4.784  | 0.141 | 3.172  | 0.986 | 0.979 | 0.997 | 0.489 | 0.982 |
| DB00981 | Physostigmine                                                                                                           | 3.84  | 3.391 | 2.544  | 1.263 | 2.232  | 0.983 | 0.982 | 0.975 | 0.869 | 0.967 |
| DB06441 | Cangrelor                                                                                                               | 3.84  | 3.834 | 3.82   | 3.165 | 2.769  | 0.992 | 0.998 | 0.99  | 0.972 | 0.966 |
| DB04853 | Binodenoson                                                                                                             | 3.862 | 3.858 | 1.796  | 0.686 | 3.551  | 0.989 | 0.992 | 0.926 | 0.788 | 0.984 |
| DB00633 | Dexmedetomidine                                                                                                         | 3.931 | 2.608 | 2.79   | 0.233 | 2.062  | 0.993 | 0.987 | 0.984 | 0.337 | 0.975 |
| DB01170 | Guanethidine                                                                                                            | 3.931 | 2.608 | 2.79   | 0.233 | 2.062  | 0.993 | 0.987 | 0.984 | 0.337 | 0.975 |
| DB04688 | Methylecgonine                                                                                                          | 3.958 | 4.015 | 2.884  | 1.38  | 4.067  | 0.984 | 0.979 | 0.976 | 0.909 | 0.986 |
| DB01339 | Vecuronium                                                                                                              | 3.966 | 4.51  | 4.525  | 3.082 | 2.541  | 0.99  | 0.996 | 0.993 | 0.98  | 0.95  |

|         |                                                                              |       |       |        |       |       |       |       |       |       |       |
|---------|------------------------------------------------------------------------------|-------|-------|--------|-------|-------|-------|-------|-------|-------|-------|
| DB07441 | 3-[(9-CYANO-9,10-DIHYDRO-10-METHYLACRIDIN-9-YL)CARBONYL]AMINO}PROPANOIC ACID | 4.011 | 3.568 | 2.841  | 1.19  | 3.735 | 0.983 | 0.983 | 0.976 | 0.841 | 0.987 |
| DB07909 | (1S,2S,5S)2-(4-GLUTARIDYLBENZYL)-5-PHENYL-1-CYCLOHEXANOL                     | 4.011 | 3.568 | 2.841  | 1.19  | 3.735 | 0.983 | 0.983 | 0.976 | 0.841 | 0.987 |
| DB08562 | 4-(4-STYRYL-PHENYLCARBAMOYL)-BUTYRIC ACID                                    | 4.011 | 3.568 | 2.841  | 1.19  | 3.735 | 0.983 | 0.983 | 0.976 | 0.841 | 0.987 |
| DB00454 | Meperidine                                                                   | 4.103 | 3.163 | -0.025 | 2.107 | 1.563 | 1     | 0.999 | 0.362 | 0.991 | 0.943 |
| DB01251 | Gliquidone                                                                   | 4.139 | 3.961 | 3.428  | 5.294 | 3.879 | 1     | 1     | 0.984 | 1     | 1     |
| DB01243 | Chloroxine                                                                   | 4.175 | 4.068 | 1.99   | 3     | 2.732 | 0.984 | 0.987 | 0.939 | 0.993 | 0.975 |
| DB01090 | Pentolinium                                                                  | 4.209 | 4.106 | 2.667  | 5.419 | 4.169 | 1     | 0.997 | 0.964 | 1     | 0.999 |
| DB00229 | Cefotiam                                                                     | 4.304 | 4.183 | 1.522  | 1.007 | 3.805 | 0.987 | 0.99  | 0.881 | 0.783 | 0.987 |
| DB00382 | Tacrine                                                                      | 4.314 | 3.753 | 2.462  | 2.046 | 1.848 | 1     | 1     | 0.986 | 0.989 | 0.97  |
| DB04835 | Maraviroc                                                                    | 4.33  | 3.952 | 2.963  | 1.347 | 3.95  | 0.993 | 0.987 | 0.974 | 0.916 | 0.985 |
| DB08409 | 4-NITRO-BENZYLPHOSPHONOBUTANOYL-GLYCINE                                      | 4.373 | 3.577 | 3.501  | 0.987 | 3.948 | 0.986 | 0.976 | 0.986 | 0.797 | 0.984 |
| DB05316 | Pimavanserin                                                                 | 4.389 | 3.493 | 2.423  | 1.028 | 3.547 | 0.986 | 0.979 | 0.97  | 0.819 | 0.981 |
| DB00202 | Succinylcholine                                                              | 4.731 | 4.398 | 2.275  | 0.852 | 2.616 | 0.989 | 0.993 | 0.958 | 0.716 | 0.986 |
| DB00747 | Scopolamine                                                                  | 5.091 | 3.741 | 1.556  | 0.671 | 1.834 | 0.998 | 1     | 0.897 | 0.615 | 0.96  |
| DB01226 | Mivacurium                                                                   | 5.102 | 4.517 | 2.414  | 2.093 | 3.161 | 0.997 | 0.995 | 0.964 | 0.984 | 0.99  |
| DB00657 | Mecamylamine                                                                 | 5.259 | 4.947 | 2.412  | 2.818 | 4.114 | 0.99  | 0.997 | 0.976 | 0.993 | 0.995 |
| DB01287 |                                                                              | 5.333 | 4.495 | 4.366  | 0.814 | 3.107 | 0.995 | 0.99  | 0.999 | 0.713 | 0.985 |
| DB02365 | 1,10-Phenanthroline                                                          | 5.36  | 5.22  | 1.571  | 2.095 | 5.617 | 0.994 | 0.999 | 0.908 | 0.976 | 0.998 |
| DB01060 | Amoxicillin                                                                  | 5.366 | 3.801 | 1.947  | 1.15  | 3.841 | 0.992 | 0.986 | 0.942 | 0.82  | 0.987 |
| DB01465 | 2,5-Dimethoxyamphetamine                                                     | 5.366 | 3.801 | 1.947  | 1.15  | 3.841 | 0.992 | 0.986 | 0.942 | 0.82  | 0.987 |
| DB01516 | 3,4,5-Trimethoxyamphetamine                                                  | 5.366 | 3.801 | 1.947  | 1.15  | 3.841 | 0.992 | 0.986 | 0.942 | 0.82  | 0.987 |
| DB00513 | Aminocaproic Acid                                                            | 5.431 | 3.901 | 1.395  | 0.021 | 4.401 | 0.999 | 0.991 | 0.867 | 0.426 | 0.999 |
| DB01038 | Carphenazine                                                                 | 5.487 | 4.461 | 3.911  | 6.027 | 3.956 | 0.996 | 0.998 | 0.99  | 1     | 0.993 |
| DB09097 | Quinagolide                                                                  | 5.487 | 4.461 | 3.911  | 6.027 | 3.956 | 0.996 | 0.998 | 0.99  | 1     | 0.993 |
| DB00501 | Cimetidine                                                                   | 5.692 | 4.903 | 3.829  | 5.358 | 4.64  | 0.998 | 0.996 | 0.994 | 0.996 | 0.995 |
| DB00411 | Carbamoylcholine                                                             | 5.803 | 4.534 | 1.554  | 1.343 | 2.357 | 1     | 1     | 0.899 | 0.888 | 0.994 |
| DB01253 | Ergometrine                                                                  | 5.941 | 4.377 | 4.193  | 1.479 | 2.442 | 1     | 1     | 1     | 0.944 | 0.995 |
| DB04871 | Lorcaserin                                                                   | 5.963 | 4.15  | 1.103  | 0.619 | 3.513 | 0.997 | 0.992 | 0.774 | 0.503 | 0.993 |
| DB01484 | 4-Bromo-2,5-dimethoxyamphetamine                                             | 6.16  | 4.61  | 2.717  | 1.226 | 4.063 | 0.999 | 0.996 | 0.988 | 0.84  | 0.993 |
| DB01278 | Pramlintide                                                                  | 6.177 | 6.638 | 4.399  | 7.164 | 6.292 | 0.999 | 1     | 0.995 | 1     | 0.999 |
| DB00670 | Pirenzepine                                                                  | 6.361 | 5.554 | 0.286  | 1.581 | 2.103 | 0.998 | 0.999 | 0.494 | 0.941 | 0.981 |
| DB01019 | Bethanechol                                                                  | 6.431 | 5.239 | 1.097  | 1.275 | 3.205 | 0.999 | 0.998 | 0.768 | 0.879 | 0.996 |
| DB06709 | Methacholine                                                                 | 6.431 | 5.239 | 1.097  | 1.275 | 3.205 | 0.999 | 0.998 | 0.768 | 0.879 | 0.996 |
| DB09300 | Butylscopolamine                                                             | 6.431 | 5.239 | 1.097  | 1.275 | 3.205 | 0.999 | 0.998 | 0.768 | 0.879 | 0.996 |
| DB07375 | 5-BETA-ANDROSTANE-3,17-DIONE                                                 | 6.528 | 4.709 | 2.933  | 1.372 | 5.102 | 0.997 | 0.997 | 0.991 | 0.906 | 0.999 |
| DB00340 | Metixene                                                                     | 6.861 | 4.956 | 0.635  | 1.959 | 3.009 | 1     | 1     | 0.609 | 0.983 | 0.999 |
| DB00809 | Tropicamide                                                                  | 7.011 | 6.229 | 2.095  | 1.909 | 1.75  | 0.999 | 1     | 0.956 | 0.976 | 0.951 |
| DB00863 | Ranitidine                                                                   | 7.058 | 6.462 | 4.764  | 3.759 | 5.871 | 0.998 | 0.998 | 0.998 | 1     | 0.999 |
| DB00185 | Cevimeline                                                                   | 7.204 | 4.947 | 1.198  | 1.552 | 3.376 | 1     | 0.996 | 0.81  | 0.929 | 0.997 |
| DB00387 | Procyclidine                                                                 | 7.204 | 4.947 | 1.198  | 1.552 | 3.376 | 1     | 0.996 | 0.81  | 0.929 | 0.997 |
| DB00725 | Homatropine methylbromide                                                    | 7.204 | 4.947 | 1.198  | 1.552 | 3.376 | 1     | 0.996 | 0.81  | 0.929 | 0.997 |
| DB00785 | Cryptenamine                                                                 | 7.204 | 4.947 | 1.198  | 1.552 | 3.376 | 1     | 0.996 | 0.81  | 0.929 | 0.997 |
| DB00986 | Glycopyrronium                                                               | 7.204 | 4.947 | 1.198  | 1.552 | 3.376 | 1     | 0.996 | 0.81  | 0.929 | 0.997 |
| DB01085 | Pilocarpine                                                                  | 7.204 | 4.947 | 1.198  | 1.552 | 3.376 | 1     | 0.996 | 0.81  | 0.929 | 0.997 |
| DB01409 | Tiotropium                                                                   | 7.204 | 4.947 | 1.198  | 1.552 | 3.376 | 1     | 0.996 | 0.81  | 0.929 | 0.997 |
| DB02161 | Hydroxy-Phenyl-Acetic Acid 8-Methyl-8-Aza-Bicyclo[3.2.1]Oct-3-Yl Ester       | 7.204 | 4.947 | 1.198  | 1.552 | 3.376 | 1     | 0.996 | 0.81  | 0.929 | 0.997 |
| DB04365 | Arecoline                                                                    | 7.204 | 4.947 | 1.198  | 1.552 | 3.376 | 1     | 0.996 | 0.81  | 0.929 | 0.997 |
| DB06702 | Fesoterodine                                                                 | 7.204 | 4.947 | 1.198  | 1.552 | 3.376 | 1     | 0.996 | 0.81  | 0.929 | 0.997 |
| DB06787 | Hexocyclium                                                                  | 7.204 | 4.947 | 1.198  | 1.552 | 3.376 | 1     | 0.996 | 0.81  | 0.929 | 0.997 |



|         |                                   |        |       |       |       |       |       |       |       |       |       |
|---------|-----------------------------------|--------|-------|-------|-------|-------|-------|-------|-------|-------|-------|
| DB08897 | Aclidinium                        | 7.204  | 4.947 | 1.198 | 1.552 | 3.376 | 1     | 0.996 | 0.81  | 0.929 | 0.997 |
| DB09076 | Umeclidinium                      | 7.204  | 4.947 | 1.198 | 1.552 | 3.376 | 1     | 0.996 | 0.81  | 0.929 | 0.997 |
| DB02586 | 4,7-Dimethyl-[1,10]Phenanthroline | 7.213  | 5.534 | 2.642 | 2.315 | 6.087 | 1     | 0.999 | 0.98  | 0.99  | 1     |
| DB03759 | FG-9041                           | 7.456  | 6.954 | 3.974 | 6.135 | 4.505 | 1     | 0.999 | 0.995 | 1     | 0.993 |
| DB00810 | Biperiden                         | 7.63   | 5.774 | 1.383 | 1.86  | 3.818 | 1     | 0.999 | 0.856 | 0.967 | 1     |
| DB01053 | Benzylpenicillin                  | 8.385  | 7.361 | 5.206 | 1.923 | 5.072 | 0.999 | 1     | 1     | 0.971 | 0.996 |
| DB04599 | Aniracetam                        | 10.281 | 7.398 | 4.571 | 4.86  | 4.326 | 1     | 1     | 1     | 1     | 0.999 |
| DB01140 | Cefadroxil                        | 11.503 | 8.844 | 4.305 | 3.805 | 6.491 | 1     | 1     | 0.998 | 0.998 | 0.998 |

Supplementary Table S6. Network-predicted drug combinations for all the drug pairs from the top 16 high-confidence repurposable drugs.

| Drug A      |                | Drug B      |                | Separation | Number of targets overlapped |
|-------------|----------------|-------------|----------------|------------|------------------------------|
| DrugBank ID | Name           | DrugBank ID | Name           |            |                              |
| DB00700     | Eplerenone     | DB07715     | Emodin         | 0.88       | 0                            |
| DB00700     | Eplerenone     | DB01136     | Carvedilol     | 0.84       | 0                            |
| DB00700     | Eplerenone     | DB00877     | Sirolimus      | 0.76       | 0                            |
| DB00700     | Eplerenone     | DB00970     | Dactinomycin   | 0.75       | 0                            |
| DB00700     | Eplerenone     | DB01103     | Quinacrine     | 0.74       | 0                            |
| DB00700     | Eplerenone     | DB02187     | Equilin        | 0.70       | 0                            |
| DB00700     | Eplerenone     | DB00715     | Paroxetine     | 0.67       | 0                            |
| DB00700     | Eplerenone     | DB01065     | Melatonin      | 0.65       | 0                            |
| DB00877     | Sirolimus      | DB00970     | Dactinomycin   | 0.65       | 0                            |
| DB00700     | Eplerenone     | DB01033     | Mercaptopurine | 0.55       | 0                            |
| DB00244     | Mesalazine     | DB00700     | Eplerenone     | 0.55       | 0                            |
| DB00700     | Eplerenone     | DB01394     | Colchicine     | 0.54       | 0                            |
| DB00539     | Toremifene     | DB00700     | Eplerenone     | 0.53       | 0                            |
| DB00877     | Sirolimus      | DB01065     | Melatonin      | 0.51       | 0                            |
| DB00700     | Eplerenone     | DB01744     | Camphor        | 0.50       | 0                            |
| DB00877     | Sirolimus      | DB01033     | Mercaptopurine | 0.50       | 0                            |
| DB01136     | Carvedilol     | DB07715     | Emodin         | 0.49       | 0                            |
| DB00877     | Sirolimus      | DB01136     | Carvedilol     | 0.43       | 1                            |
| DB00877     | Sirolimus      | DB01103     | Quinacrine     | 0.42       | 0                            |
| DB00877     | Sirolimus      | DB06412     | Oxymetholone   | 0.42       | 0                            |
| DB00877     | Sirolimus      | DB01394     | Colchicine     | 0.41       | 2                            |
| DB00877     | Sirolimus      | DB07715     | Emodin         | 0.40       | 0                            |
| DB01136     | Carvedilol     | DB06412     | Oxymetholone   | 0.39       | 1                            |
| DB00715     | Paroxetine     | DB07715     | Emodin         | 0.39       | 0                            |
| DB00877     | Sirolimus      | DB01744     | Camphor        | 0.33       | 0                            |
| DB00877     | Sirolimus      | DB02187     | Equilin        | 0.33       | 0                            |
| DB01103     | Quinacrine     | DB07715     | Emodin         | 0.32       | 0                            |
| DB01065     | Melatonin      | DB07715     | Emodin         | 0.31       | 1                            |
| DB01033     | Mercaptopurine | DB07715     | Emodin         | 0.28       | 0                            |
| DB00700     | Eplerenone     | DB06412     | Oxymetholone   | 0.27       | 0                            |
| DB00877     | Sirolimus      | DB01029     | Irbesartan     | 0.27       | 0                            |
| DB00970     | Dactinomycin   | DB01136     | Carvedilol     | 0.25       | 0                            |
| DB01033     | Mercaptopurine | DB01065     | Melatonin      | 0.24       | 0                            |
| DB01136     | Carvedilol     | DB01744     | Camphor        | 0.22       | 0                            |
| DB00715     | Paroxetine     | DB00877     | Sirolimus      | 0.22       | 1                            |
| DB00715     | Paroxetine     | DB06412     | Oxymetholone   | 0.22       | 0                            |
| DB00244     | Mesalazine     | DB00877     | Sirolimus      | 0.21       | 0                            |
| DB01103     | Quinacrine     | DB06412     | Oxymetholone   | 0.21       | 1                            |
| DB01136     | Carvedilol     | DB02187     | Equilin        | 0.19       | 0                            |
| DB00244     | Mesalazine     | DB00970     | Dactinomycin   | 0.19       | 0                            |
| DB00715     | Paroxetine     | DB00970     | Dactinomycin   | 0.19       | 0                            |

|         |                |         |                |      |    |
|---------|----------------|---------|----------------|------|----|
| DB00970 | Dactinomycin   | DB01065 | Melatonin      | 0.19 | 0  |
| DB00244 | Mesalazine     | DB01065 | Melatonin      | 0.18 | 1  |
| DB00970 | Dactinomycin   | DB01394 | Colchicine     | 0.18 | 0  |
| DB00539 | Toremifene     | DB01136 | Carvedilol     | 0.17 | 1  |
| DB00700 | Eplerenone     | DB01029 | Irbesartan     | 0.17 | 0  |
| DB01033 | Mercaptopurine | DB01136 | Carvedilol     | 0.17 | 0  |
| DB01065 | Melatonin      | DB01103 | Quinacrine     | 0.15 | 0  |
| DB00970 | Dactinomycin   | DB01033 | Mercaptopurine | 0.15 | 0  |
| DB00244 | Mesalazine     | DB01136 | Carvedilol     | 0.15 | 0  |
| DB01065 | Melatonin      | DB06412 | Oxymetholone   | 0.15 | 1  |
| DB00715 | Paroxetine     | DB01033 | Mercaptopurine | 0.15 | 1  |
| DB00244 | Mesalazine     | DB07715 | Emodin         | 0.14 | 0  |
| DB01394 | Colchicine     | DB07715 | Emodin         | 0.13 | 0  |
| DB01033 | Mercaptopurine | DB01103 | Quinacrine     | 0.13 | 2  |
| DB00970 | Dactinomycin   | DB01103 | Quinacrine     | 0.13 | 0  |
| DB01065 | Melatonin      | DB01136 | Carvedilol     | 0.13 | 1  |
| DB00539 | Toremifene     | DB00877 | Sirolimus      | 0.11 | 0  |
| DB01065 | Melatonin      | DB01744 | Camphor        | 0.10 | 1  |
| DB01136 | Carvedilol     | DB01394 | Colchicine     | 0.10 | 1  |
| DB01394 | Colchicine     | DB06412 | Oxymetholone   | 0.10 | 2  |
| DB01103 | Quinacrine     | DB01394 | Colchicine     | 0.09 | 1  |
| DB00539 | Toremifene     | DB07715 | Emodin         | 0.08 | 1  |
| DB00715 | Paroxetine     | DB01065 | Melatonin      | 0.08 | 0  |
| DB00715 | Paroxetine     | DB01394 | Colchicine     | 0.08 | 0  |
| DB01103 | Quinacrine     | DB01744 | Camphor        | 0.07 | 0  |
| DB01033 | Mercaptopurine | DB06412 | Oxymetholone   | 0.07 | 2  |
| DB01065 | Melatonin      | DB01394 | Colchicine     | 0.07 | 0  |
| DB00715 | Paroxetine     | DB01744 | Camphor        | 0.05 | 0  |
| DB00715 | Paroxetine     | DB02187 | Equilin        | 0.05 | 0  |
| DB00539 | Toremifene     | DB00970 | Dactinomycin   | 0.04 | 0  |
| DB00715 | Paroxetine     | DB01136 | Carvedilol     | 0.04 | 9  |
| DB01065 | Melatonin      | DB02187 | Equilin        | 0.04 | 1  |
| DB00244 | Mesalazine     | DB00715 | Paroxetine     | 0.03 | 0  |
| DB00539 | Toremifene     | DB02187 | Equilin        | 0.03 | 2  |
| DB00539 | Toremifene     | DB01065 | Melatonin      | 0.02 | 1  |
| DB06412 | Oxymetholone   | DB07715 | Emodin         | 0.02 | 1  |
| DB00539 | Toremifene     | DB00715 | Paroxetine     | 0.02 | 0  |
| DB00715 | Paroxetine     | DB01103 | Quinacrine     | 0.01 | 10 |
| DB01103 | Quinacrine     | DB01136 | Carvedilol     | 0.01 | 7  |
| DB00970 | Dactinomycin   | DB06412 | Oxymetholone   | 0.01 | 0  |
| DB01029 | Irbesartan     | DB01136 | Carvedilol     | 0.00 | 0  |
| DB00970 | Dactinomycin   | DB07715 | Emodin         | 0.00 | 0  |
| DB00970 | Dactinomycin   | DB01029 | Irbesartan     | 0.00 | 0  |
| DB01029 | Irbesartan     | DB07715 | Emodin         | 0.00 | 0  |
| DB01744 | Camphor        | DB02187 | Equilin        | 0.00 | 1  |
| DB01744 | Camphor        | DB07715 | Emodin         | 0.00 | 1  |
